# Supplementary material for: Analysis of Arabidopsis thaliana Redox Gene Network Indicates Evolutionary Expansion of Class III Peroxidase in Plants
Source: PubMed Central journal article supplement (PMC6823369; doi:10.1038/s41598-019-52299-y), 2019-10-31
Supplement: 41598_2019_52299_MOESM1_ESM.pdf [file 41598_2019_52299_MOESM1_ESM.pdf]

1 **SUPPLEMENTARY INFORMATION**

2 **for**

**Analysis of *Arabidopsis thaliana* Redox Gene Network Indicates Evolutionary**

**Expansion of Class III Peroxidase in Plants**

3

4

5 Authors: Raffael Azevedo de Carvalho Oliveira<sup>1,2</sup>; Abraão Silveira de Andrade<sup>1</sup>; Danilo

6 Oliveira Imparato<sup>1</sup>; Juliana Gabriela Silva de Lima<sup>2</sup>; Ricardo Victor Machado de Almeida<sup>2</sup>;

7 João Paulo Matos Santos Lima<sup>1,2</sup>; Matheus Augusto de Bittencourt Pasquali<sup>3,4,5</sup>; Rodrigo

8 Juliani Siqueira Dalmolin<sup>1,2\*</sup>

10 <sup>1</sup>Bioinformatics Multidisciplinary Environment - IMD, Federal University of Rio Grande do  
11 Norte, Natal, Brazil;

12 <sup>2</sup>Department of Biochemistry, Federal University of Rio Grande do Norte, Natal, Brazil.

13 <sup>3</sup>Institute of Tropical Medicine, Federal University of Rio Grande do Norte, Natal, Brazil.

14 <sup>4</sup>Unidade Acadêmica de Engenharia de Alimentos, UAEALI, UFCG

15 <sup>5</sup>Programa de Pós-graduação em Recursos Naturais, PPGRN, UFCG

16

17

18 \* Corresponding author

19

20

Rodrigo Juliani Siqueira Dalmolin

21

BioME – Bioinformatics Multidisciplinary Environment.

22

Address: Rua Odilon Gomes de Lima, 1722, Natal – RN. Brazil. Zip code 59078-400.

23

e-mail: rodrigo.dalmolin@imd.ufrn.br

24

25

## Contents

|                                                  |          |
|--------------------------------------------------|----------|
| <b>SUPPLEMENTARY RESULTS AND DISCUSSION.....</b> | <b>3</b> |
| Network clusters connectivity.....               | 3        |
| Evolutionary roots of all network nodes.....     | 3        |
| Class III peroxidase orthologs abundance.....    | 3        |
| <i>Marchantia polymorpha</i> orthologs.....      | 4        |
| Evolutionary trees of orthologous groups.....    | 4        |
| <b>SUPPLEMENTARY FIGURES LEGENDS.....</b>        | <b>5</b> |
| <b>SUPPLEMENTARY TABLES LEGENDS.....</b>         | <b>7</b> |

## 27 1. SUPPLEMENTARY RESULTS AND DISCUSSION

### 28 1.1. Network clusters connectivity

29 Supplementary Figure S1 shows the node degree distribution of the network clusters.  
30 In (a) is depicted node degree distribution of all proteins from *class III peroxidase* cluster  
31 (red continuous line) *versus* the node degree distribution of all proteins in the network  
32 (black dotted line), disregarding chemical compounds; In (b) is depicted node degree  
33 distribution of all proteins from *general* cluster (blue continuous line) *versus* the node  
34 degree distribution of all proteins in the network (black dotted line), disregarding chemical  
35 compounds. This result shows that connectivity is higher in the *general* cluster than *class*  
36 *III peroxidase* cluster; the latter cluster is composed solely by class III peroxidases, which  
37 have few connections between each other, whilst proteins of *general* cluster are well  
38 connected.

39

### 40 1.2. Evolutionary roots of all network nodes

41 In order to assess evolutionary roots of every gene present in the network, the  
42 *geneplast* R/Bioconductor was used. As described in Methods, it calculates the  
43 evolutionary root based on orthology information. Supplementary Figure S2 shows the  
44 eukaryote species tree from STRINGdb (a), and the redox network of *A. thaliana* (b). This  
45 figure is like the one presented in Figure 3, but with evolutionary root information about  
46 every gene in the analysis. Colored diamonds on root labels are linked to node color in the  
47 network: color code range from blue (more ancient root) to orange (more recent root). It is  
48 noteworthy that almost all proteins that emerged in root 9 (which represents the last  
49 common ancestor of land plants) belong to the *class III peroxidase* cluster. Supplementary  
50 Figure S3 depicts a projection of the network, showing the emergence of new nodes at  
51 each root of the species tree. Most of the *general* cluster emerged at the roots of  
52 eukaryotes.

53

### 54 1.3. Class III peroxidase orthologs abundance

55 The following analysis were made to verify the abundance of class III peroxidases in  
56 the 20 species of land plants (present on STRINGdb v10). Supplementary Figure S4  
57 shows a boxplot of class III peroxidase orthologs abundance, which was calculated by the  
58 mean of:

$$\frac{\text{Number of CIII Prx orthologs}}{\text{Total gene count}}$$

59

60 for each species. In (a) is depicted the abundance of class III peroxidase orthologs using  
61 *A. thaliana* orthologs, and (b) the abundance using *O. sativa* orthologs. The results obtained  
62 indicates that the same pattern is present, using different sources of orthologous groups,  
63 which corroborates with the established hypothesis.

64

#### 65 **1.4. *Marchantia polymorpha* orthologs**

66 Data regarding annotation of *M. polymorpha* class III peroxidases were obtained from  
67 PeroxiBase. Orthogroup annotation from PeroxiBase was used to obtain orthology  
68 information of *M. polymorpha*. We identified 8 orthogroups shared by *M. polymorpha*, *A.*  
69 *thaliana*, and *O. sativa*, containing 22 *M. polymorpha* orthologs; 1 orthogroup shared by *M.*  
70 *polymorpha* and *A. thaliana* (without any *O. sativa* ortholog), containing 1 *M. polymorpha*  
71 ortholog; and 1 orthogroup shared by *M. polymorpha* and *O. sativa* (without any *A.*  
72 *thaliana* ortholog), containing 2 *M. polymorpha* orthologs. The results are shown in  
73 Supplementary Figure S5.

74

#### 75 **1.5. Evolutionary trees of orthologous groups**

76 Finally, Supplementary Figures S6-S125 shows the most parsimonious scenario for  
77 the 119 orthologous groups obtained in the analysis. Each tree represents an orthologous  
78 group, which contains one or more genes present in the network. All but PER68  
79 (AT5G58400) were in the analysis.

## 80 2. SUPPLEMENTARY FIGURES LEGENDS

81 **Supplementary Figure S1:** Degree distribution of the network clusters, taking into  
82 account only protein-protein interaction. (a) Degree distribution of proteins from *class III*  
83 *peroxidase* cluster (red). Dotted lines shows degree distribution of whole network,  
84 disregarding chemical compounds. (B) Degree distribution (blue line) of proteins from  
85 *general* cluster. Dotted lines shows degree distribution of whole network, disregarding  
86 chemical compounds.

87

88 **Supplementary Figure S2:** Evolutionary scenario of *Arabidopsis thaliana* redox network.  
89 In (a) is depicted the eukaryote species tree from STRING v10.5. Each leaf node denotes  
90 an species and their phylogeny is drawn in the tree. Root nodes represents the last  
91 common ancestor (LCA) for each taxon. Colored diamonds aside each root node assign  
92 color for the network in (b). Supplementary Figure S2 (b) shows the same redox network,  
93 but with evolution scenario for all network nodes. Colors range from dark blue (more  
94 ancient) to dark orange (more recent). Red nodes have no annotation for evolutionary root.

95

96 **Supplementary Figure S3:** Projection of evolutionary roots in the network. This figure  
97 shows how the redox network of *A. thaliana* have arised and organized its connections.  
98 Network organization ranging from more ancient proteins (dark blue, root 19) to more  
99 recent proteins (root 3, dark orange). Red nodes have no annotation for evolutionary root,  
100 and therefore accounted for root 0.

101

102 **Supplementary Figure S4:** Class III peroxidase abundace. (a) Shows a boxplot of the  
103 class III peroxidase abundance in each taxon analyzed. Eudicots were analyzed using  
104 orthologous groups obtained from STRING v10, using *A. thaliana* class III peroxidases as  
105 query. (b) Shows a boxplot of the class III peroxidase abundance in each taxon analyzed.  
106 Monocots were analyzed using orthologous groups obtained from STRING v10, using *O.*  
107 *sativa* class III peroxidases as query.

108

109 **Supplementary Figure S5:** Class III peroxidase orthologs abundance. Bars indicate the  
110 abundance of class III peroxidase isozymes by species of each taxonomic group  
111 (*Marchantia polymorpha*, *Physcomitrella patens*, *Selaginella moellendorffii*, Eudicots - 8  
112 species, and Monocots - 10 species). Colors indicate whether the OG have *A. thaliana*  
113 orthologs (AT orthologous groups - pink), *O. sativa* orthologs (OS orthologous groups -  
114 green) or orthologs from both species (Common to AT and OS - blue). Dendrogram at the

115 bottom shows the evolutionary relationship among the groups, and its estimated  
116 divergence times (in millions of years – Mya). Abundance is calculated as the mean of  
117 number of class III peroxidase orthologs divided by the gene count of each species.

118

119 **Supplementary Figures S6-125:** The figures S6 to S125 shows the evolutionary roots for  
120 the 119 COGs obtained in our analysis, built using package *geneplast*. In all figures, green  
121 circles represents COG present in that species, and gray circles, absence. Red-hollow  
122 diamond represents inferred root for a given COG and the D-score, which estimates  
123 stability of the inferred root. P-values are generated by permutation analysis.

### 124 3. SUPPLEMENTARY TABLES LEGENDS

125 **Supplementary Table S1:** This table brings description of all genes used in our analysis.  
126 First column indicates STRING ID for each protein; the second column indicates the locus  
127 ID for each protein; third column shows the alias obtained from STRING v10; fourth  
128 column shows alias obtained from PeroxiBase; fifth column shows the defined name  
129 shown in the networks; sixth column indicates protein class (whether is a peroxidase  
130 (PRX), thiol-redox (TR), SOD or other oxido-reductase); the seventh column indicates  
131 protein annotation obtained from STRING v10; eighth column indicates the orthologous  
132 group that each gene is part of; ninth column indicates the inferred evolutionary root  
133 calculated by *geneplast* for each orthologous group; tenth column shows the D-score for  
134 each root; eleventh column shows the adjusted P-value of the *geneplast* analysis, and the  
135 twelfth column shows whether the gene was found only in the GO search (our), PeroxiBase  
136 search (peroxibase), or in both (intersect).

137

138 **Supplementary Table S2:** This table describes the 15 chemical compounds used in our  
139 network analysis. The first column indicates the chemical element name, followed in the  
140 second column by its formula. The third and fourth columns show identifiers for different  
141 databases: KEGG and PubChem. Hydride and Ozone did not have entries in KEGG  
142 database, therefore have empty values.

143

144 **Supplementary Table S3:** This table shows information regarding the 77 genes that not  
145 connect with the network main component. The first column indicates STRING ID for each  
146 protein; the second column indicates the locus ID for each protein; third column shows the  
147 alias obtained from STRING v10; fourth column shows alias obtained from PeroxiBase;  
148 fifth column shows the defined name shown in the networks; sixth column indicates protein  
149 class (whether is a peroxidase (PRX), thiol-redox (TR), SOD or other oxido-reductase);  
150 the seventh column indicates protein annotation obtained from STRING v10; eighth  
151 column indicates the orthologous group that each gene is part of; ninth column indicates  
152 the inferred evolutionary root calculated by *geneplast* for each orthologous group; tenth  
153 column shows the D-score for each root; eleventh column shows the adjusted P-value of  
154 the *geneplast* analysis, and the twelfth column shows whether the gene was found only in  
155 the GO search (our), PeroxiBase search (peroxibase), or in both (intersect).

156

157 **Supplementary Table S4:** This table provides information about gene abundance of the  
158 whole network, using orthology information obtained from *A. thaliana* OGs. The OGs were

159 divided according to the function related to. In total, 44 COGs class III peroxidase-related;  
160 8 peroxidase-related; 4 SOD-related, 28 thiol-redox related, and 35 COGs related to other  
161 oxido-reductases. Each column represents one of the 20 land plant species. The STRING  
162 identifier for each species is provided above its name.

163

164 **Supplementary Table S5:** This table provides information of class III protein abundance,  
165 using orthology information obtained from *O. sativa* COGs. 44 COGs were used in this  
166 table. Each column represents one of the 20 land plant species, which are divided based  
167 on its taxonomic group. The STRING identifier for each species is provided above its  
168 name. The ortholog count, total of genes and the class III genes ratio is provided for each  
169 species in the last lines. This ratio is the total amount of class III orthologs divided by the  
170 total number of genes for each species.



# Supplementary Figure S1

## Network degree distribution

No chemicals

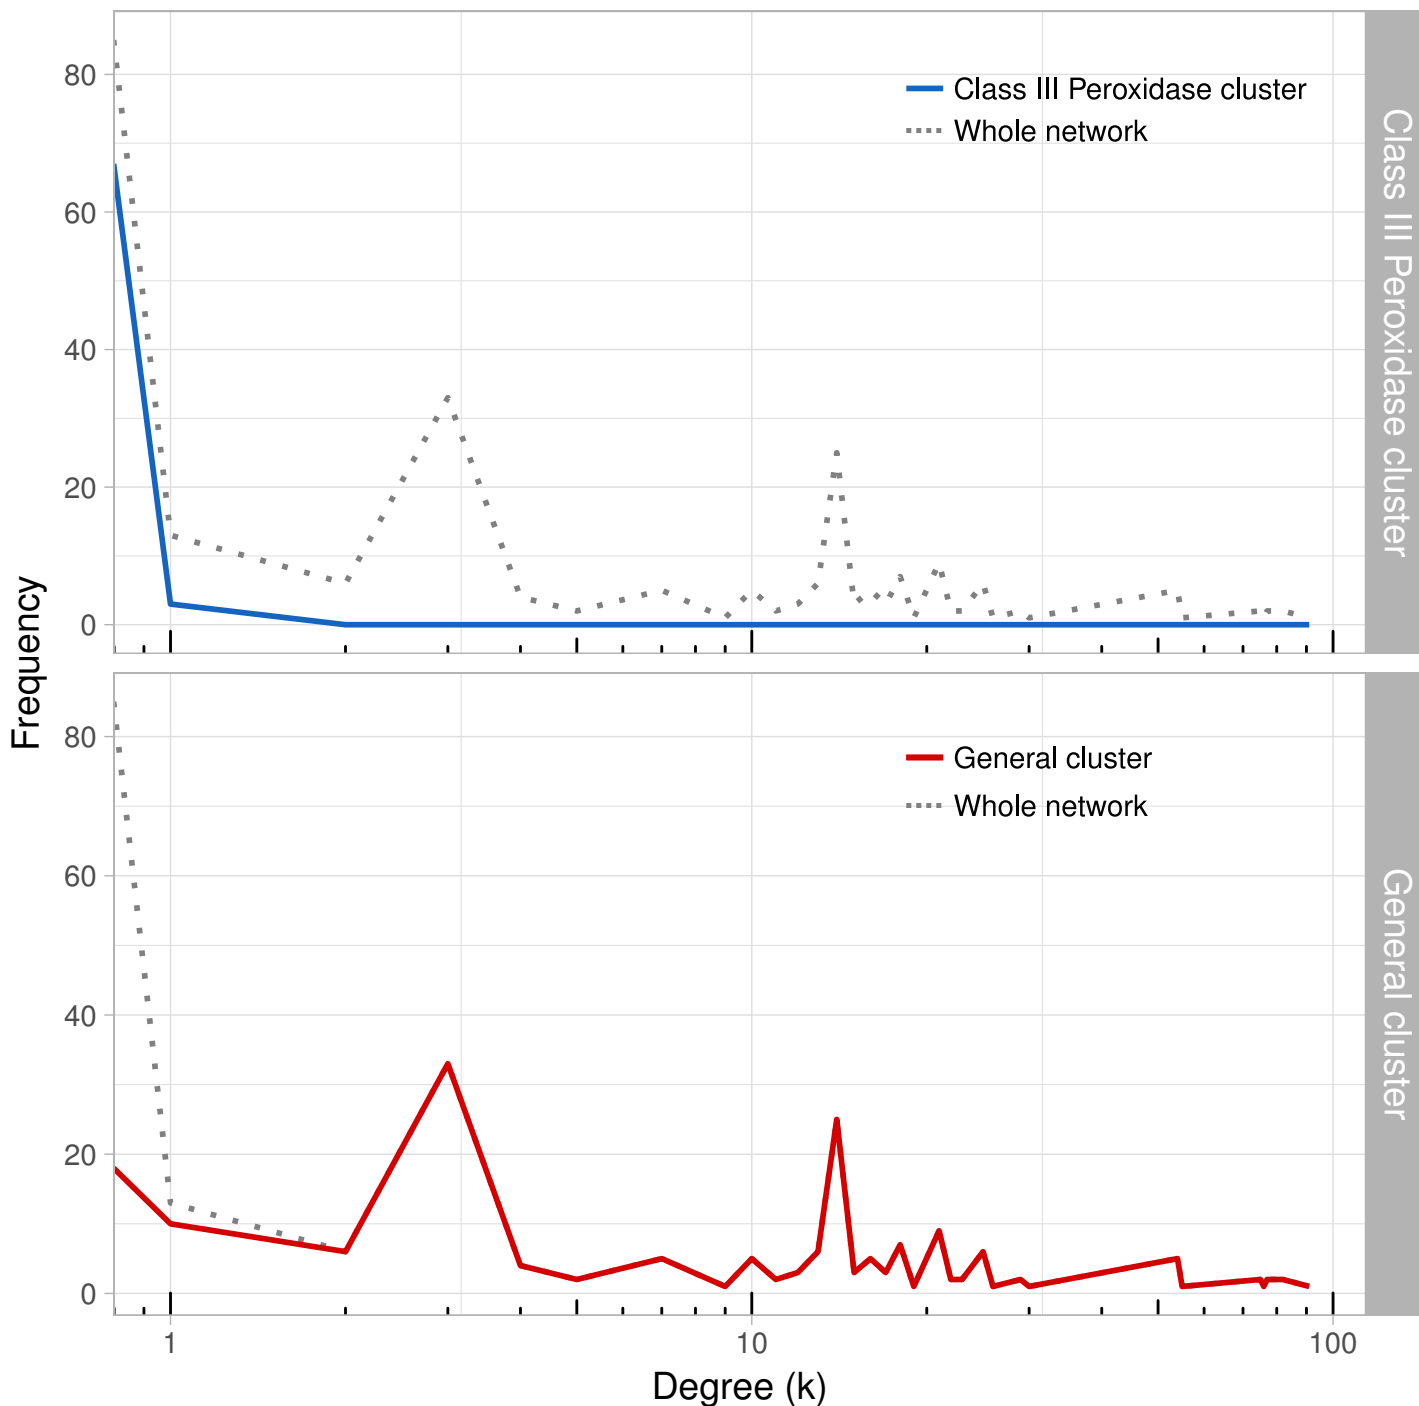

**Supplementary Figure S1:** Degree distribution of the network clusters, taking into account only protein-protein interaction. (a) Degree distribution of proteins from class III peroxidase cluster (red). Dotted lines shows degree distribution of whole network, disregarding chemical compounds. (b) Degree distribution (blue line) of proteins from general cluster. Dotted lines shows degree distribution of whole network, disregarding chemical compounds.

# Supplementa Figure S2

## a

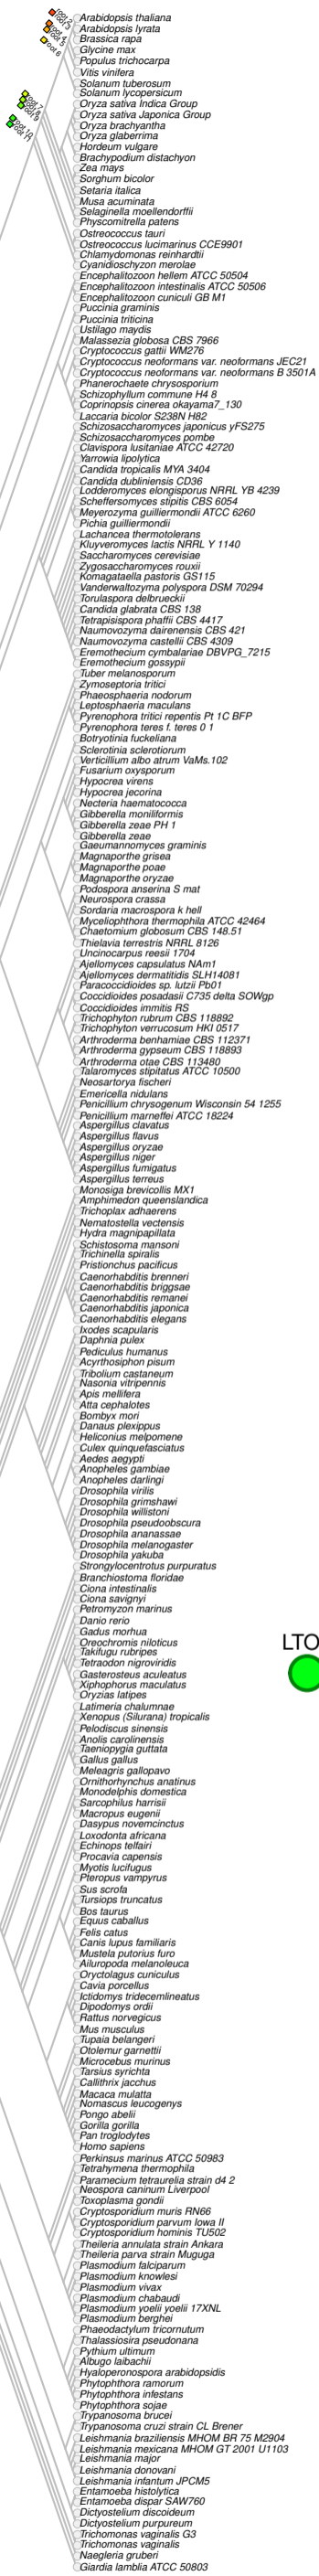

## b

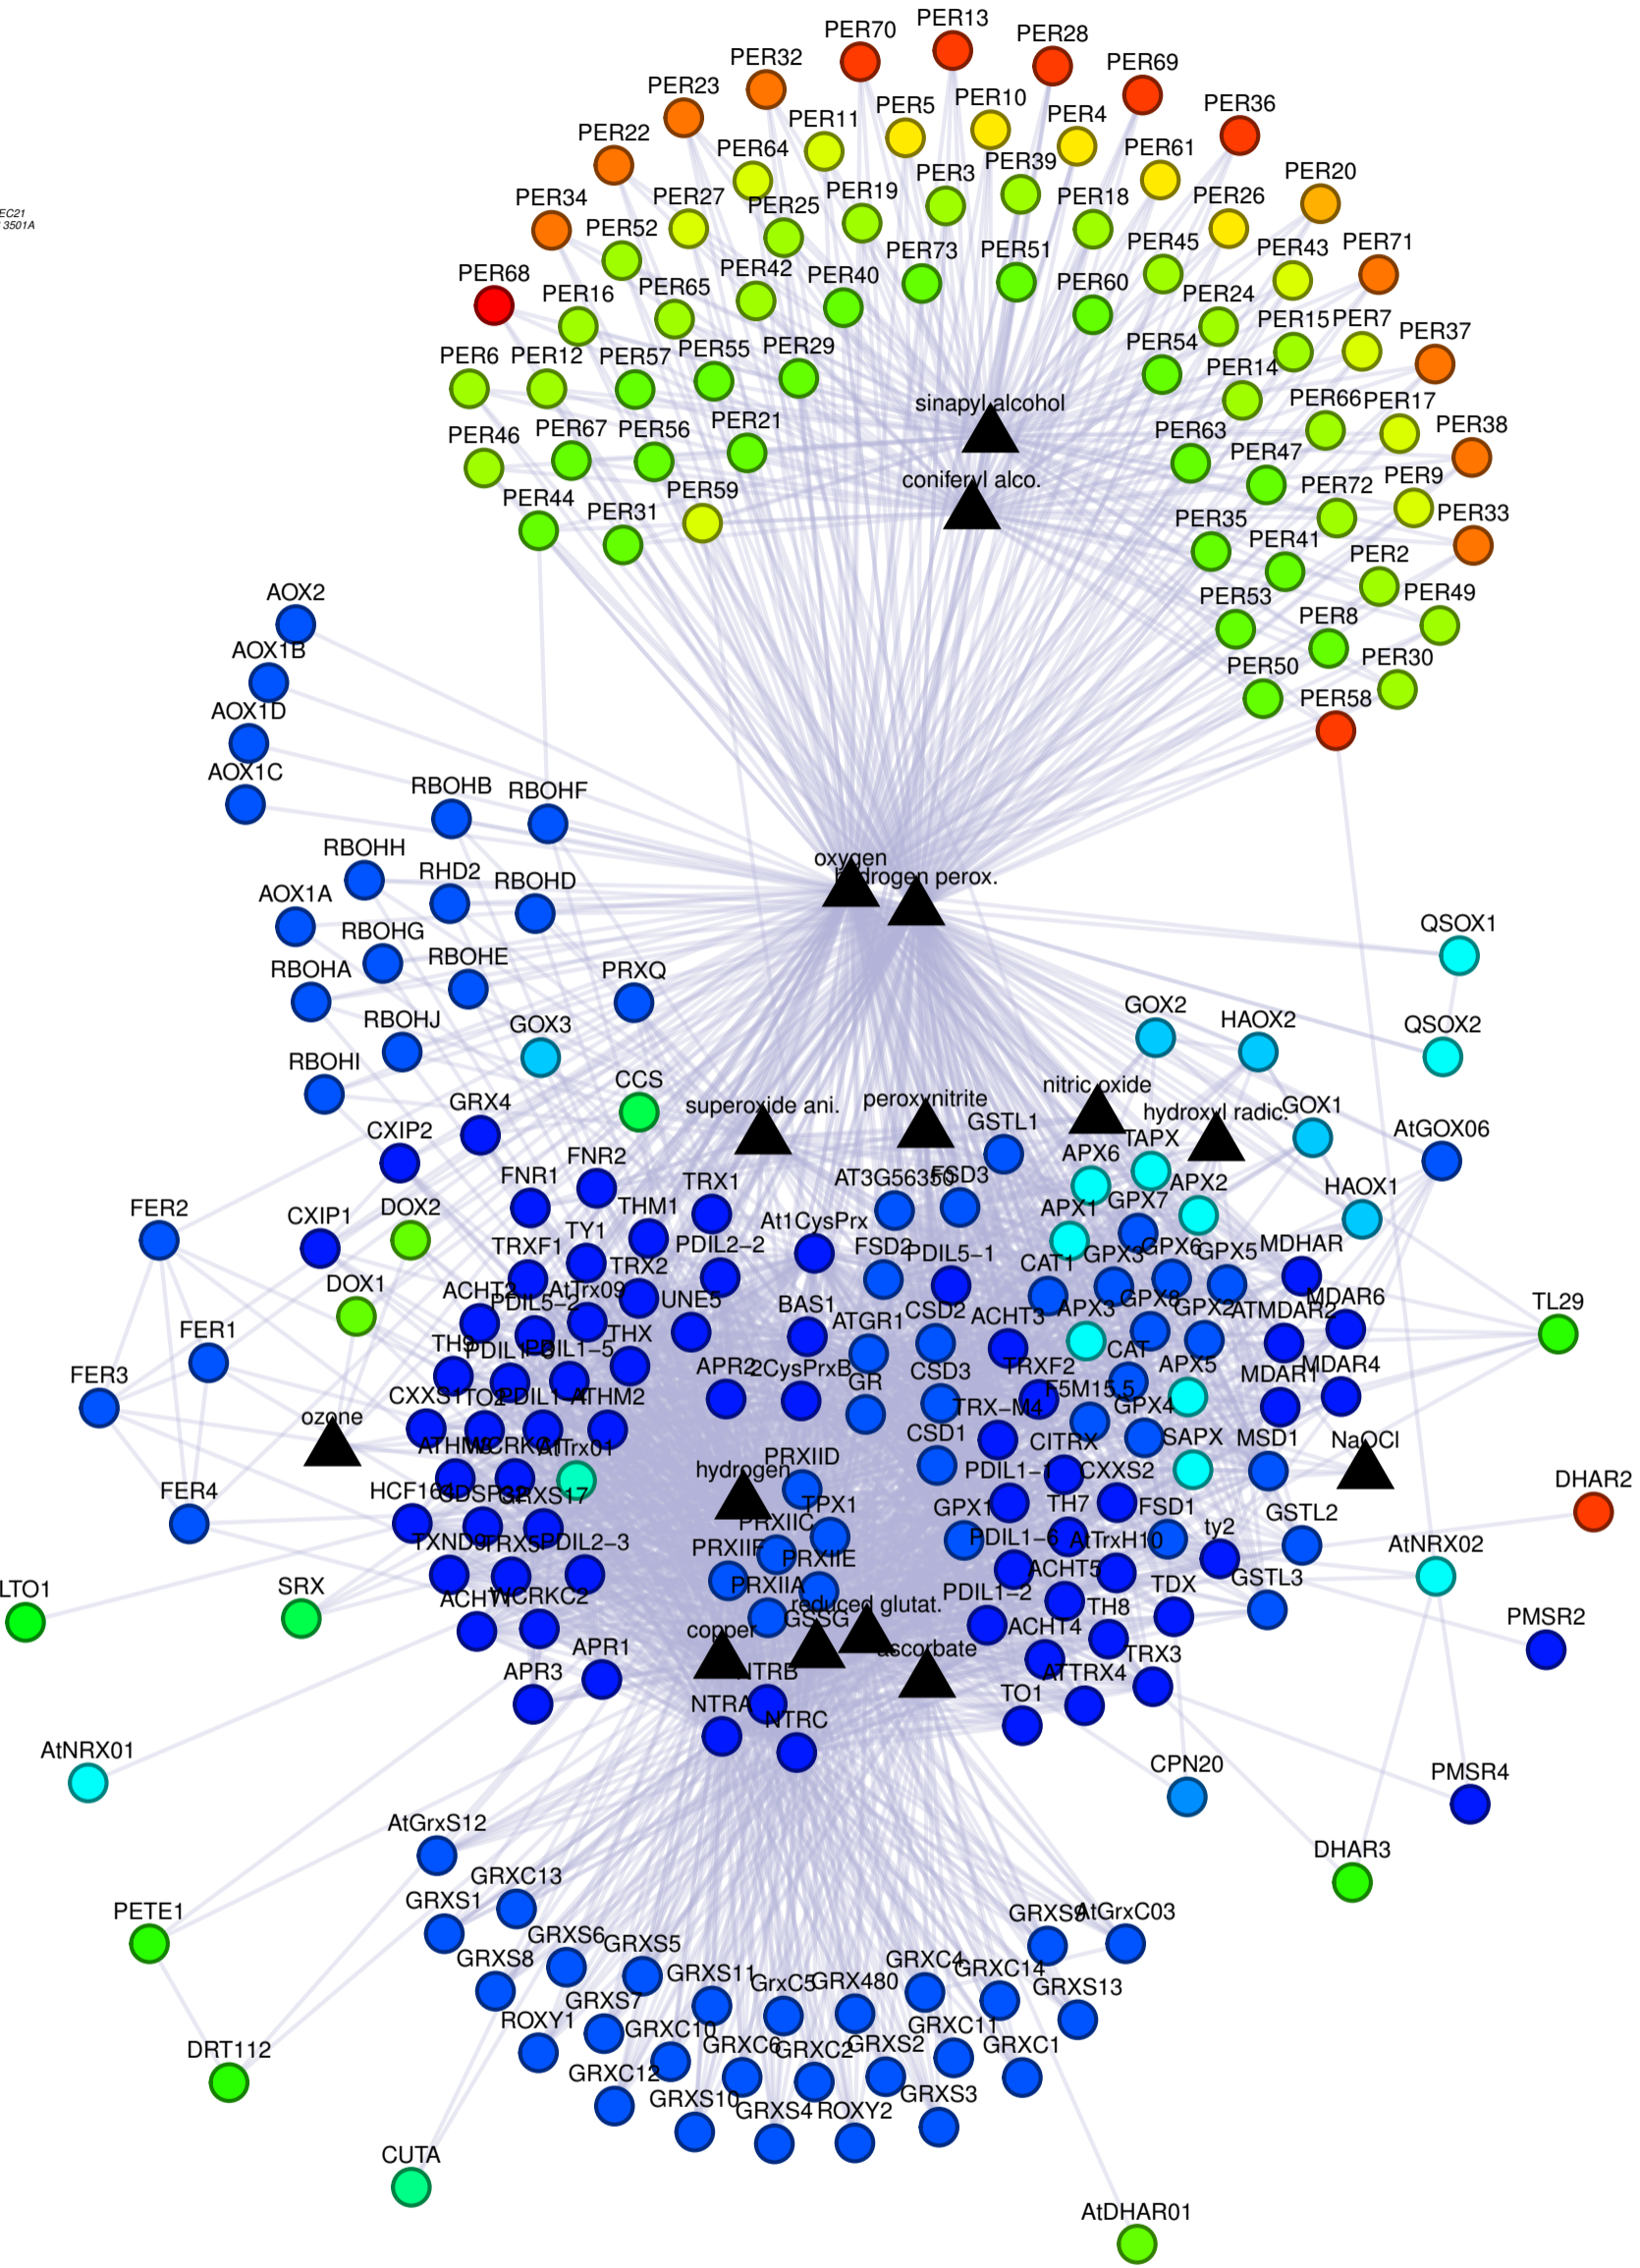

**Supplementary Figure S2:** Evolutionary scenario of Arabidopsis thaliana redox network. In (a) is depicted the eukaryote species tree from STRING v10.5. Each leaf node denotes an species and their phylogeny is drawn in the tree. Root nodes represents the last common ancestor (LCA) for each taxon. Colored diamonds aside each root node assign color for the network in (b). Supplementary Figure S2 (b) shows the same redox network, but with evolution scenario for all network nodes. Colors range from dark blue (more ancient) to dark orange (more recent). Red nodes have no annotation for evolutionary root.

# Supplementary Figure S3

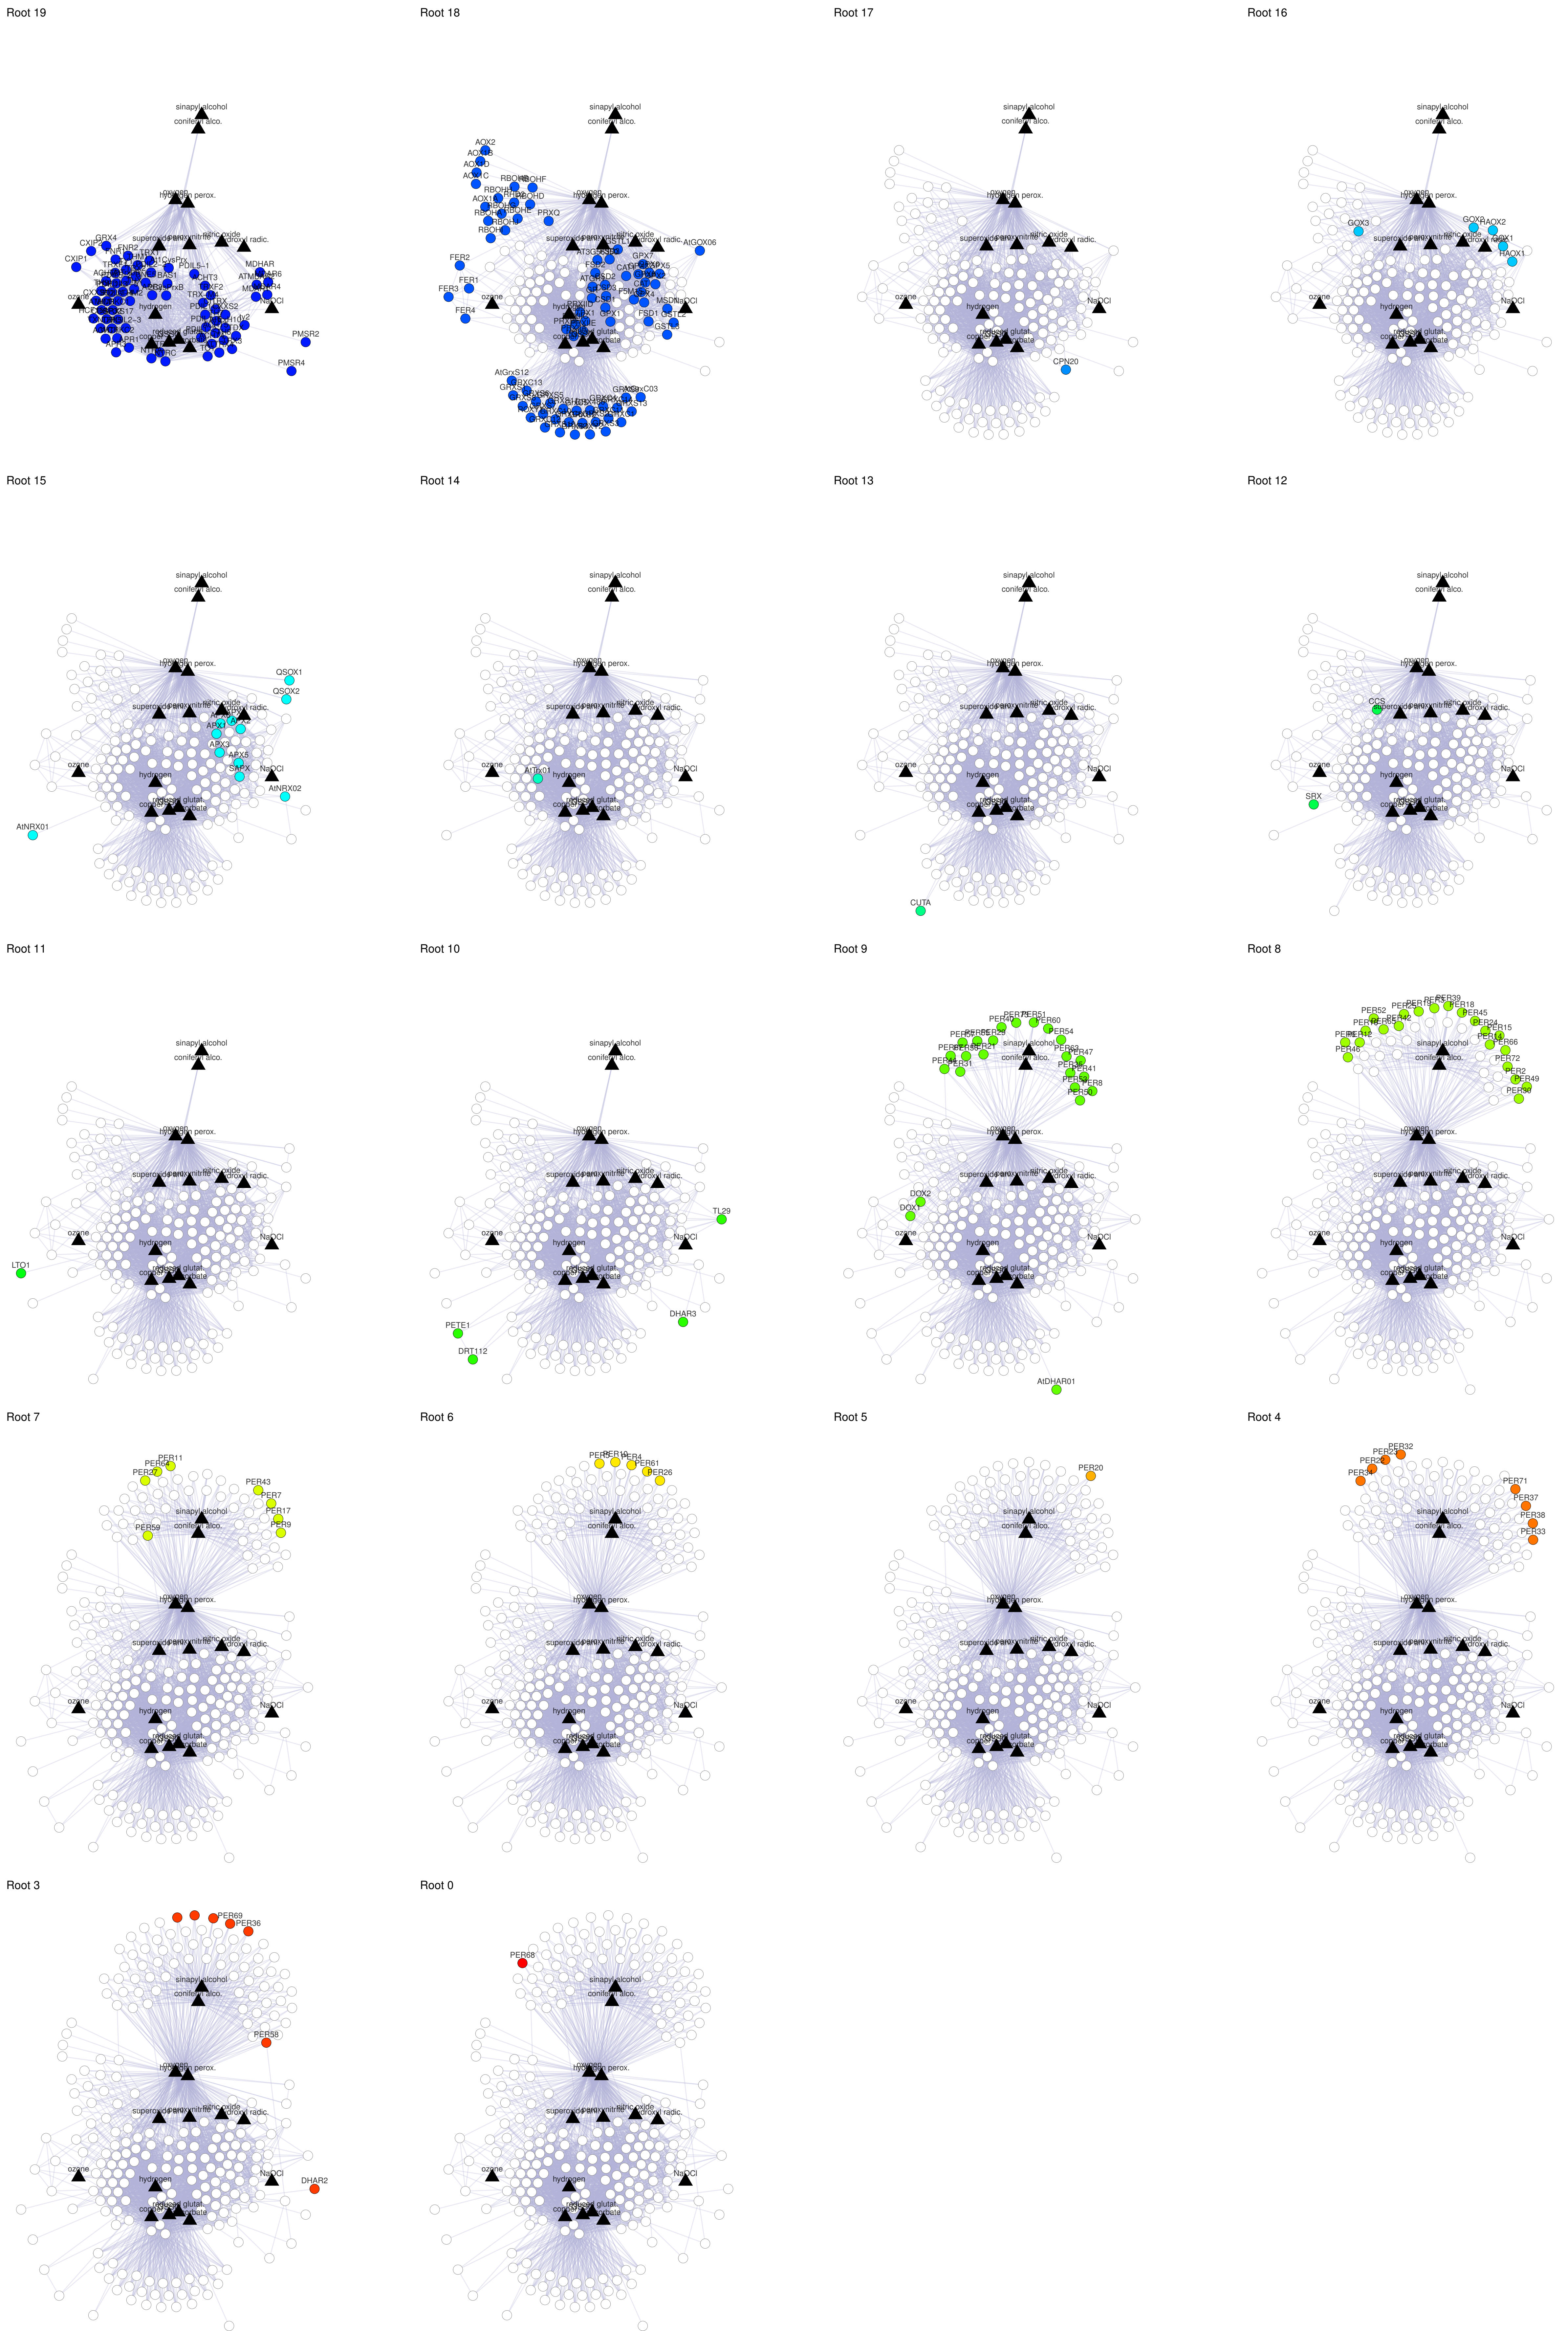

**Supplementary Figure S3:** Projection of evolutionary roots in the network. This figure shows how the redox network of *A. thaliana* have arisen and organized its connections. Network organization ranging from more ancient proteins (dark blue, root 19) to more recent proteins (root 3, dark orange). Red nodes have no annotation for evolutionary root, and therefore accounted for root 0.

# Supplementary Figure S4

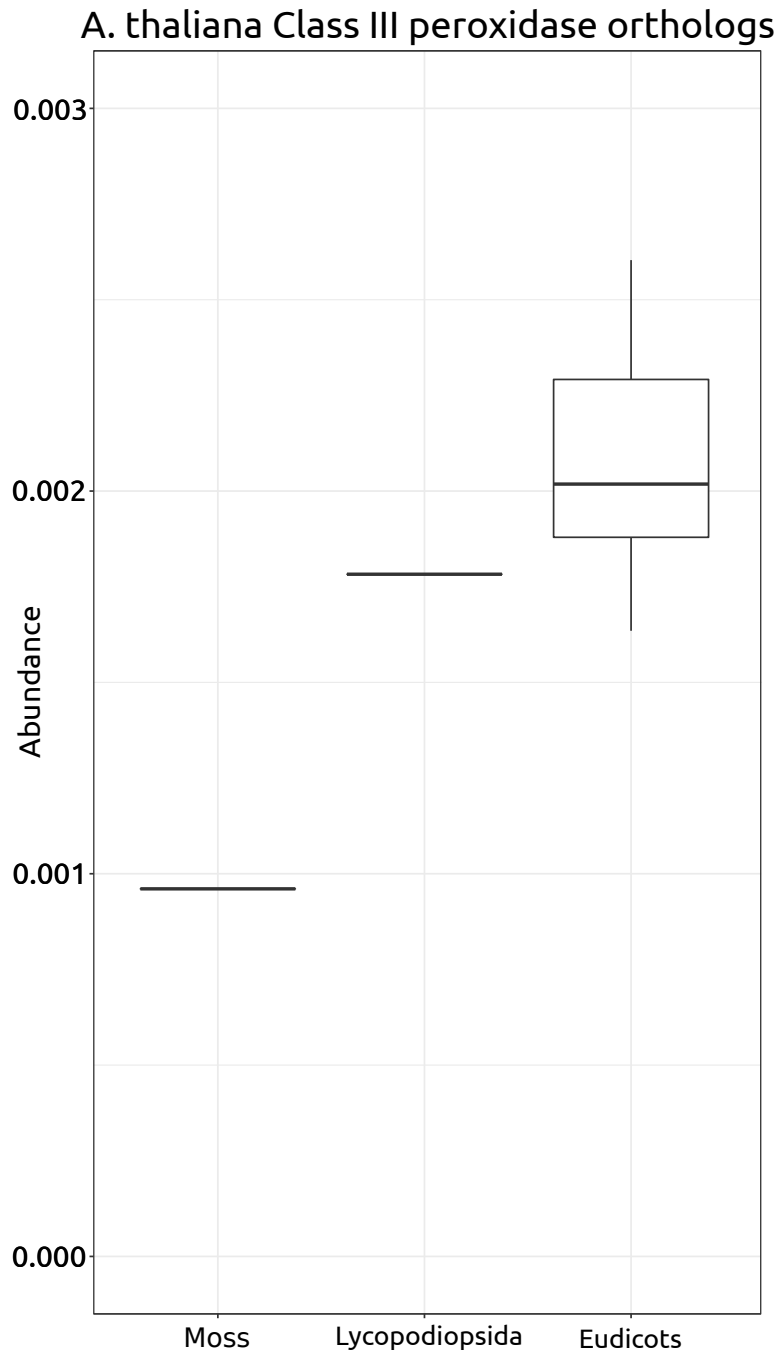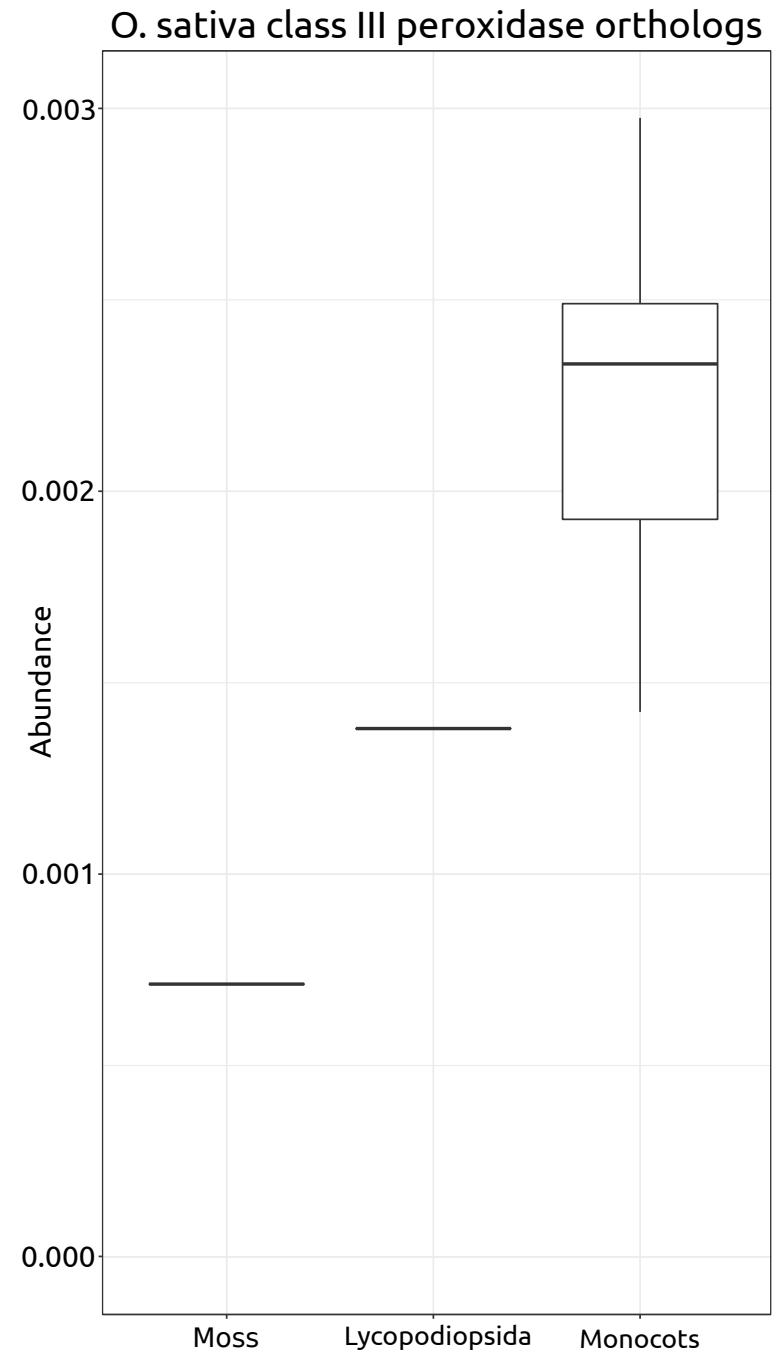

**Supplementary Figure S4:** Class III peroxidase abundance. (a) Shows a boxplot of the class III peroxidase abundance in each taxon analyzed. Eudicots were analyzed using orthologous groups obtained from STRING v10, using *A. thaliana* class III peroxidases as query. (b) Shows a boxplot of the class III peroxidase abundance in each taxon analyzed. Monocots were analyzed using orthologous groups obtained from STRING v10, using *O. sativa* class III peroxidases as query.

# Supplementary Figure S5

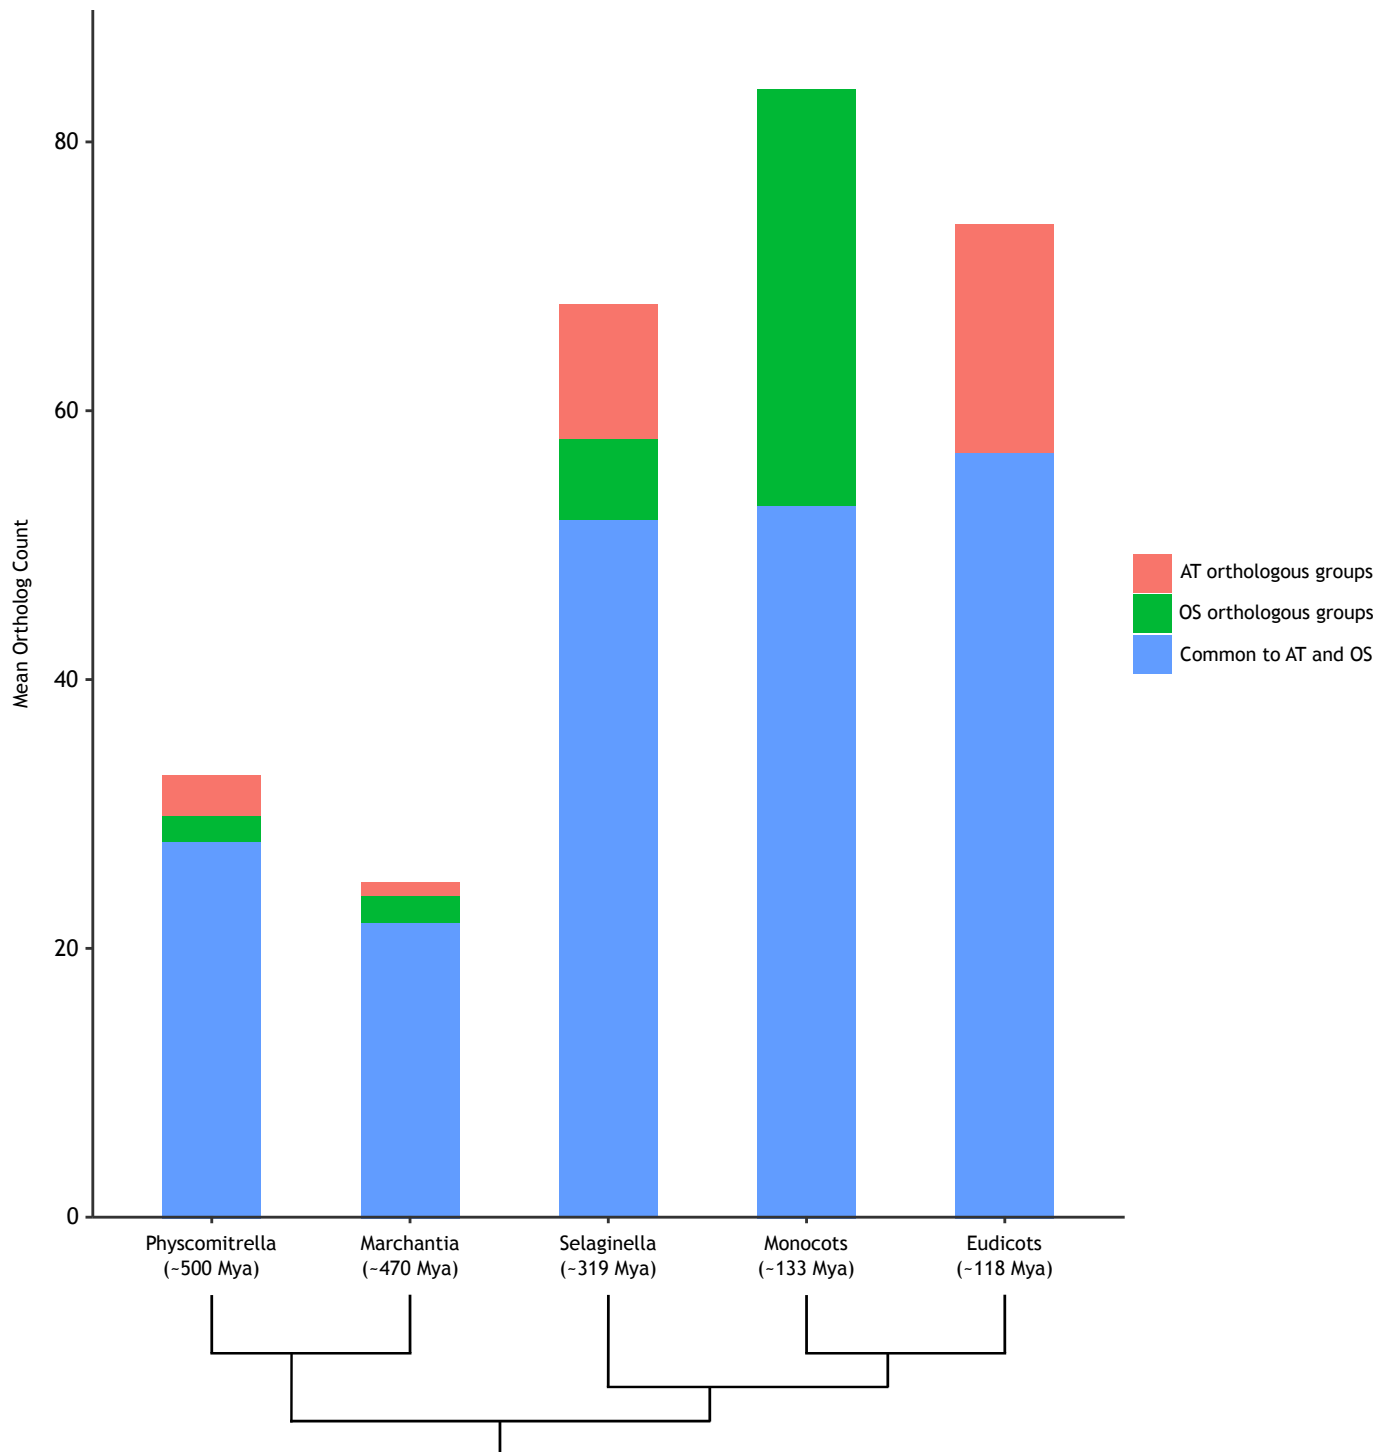

**Supplementary Figure S5:** Class III peroxidase orthologs abundance. Bars indicate the abundance of class III peroxidase isozymes by species of each taxonomic group (*Marchantia polymorpha*, *Physcomitrella patens*, *Selaginella moellendorffii*, Eudicots - 8 species, and Monocots - 10 species). Colors indicate whether the OG have *A. thaliana* orthologs (AT orthologous groups - pink), *O. sativa* orthologs (OS orthologous groups - green) or orthologs from both species (Common to AT and OS - blue). Dendrogram at the bottom shows the evolutionary relationship among the groups, and its estimated divergence times (in millions of years - Mya). Abundance is calculated as the mean of number of class III peroxidase orthologs divided by the gene count of each species.

# COG0175

- Arabidopsis thaliana
- Arabidopsis lyrata
- Brassica rapa
- Glycine max
- Populus trichocarpa
- Vitis vinifera
- Solanum tuberosum
- Solanum lycopersicum
- Oryza sativa Indica Group
- Oryza sativa Japonica Group
- Oryza brachyantha
- Oryza glaberrima
- Hordeum vulgare
- Brachypodium distachyon
- Zea mays
- Sorghum bicolor
- Setaria italica
- Musa acuminata
- Selaginella moellendorffii
- Physcomitrella patens
- Ostreococcus tauri
- Ostreococcus lucimarinus CCE9901
- Chlamydomonas reinhardtii
- Cyanidioschyzon merolae
- Encephalitozoon hellem ATCC 50504
- Encephalitozoon intestinalis ATCC 50506
- Encephalitozoon cuniculi GB M1
- Puccinia graminis
- Puccinia triticina
- Ustilago maydis
- Melassezia globosa CBS 7966
- Cryptococcus gattii WM276
- Cryptococcus neoformans var. neoformans JEC21
- Cryptococcus neoformans var. neoformans B 3501A
- Phanerochaete chrysosporium
- Schizophyllum commune H4 B
- Coprinopsis cinerea okayama7\_130
- Laccaria bicolor S238N H82
- Schizosaccharomyces japonicus yFS275
- Schizosaccharomyces pombe
- Clavospora lusitanae ATCC 42720
- Yarrowia lipolytica
- Candida tropicalis MYA 3404
- Candida dubliniensis CD36
- Lodderomyces elongisporus NRRL YB 4239
- Scheffersomyces stipitis CBS 6054
- Meyeromyza guilliermondii ATCC 6260
- Pichia guilliermondii
- Lachancea thermotolerans
- Kluyveromyces fragilis NRRL Y 1140
- Saccharomyces cerevisiae
- Zygosaccharomyces rouxii
- Komagataella pastoris GS115
- Vanderwaltozyma polyspora DSM 70294
- Torulopsis delbrueckii
- Candida glabrata CBS 138
- Tetrapispora phaffii CBS 4417
- Naumovozyma dairenensis CBS 421
- Naumovozyma castellii CBS 4309
- Eremothecium cymbalariae DBVPG\_7215
- Eremothecium gossypii
- Tuber melanosporum
- Zymoseptoria tritici
- Phaeosphaeria nodorum
- Leptosphaeria maculans
- Pyrenophora tritici repens Pt 1C BFP
- Pyrenophora teres f. teres 0 1
- Botryotinia fuckeliana
- Sclerotinia sclerotiorum
- Verticillium albo atrum VaMs.102
- Fusarium oxysporum
- Hypocrea virens
- Hypocrea jecorina
- Nectria haematococca
- Gibberella moniliformis
- Gibberella zeae PH 1
- Gibberella zeae
- Gaeumannomyces graminis
- Magnaporthe grisea
- Magnaporthe poae
- Magnaporthe oryzae
- Podospora anserina S mat
- Neurospora crassa
- Sordaria macrospora k hell
- Myceliophthora thermophila ATCC 42464
- Chaetomium globosum CBS 148.51
- Thielavia terrestris NRRL 8126
- Uncinocarpus reesii 1704
- Ajellomyces capsulatus Nam1
- Ajellomyces dermatitidis SLH14081
- Paracoccidioides sp. lutzi Pb01
- Coccidioides posadasii C735 delta SOWgp
- Coccidioides immitis RS
- Trichophyton rubrum CBS 118892
- Trichophyton verrucosum HKI 0517
- Arthroderma benhamiae CBS 112371
- Arthroderma gypseum CBS 118893
- Arthroderma otae CBS 113480
- Talaromyces stipitatus ATCC 10500
- Neosartorya fischeri
- Emericella nidulans
- Penicillium chrysogenum Wisconsin 54 1255
- Penicillium marneffei ATCC 18224
- Aspergillus clavatus
- Aspergillus flavus
- Aspergillus oryzae
- Aspergillus niger
- Aspergillus fumigatus
- Aspergillus terreus
- Monosiga brevicollis MX1
- Amphimedon queenslandica
- Trichoplax adhaerens
- Nematostella vectensis
- Hydra magnipapillata
- Schistosoma mansoni
- Trichiella spiralis
- Pristionchus pacificus
- Caenorhabditis brenneri
- Caenorhabditis briggsae
- Caenorhabditis remanei
- Caenorhabditis japonica
- Caenorhabditis elegans
- Drosophila melanogaster
- Drosophila yakuba
- Strongylocentrotus purpuratus
- Branchiostoma floridae
- Ciona intestinalis
- Ciona savignyi
- Petromyzon marinus
- Danio rerio
- Gadus morhua
- Oreochromis niloticus
- Takifugu rubripes
- Tetraodon nigroviridis
- Gasterosteus aculeatus
- Xiphophorus maculatus
- Oryzias latipes
- Latimeria chalumnae
- Xenopus (Silurana) tropicalis
- Pelodiscus sinensis
- Anolis carolinensis
- Taeniopygia guttata
- Gallus gallus
- Meleagris gallopavo
- Ornithorynchus anatinus
- Monodelphis domestica
- Sarcophilus harrisii
- Macropus eugenii
- Dasyurus novemcinctus
- Loxodonta africana
- Echirips telfairii
- Procavia capensis
- Myotis lucifugus
- Pteropus vampyrus
- Sus scrofa
- Tursiops truncatus
- Bos taurus
- Equus caballus
- Felis catus
- Canis lupus familiaris
- Mustela putorius furo
- Alluopoda melanoleuca
- Cryptolestes cuniculus
- Cavia porcellus
- Uctidomys tridecemlineatus
- Dipodomys ordii
- Rattus norvegicus
- Mus musculus
- Tupaia belangeri
- Otolomus garretti
- Microcebus murinus
- Tarsius syrichta
- Callithrix jacchus
- Macaca mulatta
- Nomascus leucogenys
- Pongo abelii
- Gorilla gorilla
- Pan troglodytes
- Homo sapiens
- Perkinsus marinus ATCC 50983
- Tetrahymena thermophila
- Paramecium tetraurelia strain d4 2
- Neospora caninum Liverpool
- Toxoplasma gondii
- Cryptosporidium muris RN66
- Cryptosporidium parvum Iowa II
- Cryptosporidium hominis TU502
- Theileria annulata strain Ankara
- Theileria parva strain Muguga
- Plasmodium falciparum
- Plasmodium knowlesi
- Plasmodium vivax
- Plasmodium chabaudi
- Plasmodium yoelii yoelii 17XNL
- Plasmodium berghei
- Phaeodactylum tricornutum
- Thalassiosira pseudonana
- Pythium ultimum
- Albugo liliaceae
- Hyaloperonospora arabidopsidis
- Phytophthora ramorum
- Phytophthora infestans
- Phytophthora sojae
- Trypanosoma brucei
- Trypanosoma cruzi strain CL Brener
- Leishmania braziliensis MHOM BR 75 M2904
- Leishmania mexicana MHOM GT 2001 U1103
- Leishmania major
- Leishmania donovani
- Leishmania infantum JPCM5
- Entamoeba histolytica
- Entamoeba dispar SAW760
- Dicystostellum discoideum
- Dicystostellum purpureum
- Trichomonas vaginalis G3
- Trichomonas vaginalis
- Naegleria gruberi
- Giardia lamblia ATCC 50803

- OG presence
- OG absence
- ◊ Inferred root

Dscore = 0.917

Pvalue = 2.86e-07

AdjPvalue = 3.40e-05

# COG0225

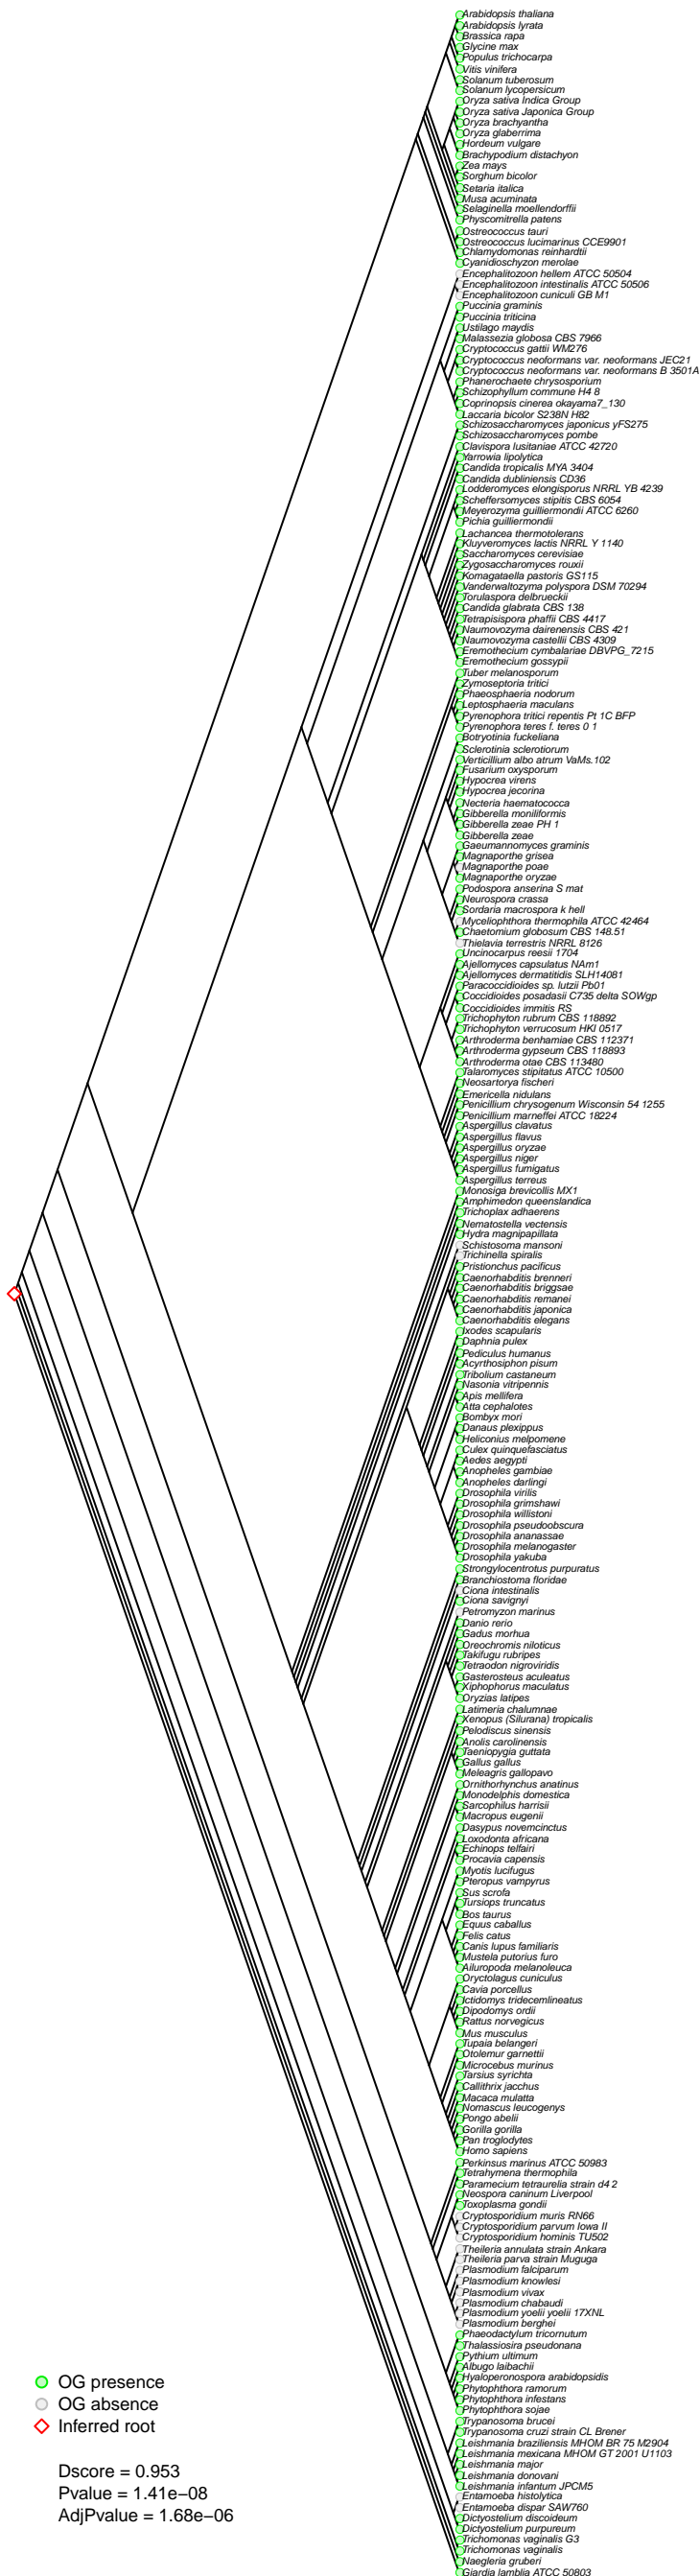

# COG0234

- Arabidopsis thaliana
- Arabidopsis lyrata
- Brassica rapa
- Glycine max
- Populus trichocarpa
- Vitis vinifera
- Solanum tuberosum
- Solanum lycopersicum
- Oryza sativa Indica Group
- Oryza sativa Japonica Group
- Oryza brachyantha
- Oryza glaberrima
- Hordeum vulgare
- Brachypodium distachyon
- Zea mays
- Sorghum bicolor
- Setaria italica
- Musa acuminata
- Selaginella moellendorffii
- Physcomitrella patens
- Ostreococcus tauri
- Ostreococcus lucimarinus CCE9901
- Chlamydomonas reinhardtii
- Cyanidioschyzon merolae
- Encephalitozoon hellem ATCC 50504
- Encephalitozoon intestinalis ATCC 50506
- Encephalitozoon cuniculi GB M1
- Puccinia graminis
- Puccinia triticina
- Ustilago maydis
- Malassezia globosa CBS 7966
- Cryptococcus gattii WM276
- Cryptococcus neoformans var. neoformans JEC21
- Cryptococcus neoformans var. neoformans B 3501A
- Phanerochaete chrysosporium
- Schizophyllum commune H4 B
- Coprinopsis cinerea okayama7\_130
- Laccaria bicolor S238N H82
- Schizosaccharomyces japonicus yFS275
- Schizosaccharomyces pombe
- Clavospora lusitanae ATCC 42720
- Yarrowia lipolytica
- Candida tropicalis MYA 3404
- Candida dubliniensis CD36
- Lodderomyces elongisporus NRRL YB 4239
- Scheffersomyces stipitis CBS 6054
- Meyeromyza guilliermondii ATCC 6260
- Pichia guilliermondii
- Lachancea thermotolerans
- Kluyveromyces fragilis NRRL Y 1140
- Saccharomyces cerevisiae
- Zygosaccharomyces rouxii
- Komagataella pastoris GS115
- Vanderwaltozyma polyspora DSM 70294
- Torulaspora delbrueckii
- Candida glabrata CBS 138
- Tetrapispora phaffii CBS 4417
- Naumovozyma dairensis CBS 421
- Naumovozyma castellii CBS 4309
- Eremothecium cymbalariae DBVPG\_7215
- Eremothecium gossypii
- Tuber melanosporum
- Zygomycetozia tritici
- Phaeosphaeria nodorum
- Leptosphaeria maculans
- Pyrenophora tritici repens Pt 1C BFP
- Pyrenophora teres f. teres 0 1
- Botryotinia fuckeliana
- Sclerotinia sclerotiorum
- Verticillium albo atrum VaMs.102
- Fusarium oxysporum
- Hypocrea virens
- Hypocrea jecorina
- Nectria haematococca
- Gibberella moniliformis
- Gibberella zeae PH 1
- Gibberella zeae
- Gaeumannomyces graminis
- Magnaporthe grisea
- Magnaporthe poae
- Magnaporthe oryzae
- Podospora anserina S mat
- Neurospora crassa
- Sordaria macrospora k hell
- Myceliophthora thermophila ATCC 42464
- Chaetomium globosum CBS 148.51
- Thielavia terrestris NRRL 8126
- Uncinocarpus reesii 1704
- Ajellomyces capsulatus Nam1
- Ajellomyces dermatitidis SLH14081
- Paracoccidioides sp. lutzi Pb01
- Coccidioides posadasii C735 delta SOWgp
- Coccidioides immitis RS
- Trichophyton rubrum CBS 118892
- Trichophyton verrucosum HKI 0517
- Arthroderma benhamiae CBS 112371
- Arthroderma gypseum CBS 118893
- Arthroderma otae CBS 113480
- Talaromyces stipitatus ATCC 10500
- Neosartorya fischeri
- Emericella nidulans
- Penicillium chrysogenum Wisconsin 54 1255
- Penicillium marneffei ATCC 18224
- Aspergillus clavatus
- Aspergillus flavus
- Aspergillus oryzae
- Aspergillus niger
- Aspergillus fumigatus
- Aspergillus terreus
- Monosiga brevicollis MX1
- Amphimedon queenslandica
- Trichoplax adhaerens
- Nematostella vectensis
- Hydra magnipapillata
- Schistosoma mansoni
- Trichiella spiralis
- Pristionchus pacificus
- Caenorhabditis brenneri
- Caenorhabditis briggsae
- Caenorhabditis remanei
- Caenorhabditis japonica
- Caenorhabditis elegans
- Nodds scapularis
- Daphnia pulex
- Pediculus humanus
- Acyrthosiphon pisum
- Tribolium castaneum
- Nasonia vitripennis
- Apis mellifera
- Atta cephalotes
- Bombyx mori
- Danaus plexippus
- Heliconia melpomene
- Culex quinquefasciatus
- Aedes aegypti
- Anopheles gambiae
- Anopheles darlingi
- Drosophila virilis
- Drosophila grimshawi
- Drosophila willistoni
- Drosophila pseudoobscura
- Drosophila ananassae
- Drosophila melanogaster
- Drosophila yakuba
- Strongylocentrotus purpuratus
- Branchiostoma floridae
- Ciona intestinalis
- Ciona savignyi
- Petromyzon marinus
- Danio rerio
- Gadus morhua
- Oreochromis niloticus
- Takifugu rubripes
- Tetraodon nigroviridis
- Gasterosteus aculeatus
- Xiphophorus maculatus
- Dryzius latipes
- Latimeria chalumnae
- Xenopus (Silurana) tropicalis
- Pelodiscus sinensis
- Anolis carolinensis
- Taeniopygia guttata
- Gallus gallus
- Meleagris gallopavo
- Ornithorhynchus anatinus
- Monodelphis domestica
- Sarcophilus harrisii
- Macropus eugenii
- Dasyurus novemcinctus
- Loxodonta africana
- Echinops telfairii
- Procavia capensis
- Myotis lucifugus
- Pteropus vampyrus
- Sus scrofa
- Turdus truncatus
- Bos taurus
- Equus caballus
- Felis catus
- Canis lupus familiaris
- Mustela putorius furo
- Alluopoda melanoleuca
- Cryptolegus cuniculus
- Cavia porcellus
- Ictidomys tridecemlineatus
- Dipodomys ordii
- Rattus norvegicus
- Mus musculus
- Tupia belangerii
- Otolomus garrettii
- Microcebus murinus
- Tarsius syrichta
- Callithrix jacchus
- Macaca mulatta
- Nomascus leucogenys
- Pongo abelii
- Gorilla gorilla
- Pan troglodytes
- Homo sapiens
- Perkinsus marinus ATCC 50983
- Tetrahymena thermophila
- Paramecium tetraurelia strain d4 2
- Neospora caninum Liverpool
- Toxoplasma gondii
- Cryptosporidium muris RN66
- Cryptosporidium parvum Iowa II
- Cryptosporidium hominis TU502
- Theileria annulata strain Ankara
- Theileria parva strain Muguga
- Plasmodium falciparum
- Plasmodium knowlesi
- Plasmodium vivax
- Plasmodium chabaudi
- Plasmodium yoelii yoelii 17XNL
- Plasmodium berghei
- Phaeodactylum tricornutum
- Thalassiosira pseudonana
- Pythium ultimum
- Albigo lalibachii
- Hyaloperonospora arabidopsidis
- Phytophthora ramorum
- Phytophthora infestans
- Phytophthora sojae
- Trypanosoma brucei
- Trypanosoma cruzi strain CL Brener
- Leishmania braziliensis MHOM BR 75 M2904
- Leishmania mexicana MHOM GT 2001 U1103
- Leishmania major
- Leishmania donovani
- Leishmania infantum JPCM5
- Entamoeba histolytica
- Entamoeba dispar SAW760
- Dictyostellium discoideum
- Dictyostellium purpureum
- Trichomonas vaginalis G3
- Trichomonas vaginalis
- Naegleria gruberi
- Giardia lamblia ATCC 50803

- OG presence
- OG absence
- ◆ Inferred root

Dscore = 0.976  
Pvalue = 2.91e-07  
AdjPvalue = 3.46e-05



# COG0278

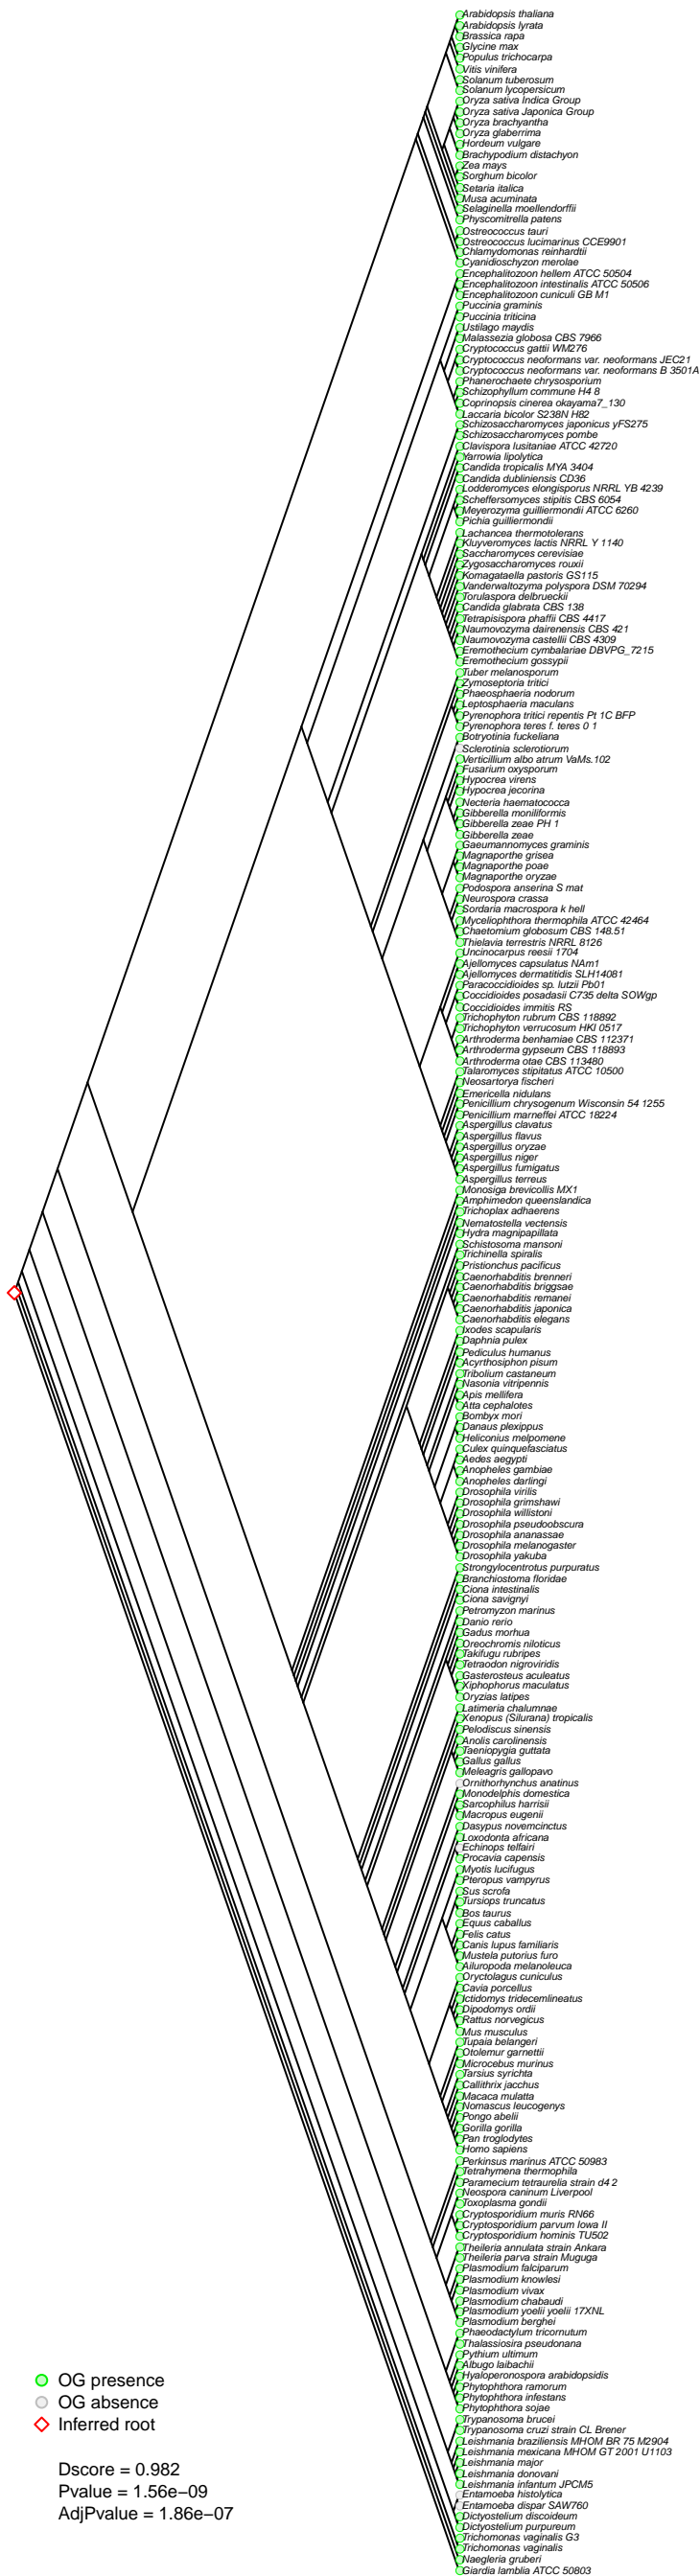

# COG0369

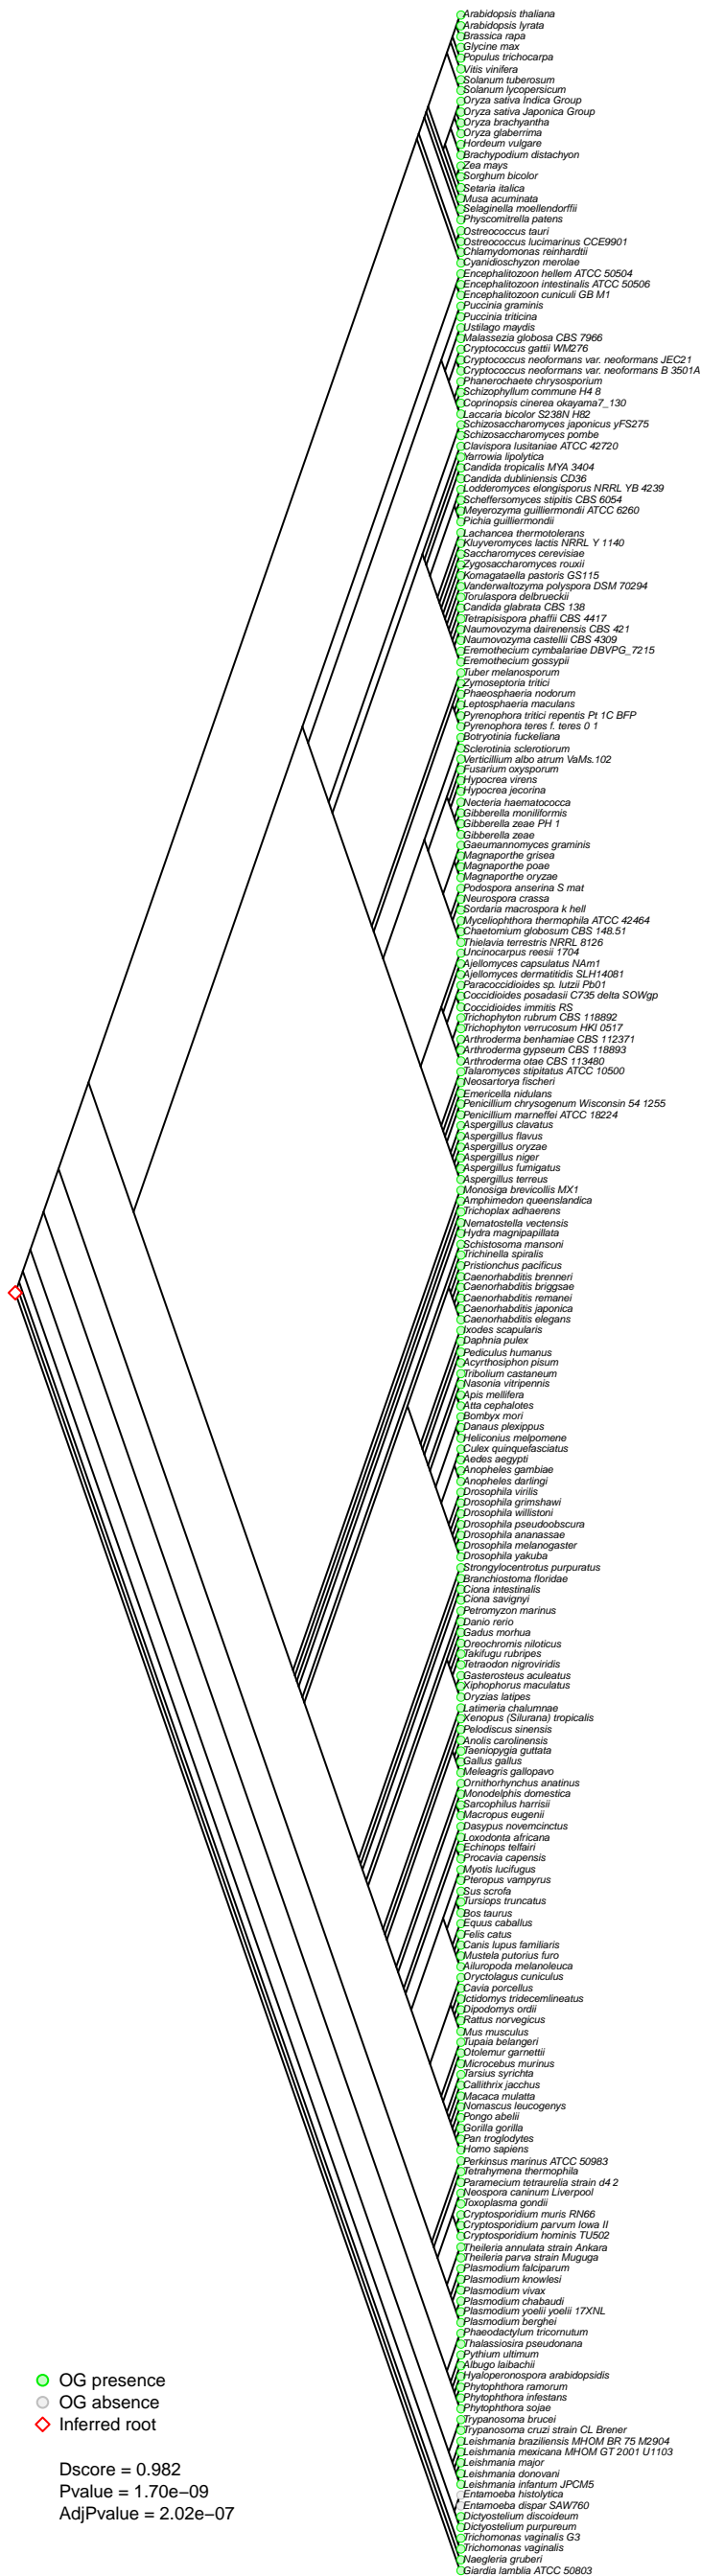

# COG0376

- Arabidopsis thaliana
- Arabidopsis lyrata
- Brassica rapa
- Glycine max
- Populus trichocarpa
- Vitis vinifera
- Solanum tuberosum
- Solanum lycopersicum
- Oryza sativa Indica Group
- Oryza sativa Japonica Group
- Oryza brachyantha
- Oryza glaberrima
- Hordeum vulgare
- Brachypodium distachyon
- Zea mays
- Sorghum bicolor
- Setaria italica
- Musa acuminata
- Selaginella moellendorffii
- Physcomitrella patens
- Ostreococcus tauri
- Ostreococcus lucimarinus CCE9901
- Chlamydomonas reinhardtii
- Cyanidioschyzon merolae
- Encephalitozoon hellem ATCC 50504
- Encephalitozoon intestinalis ATCC 50506
- Encephalitozoon cuniculi GB M1
- Puccinia graminis
- Puccinia triticina
- Ustilago maydis
- Melassezia globosa CBS 7966
- Cryptococcus gattii WM276
- Cryptococcus neoformans var. neoformans JEC21
- Cryptococcus neoformans var. neoformans B 3501A
- Phanerochaete chrysosporium
- Schizophyllum commune H4 B
- Coprinopsis cinerea okayama7\_130
- Laccaria bicolor S238N H82
- Schizosaccharomyces japonicus yFS275
- Schizosaccharomyces pombe
- Clavospora lusitanae ATCC 42720
- Yarrowia lipolytica
- Candida tropicalis MYA 3404
- Candida dubliniensis CD36
- Lodderomyces elongisporus NRRL YB 4239
- Scheffersomyces stipitis CBS 6054
- Meyeromyza guilliermondii ATCC 6260
- Pichia guilliermondii
- Lachancea thermotolerans
- Kluyveromyces fragilis NRRL Y 1140
- Saccharomyces cerevisiae
- Zygosaccharomyces rouxii
- Komagataella pastoris GS115
- Vanderwaltozyma polyspora DSM 70294
- Torulaspora delbrueckii
- Candida glabrata CBS 138
- Tetrapispora phaffii CBS 4417
- Naumovozyma dairensis CBS 421
- Naumovozyma castellii CBS 4309
- Eremothecium cymbalariae DBVPG\_7215
- Eremothecium gossypii
- Tuber melanosporum
- Zyoseptoria tritici
- Phaeosphaeria nodorum
- Leptosphaeria maculans
- Pyrenophora tritici repens Pt 1C BFP
- Pyrenophora teres f. teres 0 1
- Botryotinia fuckeliana
- Sclerotinia sclerotiorum
- Verticillium albo atrum VaMs.102
- Fusarium oxysporum
- Hypocrea virens
- Hypocrea jecorina
- Nectria haematococca
- Gibberella moniliformis
- Gibberella zeae PH 1
- Gibberella zeae
- Gaeumannomyces graminis
- Magnaporthe grisea
- Magnaporthe poae
- Magnaporthe oryzae
- Podospora anserina S mat
- Neurospora crassa
- Sordaria macrospora k hell
- Myceliophthora thermophila ATCC 42464
- Chaetomium globosum CBS 148.51
- Thielavia terrestris NRRL 8126
- Uncinocarpus reesii 1704
- Ajellomyces capsulatus Nam1
- Ajellomyces dermatitidis SLH14081
- Paracoccidioides sp. lutzi Pb01
- Coccidioides posadasii C735 delta SOWgp
- Coccidioides immitis RS
- Trichophyton rubrum CBS 118892
- Trichophyton verrucosum HKI 0517
- Arthroderma benhamiae CBS 112371
- Arthroderma gypseum CBS 118893
- Arthroderma otae CBS 113480
- Talaromyces stipitatus ATCC 10500
- Neosartorya fischeri
- Emericella nidulans
- Penicillium chrysogenum Wisconsin 54 1255
- Penicillium marneffei ATCC 18224
- Aspergillus clavatus
- Aspergillus flavus
- Aspergillus oryzae
- Aspergillus niger
- Aspergillus fumigatus
- Aspergillus terreus
- Monosiga brevicollis MX1
- Amphimedon queenslandica
- Trichoplax adhaerens
- Nematostella vectensis
- Hydra magnipapillata
- Schistosoma mansoni
- Trichiella spiralis
- Pristionchus pacificus
- Caenorhabditis brenneri
- Caenorhabditis briggsae
- Caenorhabditis remanei
- Caenorhabditis japonica
- Caenorhabditis elegans
- Ixodes scapularis
- Daphnia pulex
- Pediculus humanus
- Acyrthosiphon pisum
- Tribolium castaneum
- Nasonia vitripennis
- Apis mellifera
- Atta cephalotes
- Bombyx mori
- Danaus plexippus
- Heliconia melpomene
- Culex quinquefasciatus
- Aedes aegypti
- Anopheles gambiae
- Anopheles darlingi
- Drosophila virilis
- Drosophila grimshawi
- Drosophila willistoni
- Drosophila pseudoobscura
- Drosophila ananassae
- Drosophila melanogaster
- Drosophila yakuba
- Strongylocentrotus purpuratus
- Branchiostoma floridae
- Ciona intestinalis
- Ciona savignyi
- Petromyzon marinus
- Danio rerio
- Gadus morhua
- Oreochromis niloticus
- Takifugu rubripes
- Tetraodon nigroviridis
- Gasterosteus aculeatus
- Xiphophorus maculatus
- Oryzias latipes
- Latimeria chalumnae
- Xenopus (Silurana) tropicalis
- Pelodiscus sinensis
- Anolis carolinensis
- Taeniopygia guttata
- Gallus gallus
- Meleagris gallopavo
- Ornithorhynchus anatinus
- Monodelphis domestica
- Sarcophilus harrisii
- Macropus eugenii
- Dasyurus novemcinctus
- Loxodonta africana
- Echinops telfairii
- Procavia capensis
- Myotis lucifugus
- Pteropus vampyrus
- Sus scrofa
- Tursiops truncatus
- Bos taurus
- Equus caballus
- Felis catus
- Canis lupus familiaris
- Mustela putorius furo
- Alluopoda melanoleuca
- Cryptolegus cuniculus
- Cavia porcellus
- Ictidomys tridecemlineatus
- Dipodomys ordii
- Rattus norvegicus
- Mus musculus
- Tupia belangeri
- Otolomus garrettii
- Microcebus murinus
- Tarsius syrichta
- Callithrix jacchus
- Macaca mulatta
- Nomascus leucogenys
- Pongo abelii
- Gorilla gorilla
- Pan troglodytes
- Homo sapiens
- Perkinus marinus ATCC 50983
- Tetrahymena thermophila
- Paramecium tetraurelia strain d4 2
- Neospora caninum Liverpool
- Toxoplasma gondii
- Cryptosporidium muris RN66
- Cryptosporidium parvum Iowa II
- Cryptosporidium hominis TU502
- Theileria annulata strain Ankara
- Theileria parva strain Muguga
- Plasmodium falciparum
- Plasmodium knowlesi
- Plasmodium vivax
- Plasmodium chabaudi
- Plasmodium yoelii yoelii 17XNL
- Plasmodium berghei
- Phaeodactylum tricorutum
- Thalassiosira pseudonana
- Pythium ultimum
- Albugo falabachii
- Hyaloperonospora arabidopsidis
- Phytophthora ramorum
- Phytophthora infestans
- Phytophthora sojae
- Trypanosoma brucei
- Trypanosoma cruzi strain CL Brener
- Leishmania braziliensis MHOM BR 75 M2904
- Leishmania mexicana MHOM GT 2001 U1103
- Leishmania major
- Leishmania donovani
- Leishmania infantum JPCM5
- Entamoeba histolytica
- Entamoeba dispar SAW760
- Dictyostellium discoideum
- Dictyostellium purpureum
- Trichomonas vaginalis G3
- Trichomonas vaginalis
- Naegleria gruberi
- Giardia lamblia ATCC 50803

- OG presence
- OG absence
- ◇ Inferred root

Dscore = 0.918  
Pvalue = 1.69e-05  
AdjPvalue = 2.02e-03

# COG0386

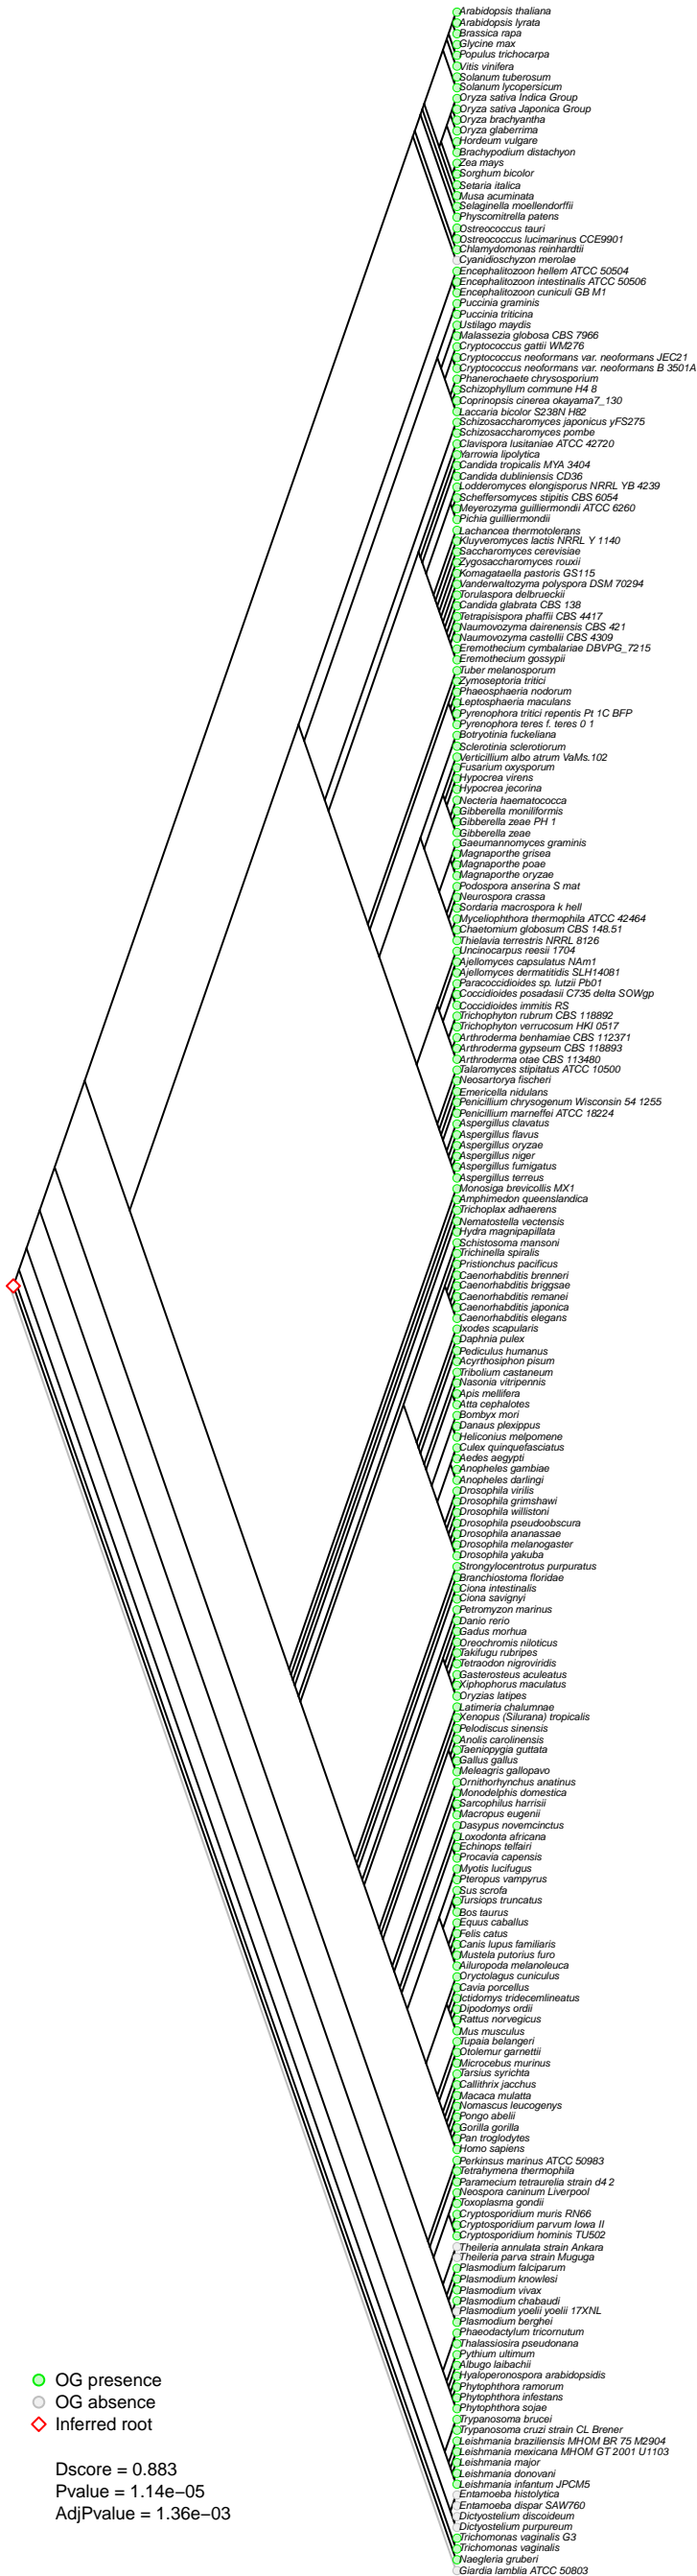

# COG0446

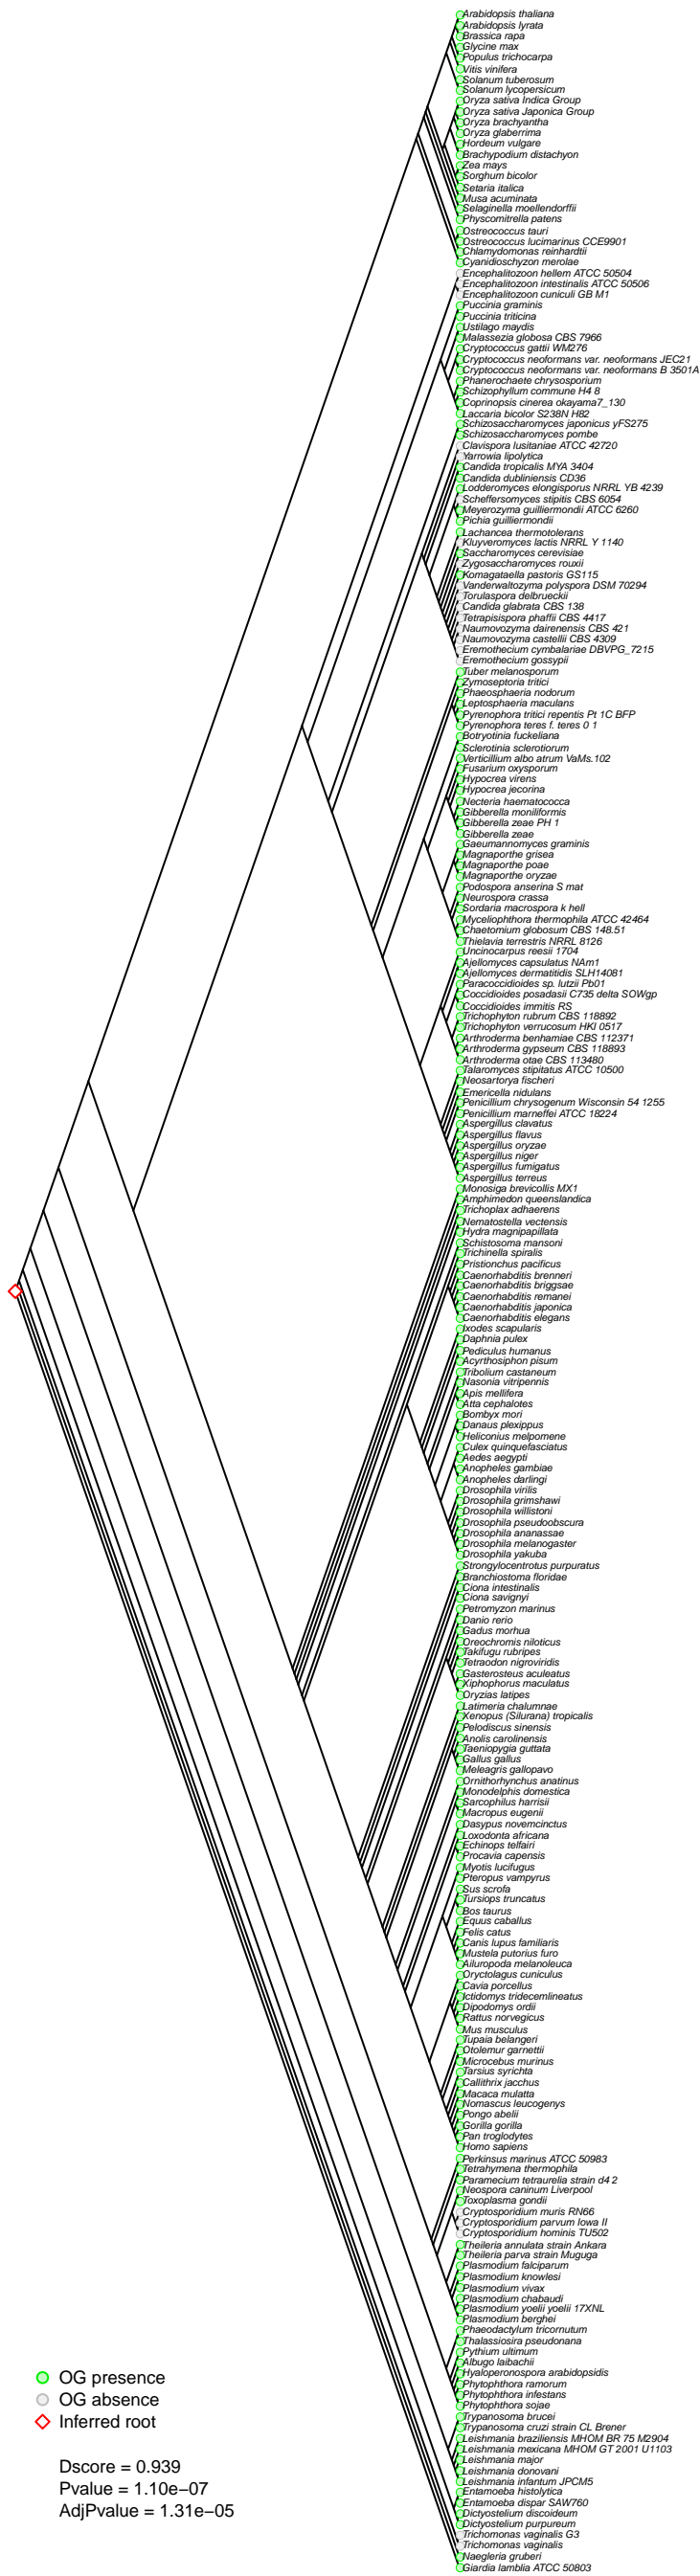

# COG0450

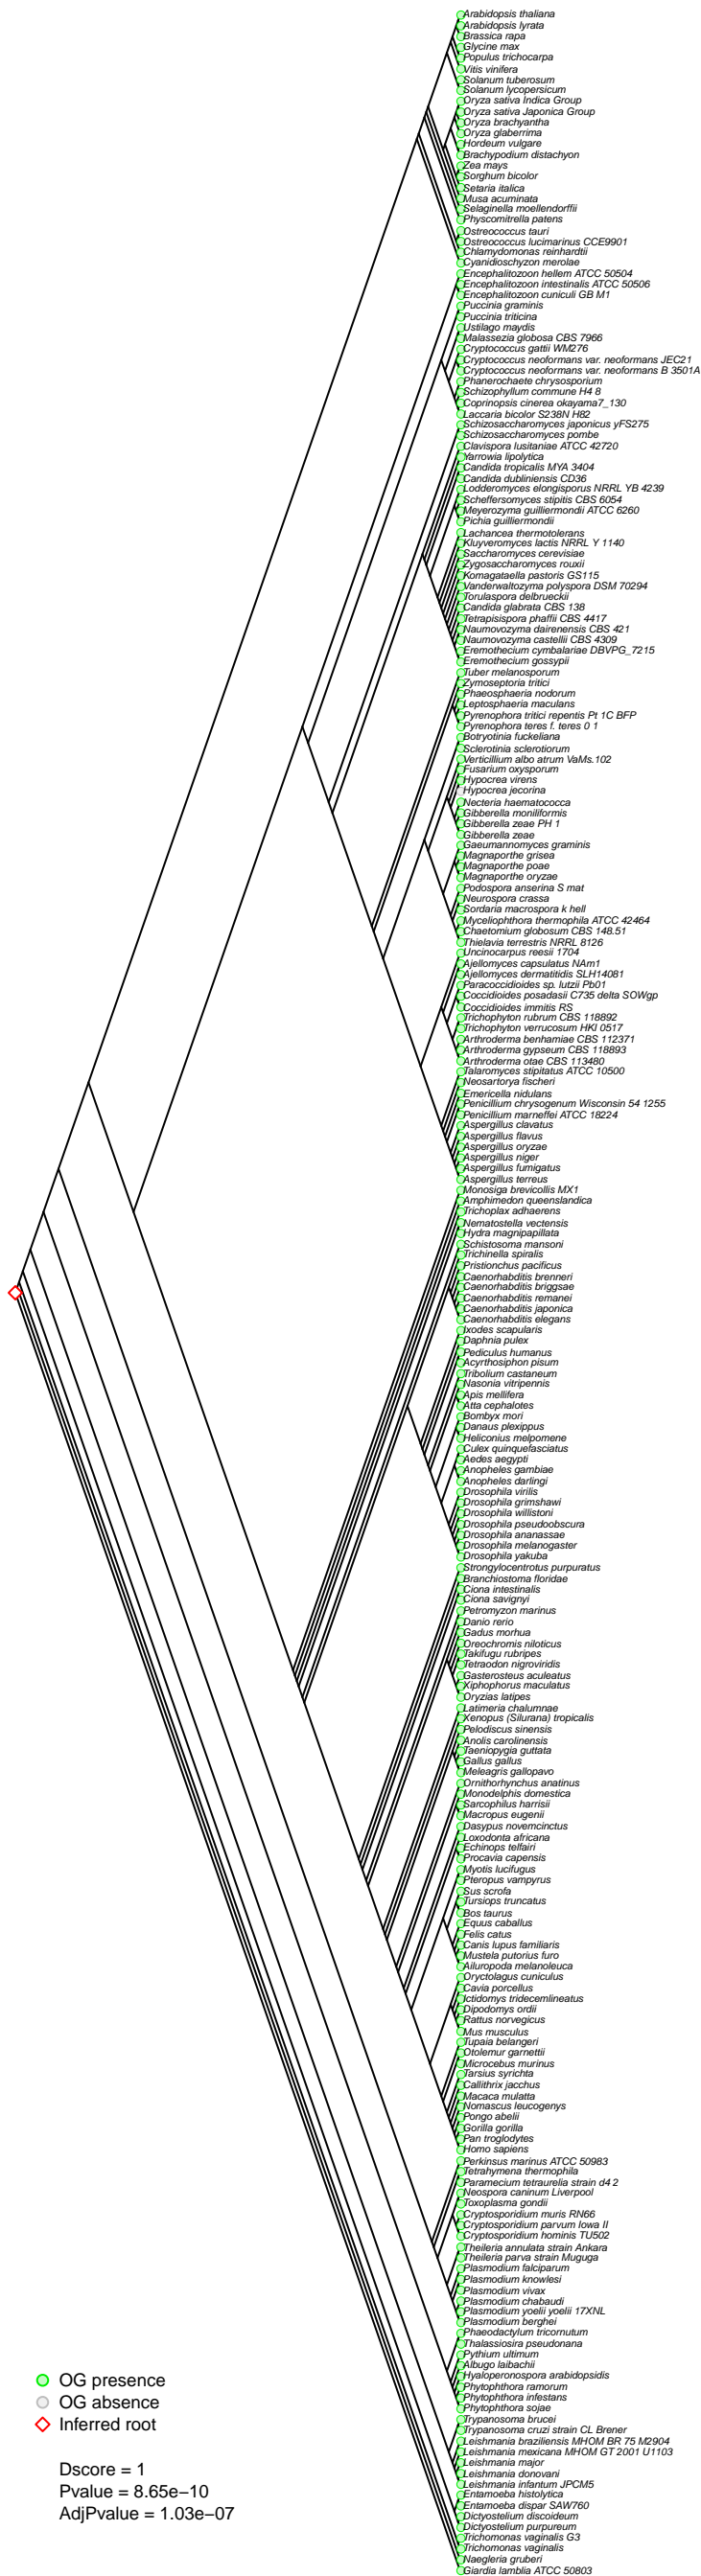

# COG0492

- Arabidopsis thaliana
- Arabidopsis lyrata
- Brassica rapa
- Glycine max
- Populus trichocarpa
- Vitis vinifera
- Solanum tuberosum
- Solanum lycopersicum
- Oryza sativa Indica Group
- Oryza sativa Japonica Group
- Oryza brachyantha
- Oryza glaberrima
- Hordeum vulgare
- Brachypodium distachyon
- Zea mays
- Sorghum bicolor
- Setaria italica
- Musa acuminata
- Selaginella moellendorffii
- Physcomitrella patens
- Ostreococcus tauri
- Ostreococcus lucimarinus CCE9901
- Chlamydomonas reinhardtii
- Cyanidioschyzon merolae
- Encephalitozoon hellem ATCC 50504
- Encephalitozoon intestinalis ATCC 50506
- Encephalitozoon cuniculi GB M1
- Puccinia graminis
- Puccinia triticina
- Ustilago maydis
- Melassezia globosa CBS 7966
- Cryptococcus gattii WM276
- Cryptococcus neoformans var. neoformans JEC21
- Cryptococcus neoformans var. neoformans B 3501A
- Phanerochaete chrysosporium
- Schizophyllum commune H4 B
- Coprinopsis cinerea okayama7\_130
- Laccaria bicolor S238N H82
- Schizosaccharomyces japonicus yFS275
- Schizosaccharomyces pombe
- Clavospora lusitaniae ATCC 42720
- Yarrowia lipolytica
- Candida tropicalis MYA 3404
- Candida dubliniensis CD36
- Lodderomyces elongisporus NRRL YB 4239
- Scheffersomyces stipitis CBS 6054
- Meyeromyza guilliermondii ATCC 6260
- Pichia guilliermondii
- Lachancea thermotolerans
- Kluyveromyces fragilis NRRL Y 1140
- Saccharomyces cerevisiae
- Zygosaccharomyces rouxii
- Komagataella pastoris GS115
- Vanderwaltozyma polyspora DSM 70294
- Torulaspora delbrueckii
- Candida glabrata CBS 138
- Tetrapisispora phaffii CBS 4417
- Naumovozyma dairensis CBS 421
- Naumovozyma castellii CBS 4309
- Eremothecium cymbalariae DBVPG\_7215
- Eremothecium gossypii
- Tuber melanosporum
- Zygomycetozyma tritici
- Phaeosphaeria nodorum
- Leptosphaeria maculans
- Pyrenophora tritici repens Pt 1C BFP
- Pyrenophora teres f. teres 0 1
- Botryotinia fuckeliana
- Sclerotinia sclerotiorum
- Verticillium albo atrum VaMs.102
- Fusarium oxysporum
- Hypocrea virens
- Hypocrea jecorina
- Nectria haematococca
- Gibberella moniliformis
- Gibberella zeae PH 1
- Gibberella zeae
- Gaeumannomyces graminis
- Magnaporthe grisea
- Magnaporthe poae
- Magnaporthe oryzae
- Podospora anserina S mat
- Neurospora crassa
- Sordaria macrospora k hell
- Myceliophthora thermophila ATCC 42464
- Chaetomium globosum CBS 148.51
- Thielavia terrestris NRRL 8126
- Uncinocarpus reesii 1704
- Ajellomyces capsulatus Nam1
- Ajellomyces dermatitidis SLH14081
- Paracoccidioides sp. lutzi Pb01
- Coccidioides posadasii C735 delta SOWgp
- Coccidioides immitis RS
- Trichophyton rubrum CBS 118892
- Trichophyton verrucosum HKI 0517
- Arthroderma benhamiae CBS 112371
- Arthroderma gypseum CBS 118893
- Arthroderma otae CBS 113480
- Talaromyces stipitatus ATCC 10500
- Neosartorya fischeri
- Emericella nidulans
- Penicillium chrysogenum Wisconsin 54 1255
- Penicillium marneffei ATCC 18224
- Aspergillus clavatus
- Aspergillus flavus
- Aspergillus oryzae
- Aspergillus niger
- Aspergillus fumigatus
- Aspergillus terreus
- Monosiga brevicollis MX1
- Amphimedon queenslandica
- Trichoplax adhaerens
- Nematostella vectensis
- Hydra magnipapillata
- Schistosoma mansoni
- Trichiella spiralis
- Pristionchus pacificus
- Caenorhabditis brenneri
- Caenorhabditis briggsae
- Caenorhabditis remanei
- Caenorhabditis japonica
- Caenorhabditis elegans
- Ixodes scapularis
- Daphnia pulex
- Pediculus humanus
- Acyrthosiphon pisum
- Tribolium castaneum
- Nasonia vitripennis
- Apis mellifera
- Atta cephalotes
- Bombyx mori
- Danaus plexippus
- Heliconia melpomene
- Culex quinquefasciatus
- Aedes aegypti
- Anopheles gambiae
- Anopheles darlingi
- Drosophila virilis
- Drosophila grimshawi
- Drosophila willistoni
- Drosophila pseudoobscura
- Drosophila ananassae
- Drosophila melanogaster
- Drosophila yakuba
- Strongylocentrotus purpuratus
- Branchiostoma floridae
- Ciona intestinalis
- Ciona savignyi
- Petromyzon marinus
- Danio rerio
- Gadus morhua
- Oreochromis niloticus
- Takifugu rubripes
- Tetraodon nigroviridis
- Gasterosteus aculeatus
- Xiphophorus maculatus
- Oryzias latipes
- Latimeria chalumnae
- Xenopus (Silurana) tropicalis
- Pelodiscus sinensis
- Anolis carolinensis
- Taeniopygia guttata
- Gallus gallus
- Meleagris gallopavo
- Ornithorynchus anatinus
- Monodelphis domestica
- Sarcophilus harrisii
- Macropus eugenii
- Dasyurus novemcinctus
- Loxodonta africana
- Echinops telfairii
- Procavia capensis
- Myotis lucifugus
- Pteropus vampyrus
- Sus scrofa
- Turdus truncatus
- Bos taurus
- Equus caballus
- Felis catus
- Canis lupus familiaris
- Mustela putorius furo
- Alluopoda melanoleuca
- Cryptolestes cucullatus
- Cavia porcellus
- Ictidomys tridecemlineatus
- Dipodomys ordii
- Rattus norvegicus
- Mus musculus
- Tupaia belangeri
- Otolomus garrettii
- Microcebus murinus
- Tarsius syrichta
- Callithrix jacchus
- Macaca mulatta
- Nomascus leucogenys
- Pongo abelii
- Gorilla gorilla
- Pan troglodytes
- Homo sapiens
- Perkinsus marinus ATCC 50983
- Tetrahymena thermophila
- Paramecium tetraurelia strain d4 2
- Neospora caninum Liverpool
- Toxoplasma gondii
- Cryptosporidium muris RN66
- Cryptosporidium parvum Iowa II
- Cryptosporidium hominis TU502
- Theileria annulata strain Ankara
- Theileria parva strain Muguga
- Plasmodium falciparum
- Plasmodium knowlesi
- Plasmodium vivax
- Plasmodium chabaudi
- Plasmodium yoelii yoelii 17XNL
- Plasmodium berghei
- Phaeodactylum tricorutum
- Thalassiosira pseudonana
- Pythium ultimum
- Albugo laibachii
- Hyaloperonospora arabidopsidis
- Phytophthora ramorum
- Phytophthora infestans
- Phytophthora sojae
- Trypanosoma brucei
- Trypanosoma cruzi strain CL Brener
- Leishmania braziliensis MHOM BR 75 M2904
- Leishmania mexicana MHOM GT 2001 U1103
- Leishmania major
- Leishmania donovani
- Leishmania infantum JPCM5
- Entamoeba histolytica
- Entamoeba dispar SAW760
- Dictyostellium discoideum
- Dictyostellium purpureum
- Trichomonas vaginalis G3
- Trichomonas vaginalis
- Naegleria gruberi
- Giardia lamblia ATCC 50803

● OG presence

○ OG absence

◇ Inferred root

Dscore = 0.846

Pvalue = 1.85e-05

AdjPvalue = 2.20e-03

# COG0526

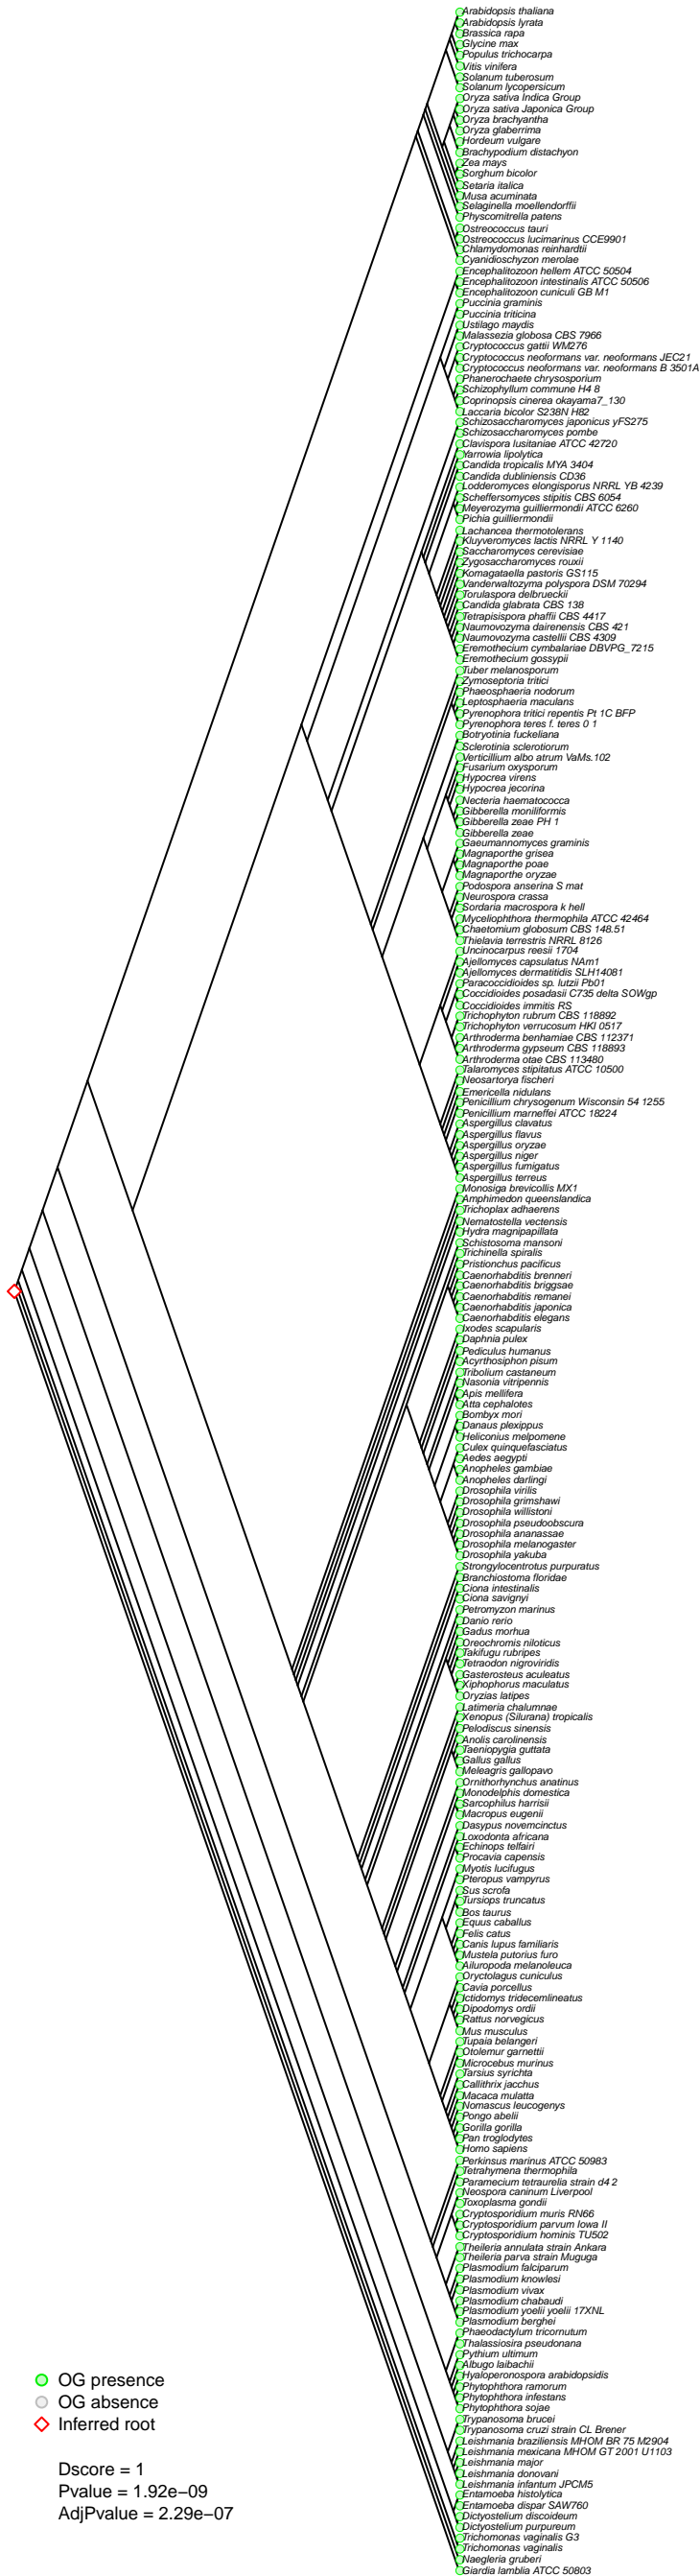



# COG0605

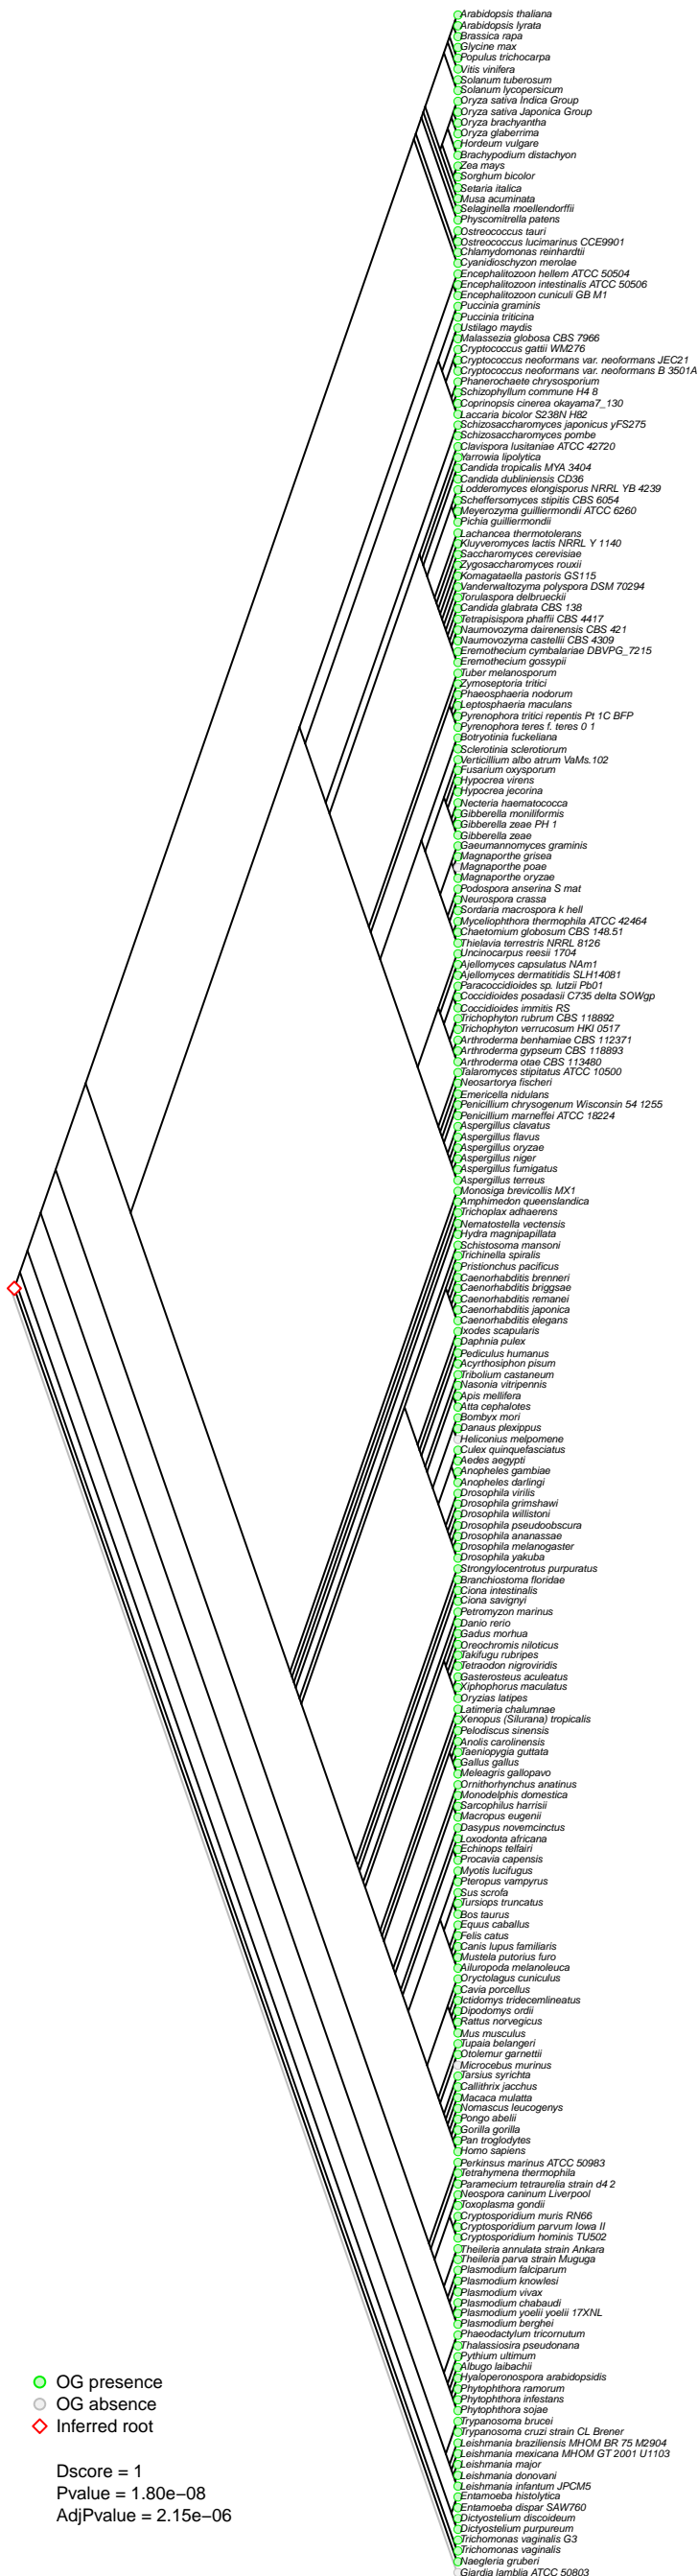

# COG0678

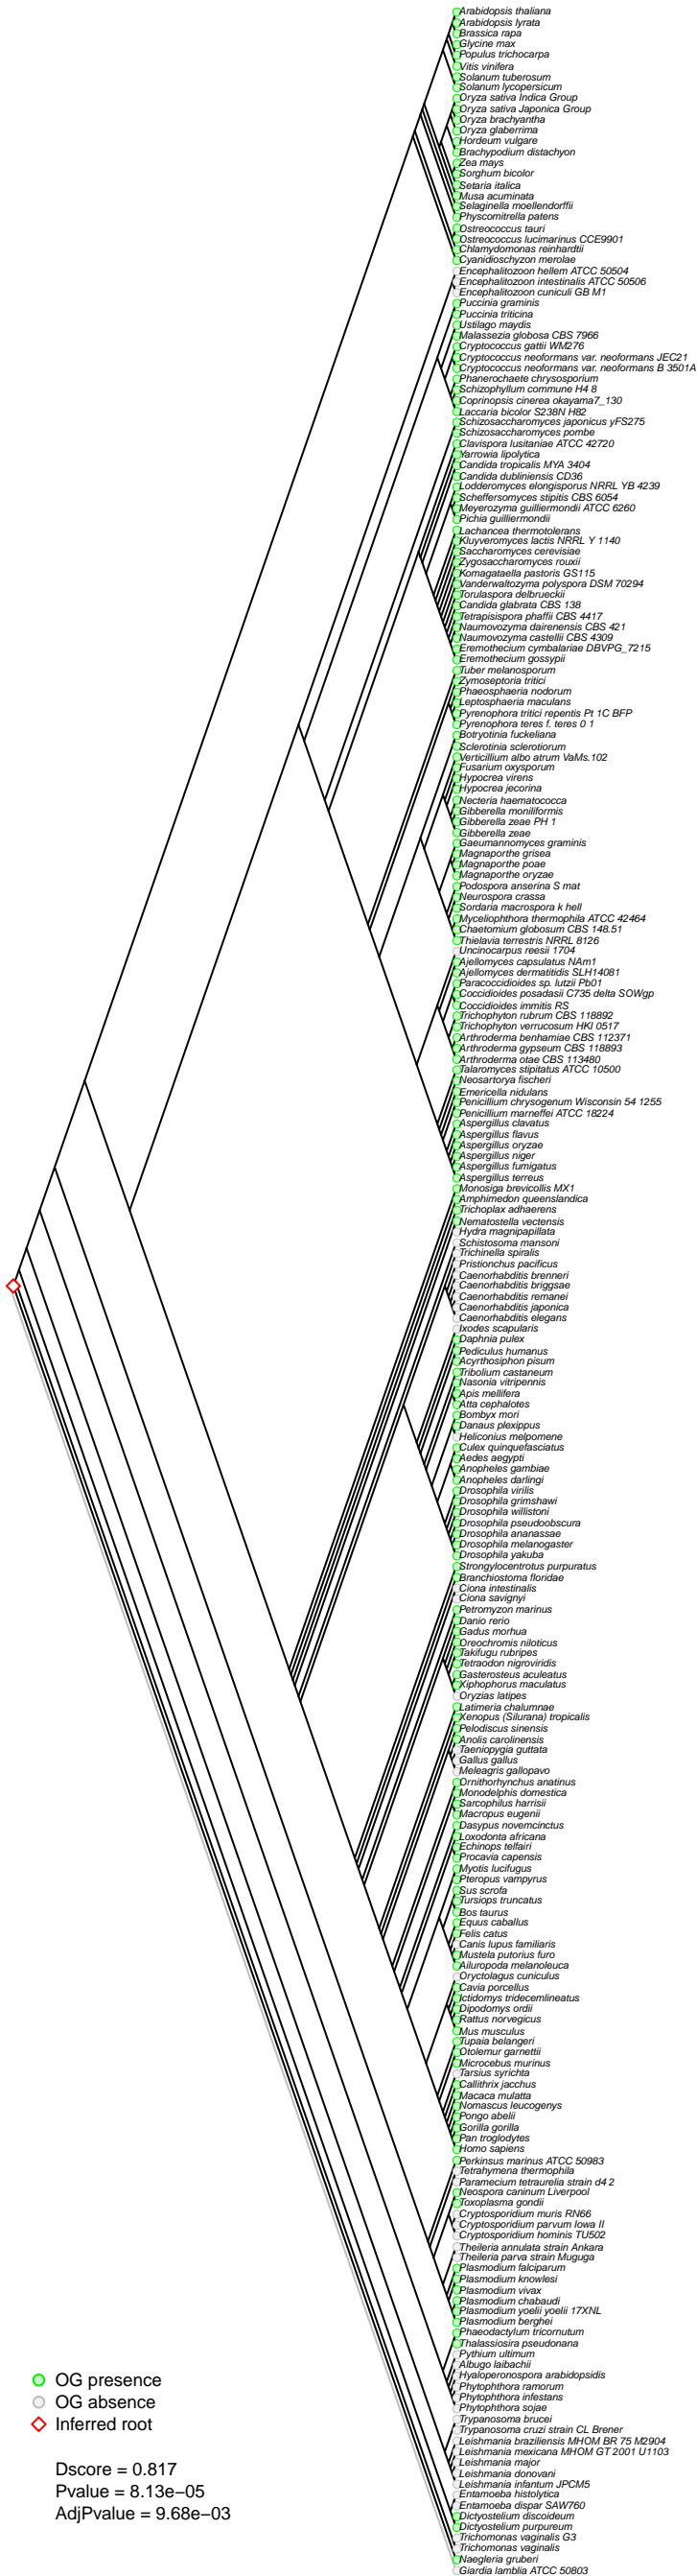

# COG0695

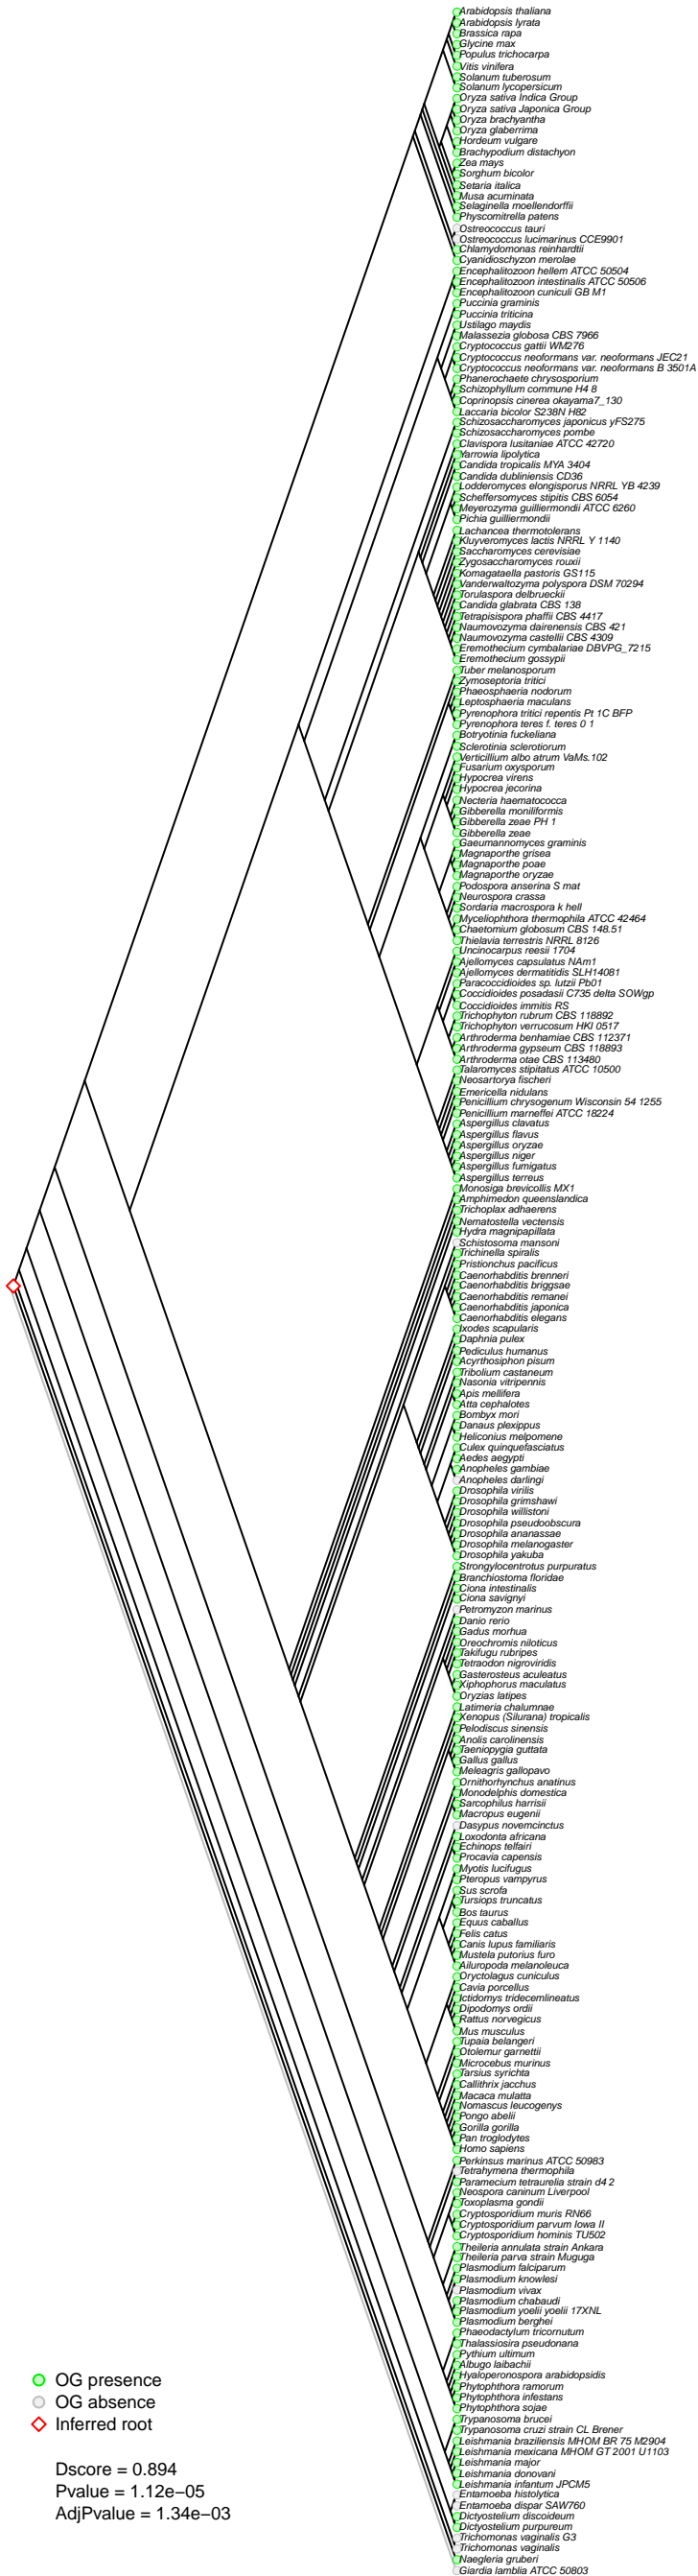

Dscore = 0.894  
 Pvalue = 1.12e-05  
 AdjPvalue = 1.34e-03

# COG0753

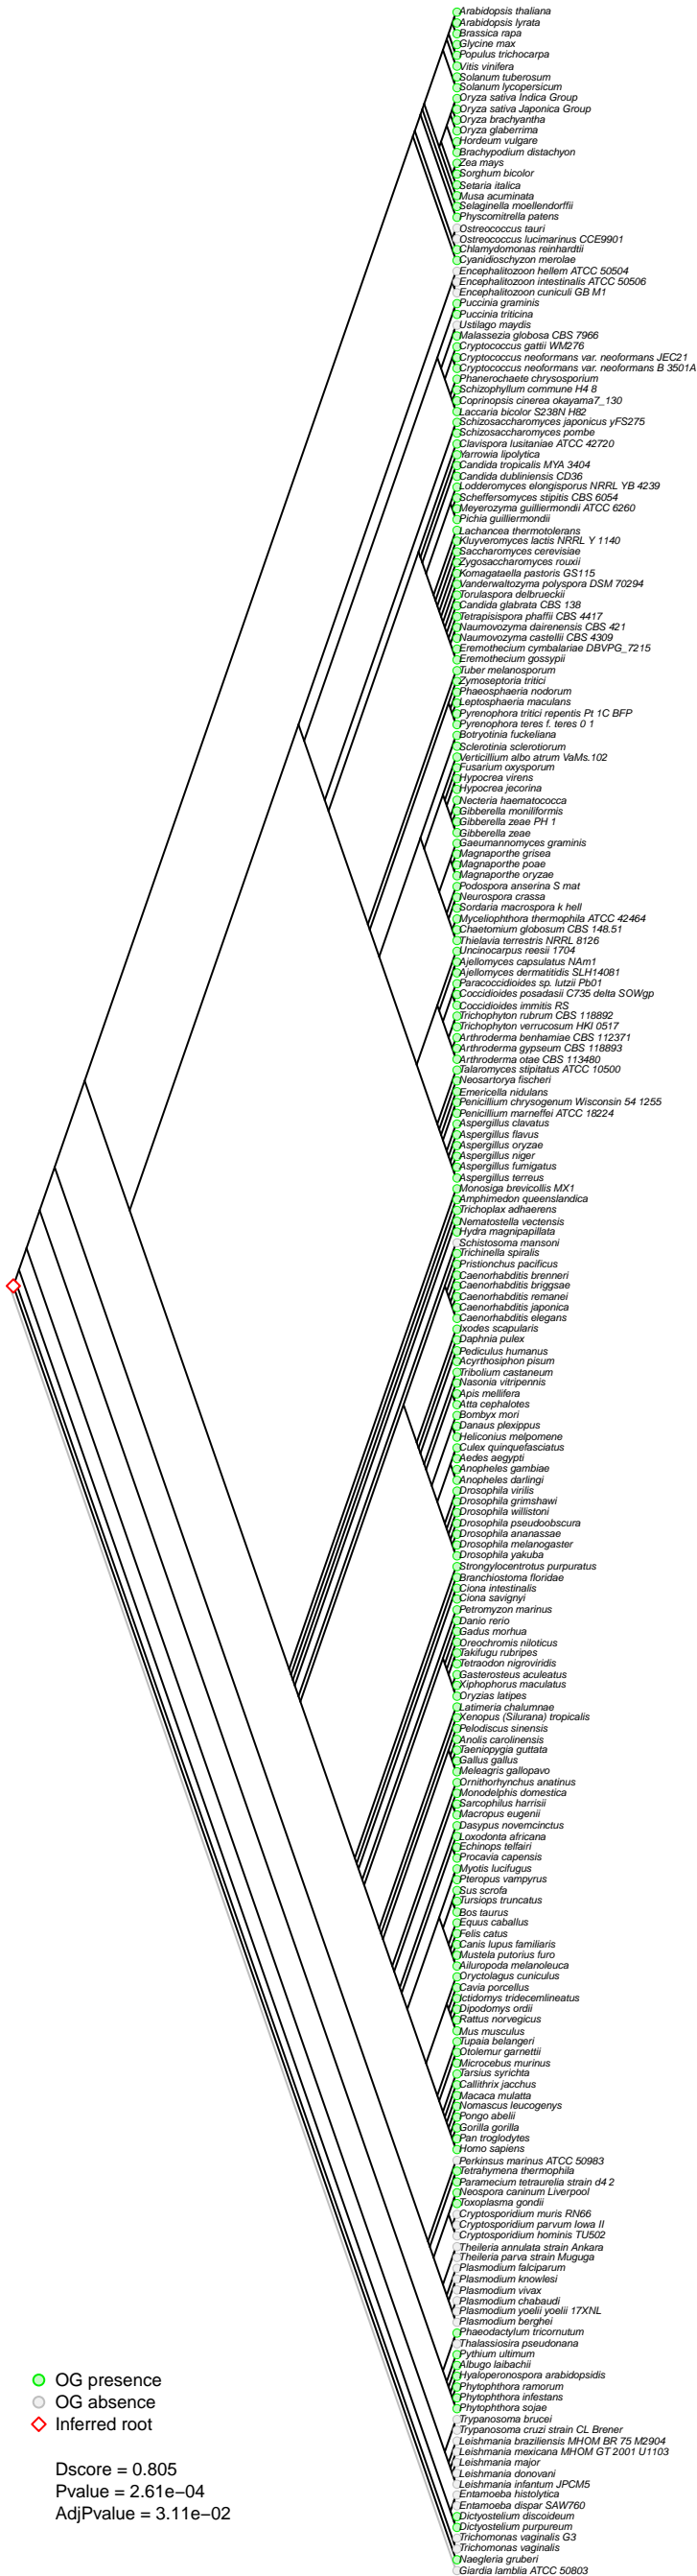

# COG1225

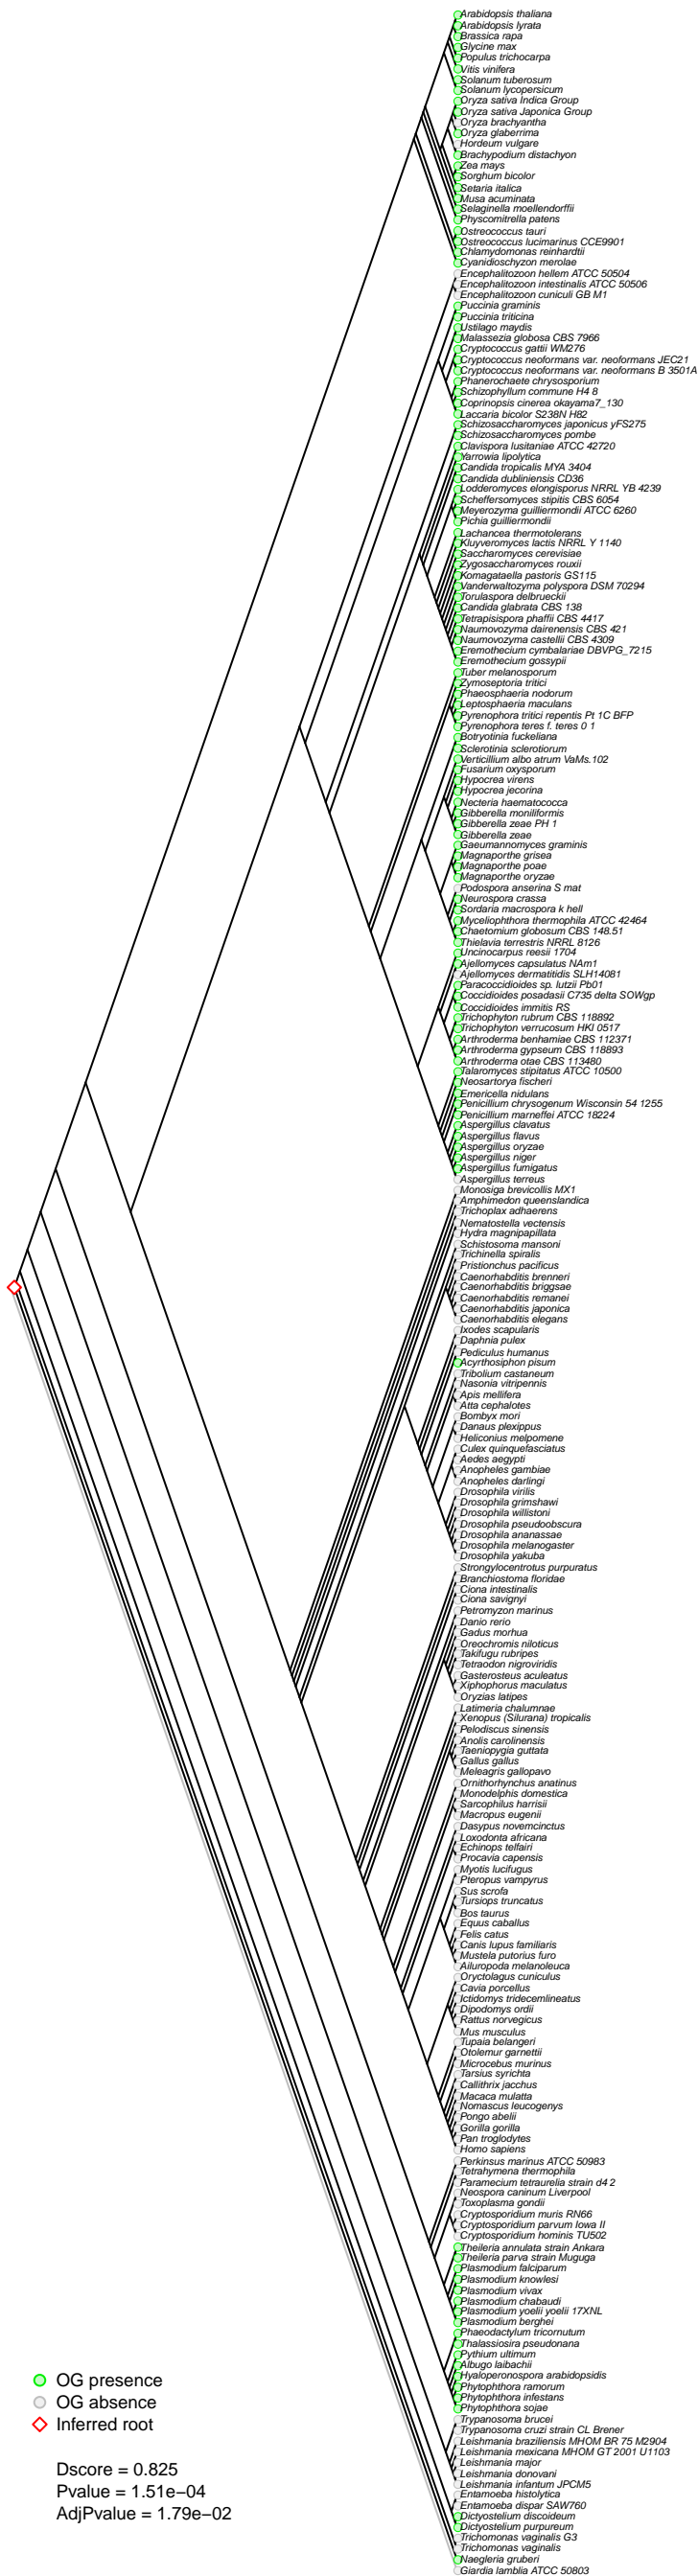

Dscore = 0.825  
 Pvalue = 1.51e-04  
 AdjPvalue = 1.79e-02

# COG1249

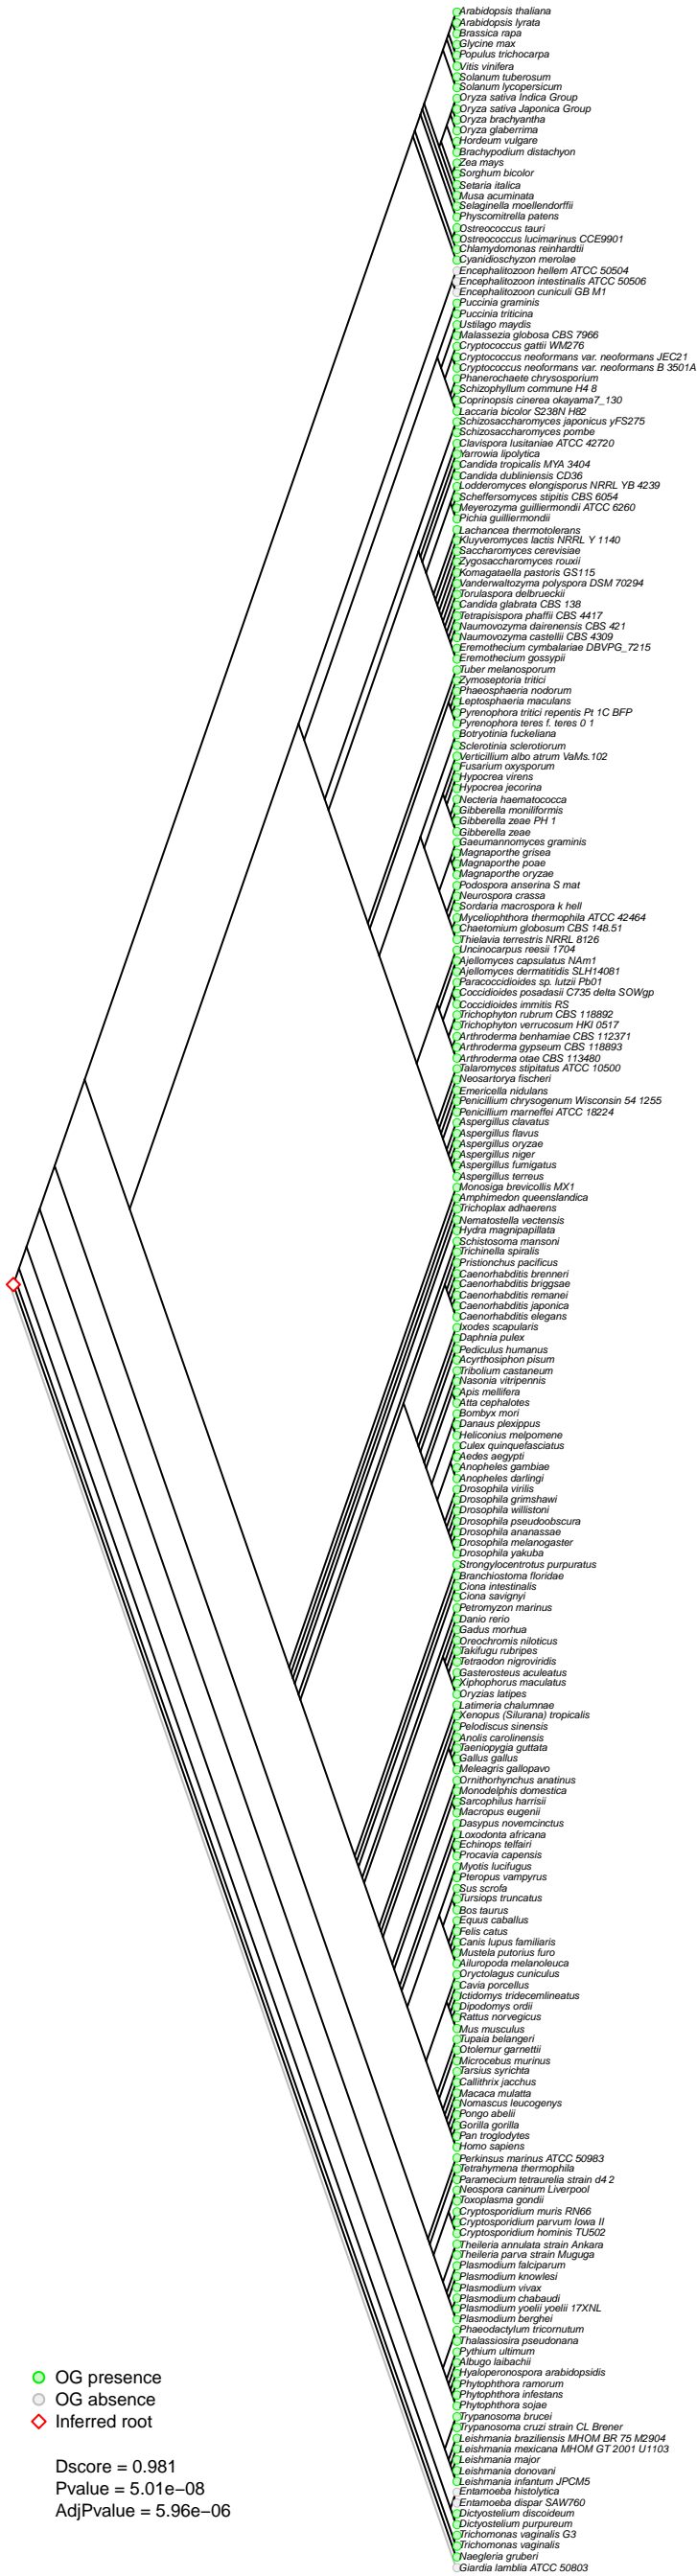

# COG1304

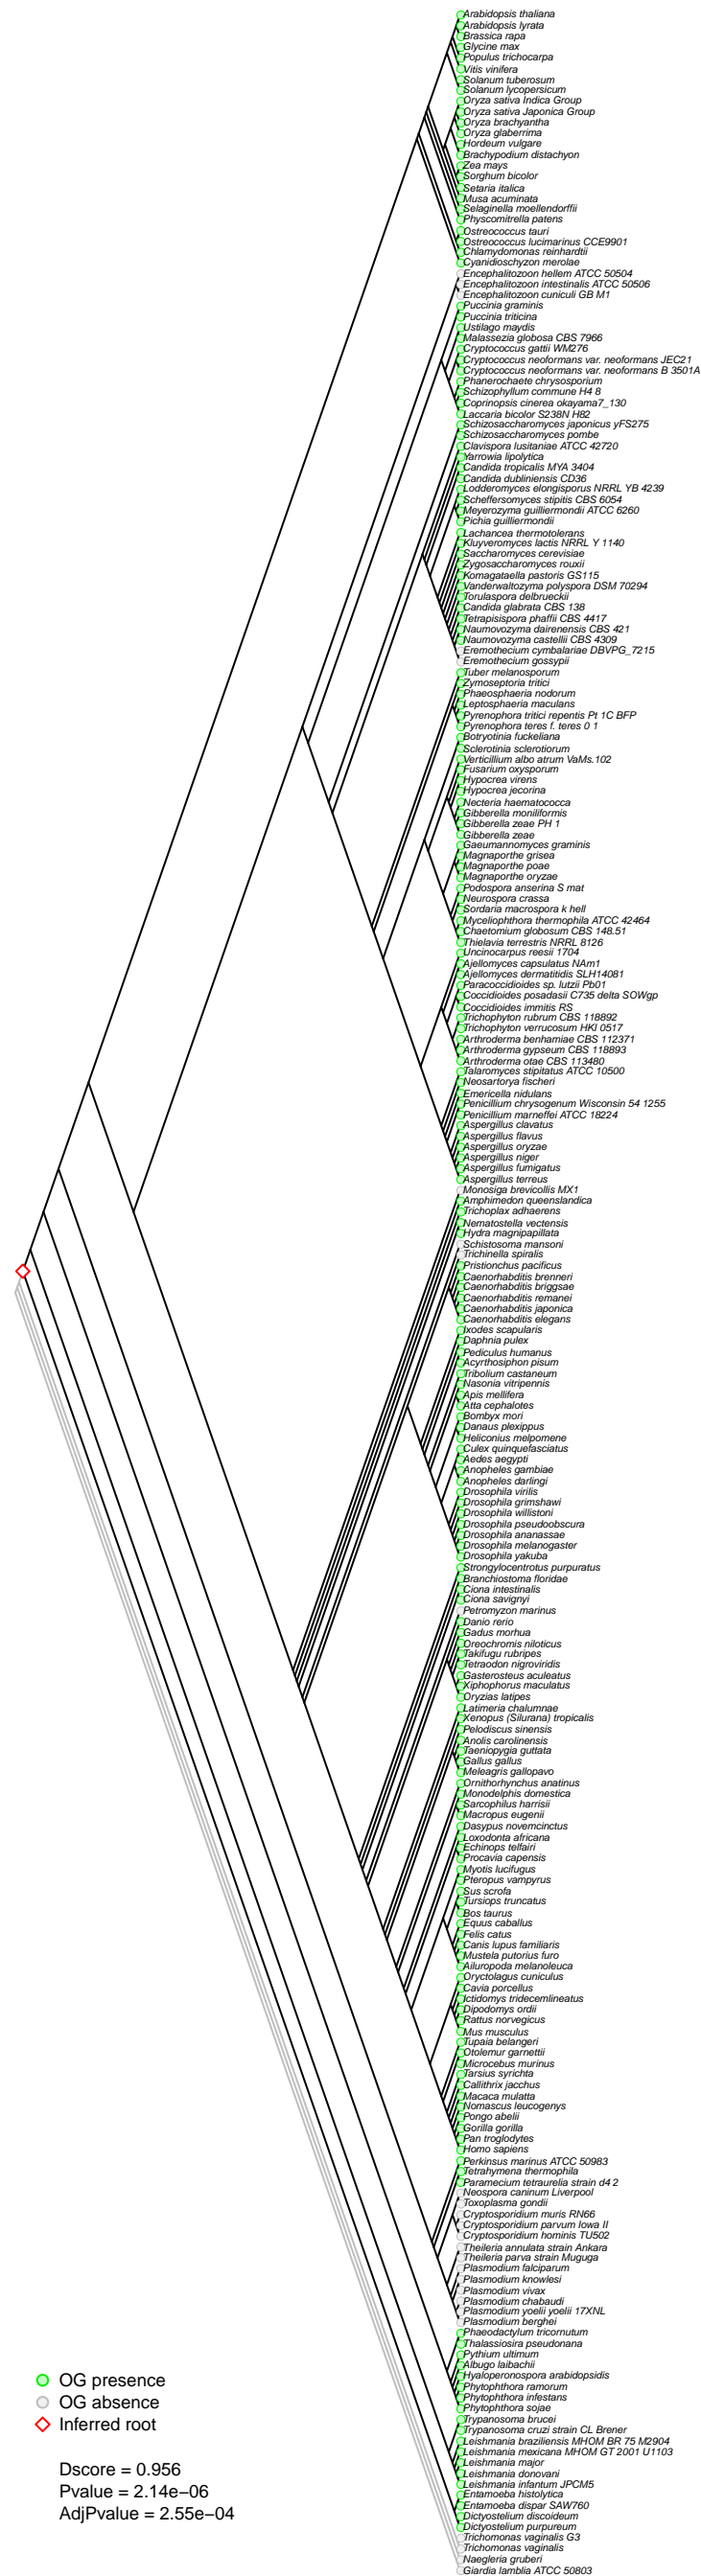

# COG1324

- Arabidopsis thaliana
- Arabidopsis lyrata
- Brassica rapa
- Glycine max
- Populus trichocarpa
- Vitis vinifera
- Solanum tuberosum
- Solanum lycopersicum
- Oryza sativa Indica Group
- Oryza sativa Japonica Group
- Oryza brachyantha
- Oryza glaberrima
- Hordeum vulgare
- Brachypodium distachyon
- Zea mays
- Sorghum bicolor
- Setaria italica
- Musa acuminata
- Selaginella moellendorffii
- Physcomitrella patens
- Ostreococcus tauri
- Ostreococcus lucimarinus CCE9901
- Chlamydomonas reinhardtii
- Cyanidioschyzon merolae
- Encephalitozoon hellem ATCC 50504
- Encephalitozoon intestinalis ATCC 50506
- Encephalitozoon cuniculi GB M1
- Puccinia graminis
- Puccinia triticina
- Ustilago maydis
- Malassezia globosa CBS 7966
- Cryptococcus gattii WM276
- Cryptococcus neoformans var. neoformans JEC21
- Cryptococcus neoformans var. neoformans B 3501A
- Phanerochaete chrysosporium
- Schizophyllum commune H4 B
- Coprinopsis cinerea okayama7\_130
- Laccaria bicolor S238N H82
- Schizosaccharomyces japonicus yFS275
- Schizosaccharomyces pombe
- Clavospora lusitanae ATCC 42720
- Yarrowia lipolytica
- Candida tropicalis MYA 3404
- Candida dubliniensis CD36
- Lodderomyces elongisporus NRRL YB 4239
- Scheffersomyces stipitis CBS 6054
- Meyerozyma guilliermondii ATCC 6260
- Pichia guilliermondii
- Lachancea thermotolerans
- Kluyveromyces lactis NRRL Y 1140
- Saccharomyces cerevisiae
- Zygosaccharomyces rouxii
- Komagataella pastoris GS115
- Vanderwaltozyma polyspora DSM 70294
- Torulasporea delbrueckii
- Candida glabrata CBS 138
- Tetrapispora phaffii CBS 4417
- Naumovozyma dairensis CBS 421
- Naumovozyma castellii CBS 4309
- Eremothecium cymbalariae DBVPG\_7215
- Eremothecium gossypii
- Tuber melanosporum
- Zymoseptoria tritici
- Phaeosphaeria nodorum
- Leptosphaeria maculans
- Pyrenophora tritici repens Pt 1C BFP
- Pyrenophora teres f. teres 0 1
- Botryotinia fuckeliana
- Sclerotinia sclerotiorum
- Verticillium albo atrum VaMs.102
- Fusarium oxysporum
- Hypocrea virens
- Hypocrea jecorina
- Nectria haematococca
- Gibberella moniliformis
- Gibberella zeae PH 1
- Gibberella zeae
- Gaeumannomyces graminis
- Magnaporthe grisea
- Magnaporthe poae
- Magnaporthe oryzae
- Podospora anserina S mat
- Neurospora crassa
- Sordaria macrospora k hell
- Myceliophthora thermophila ATCC 42464
- Chaetomium globosum CBS 148.51
- Thielavia terrestris NRRL 8126
- Uncinocarpus reesii 1704
- Ajellomyces capsulatus Nam1
- Ajellomyces dermatitidis SLH14081
- Paracoccidioides sp. lutzi Pb01
- Coccidioides posadasii C735 delta SOWgp
- Coccidioides immitis RS
- Trichophyton rubrum CBS 118892
- Trichophyton verrucosum HKI 0517
- Arthroderma benhamiae CBS 112371
- Arthroderma gypseum CBS 118893
- Arthroderma otae CBS 113480
- Talaromyces stipitatus ATCC 10500
- Neosartorya fischeri
- Emericella nidulans
- Penicillium chrysogenum Wisconsin 54 1255
- Penicillium marneffei ATCC 18224
- Aspergillus clavatus
- Aspergillus flavus
- Aspergillus oryzae
- Aspergillus niger
- Aspergillus fumigatus
- Aspergillus terreus
- Monosiga brevicollis MX1
- Amphimedon queenslandica
- Trichoplax adhaerens
- Nematostella vectensis
- Hydra magnipapillata
- Schistosoma mansoni
- Trichinella spiralis
- Pristionchus pacificus
- Caenorhabditis breneri
- Caenorhabditis briggsae
- Caenorhabditis remanei
- Caenorhabditis japonica
- Caenorhabditis elegans
- Drosophila melanogaster
- Drosophila yakuba
- Drosophila obscura
- Drosophila ananassae
- Drosophila melanogaster
- Drosophila yakuba
- Strongylocentrotus purpuratus
- Branchiostoma floridae
- Ciona intestinalis
- Ciona savignyi
- Petromyzon marinus
- Danio rerio
- Gadus morhua
- Oreochromis niloticus
- Takifugu rubripes
- Tetraodon nigroviridis
- Gasterosteus aculeatus
- Xiphophorus maculatus
- Oryzias latipes
- Latimeria chalumnae
- Xenopus (Silurana) tropicalis
- Pelodiscus sinensis
- Anolis carolinensis
- Taeniopygia guttata
- Gallus gallus
- Meleagris gallopavo
- Ornithorhynchus anatinus
- Monodelphis domestica
- Sarcophilus harrisii
- Macropus eugenii
- Dasyurus novemcinctus
- Loxodonta africana
- Echinosorex tillarii
- Procavia capensis
- Myotis lucifugus
- Pteropus vampyrus
- Sus scrofa
- Tursiops truncatus
- Bos taurus
- Equus caballus
- Felis catus
- Canis lupus familiaris
- Mustela putorius furo
- Alluorhina melanoleuca
- Cryptolestes cuniculus
- Cavia porcellus
- Urocyon v. tridecemlineatus
- Dipodomys ordii
- Rattus norvegicus
- Mus musculus
- Tupaia belangeri
- Diolomus garrettii
- Microcebus murinus
- Tarsius syrichta
- Callithrix jacchus
- Macaca mulatta
- Nomascus leucogenys
- Pongo abelii
- Gorilla gorilla
- Pan troglodytes
- Homo sapiens
- Perkinsus marinus ATCC 50983
- Tetrahymena thermophila
- Paramecium tetraurelia strain d4 2
- Neospora caninum Liverpool
- Toxoplasma gondii
- Cryptosporidium muris RN66
- Cryptosporidium parvum Iowa II
- Cryptosporidium hominis TU502
- Theileria annulata strain Ankara
- Theileria parva strain Muguga
- Plasmodium falciparum
- Plasmodium knowlesi
- Plasmodium vivax
- Plasmodium chabaudi
- Plasmodium yoelii yoelii 17XNL
- Plasmodium berghei
- Phaeodactylum tricornutum
- Thalassiosira pseudonana
- Pythium ultimum
- Albugo laluchii
- Hyaloperonospora arabidopsidis
- Phytophthora ramorum
- Phytophthora infestans
- Phytophthora sojae
- Trypanosoma brucei
- Trypanosoma cruzi strain CL Brener
- Leishmania braziliensis MHOM BR 75 M2904
- Leishmania mexicana MHOM GT 2001 U1103
- Leishmania major
- Leishmania donovani
- Leishmania infantum JPCM5
- Entamoeba histolytica
- Entamoeba dispar SAW760
- Dicystostellum discoideum
- Dicystostellum purpureum
- Trichomonas vaginalis G3
- Trichomonas vaginalis
- Naegleria gruberi
- Giardia lamblia ATCC 50803

- OG presence
- OG absence
- Inferred root

Dscore = 0.71

Pvalue = 4.58e-04

AdjPvalue = 5.46e-02



# COG1528

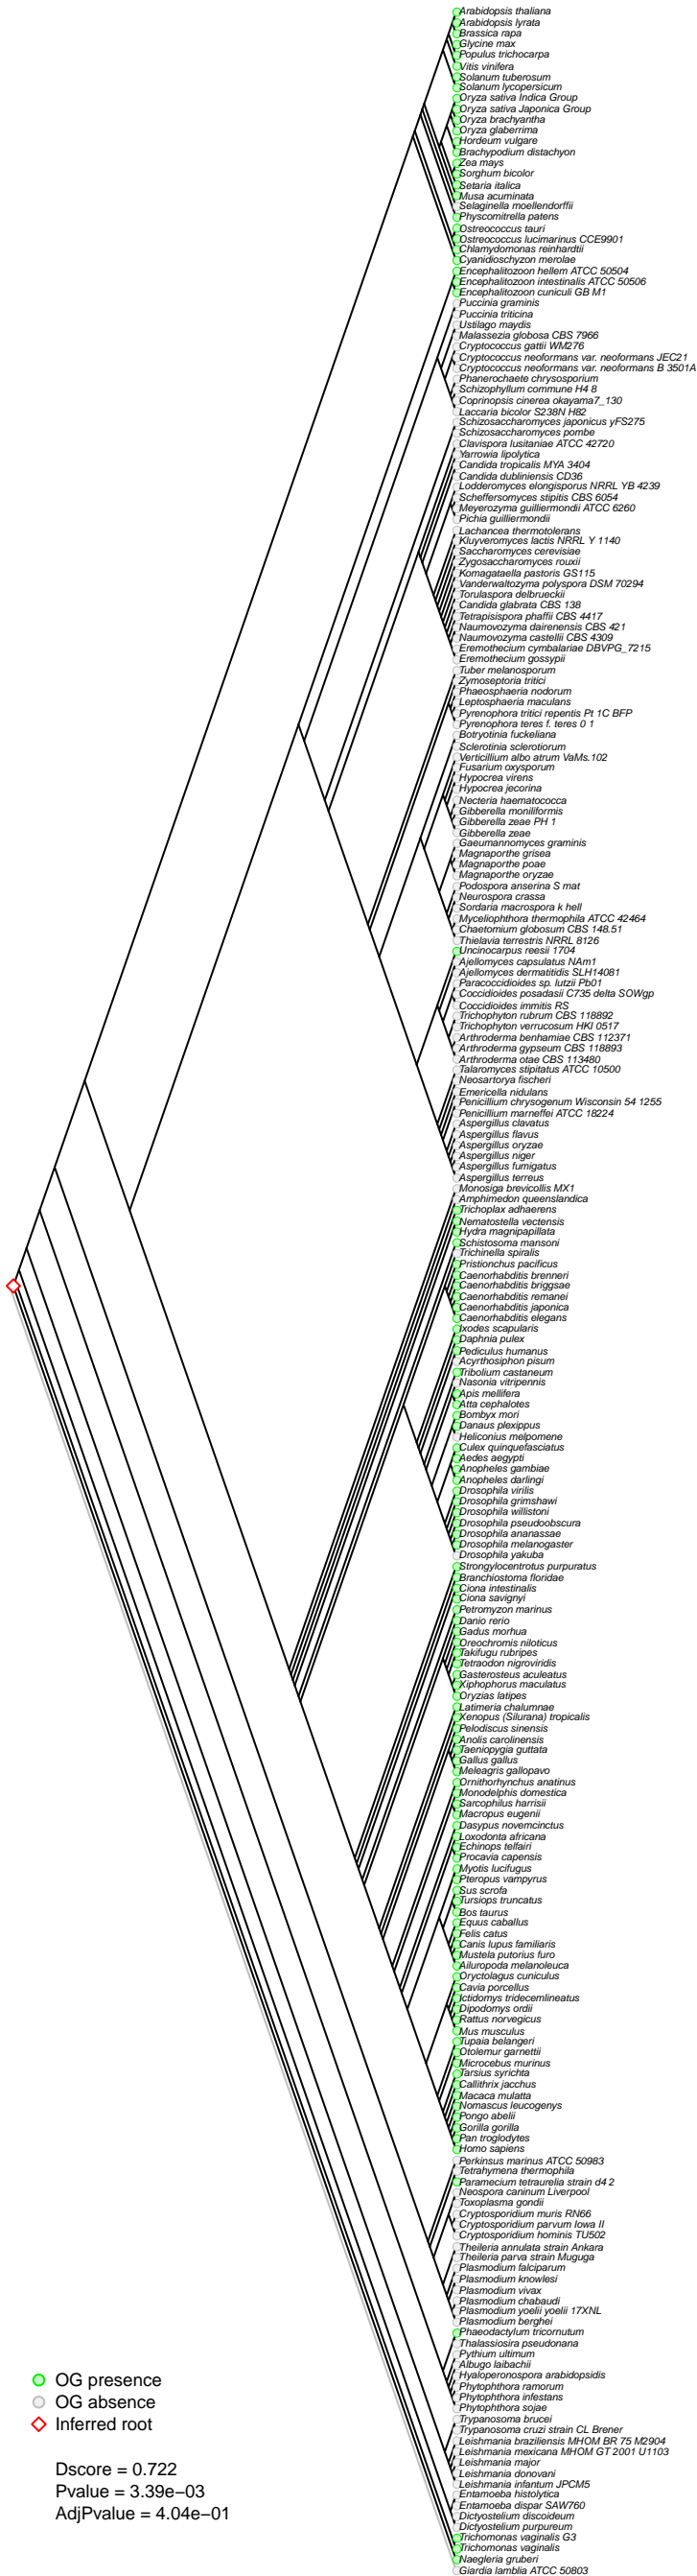

# COG2032

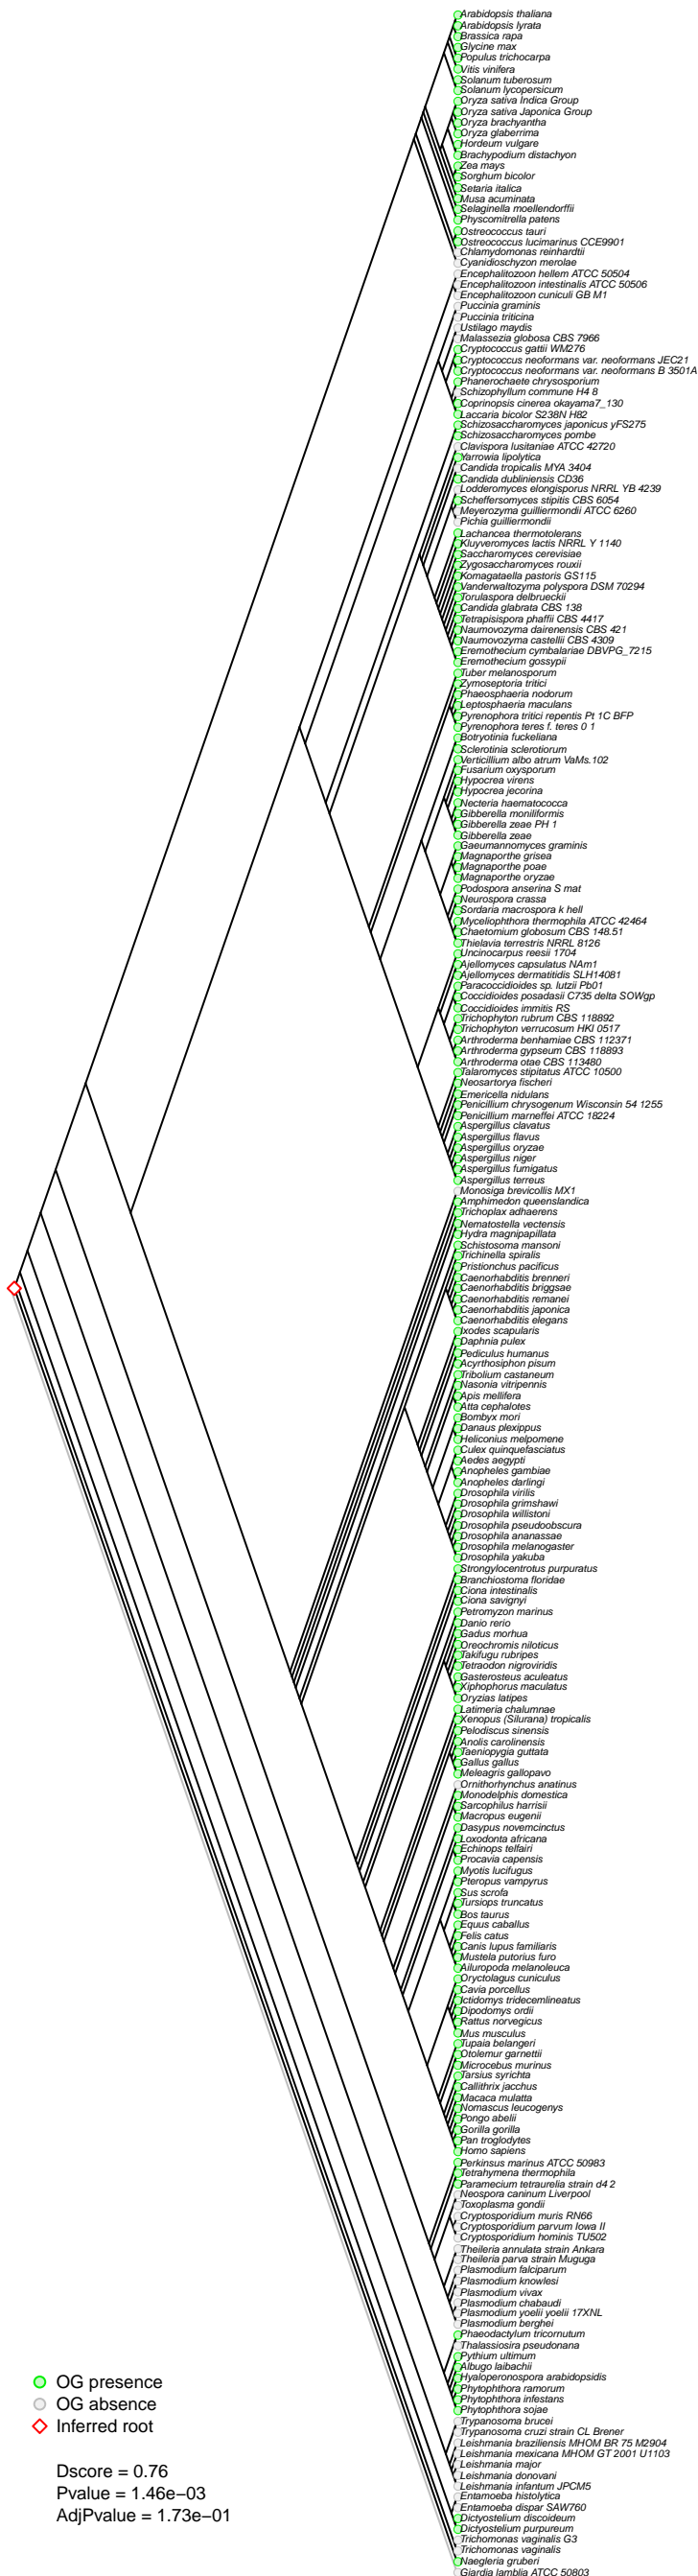

# COG2070

- Arabidopsis thaliana
- Arabidopsis lyrata
- Brassica rapa
- Glycine max
- Populus trichocarpa
- Vitis vinifera
- Solanum tuberosum
- Solanum lycopersicum
- Oryza sativa Indica Group
- Oryza sativa Japonica Group
- Oryza brachyantha
- Oryza glaberrima
- Hordeum vulgare
- Brachypodium distachyon
- Zea mays
- Sorghum bicolor
- Setaria italica
- Musa acuminata
- Selaginella moellendorffii
- Physcomitrella patens
- Ostreococcus tauri
- Ostreococcus lucimarinus CCE9901
- Chlamydomonas reinhardtii
- Cyanidioschyzon merolae
- Encephalitozoon hellem ATCC 50504
- Encephalitozoon intestinalis ATCC 50506
- Encephalitozoon cuniculi GB M1
- Puccinia graminis
- Puccinia triticina
- Ustilago maydis
- Melassezia globosa CBS 7966
- Cryptococcus gattii WM276
- Cryptococcus neoformans var. neoformans JEC21
- Cryptococcus neoformans var. neoformans B 3501A
- Phanerochaete chrysosporium
- Schizophyllum commune H4 B
- Coprinopsis cinerea okayama7\_130
- Laccaria bicolor S238N H82
- Schizosaccharomyces japonicus yFS275
- Schizosaccharomyces pombe
- Clavospora lusitanae ATCC 42720
- Yarrowia lipolytica
- Candida tropicalis MYA 3404
- Candida dubliniensis CD36
- Lodderomyces elongisporus NRRL YB 4239
- Scheffersomyces stipitis CBS 6054
- Meyeromyza guilliermondii ATCC 6260
- Pichia guilliermondii
- Lachancea thermotolerans
- Kluyveromyces lactis NRRL Y 1140
- Saccharomyces cerevisiae
- Zygosaccharomyces rouxii
- Komagataella pastoris GS115
- Vanderwaltozyma polyspora DSM 70294
- Torulasporea delbrueckii
- Candida glabrata CBS 138
- Tetrapispora phaffii CBS 4417
- Naumovozyma dairensis CBS 421
- Naumovozyma castellii CBS 4309
- Eremothecium cymbalariae DBVPG\_7215
- Eremothecium gossypii
- Tuber melanosporum
- Zymoseptoria tritici
- Phaeosphaeria nodorum
- Leptosphaeria maculans
- Pyrenophora tritici repens Pt 1C BFP
- Pyrenophora teres f. teres 0 1
- Botryotinia fuckeliana
- Sclerotinia sclerotiorum
- Verticillium albo atrum VaMs.102
- Fusarium oxysporum
- Hypocrea virens
- Hypocrea jecorina
- Nectria haematococca
- Gibberella moniliformis
- Gibberella zeae PH 1
- Gibberella zeae
- Gaeumannomyces graminis
- Magnaporthe grisea
- Magnaporthe poae
- Magnaporthe oryzae
- Podospira anserina S mat
- Neurospora crassa
- Sordaria macrospora k hell
- Myceliophthora thermophila ATCC 42464
- Chaetomium globosum CBS 148.51
- Thielavia terrestris NRRL 8126
- Uncinocarpus reesii 1704
- Ajellomyces capsulatus NAM1
- Ajellomyces dermatitidis SLH14081
- Paracoccidioides sp. lutzi Pb01
- Coccidioides posadasii C735 delta SOWgp
- Coccidioides immitis RS
- Trichophyton rubrum CBS 118892
- Trichophyton verrucosum HKI 0517
- Arthroderma benhamiae CBS 112371
- Arthroderma gypseum CBS 118893
- Arthroderma otae CBS 113480
- Talaromyces stipitatus ATCC 10500
- Neosartorya fischeri
- Emericella nidulans
- Penicillium chrysogenum Wisconsin 54 1255
- Penicillium marneffei ATCC 18224
- Aspergillus clavatus
- Aspergillus flavus
- Aspergillus oryzae
- Aspergillus niger
- Aspergillus fumigatus
- Aspergillus terreus
- Monosiga brevicollis MX1
- Amphimedon queenslandica
- Trichoplax adhaerens
- Nematostella vectensis
- Hydra magnipapillata
- Schistosoma mansoni
- Trichiella spiralis
- Pristionchus pacificus
- Caenorhabditis brenneri
- Caenorhabditis briggsae
- Caenorhabditis remanei
- Caenorhabditis japonica
- Caenorhabditis elegans
- Ixodes scapularis
- Daphnia pulex
- Pediculus humanus
- Acyrtosiphon pisum
- Tribolium castaneum
- Nasonia vitripennis
- Apis mellifera
- Atta cephalotes
- Bombyx mori
- Danaus plexippus
- Heliconius melpomene
- Culex quinquefasciatus
- Aedes aegypti
- Anopheles gambiae
- Anopheles darlingi
- Drosophila virilis
- Drosophila grimshawi
- Drosophila willistoni
- Drosophila pseudoobscura
- Drosophila ananassae
- Drosophila melanogaster
- Drosophila yakuba
- Strongylocentrotus purpuratus
- Branchiostoma floridae
- Ciona intestinalis
- Ciona savignyi
- Petromyzon marinus
- Danio rerio
- Gadus morhua
- Oreochromis niloticus
- Takifugu rubripes
- Tetraodon nigroviridis
- Gasterosteus aculeatus
- Xiphophorus maculatus
- Oryzias latipes
- Latimeria chalumnae
- Xenopus (Silurana) tropicalis
- Pelodiscus sinensis
- Anolis carolinensis
- Taeniopygia guttata
- Gallus gallus
- Meleagris gallopavo
- Ornithorhynchus anatinus
- Monodelphis domestica
- Sarcophilus harrisii
- Macropus eugenii
- Dasyurus novemcinctus
- Loxodonta africana
- Echinosys telillari
- Procavia capensis
- Myotis lucifugus
- Pteropus vampyrus
- Sus scrofa
- Tursiops truncatus
- Bos taurus
- Equus caballus
- Felis catus
- Canis lupus familiaris
- Mustela putorius furo
- Alluopoda melanoleuca
- Cryptolestes cuniculus
- Cavia porcellus
- Ictidomys tridecemlineatus
- Dipodomys ordii
- Rattus norvegicus
- Mus musculus
- Tupaia belangeri
- Otolomus garrettii
- Microcebus murinus
- Tarsius syrichta
- Callithrix jacchus
- Macaca mulatta
- Nomascus leucogenys
- Pongo abelii
- Gorilla gorilla
- Pan troglodytes
- Homo sapiens
- Perkinsus marinus ATCC 50983
- Tetrahymena thermophila
- Paramecium tetraurelia strain d4 2
- Neospora caninum Liverpool
- Toxoplasma gondii
- Cryptosporidium muris RN66
- Cryptosporidium parvum Iowa II
- Cryptosporidium hominis TU502
- Theileria annulata strain Ankara
- Theileria parva strain Muguga
- Plasmodium falciparum
- Plasmodium knowlesi
- Plasmodium vivax
- Plasmodium chabaudi
- Plasmodium yoelii yoelii 17XNL
- Plasmodium berghei
- Phaeodactylum tricorutum
- Thalassiosira pseudonana
- Pythium ultimum
- Albugo liliaceae
- Hyaloperonospora arabidopsidis
- Phytophthora ramorum
- Phytophthora infestans
- Phytophthora sojae
- Trypanosoma brucei
- Trypanosoma cruzi strain CL Brener
- Leishmania braziliensis MHOM BR 75 M2904
- Leishmania mexicana MHOM GT 2001 U1103
- Leishmania major
- Leishmania donovani
- Leishmania infantum JPCM5
- Entamoeba histolytica
- Entamoeba dispar SAW760
- Dicystostellum discoideum
- Dicystostellum purpureum
- Trichomonas vaginalis G3
- Trichomonas vaginalis
- Naegleria gruberi
- Giardia lamblia ATCC 50803

- OG presence
- OG absence
- ◇ Inferred root

Dscore = 0.826

Pvalue = 1.18e-04

AdjPvalue = 1.41e-02

# COG2608

- Arabidopsis thaliana
- Arabidopsis lyrata
- Brassica rapa
- Glycine max
- Populus trichocarpa
- Vitis vinifera
- Solanum tuberosum
- Solanum lycopersicum
- Oryza sativa Indica Group
- Oryza sativa Japonica Group
- Oryza brachyantha
- Oryza glaberrima
- Hordeum vulgare
- Brachypodium distachyon
- Zea mays
- Sorghum bicolor
- Setaria italica
- Musa acuminata
- Selaginella moellendorffii
- Physcomitrella patens
- Ostreococcus tauri
- Ostreococcus lucimarinus CCE9901
- Chlamydomonas reinhardtii
- Cyanidioschyzon merolae
- Encephalitozoon hellem ATCC 50504
- Encephalitozoon intestinalis ATCC 50506
- Encephalitozoon cuniculi GB M1
- Puccinia graminis
- Puccinia triticina
- Ustilago maydis
- Malassezia globosa CBS 7966
- Cryptococcus gattii WM276
- Cryptococcus neoformans var. neoformans JEC21
- Cryptococcus neoformans var. neoformans B 3501A
- Phanerochaete chrysosporium
- Schizophyllum commune H4 B
- Coprinopsis cinerea okayama7\_130
- Laccaria bicolor S238N H82
- Schizosaccharomyces japonicus yFS275
- Schizosaccharomyces pombe
- Clavospora lusitanae ATCC 42720
- Yarrowia lipolytica
- Candida tropicalis MYA 3404
- Candida dubliniensis CD36
- Lodderomyces elongisporus NRRL YB 4239
- Scheffersomyces stipitis CBS 6054
- Meyeromyza guilliermondii ATCC 6260
- Pichia guilliermondii
- Lachancea thermotolerans
- Kluyveromyces lactis NRRL Y 1140
- Saccharomyces cerevisiae
- Zygosaccharomyces rouxii
- Komagataella pastoris GS115
- Vanderwaltozyma polyspora DSM 70294
- Torulopsis delbrueckii
- Candida glabrata CBS 138
- Tetrapispora phaffii CBS 4417
- Naumovozyma dairensis CBS 421
- Naumovozyma castellii CBS 4309
- Eremothecium cymbalariae DBVPG\_7215
- Eremothecium gossypii
- Tuber melanosporum
- Zymoseptoria tritici
- Phaeosphaeria nodorum
- Leptosphaeria maculans
- Pyrenophora tritici repens Pt 1C BFP
- Pyrenophora teres f. teres 0 1
- Botryotinia fuckeliana
- Sclerotinia sclerotiorum
- Verticillium albo atrum VaMs.102
- Fusarium oxysporum
- Hypocrea virens
- Hypocrea jecorina
- Nectria haematococca
- Gibberella moniliformis
- Gibberella zeae PH 1
- Gibberella zeae
- Gaeumannomyces graminis
- Magnaporthe grisea
- Magnaporthe poae
- Magnaporthe oryzae
- Podospora anserina S mat
- Neurospora crassa
- Sordaria macrospora k hell
- Myceliophthora thermophila ATCC 42464
- Chaetomium globosum CBS 148.51
- Thielavia terrestris NRRL 8126
- Uncinocarpus reesii 1704
- Ajellomyces capsulatus NAM1
- Ajellomyces dermatitidis SLH14081
- Paracoccidioides sp. lutzi Pb01
- Coccidioides posadasii C735 delta SOWgp
- Coccidioides immitis RS
- Trichophyton rubrum CBS 118892
- Trichophyton verrucosum HKI 0517
- Arthroderma benhamiae CBS 112371
- Arthroderma gypseum CBS 118893
- Arthroderma otae CBS 113480
- Talaromyces stipitatus ATCC 10500
- Neosartorya fischeri
- Emericella nidulans
- Penicillium chrysogenum Wisconsin 54 1255
- Penicillium marneffei ATCC 18224
- Aspergillus clavatus
- Aspergillus flavus
- Aspergillus oryzae
- Aspergillus niger
- Aspergillus fumigatus
- Aspergillus terreus
- Monosiga brevicollis MX1
- Amphimedon queenslandica
- Trichoplax adhaerens
- Nematostella vectensis
- Hydra magnipapillata
- Schistosoma mansoni
- Trichinella spiralis
- Pristionchus pacificus
- Caenorhabditis brenneri
- Caenorhabditis briggsae
- Caenorhabditis remanei
- Caenorhabditis japonica
- Caenorhabditis elegans
- Hodles scapularis
- Daphnia pulex
- Pediculus humanus
- Acyrtosiphon pisum
- Tribolium castaneum
- Nasonia vitripennis
- Apis mellifera
- Atta cephalotes
- Bombyx mori
- Danaus plexippus
- Heliconia melpomene
- Culex quinquefasciatus
- Hodles aegypti
- Anopheles gambiae
- Anopheles darlingi
- Drosophila virilis
- Drosophila grimshawi
- Drosophila willistoni
- Drosophila pseudoobscura
- Drosophila ananassae
- Drosophila melanogaster
- Drosophila yakuba
- Strongylocentrotus purpuratus
- Branchiostoma floridae
- Ciona intestinalis
- Ciona savignyi
- Petromyzon marinus
- Danio rerio
- Gadus morhua
- Oreochromis niloticus
- Takifugu rubripes
- Tetraodon nigroviridis
- Gasterosteus aculeatus
- Xiphophorus maculatus
- Oryzias latipes
- Latimeria chalumnae
- Xenopus (Silurana) tropicalis
- Pelodiscus sinensis
- Anolis carolinensis
- Taeniopygia guttata
- Gallus gallus
- Meleagris gallopavo
- Ornithorhynchus anatinus
- Monodelphis domestica
- Sarcophilus harrisii
- Macropus eugenii
- Dasyurus novemcinctus
- Loxodonta africana
- Echinosorex tillarii
- Procavia capensis
- Myotis lucifugus
- Pteropus vampyrus
- Sus scrofa
- Tursiops truncatus
- Bos taurus
- Equus caballus
- Felis catus
- Canis lupus familiaris
- Mustela putorius furo
- Alluropoda melanoleuca
- Cryptolegus cuniculus
- Cavia porcellus
- Uctidomys tridecemlineatus
- Dipodomys ordii
- Rattus norvegicus
- Mus musculus
- Tupaia belangerii
- Otolomus garrettii
- Microcebus murinus
- Tarsius syrichta
- Callithrix jacchus
- Macaca mulatta
- Nomascus leucogenys
- Pongo abelii
- Gorilla gorilla
- Pan troglodytes
- Homo sapiens
- Perkinsus marinus ATCC 50983
- Tetrahymena thermophila
- Paramecium tetraurelia strain d4 2
- Neospora caninum Liverpool
- Toxoplasma gondii
- Cryptosporidium muris RN66
- Cryptosporidium parvum Iowa II
- Cryptosporidium hominis TU502
- Theileria annulata strain Ankara
- Theileria parva strain Muguga
- Plasmodium falciparum
- Plasmodium knowlesi
- Plasmodium vivax
- Plasmodium chabaudi
- Plasmodium yoelii yoelii 17XNL
- Plasmodium berghei
- Phaeodactylum tricornutum
- Thalassiosira pseudonana
- Pythium ultimum
- Albugo liliaceae
- Hyaloperonospora arabidopsidis
- Phytophthora ramorum
- Phytophthora infestans
- Phytophthora sojae
- Trypanosoma brucei
- Trypanosoma cruzi strain CL Brener
- Leishmania braziliensis MHOM BR 75 M2904
- Leishmania mexicana MHOM GT 2001 U1103
- Leishmania major
- Leishmania donovani
- Leishmania infantum JPCM5
- Entamoeba histolytica
- Entamoeba dispar SAW760
- Dicystostellum discoideum
- Dicystostellum purpureum
- Trichomonas vaginalis G3
- Trichomonas vaginalis
- Naegleria gruberi
- Giardia lamblia ATCC 50803

- OG presence
- OG absence
- Inferred root

Dscore = 0.844  
Pvalue = 1.27e-04  
AdjPvalue = 1.51e-02

# COG3794

- Arabidopsis thaliana
- Arabidopsis lyrata
- Brassica rapa
- Glycine max
- Populus trichocarpa
- Vitis vinifera
- Solanum tuberosum
- Solanum lycopersicum
- Oryza sativa Indica Group
- Oryza sativa Japonica Group
- Oryza brachyantha
- Oryza glaberrima
- Hordeum vulgare
- Brachypodium distachyon
- Zea mays
- Sorghum bicolor
- Setaria italica
- Musa acuminata
- Selaginella moellendorffii
- Physcomitrella patens
- Ostreococcus tauri
- Ostreococcus lucimarinus CCE9901
- Chlamydomonas reinhardtii
- Cyanidioschyzon merolae
- Encephalitozoon hellem ATCC 50504
- Encephalitozoon intestinalis ATCC 50506
- Encephalitozoon cuniculi GB M1
- Puccinia graminis
- Puccinia triticina
- Ustilago maydis
- Melassezia globosa CBS 7966
- Cryptococcus gattii WM276
- Cryptococcus neoformans var. neoformans JEC21
- Cryptococcus neoformans var. neoformans B 3501A
- Phanerochaete chrysosporium
- Schizophyllum commune H4 B
- Coprinopsis cinerea okayama7\_130
- Laccaria bicolor S238N H82
- Schizosaccharomyces japonicus yFS275
- Schizosaccharomyces pombe
- Clavospora lusitaniae ATCC 42720
- Yarrowia lipolytica
- Candida tropicalis MYA 3404
- Candida dubliniensis CD36
- Lodderomyces elongisporus NRRL YB 4239
- Scheffersomyces stipitis CBS 6054
- Meyeromyza guilliermondii ATCC 6260
- Pichia guilliermondii
- Lachancea thermotolerans
- Kluyveromyces fragilis NRRL Y 1140
- Saccharomyces cerevisiae
- Zygosaccharomyces rouxii
- Komagataella pastoris GS115
- Vanderwaltozyma polyspora DSM 70294
- Torulaspora delbrueckii
- Candida glabrata CBS 138
- Tetrapisispora phaffii CBS 4417
- Naumovozyma dairensis CBS 421
- Naumovozyma castellii CBS 4309
- Eremothecium cymbalariae DBVPG\_7215
- Eremothecium gossypii
- Tuber melanosporum
- Zymoseptoria tritici
- Phaeosphaeria nodorum
- Leptosphaeria maculans
- Pyrenophora tritici repens Pt 1C BFP
- Pyrenophora teres f. teres 0 1
- Botryotinia fuckeliana
- Sclerotinia sclerotiorum
- Verticillium albo atrum VaMs.102
- Fusarium oxysporum
- Hypocrea virens
- Hypocrea jecorina
- Nectria haematococca
- Gibberella moniliformis
- Gibberella zeae PH 1
- Gibberella zeae
- Gaeumannomyces graminis
- Magnaporthe grisea
- Magnaporthe poae
- Magnaporthe oryzae
- Podospora anserina S mat
- Neurospora crassa
- Sordaria macrospora k hell
- Myceliophthora thermophila ATCC 42464
- Chaetomium globosum CBS 148.51
- Thielavia terrestris NRRL 8126
- Uncinocarpus reesii 1704
- Ajellomyces capsulatus Nam1
- Ajellomyces dermatitidis SLH14081
- Paracoccidioides sp. lutzi Fb01
- Coccidioides posadasii C735 delta SOWgp
- Coccidioides immitis RS
- Trichophyton rubrum CBS 118892
- Trichophyton verrucosum HKI 0517
- Arthroderma benhamiae CBS 112371
- Arthroderma gypseum CBS 118893
- Arthroderma otae CBS 113480
- Talaromyces stipitatus ATCC 10500
- Neosartorya fischeri
- Emericella nidulans
- Penicillium chrysogenum Wisconsin 54 1255
- Penicillium marneffei ATCC 18224
- Aspergillus clavatus
- Aspergillus flavus
- Aspergillus oryzae
- Aspergillus niger
- Aspergillus fumigatus
- Aspergillus terreus
- Monosiga brevicollis MX1
- Amphimedon queenslandica
- Trichoplax adhaerens
- Nematostella vectensis
- Hydra magnipapillata
- Schistosoma mansoni
- Trichiella spiralis
- Pristionchus pacificus
- Caenorhabditis breneri
- Caenorhabditis briggsae
- Caenorhabditis remanei
- Caenorhabditis japonica
- Caenorhabditis elegans
- Ixodes scapularis
- Daphnia pulex
- Pediculus humanus
- Acyrthosiphon pisum
- Tribolium castaneum
- Nasonia vitripennis
- Apis mellifera
- Atta cephalotes
- Bombyx mori
- Danaus plexippus
- Heliconius melpomene
- Culex quinquefasciatus
- Aedes aegypti
- Anopheles gambiae
- Anopheles darlingi
- Drosophila virilis
- Drosophila grimshawi
- Drosophila willistoni
- Drosophila pseudoobscura
- Drosophila ananassae
- Drosophila melanogaster
- Drosophila yakuba
- Strongylocentrotus purpuratus
- Branchiostoma floridae
- Ciona intestinalis
- Ciona savignyi
- Petromyzon marinus
- Danio rerio
- Gadus morhua
- Oreochromis niloticus
- Takifugu rubripes
- Tetraodon nigroviridis
- Gasterosteus aculeatus
- Xiphophorus maculatus
- Oryzias latipes
- Latimeria chalumnae
- Xenopus (Silurana) tropicalis
- Pelodiscus sinensis
- Anolis carolinensis
- Taeniopygia guttata
- Gallus gallus
- Meleagris gallopavo
- Ornithorhynchus anatinus
- Monodelphis domestica
- Sarcophilus harrisii
- Macropus eugenii
- Dasyurus novemcinctus
- Loxodonta africana
- Echinops telfairii
- Procavia capensis
- Myotis lucifugus
- Pteropus vampyrus
- Sus scrofa
- Tursiops truncatus
- Bos taurus
- Equus caballus
- Felis catus
- Canis lupus familiaris
- Mustela putorius furo
- Alluropoda melanoleuca
- Cryptolestes cucullatus
- Cavia porcellus
- Ictidomys tridecemlineatus
- Dipodomys ordii
- Rattus norvegicus
- Mus musculus
- Tupaia belangeri
- Otolomus garrettii
- Microcebus murinus
- Tarsius syrichta
- Callithrix jacchus
- Macaca mulatta
- Nomascus leucogenys
- Pongo abelii
- Gorilla gorilla
- Pan troglodytes
- Homo sapiens
- Perkinus marinus ATCC 50983
- Tetrahymena thermophila
- Paramecium tetraurelia strain d4 2
- Neospora caninum Liverpool
- Toxoplasma gondii
- Cryptosporidium muris RN66
- Cryptosporidium parvum Iowa II
- Cryptosporidium hominis TU502
- Theileria annulata strain Ankara
- Theileria parva strain Muguga
- Plasmodium falciparum
- Plasmodium knowlesi
- Plasmodium vivax
- Plasmodium chabaudi
- Plasmodium yoelii yoelii 17XNL
- Plasmodium berghei
- Phaeodactylum tricornutum
- Thalassiosira pseudonana
- Pythium ultimum
- Albugo liliaceae
- Hyaloperonospora arabidopsidis
- Phytophthora ramorum
- Phytophthora infestans
- Phytophthora sojae
- Trypanosoma brucei
- Trypanosoma cruzi strain CL Brener
- Leishmania braziliensis MHOM BR 75 M2904
- Leishmania mexicana MHOM GT 2001 U1103
- Leishmania major
- Leishmania donovani
- Leishmania infantum JPCM5
- Entamoeba histolytica
- Entamoeba dispar SAW760
- Dictyostellium discoideum
- Dictyostellium purpureum
- Trichomonas vaginalis G3
- Trichomonas vaginalis
- Naegleria gruberi
- Giardia lamblia ATCC 50803

- OG presence
- OG absence
- ◊ Inferred root

Dscore = 0.989

Pvalue = 1.03e-05

AdjPvalue = 1.22e-03

# COG4243

- Arabidopsis thaliana
- Arabidopsis lyrata
- Brassica rapa
- Glycine max
- Populus trichocarpa
- Vitis vinifera
- Solanum tuberosum
- Solanum lycopersicum
- Oryza sativa Indica Group
- Oryza sativa Japonica Group
- Oryza brachyantha
- Oryza glaberrima
- Hordeum vulgare
- Brachypodium distachyon
- Zea mays
- Sorghum bicolor
- Setaria italica
- Musa acuminata
- Selaginella moellendorffii
- Physcomitrella patens
- Streptococcus tauri
- Streptococcus lucimarinus CCE9901
- Chlamydomonas reinhardtii
- Cyanidioschyzon merolae
- Encephalitozoon hellem ATCC 50504
- Encephalitozoon intestinalis ATCC 50506
- Encephalitozoon cuniculi GB M1
- Puccinia graminis
- Puccinia triticina
- Ustilago maydis
- Malassezia globosa CBS 7966
- Cryptococcus gattii WM276
- Cryptococcus neoformans var. neoformans JEC21
- Cryptococcus neoformans var. neoformans B 3501A
- Phanerochaete chrysosporium
- Schizophyllum commune H4 B
- Coprinopsis cinerea okayama7\_130
- Laccaria bicolor S238N H82
- Schizosaccharomyces japonicus yFS275
- Schizosaccharomyces pombe
- Clavospora lusitanae ATCC 42720
- Yarrowia lipolytica
- Candida tropicalis MYA 3404
- Candida dubliniensis CD36
- Lodderomyces elongisporus NRRL YB 4239
- Scheffersomyces stipitis CBS 6054
- Meyeromyza guilliermondii ATCC 6260
- Pichia guilliermondii
- Lachancea thermotolerans
- Kluyveromyces fragilis NRRL Y 1140
- Saccharomyces cerevisiae
- Zygosaccharomyces rouxii
- Komagataella pastoris GS115
- Vanderwaltozyma polyspora DSM 70294
- Torulopsis delbrueckii
- Candida glabrata CBS 138
- Tetrapispora phaffii CBS 4417
- Naumovozyma dairenensis CBS 421
- Naumovozyma castellii CBS 4309
- Eremothecium cymbalariae DBVPG\_7215
- Eremothecium gossypii
- Tuber melanosporum
- Zymoseptoria tritici
- Phaeosphaeria nodorum
- Leptosphaeria maculans
- Pyrenophora tritici repens Pt 1C BFP
- Pyrenophora teres f. teres 0 1
- Botryotinia fuckeliana
- Sclerotinia sclerotiorum
- Verticillium albo atrum VaMs.102
- Fusarium oxysporum
- Hypocrea virens
- Hypocrea jecorina
- Nectria haematococca
- Gibberella moniliformis
- Gibberella zeae PH 1
- Gibberella zeae
- Gaeumannomyces graminis
- Magnaporthe grisea
- Magnaporthe poae
- Magnaporthe oryzae
- Podospora anserina S mat
- Neurospora crassa
- Sordaria macrospora k hell
- Myceliophthora thermophila ATCC 42464
- Chaetomium globosum CBS 148.51
- Thielavia terrestris NRRL 8126
- Uncinocarpus reesii 1704
- Ajellomyces capsulatus Nam1
- Ajellomyces dermatitidis SLH14081
- Paracoccidioides sp. lutzi Fb01
- Coccidioides posadasii C735 delta SOWgp
- Coccidioides immitis RS
- Trichophyton rubrum CBS 118892
- Trichophyton verrucosum HKI 0517
- Arthroderma benhamiae CBS 112371
- Arthroderma gypseum CBS 118893
- Arthroderma otae CBS 113480
- Talaromyces stipitatus ATCC 10500
- Neosartorya fischeri
- Emericella nidulans
- Penicillium chrysogenum Wisconsin 54 1255
- Penicillium marneffei ATCC 18224
- Aspergillus clavatus
- Aspergillus flavus
- Aspergillus oryzae
- Aspergillus niger
- Aspergillus fumigatus
- Aspergillus terreus
- Monosiga brevicollis MX1
- Amphimedon queenslandica
- Trichoplax adhaerens
- Nematostella vectensis
- Hydra magnipapillata
- Schistosoma mansoni
- Trichiella spiralis
- Pristionchus pacificus
- Caenorhabditis breneri
- Caenorhabditis briggsae
- Caenorhabditis remanei
- Caenorhabditis japonica
- Caenorhabditis elegans
- Ixodes scapularis
- Daphnia pulex
- Pediculus humanus
- Acyrthosiphon pisum
- Tribolium castaneum
- Nasonia vitripennis
- Apis mellifera
- Atta cephalotes
- Bombyx mori
- Danaus plexippus
- Heliconius melpomene
- Culex quinquefasciatus
- Aedes aegypti
- Anopheles gambiae
- Anopheles darlingi
- Drosophila virilis
- Drosophila grimshawi
- Drosophila willistoni
- Drosophila pseudoobscura
- Drosophila ananassae
- Drosophila melanogaster
- Drosophila yakuba
- Strongylocentrotus purpuratus
- Branchiostoma floridae
- Ciona intestinalis
- Ciona savignyi
- Petromyzon marinus
- Danio rerio
- Gadus morhua
- Oreochromis niloticus
- Takifugu rubripes
- Tetraodon nigroviridis
- Gasterosteus aculeatus
- Xiphophorus maculatus
- Oryzias latipes
- Latimeria chalumnae
- Xenopus (Silurana) tropicalis
- Pelodiscus sinensis
- Anolis carolinensis
- Taeniopygia guttata
- Gallus gallus
- Meleagris gallopavo
- Ornithorhynchus anatinus
- Monodelphis domestica
- Sarcophilus harrisii
- Macropus eugenii
- Dasyurus novemcinctus
- Loxodonta africana
- Echinops telitarii
- Procavia capensis
- Myotis lucifugus
- Pteropus vampyrus
- Sus scrofa
- Tursiops truncatus
- Bos taurus
- Equus caballus
- Felis catus
- Canis lupus familiaris
- Mustela putorius furo
- Alluropoda melanoleuca
- Cryptolestes cucullatus
- Cavia porcellus
- Ictidomys tridecemlineatus
- Dipodomys ordii
- Rattus norvegicus
- Mus musculus
- Tupaia belangeri
- Otolomus garrettii
- Microcebus murinus
- Tarsius syrichta
- Callithrix jacchus
- Macaca mulatta
- Nomascus leucogenys
- Pongo abelii
- Gorilla gorilla
- Pan troglodytes
- Homo sapiens
- Perkinus marinus ATCC 50983
- Tetrahymena thermophila
- Paramecium tetraurelia strain d4 2
- Neospora caninum Liverpool
- Toxoplasma gondii
- Cryptosporidium muris RN66
- Cryptosporidium parvum Iowa II
- Cryptosporidium hominis TU502
- Theileria annulata strain Ankara
- Theileria parva strain Muguga
- Plasmodium falciparum
- Plasmodium knowlesi
- Plasmodium vivax
- Plasmodium chabaudi
- Plasmodium yoelii yoelii 17XNL
- Plasmodium berghei
- Phaeodactylum tricoratum
- Thalassiosira pseudonana
- Pythium ultimum
- Albugo liliaceae
- Hyaloperonospora arabidopsidis
- Phytophthora ramorum
- Phytophthora infestans
- Phytophthora sojae
- Trypanosoma brucei
- Trypanosoma cruzi strain CL Brener
- Leishmania braziliensis MHOM BR 75 M2904
- Leishmania mexicana MHOM GT 2001 U1103
- Leishmania major
- Leishmania donovani
- Leishmania infantum JPCM5
- Entamoeba histolytica
- Entamoeba dispar SAW760
- Dictyostellium discoideum
- Dictyostellium purpureum
- Trichomonas vaginalis G3
- Trichomonas vaginalis
- Naegleria gruberi
- Giardia lamblia ATCC 50803

- OG presence
- OG absence
- ◆ Inferred root

Dscore = 0.956

Pvalue = 2.11e-05

AdjPvalue = 2.51e-03

- Arabidopsis thaliana
- Arabidopsis lyrata
- Brassica rapa
- Glycine max
- Populus trichocarpa
- Vitis vinifera
- Solanum tuberosum
- Solanum lycopersicum
- Oryza sativa Indica Group
- Oryza sativa Japonica Group
- Oryza brachyantha
- Oryza glaberrima
- Hordeum vulgare
- Brachypodium distachyon
- Zea mays
- Sorghum bicolor
- Setaria italica
- Musa acuminata
- Selaginella moellendorffii
- Physcomitrella patens
- Ostreococcus tauri
- Ostreococcus lucimarinus CCE9901
- Chlamydomonas reinhardtii
- Cyanidioschyzon merolae
- Encephalitozoon hellem ATCC 50504
- Encephalitozoon intestinalis ATCC 50506
- Encephalitozoon cuniculi GB M1
- Puccinia graminis
- Puccinia triticina
- Ustilago maydis
- Malassezia globosa CBS 7966
- Cryptococcus gattii WM276
- Cryptococcus neoformans var. neoformans JEC21
- Cryptococcus neoformans var. neoformans B 3501A
- Phanerochaete chrysosporium
- Schizophyllum commune H4 B
- Coprinopsis cinerea okayama7\_130
- Laccaria bicolor S238N H82
- Schizosaccharomyces japonicus yFS275
- Schizosaccharomyces pombe
- Clavospora lusitanae ATCC 42720
- Yarrowia lipolytica
- Candida tropicalis MYA 3404
- Candida dubliniensis CD36
- Lodderomyces elongisporus NRRL YB 4239
- Scheffersomyces stipitis CBS 6054
- Meyeromyza guilliermondii ATCC 6260
- Pichia guilliermondii
- Lachancea thermotolerans
- Kluyveromyces lactis NRRL Y 1140
- Saccharomyces cerevisiae
- Zygosaccharomyces rouxii
- Komagataella pastoris GS115
- Vanderwaltozyma polyspora DSM 70294
- Torulopsis delbrueckii
- Candida glabrata CBS 138
- Tetrapispora phaffii CBS 4417
- Naumovozyma dairenensis CBS 421
- Naumovozyma castellii CBS 4309
- Eremothecium cymbalariae DBVPG\_7215
- Eremothecium gossypii
- Tuber melanosporum
- Zymoseptoria tritici
- Phaeosphaeria nodorum
- Leptosphaeria maculans
- Pyrenophora tritici repens Pt 1C BFP
- Pyrenophora teres f. teres 0 1
- Botryotinia fuckeliana
- Sclerotinia sclerotiorum
- Verticillium albo atrum VaMs.102
- Fusarium oxysporum
- Hypocrea virens
- Hypocrea jecorina
- Nectria haematococca
- Gibberella moniliformis
- Gibberella zeae PH 1
- Gibberella zeae
- Gaeumannomyces graminis
- Magnaporthe grisea
- Magnaporthe poae
- Magnaporthe oryzae
- Podospora anserina S mat
- Neurospora crassa
- Sordaria macrospora k hell
- Myceliophthora thermophila ATCC 42464
- Chaetomium globosum CBS 148.51
- Thielavia terrestris NRRL 8126
- Uncinocarpus reesii 1704
- Ajellomyces capsulatus Nam1
- Ajellomyces dermatitidis SLH14081
- Paracoccidioides sp. lutzi Pb01
- Coccidioides posadasii C735 delta SOWgp
- Coccidioides immitis RS
- Trichophyton rubrum CBS 118892
- Trichophyton verrucosum HKI 0517
- Arthroderma benhamiae CBS 112371
- Arthroderma gypseum CBS 118893
- Arthroderma otae CBS 113480
- Talaromyces stipitatus ATCC 10500
- Neosartorya fischeri
- Emericella nidulans
- Penicillium chrysogenum Wisconsin 54 1255
- Penicillium marneffei ATCC 18224
- Aspergillus clavatus
- Aspergillus flavus
- Aspergillus oryzae
- Aspergillus niger
- Aspergillus fumigatus
- Aspergillus terreus
- Monosiga brevicollis MX1
- Amphimedon queenslandica
- Trichoplax adhaerens
- Nematostella vectensis
- Hydra magnipapillata
- Schistosoma mansoni
- Trichinella spiralis
- Pristionchus pacificus
- Caenorhabditis brenneri
- Caenorhabditis briggsae
- Caenorhabditis remanei
- Caenorhabditis japonica
- Caenorhabditis elegans
- Xodes scapularis
- Daphnia pulex
- Pediculus humanus
- Acyrtosiphon pisum
- Tribolium castaneum
- Nasonia vitripennis
- Apis mellifera
- Atta cephalotes
- Bombyx mori
- Danaus plexippus
- Heliconia melpomene
- Culex quinquefasciatus
- Xodes aegypti
- Anopheles gambiae
- Anopheles darlingi
- Drosophila virilis
- Drosophila grimshawi
- Drosophila willistoni
- Drosophila pseudoobscura
- Drosophila ananassae
- Drosophila melanogaster
- Drosophila yakuba
- Strongylocentrotus purpuratus
- Branchiostoma floridae
- Ciona intestinalis
- Ciona savignyi
- Petromyzon marinus
- Danio rerio
- Gadus morhua
- Oreochromis niloticus
- Takifugu rubripes
- Tetraodon nigroviridis
- Gasterosteus aculeatus
- Xiphophorus maculatus
- Oryzias latipes
- Latimeria chalumnae
- Xenopus (Silurana) tropicalis
- Pelodiscus sinensis
- Anolis carolinensis
- Taeniopygia guttata
- Gallus gallus
- Meleagris gallopavo
- Ornithorhynchus anatinus
- Monodelphis domestica
- Sarcophilus harrisii
- Macropus eugenii
- Dasyurus novemcinctus
- Loxodonta africana
- Echinosorex tillarii
- Procavia capensis
- Myotis lucifugus
- Pteropus vampyrus
- Sus scrofa
- Tursiops truncatus
- Bos taurus
- Equus caballus
- Felis catus
- Canis lupus familiaris
- Mustela putorius furo
- Alluropoda melanoleuca
- Cryptolegus cuniculatus
- Cavia porcellus
- Mictodymys tridecemlineatus
- Dipodomys ordii
- Rattus norvegicus
- Mus musculus
- Tupaia belangerii
- Otolomus garrettii
- Microcebus murinus
- Tarsius syrichta
- Callithrix jacchus
- Macaca mulatta
- Nomascus leucogenys
- Pongo abelii
- Gorilla gorilla
- Pan troglodytes
- Homo sapiens
- Perkinsus marinus ATCC 50983
- Tetrahymena thermophila
- Paramecium tetraurelia strain d4 2
- Neospora caninum Liverpool
- Toxoplasma gondii
- Cryptosporidium muris RN66
- Cryptosporidium parvum Iowa II
- Cryptosporidium hominis TU502
- Theileria annulata strain Ankara
- Theileria parva strain Muguga
- Plasmodium falciparum
- Plasmodium knowlesi
- Plasmodium vivax
- Plasmodium chabaudi
- Plasmodium yoelii yoelii 17XNL
- Plasmodium berghei
- Phaeodactylum tricornutum
- Thalassiosira pseudonana
- Pythium ultimum
- Albugo laluchii
- Hyaloperonospora arabidopsidis
- Phytophthora ramorum
- Phytophthora infestans
- Phytophthora sojae
- Trypanosoma brucei
- Trypanosoma cruzi strain CL Brener
- Leishmania braziliensis MHOM BR 75 M2904
- Leishmania mexicana MHOM GT 2001 U1103
- Leishmania major
- Leishmania donovani
- Leishmania infantum JPCM5
- Entamoeba histolytica
- Entamoeba dispar SAW760
- Dicystostellum discoideum
- Dicystostellum purpureum
- Trichomonas vaginalis G3
- Trichomonas vaginalis
- Naegleria gruberi
- Giardia lamblia ATCC 50803

- OG presence
- OG absence
- Inferred root

Dscore = 0.793  
Pvalue = 6.78e-04  
AdjPvalue = 8.07e-02

# COG5601

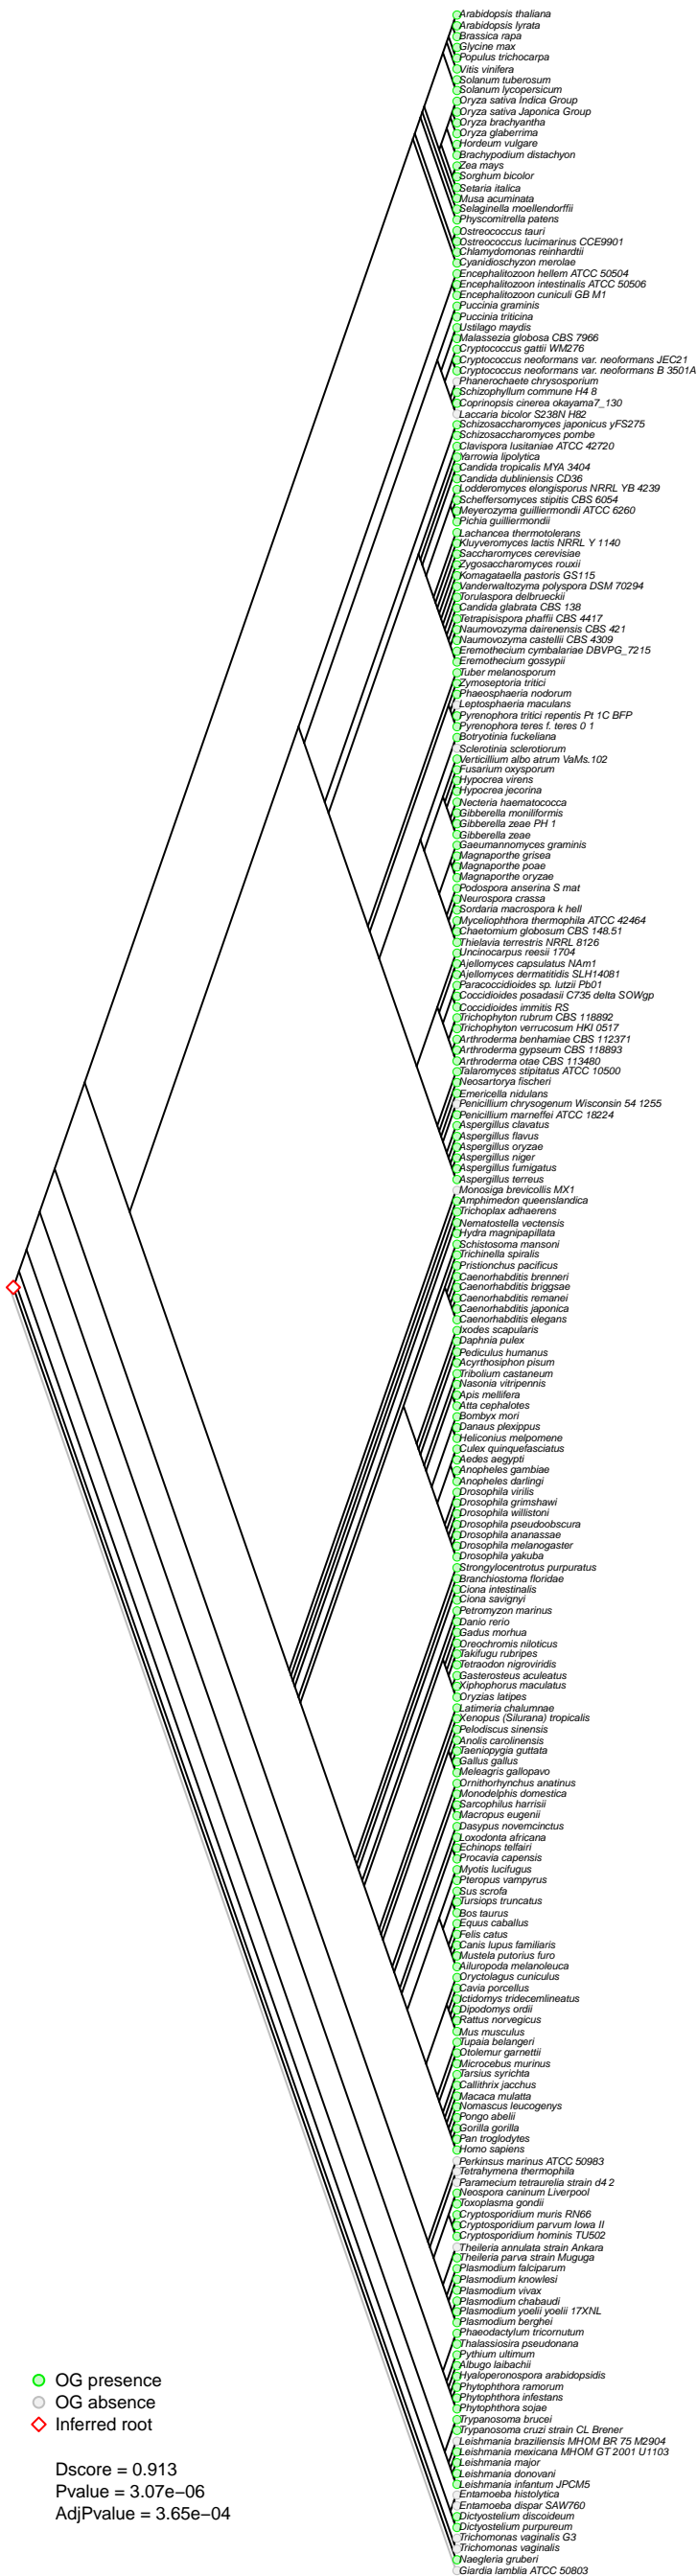



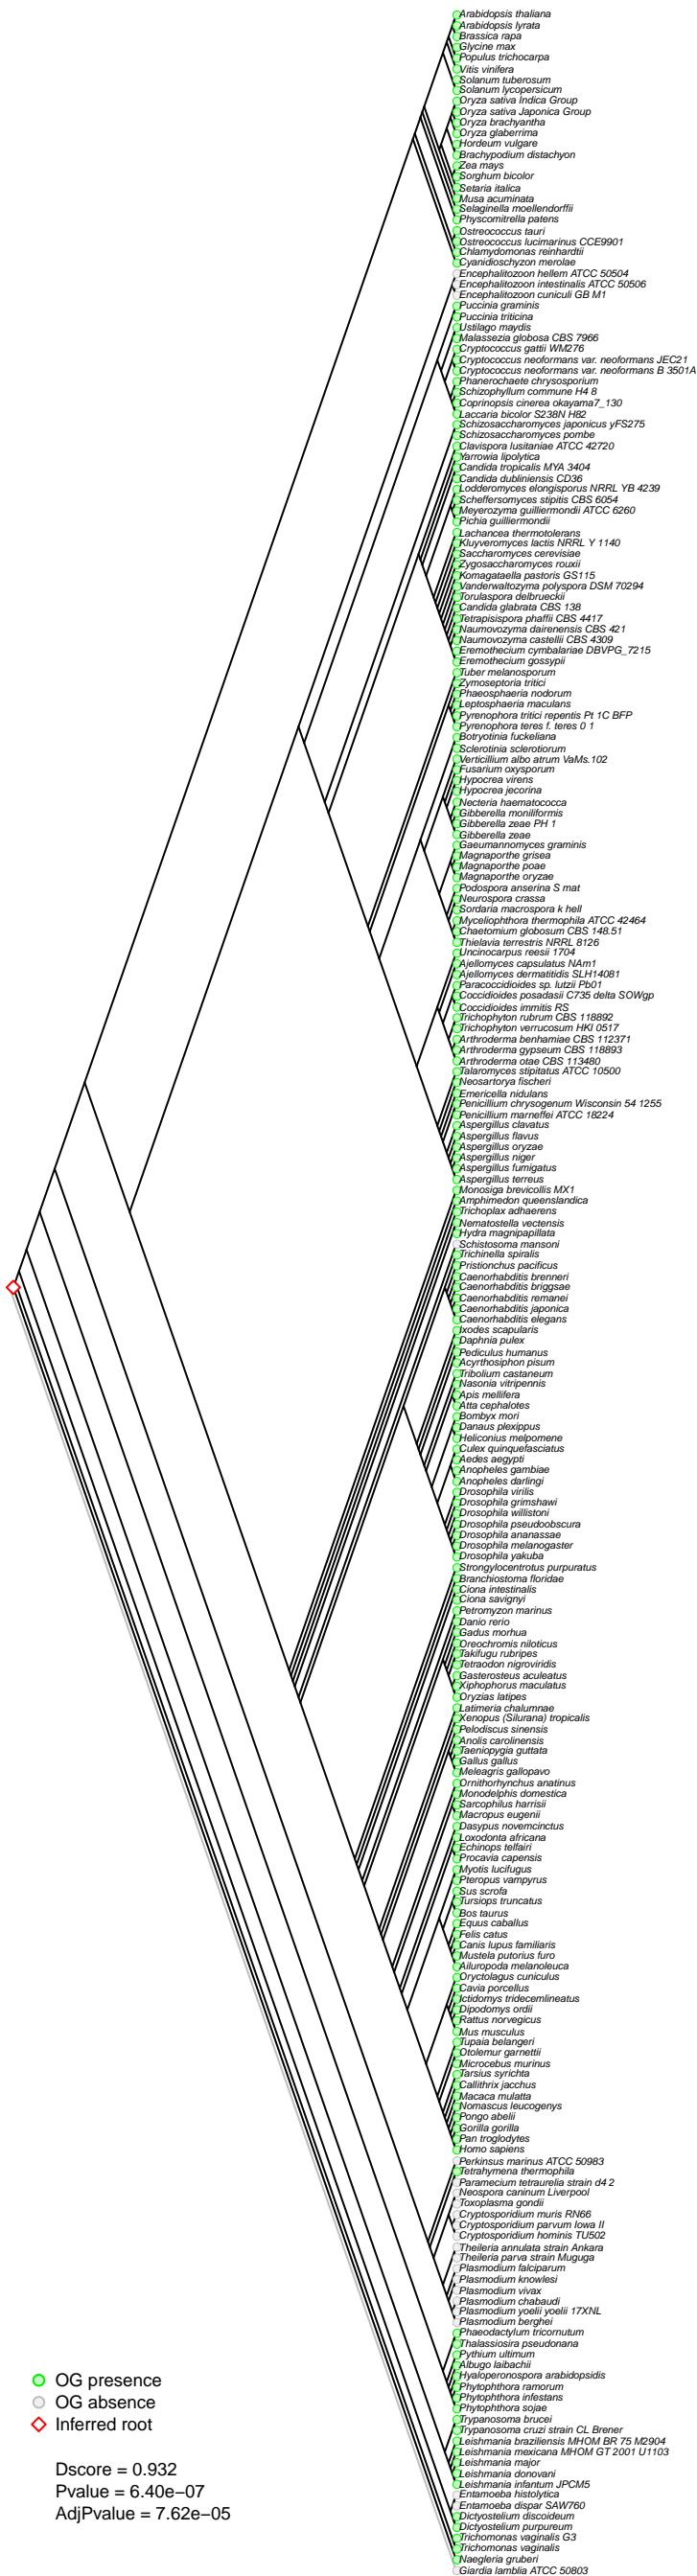

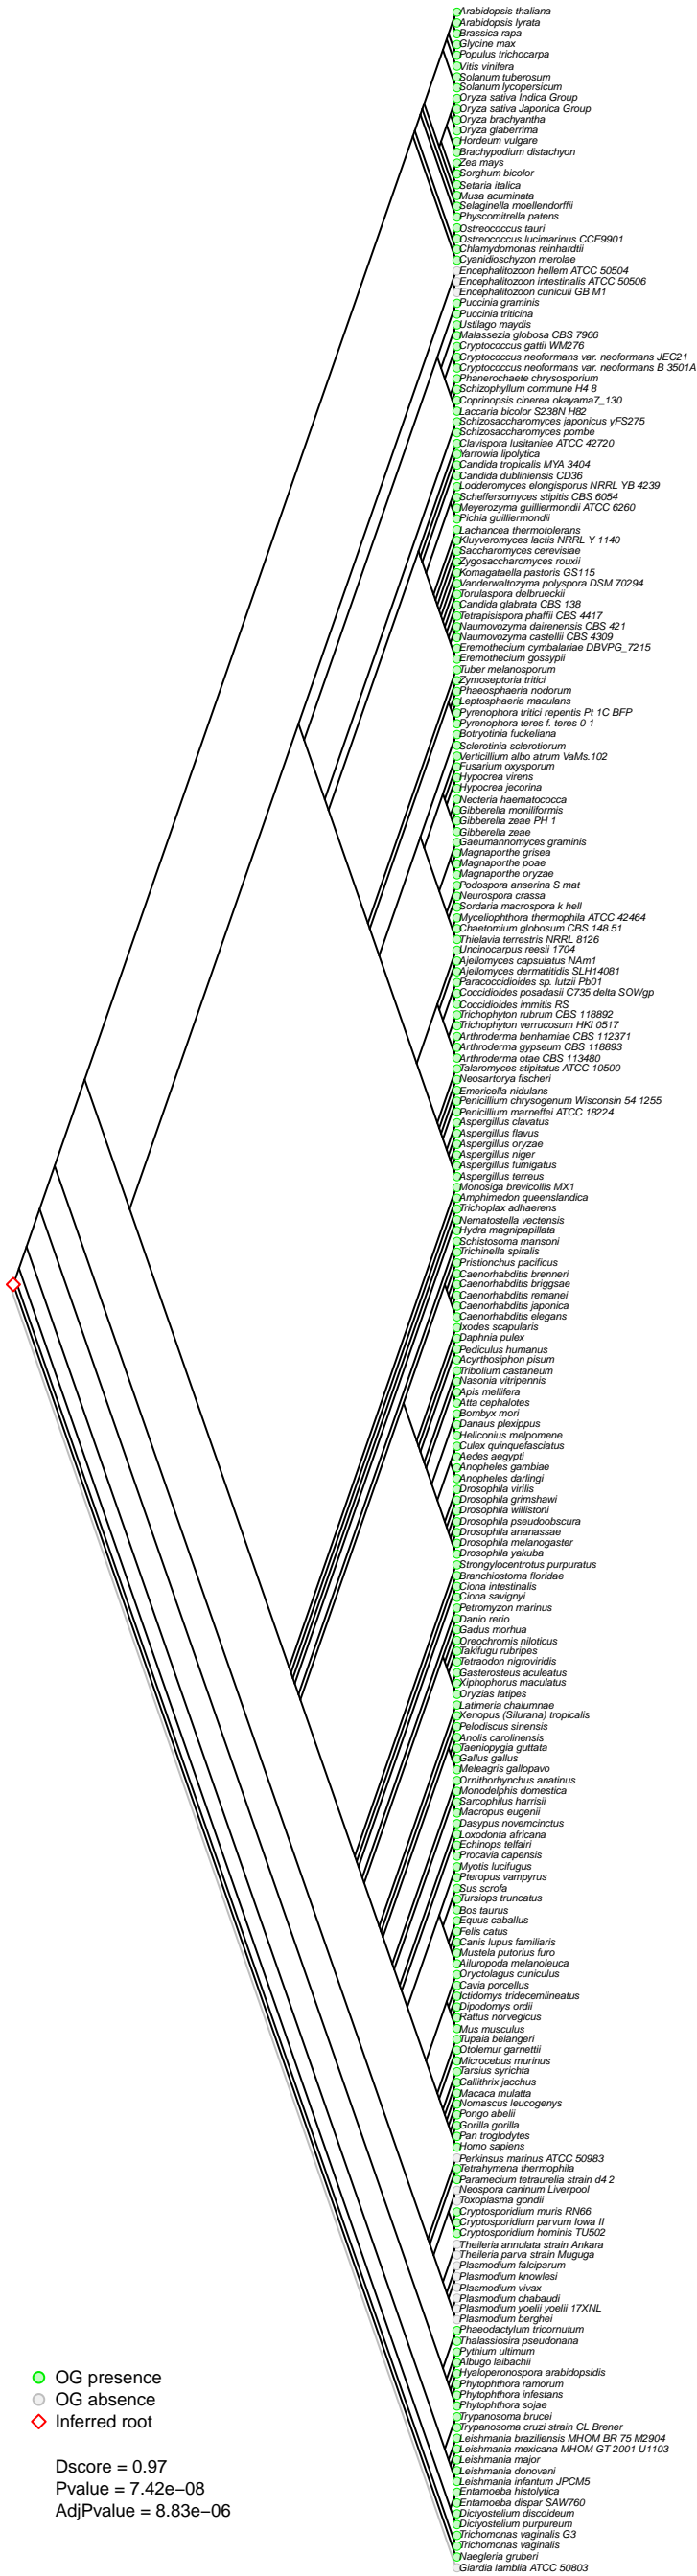

- Arabis thaliana
- Arabidopsis lyrata
- Brassica rapa
- Glycine max
- Populus trichocarpa
- Vitis vinifera
- Solanum tuberosum
- Solanum lycopersicum
- Oryza sativa Indica Group
- Oryza sativa Japonica Group
- Oryza brachyantha
- Oryza glaberrima
- Hordeum vulgare
- Brachypodium distachyon
- Zea mays
- Sorghum bicolor
- Setaria italica
- Musa acuminata
- Selaginella moellendorffii
- Physcomitrella patens
- Ostreococcus tauri
- Ostreococcus lucimarinus CCE9901
- Chlamydomonas reinhardtii
- Cyanidioschyzon merolae
- Encephalitozoon hellem ATCC 50504
- Encephalitozoon intestinalis ATCC 50506
- Encephalitozoon cuniculi GB M1
- Puccinia graminis
- Puccinia triticina
- Ustilago maydis
- Malassezia globosa CBS 7966
- Cryptococcus gattii WM276
- Cryptococcus neoformans var. neoformans JEC21
- Cryptococcus neoformans var. neoformans B 3501A
- Phanerochaete chrysosporium
- Schizophyllum commune H4 B
- Coprinopsis cinerea okayama7\_130
- Laccaria bicolor S238N H82
- Schizosaccharomyces japonicus yFS275
- Schizosaccharomyces pombe
- Clavospora lusitanae ATCC 42720
- Yarrowia lipolytica
- Candida tropicalis MYA 3404
- Candida dubliniensis CD36
- Lodderomyces elongisporus NRRL YB 4239
- Scheffersomyces stipitis CBS 6054
- Meyerozyma guilliermondii ATCC 6260
- Pichia guilliermondii
- Lachancea thermotolerans
- Kluyveromyces fragilis NRRL Y 1140
- Saccharomyces cerevisiae
- Zygosaccharomyces rouxii
- Komagataella pastoris GS115
- Vanderwaltozyma polyspora DSM 70294
- Torulopsis delbrueckii
- Candida glabrata CBS 138
- Tetrapispora phaffii CBS 4417
- Naumovozyma dairensis CBS 421
- Naumovozyma castellii CBS 4309
- Eremothecium cymbalariae DBVPG\_7215
- Eremothecium gossypii
- Tuber melanosporum
- Zyoseptoria tritici
- Phaeosphaeria nodorum
- Leptosphaeria maculans
- Pyrenophora tritici repens Pt 1C BFP
- Pyrenophora teres f. teres 0 1
- Ectryzia fackeliana
- Sclerotinia sclerotiorum
- Verticillium albo atrum VaMs.102
- Fusarium oxysporum
- Hypocrea virens
- Hypocrea jecorina
- Nectria haematococca
- Gibberella moniliformis
- Gibberella zeae PH 1
- Gibberella zeae
- Gaeumannomyces graminis
- Magnaporthe grisea
- Magnaporthe poae
- Magnaporthe oryzae
- Podospora anserina S mat
- Neurospora crassa
- Sordaria macrospora k hell
- Myceliophthora thermophila ATCC 42464
- Chaetomium globosum CBS 148.51
- Thielavia terrestris NRRL 8126
- Uncinocarpus reesii 1704
- Ajellomyces capsulatus Nam1
- Ajellomyces dermatitidis SLH14081
- Paracoccidioides sp. lutzi Fb01
- Coccidioides posadasii C735 delta SOWgp
- Coccidioides immitis RS
- Trichophyton rubrum CBS 118892
- Trichophyton verrucosum HKI 0517
- Arthroderma benhamiae CBS 112371
- Arthroderma gypseum CBS 118893
- Arthroderma otae CBS 113480
- Talaromyces stipitatus ATCC 10500
- Neosartorya fischeri
- Emericella nidulans
- Penicillium chrysogenum Wisconsin 54 1255
- Penicillium marneffei ATCC 18224
- Aspergillus clavatus
- Aspergillus flavus
- Aspergillus oryzae
- Aspergillus niger
- Aspergillus fumigatus
- Aspergillus terreus
- Monosiga brevicollis MX1
- Amphimedon queenslandica
- Trichoplax adhaerens
- Nematostella vectensis
- Hydra magnipapillata
- Schistosoma mansoni
- Trichinella spiralis
- Pristionchus pacificus
- Caenorhabditis brenneri
- Caenorhabditis briggsae
- Caenorhabditis remanei
- Caenorhabditis japonica
- Caenorhabditis elegans
- Oxodes scapularis
- Daphnia pulex
- Pediculus humanus
- Acyrtosiphon pisum
- Tribolium castaneum
- Nasonia vitripennis
- Apis mellifera
- Atta cephalotes
- Bombyx mori
- Danaus plexippus
- Heliconia melpomene
- Culex quinquefasciatus
- Aedes aegypti
- Anopheles gambiae
- Anopheles darlingi
- Drosophila virilis
- Drosophila grimshawi
- Drosophila willistoni
- Drosophila pseudoobscura
- Drosophila ananassae
- Drosophila melanogaster
- Drosophila yakuba
- Strongylocentrotus purpuratus
- Branchiostoma floridae
- Ciona intestinalis
- Ciona savignyi
- Petromyzon marinus
- Danio rerio
- Gadus morhua
- Oreochromis niloticus
- Takifugu rubripes
- Tetraodon nigroviridis
- Gasterosteus aculeatus
- Xiphophorus maculatus
- Dryas latipes
- Latimeria chalumnae
- Xenopus (Silurana) tropicalis
- Pelodiscus sinensis
- Anolis carolinensis
- Taeniopygia guttata
- Gallus gallus
- Meleagris gallopavo
- Ornithorhynchus anatinus
- Monodelphis domestica
- Sarcophilus harrisii
- Macropus eugenii
- Dasyurus novemcinctus
- Loxodonta africana
- Echinosorex tillarii
- Procavia capensis
- Myotis lucifugus
- Pteropus vampyrus
- Sus scrofa
- Tursiops truncatus
- Bos taurus
- Equus caballus
- Felis catus
- Canis lupus familiaris
- Mustela putorius furo
- Alluropoda melanoleuca
- Cryptolepis canaliculatus
- Cavia porcellus
- Ictidomys tridecemlineatus
- Dipodomys ordii
- Rattus norvegicus
- Mus musculus
- Tupaia belangeri
- Otolomus garretti
- Microcebus murinus
- Tarsius syrichta
- Callithrix jacchus
- Macaca mulatta
- Nomascus leucogenys
- Pongo abelii
- Gorilla gorilla
- Pan troglodytes
- Homo sapiens
- Perkinsus marinus ATCC 50983
- Tetrahymena thermophila
- Paramecium tetraurelia strain d4 2
- Neospora caninum Liverpool
- Toxoplasma gondii
- Cryptosporidium muris RN66
- Cryptosporidium parvum Iowa II
- Cryptosporidium hominis TU502
- Theileria annulata strain Ankara
- Theileria parva strain Muguga
- Plasmodium falciparum
- Plasmodium knowlesi
- Plasmodium vivax
- Plasmodium chabaudi
- Plasmodium yoelii yoelii 17XNL
- Plasmodium berghei
- Phaeodactylum tricornutum
- Thalassiosira pseudonana
- Pythium ultimum
- Albugo liliaceae
- Hyaloperonospora arabidopsidis
- Phytophthora ramorum
- Phytophthora infestans
- Phytophthora sojae
- Trypanosoma brucei
- Trypanosoma cruzi strain CL Brener
- Leishmania braziliensis MHOM BR 75 M2904
- Leishmania mexicana MHOM GT 2001 U1103
- Leishmania major
- Leishmania donovani
- Leishmania infantum JPCM5
- Entamoeba histolytica
- Entamoeba dispar SAW760
- Dicystostellum discoideum
- Dicystostellum purpureum
- Trichomonas vaginalis G3
- Trichomonas vaginalis
- Naegleria gruberi
- Giardia lamblia ATCC 50803

- OG presence
- OG absence
- Inferred root

Dscore = 0.73  
Pvalue = 1.36e-03  
AdjPvalue = 1.62e-01

# NOG04600

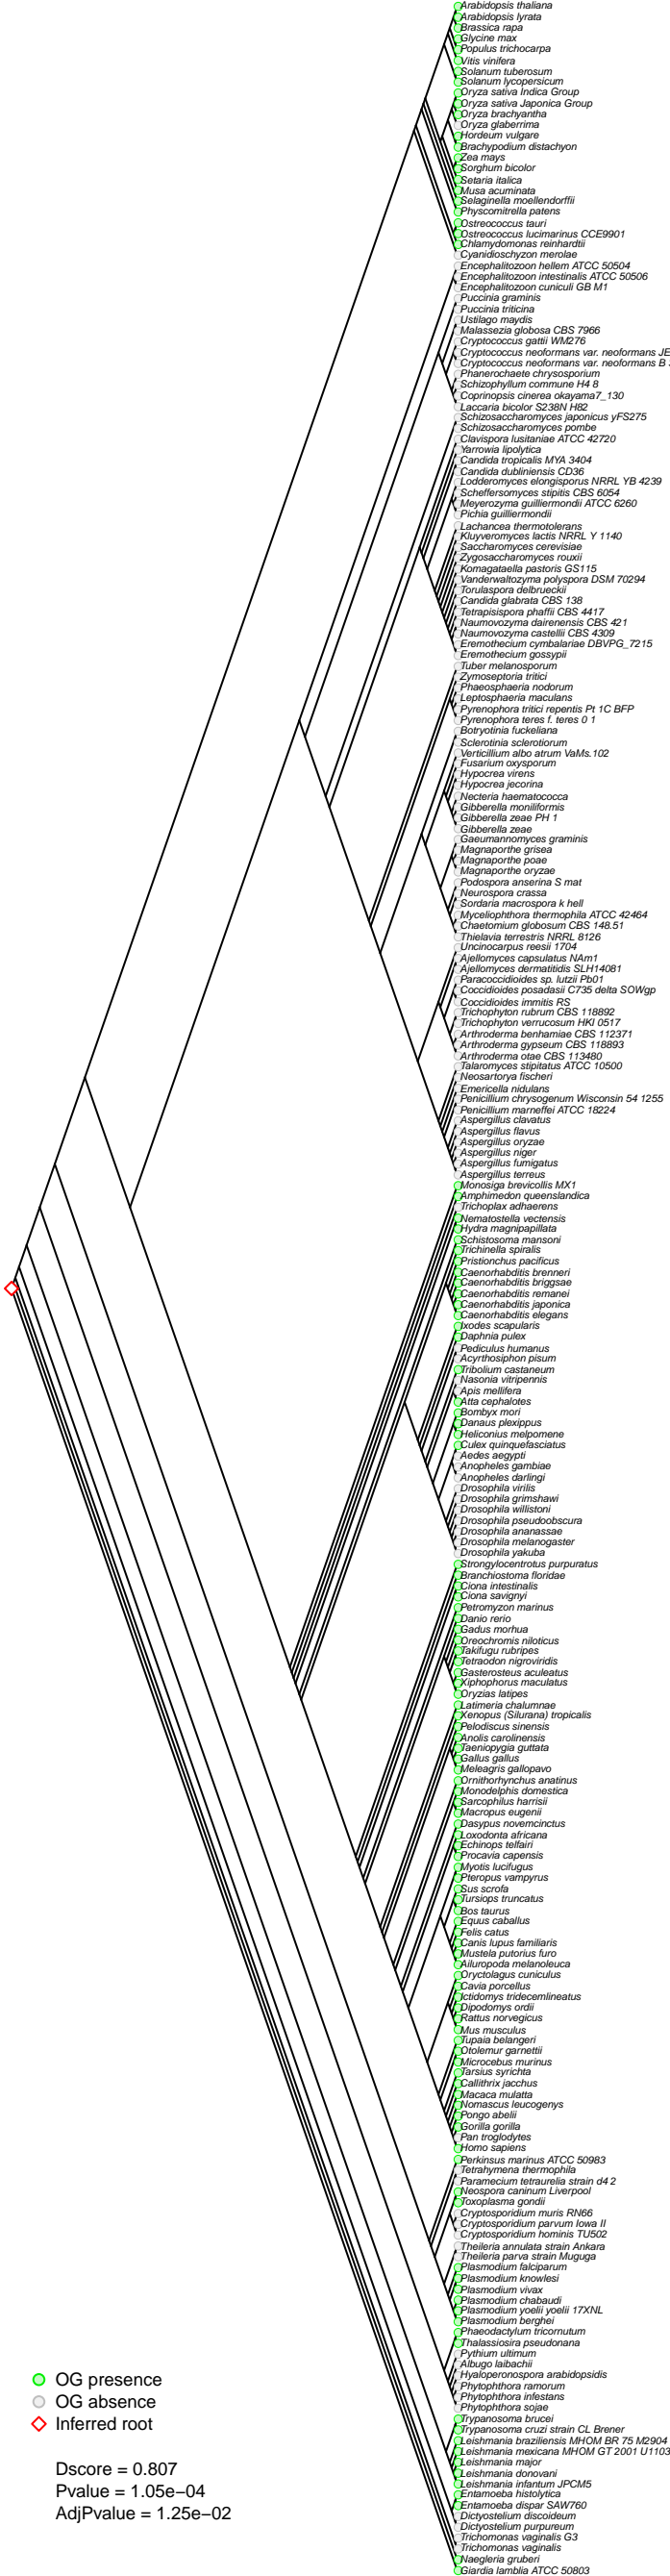

- OG presence
- OG absence
- ◆ Inferred root

Dscore = 0.807  
 Pvalue = 1.05e-04  
 AdjPvalue = 1.25e-02

*Arabidopsis thaliana*  
*Arabidopsis lyrata*  
*Brassica rapa*  
*Glycine max*  
*Populus trichocarpa*  
*Vitis vinifera*  
*Solanum tuberosum*  
*Solanum lycopersicum*  
*Oryza sativa Indica Group*  
*Oryza sativa Japonica Group*  
*Oryza brachyantha*  
*Oryza glaberrima*  
*Hordeum vulgare*  
*Brachypodium distachyon*  
*Zea mays*  
*Sorghum bicolor*  
*Setaria italica*  
*Musa acuminata*  
*Selaginella moellendorffii*  
*Physcomitrella patens*  
*Ostreococcus tauri*  
*Ostreococcus lucimarinus CCE9901*  
*Chlamydomonas reinhardtii*  
*Cyanidioschyzon merolae*  
*Encephalitozoon hellem ATCC 50504*  
*Encephalitozoon intestinalis ATCC 50506*  
*Encephalitozoon cuniculi GB M1*  
*Puccinia graminis*  
*Puccinia triticina*  
*Ustilago maydis*  
*Malassezia globosa CBS 7966*  
*Cryptococcus gattii WM276*  
*Cryptococcus neoformans var. neoformans JEC21*  
*Cryptococcus neoformans var. neoformans B 3501A*  
*Phanerochaete chrysosporium*  
*Schizophyllum commune H4 B*  
*Coprinopsis cinerea okayama7\_130*  
*Laccaria bicolor S238N H82*  
*Schizosaccharomyces japonicus yFS275*  
*Schizosaccharomyces pombe*  
*Clavospora lusitaniae ATCC 42720*  
*Yarrowia lipolytica*  
*Candida tropicalis MYA 3404*  
*Candida dubliniensis CD36*  
*Lodderomyces elongisporus NRRL YB 4239*  
*Scheffersomyces stipitis CBS 6054*  
*Meyerozyma guilliermondii ATCC 6260*  
*Pichia guilliermondii*  
*Lachancea thermotolerans*  
*Kluyveromyces fragilis NRRL Y 1140*  
*Saccharomyces cerevisiae*  
*Zygosaccharomyces rouxii*  
*Komagataella pastoris GS115*  
*Vanderwaltozyma polyspora DSM 70294*  
*Torulasporea delbrueckii*  
*Candida glabrata CBS 138*  
*Tetrapispora phaffii CBS 4417*  
*Naumovozyma dairensis CBS 421*  
*Naumovozyma castellii CBS 4309*  
*Eremothecium cymbalariae DBVPG\_7215*  
*Eremothecium gossypii*  
*Tuber melanosporum*  
*Zymoseptoria tritici*  
*Phaeosphaeria nodorum*  
*Leptosphaeria maculans*  
*Pyrenophora tritici repentis Pt 1C BFP*  
*Pyrenophora teres f. teres 0 1*  
*Botryotinia fuckeliana*  
*Sclerotinia sclerotiorum*  
*Verticillium albo atrum VaMs.102*  
*Fusarium oxysporum*  
*Hypocrea virens*  
*Hypocrea jecorina*  
*Nectria haematococca*  
*Gibberella moniliformis*  
*Gibberella zeae PH 1*  
*Gibberella zeae*  
*Gaeumannomyces graminis*  
*Magnaporthe grisea*  
*Magnaporthe poae*  
*Magnaporthe oryzae*  
*Podospora anserina S mat*  
*Neurospora crassa*  
*Sordaria macrospora k hell*  
*Myceliophthora thermophila ATCC 42464*  
*Chaetomium globosum CBS 148.51*  
*Thielavia terrestris NRRL 8126*  
*Uncinocarpus reesii 1704*  
*Ajellomyces capsulatus Nam1*  
*Ajellomyces dermatitidis SLH14081*  
*Paracoccidioides sp. lutzi Pb01*  
*Coccidioides posadasii C735 delta SOWgp*  
*Coccidioides immitis RS*  
*Trichophyton rubrum CBS 118892*  
*Trichophyton verrucosum HKI 0517*  
*Arthroderma benhamiae CBS 112371*  
*Arthroderma gypseum CBS 118893*  
*Arthroderma otae CBS 113480*  
*Talaromyces stipitatus ATCC 10500*  
*Neosartorya fischeri*  
*Emericella nidulans*  
*Penicillium chrysogenum Wisconsin 54 1255*  
*Penicillium marneffei ATCC 18224*  
*Aspergillus clavatus*  
*Aspergillus flavus*  
*Aspergillus oryzae*  
*Aspergillus niger*  
*Aspergillus fumigatus*  
*Aspergillus terreus*  
*Monosiga brevicollis MX1*  
*Amphimedon queenslandica*  
*Trichoplax adhaerens*  
*Nematostella vectensis*  
*Hydra magnipapillata*  
*Schistosoma mansoni*  
*Trichiella spiralis*  
*Pristionchus pacificus*  
*Caenorhabditis brenneri*  
*Caenorhabditis briggsae*  
*Caenorhabditis remanei*  
*Caenorhabditis japonica*  
*Caenorhabditis elegans*  
*Daphnia pulex*  
*Pediculus humanus*  
*Acyrtosiphon pisum*  
*Tribolium castaneum*  
*Nasonia vitripennis*  
*Apis mellifera*  
*Atta cephalotes*  
*Bombyx mori*  
*Danaus plexippus*  
*Heliconius melpomene*  
*Culex quinquefasciatus*  
*Aedes aegypti*  
*Anopheles gambiae*  
*Anopheles darlingi*  
*Drosophila virilis*  
*Drosophila grimshawi*  
*Drosophila willistoni*  
*Drosophila pseudoobscura*  
*Drosophila ananassae*  
*Drosophila melanogaster*  
*Drosophila yakuba*  
*Strongylocentrotus purpuratus*  
*Branchiostoma floridae*  
*Ciona intestinalis*  
*Ciona savignyi*  
*Petromyzon marinus*  
*Danio rerio*  
*Gadus morhua*  
*Oreochromis niloticus*  
*Takifugu rubripes*  
*Tetraodon nigroviridis*  
*Gasterosteus aculeatus*  
*Xiphophorus maculatus*  
*Oryzias latipes*  
*Latimeria chalumnae*  
*Xenopus (Silurana) tropicalis*  
*Pelodiscus sinensis*  
*Anolis carolinensis*  
*Taeniopygia guttata*  
*Gallus gallus*  
*Meleagris gallopavo*  
*Ornithorhynchus anatinus*  
*Monodelphis domestica*  
*Sarcophilus harrisii*  
*Macropus eugenii*  
*Dasyurus novemcinctus*  
*Loxodonta africana*  
*Echinops telfairii*  
*Procavia capensis*  
*Myotis lucifugus*  
*Pteropus vampyrus*  
*Sus scrofa*  
*Tursiops truncatus*  
*Bos taurus*  
*Equus caballus*  
*Felis catus*  
*Canis lupus familiaris*  
*Mustela putorius furo*  
*Alluopoda melanoleuca*  
*Cryptolestes cuniculatus*  
*Cavia porcellus*  
*Uctidomys tridecemlineatus*  
*Dipodomys ordii*  
*Rattus norvegicus*  
*Mus musculus*  
*Tupaia belangeri*  
*Otolomus garrettii*  
*Microcebus murinus*  
*Tarsius syrichta*  
*Callithrix jacchus*  
*Macaca mulatta*  
*Nomascus leucogenys*  
*Pongo abelii*  
*Gorilla gorilla*  
*Pan troglodytes*  
*Homo sapiens*  
*Perkinsus marinus ATCC 50983*  
*Tetrahymena thermophila*  
*Paramecium tetraurelia strain d4 2*  
*Neospora caninum Liverpool*  
*Toxoplasma gondii*  
*Cryptosporidium muris RN66*  
*Cryptosporidium parvum Iowa II*  
*Cryptosporidium hominis TU502*  
*Theileria annulata strain Ankara*  
*Theileria parva strain Muguga*  
*Plasmodium falciparum*  
*Plasmodium knowlesi*  
*Plasmodium vivax*  
*Plasmodium chabaudi*  
*Plasmodium yoelii yoelii 17XNL*  
*Plasmodium berghei*  
*Phaeodactylum tricorutum*  
*Thalassiosira pseudonana*  
*Pythium ultimum*  
*Albugo falabachii*  
*Hyaloperonospora arabidopsidis*  
*Phytophthora ramorum*  
*Phytophthora infestans*  
*Phytophthora sojae*  
*Trypanosoma brucei*  
*Trypanosoma cruzi strain CL Brener*  
*Leishmania braziliensis MHOM BR 75 M2904*  
*Leishmania mexicana MHOM GT 2001 U1103*  
*Leishmania major*  
*Leishmania donovani*  
*Leishmania infantum JPCM5*  
*Entamoeba histolytica*  
*Entamoeba dispar SAW760*  
*Dicystostellum discoideum*  
*Dicystostellum purpureum*  
*Trichomonas vaginalis G3*  
*Trichomonas vaginalis*  
*Naegleria gruberi*  
*Giardia lamblia ATCC 50803*

# NOG06748

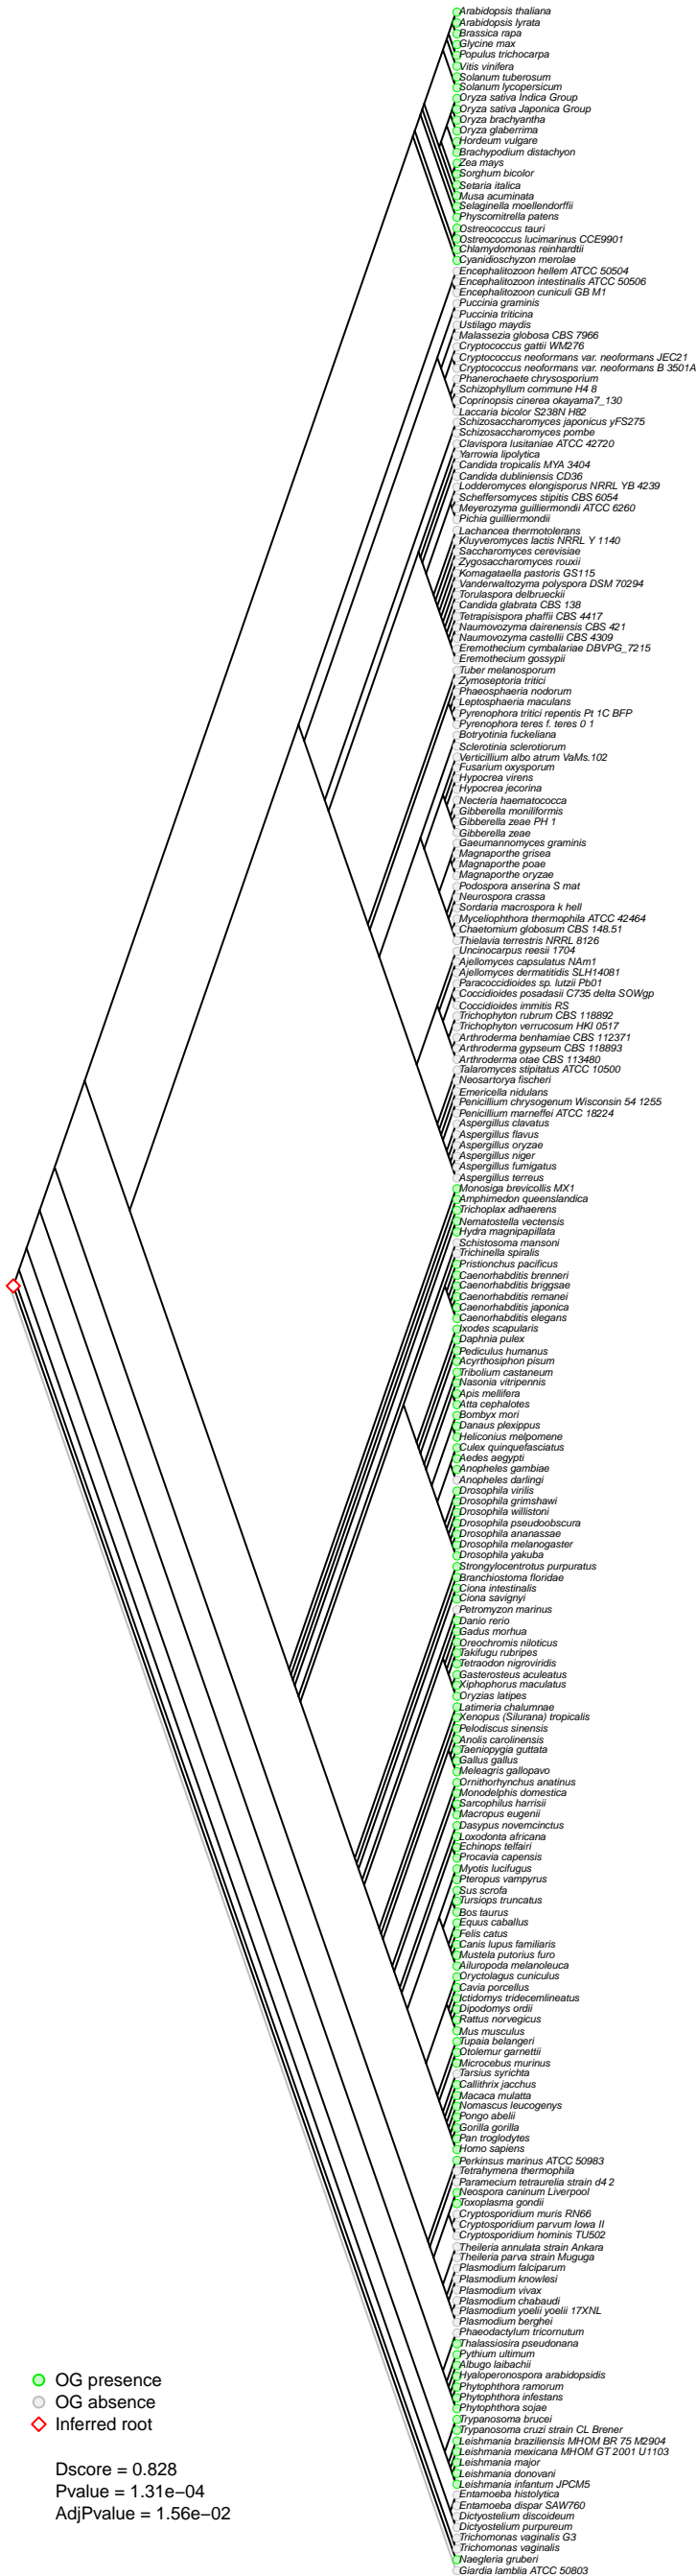

- Arabis thaliana
- Arabidopsis lyrata
- Brassica rapa
- Glycine max
- Populus trichocarpa
- Vitis vinifera
- Solanum tuberosum
- Solanum lycopersicum
- Oryza sativa Indica Group
- Oryza sativa Japonica Group
- Oryza brachyantha
- Oryza glaberrima
- Hordeum vulgare
- Brachypodium distachyon
- Zea mays
- Sorghum bicolor
- Setaria italica
- Musa acuminata
- Selaginella moellendorffii
- Physcomitrella patens
- Ostreococcus tauri
- Ostreococcus lucimarinus CCE9901
- Chlamydomonas reinhardtii
- Cyanidioschyzon merolae
- Encephalitozoon hellem ATCC 50504
- Encephalitozoon intestinalis ATCC 50506
- Encephalitozoon cuniculi GB M1
- Puccinia graminis
- Puccinia triticina
- Ustilago maydis
- Melassezia globosa CBS 7966
- Cryptococcus gattii WM276
- Cryptococcus neoformans var. neoformans JEC21
- Cryptococcus neoformans var. neoformans B 3501A
- Phanerochaete chrysosporium
- Schizophyllum commune H4 B
- Coprinopsis cinerea okayama7\_130
- Laccaria bicolor S238N H82
- Schizosaccharomyces japonicus yFS275
- Schizosaccharomyces pombe
- Clavospora lusitanae ATCC 42720
- Yarrowia lipolytica
- Candida tropicalis MYA 3404
- Candida dubliniensis CD36
- Lodderomyces elongisporus NRRL YB 4239
- Scheffersomyces stipitis CBS 6054
- Meyeromyces guilliermondii ATCC 6260
- Pichia guilliermondii
- Lachancea thermotolerans
- Kluyveromyces fragilis NRRL Y 1140
- Saccharomyces cerevisiae
- Zygosaccharomyces rouxii
- Komagataella pastoris GS115
- Vanderwaltozyma polyspora DSM 70294
- Torulopsis delbrueckii
- Candida glabrata CBS 138
- Tetrapispora phaffii CBS 4417
- Naumovozyma dairensis CBS 421
- Naumovozyma castellii CBS 4309
- Eremothecium cymbalariae DBVPG\_7215
- Eremothecium gossypii
- Tuber melanosporum
- Zymoseptoria tritici
- Phaeosphaeria nodorum
- Leptosphaeria maculans
- Pyrenophora tritici repens Pt 1C BFP
- Pyrenophora teres f. teres 0 1
- Botryotinia fuckeliana
- Sclerotinia sclerotiorum
- Verticillium albo atrum VaMs.102
- Fusarium oxysporum
- Hypocrea virens
- Hypocrea jecorina
- Nectria haematococca
- Gibberella moniliformis
- Gibberella zeae PH 1
- Gibberella zeae
- Gaeumannomyces graminis
- Magnaporthe grisea
- Magnaporthe poae
- Magnaporthe oryzae
- Podospira anserina S mat
- Neurospora crassa
- Sordaria macrospora k hell
- Myceliophthora thermophila ATCC 42464
- Chaetomium globosum CBS 148.51
- Thielavia terrestris NRRL 8126
- Uncinocarpus reesii 1704
- Ajellomyces capsulatus Nam1
- Ajellomyces dermatitidis SLH14081
- Paracoccidioides sp. lutzi Fb01
- Coccidioides posadasii C735 delta SOWgp
- Coccidioides immitis RS
- Trichophyton rubrum CBS 118892
- Trichophyton verrucosum HKI 0517
- Arthroderma benhamiae CBS 112371
- Arthroderma gypseum CBS 118893
- Arthroderma otae CBS 113480
- Talaromyces stipitatus ATCC 10500
- Neosartorya fischeri
- Emericella nidulans
- Penicillium chrysogenum Wisconsin 54 1255
- Penicillium marneffei ATCC 18224
- Aspergillus clavatus
- Aspergillus flavus
- Aspergillus oryzae
- Aspergillus niger
- Aspergillus fumigatus
- Aspergillus terreus
- Monosiga brevicollis MX1
- Amphimedon queenslandica
- Trichoplax adhaerens
- Nematostella vectensis
- Hydra magnipapillata
- Schistosoma mansoni
- Trichinella spiralis
- Pristionchus pacificus
- Caenorhabditis breneri
- Caenorhabditis briggsae
- Caenorhabditis remanei
- Caenorhabditis japonica
- Caenorhabditis elegans
- Ixodes scapularis
- Daphnia pulex
- Pediculus humanus
- Acyrtosiphon pisum
- Tribolium castaneum
- Nasonia vitripennis
- Apis mellifera
- Atta cephalotes
- Bombyx mori
- Danaus plexippus
- Heliconius melpomene
- Culex quinquefasciatus
- Aedes aegypti
- Anopheles gambiae
- Anopheles darlingi
- Drosophila virilis
- Drosophila grimshawi
- Drosophila willistoni
- Drosophila pseudoobscura
- Drosophila ananassae
- Drosophila melanogaster
- Drosophila yakuba
- Strongylocentrotus purpuratus
- Branchiostoma floridae
- Ciona intestinalis
- Ciona savignyi
- Petromyzon marinus
- Danio rerio
- Gadus morhua
- Oreochromis niloticus
- Takifugu rubripes
- Tetraodon nigroviridis
- Gasterosteus aculeatus
- Xiphophorus maculatus
- Oryzias latipes
- Latimeria chalumnae
- Xenopus (Silurana) tropicalis
- Pelodiscus sinensis
- Anolis carolinensis
- Taeniopygia guttata
- Gallus gallus
- Meleagris gallopavo
- Ornithorhynchus anatinus
- Monodelphis domestica
- Sarcophilus harrisii
- Macropus eugenii
- Dasyurus novemcinctus
- Loxodonta africana
- Echinops telitarii
- Procavia capensis
- Myotis lucifugus
- Pteropus vampyrus
- Sus scrofa
- Tursiops truncatus
- Bos taurus
- Equus caballus
- Felis catus
- Canis lupus familiaris
- Mustela putorius furo
- Alluropoda melanoleuca
- Cryptolestes cuniculus
- Cavia porcellus
- Ictidomys tridecemlineatus
- Dipodomys ordii
- Rattus norvegicus
- Mus musculus
- Tupaia belangeri
- Otolomus garretti
- Microcebus murinus
- Tarsius syrichta
- Callithrix jacchus
- Macaca mulatta
- Nomascus leucogenys
- Pongo abelii
- Gorilla gorilla
- Pan troglodytes
- Homo sapiens
- Perkinsus marinus ATCC 50983
- Tetrahymena thermophila
- Paramecium tetraurelia strain d4 2
- Neospora caninum Liverpool
- Toxoplasma gondii
- Cryptosporidium muris RN66
- Cryptosporidium parvum Iowa II
- Cryptosporidium hominis TU502
- Theileria annulata strain Ankara
- Theileria parva strain Muguga
- Plasmodium falciparum
- Plasmodium knowlesi
- Plasmodium vivax
- Plasmodium chabaudi
- Plasmodium yoelii yoelii 17XNL
- Plasmodium berghei
- Phaeodactylum tricornutum
- Thalassiosira pseudonana
- Pythium ultimum
- Albugo liliaceae
- Hyaloperonospora arabidopsidis
- Phytophthora ramorum
- Phytophthora infestans
- Phytophthora sojae
- Trypanosoma brucei
- Trypanosoma cruzi strain CL Brener
- Leishmania braziliensis MHOM BR 75 M2904
- Leishmania mexicana MHOM GT 2001 U1103
- Leishmania major
- Leishmania donovani
- Leishmania infantum JPCM5
- Entamoeba histolytica
- Entamoeba dispar SAW760
- Dicystostellum discoideum
- Dicystostellum purpureum
- Trichomonas vaginalis G3
- Trichomonas vaginalis
- Naegleria gruberi
- Giardia lamblia ATCC 50803

- OG presence
- OG absence
- Inferred root

Dscore = 1  
Pvalue = 5.48e-06  
AdjPvalue = 6.52e-04

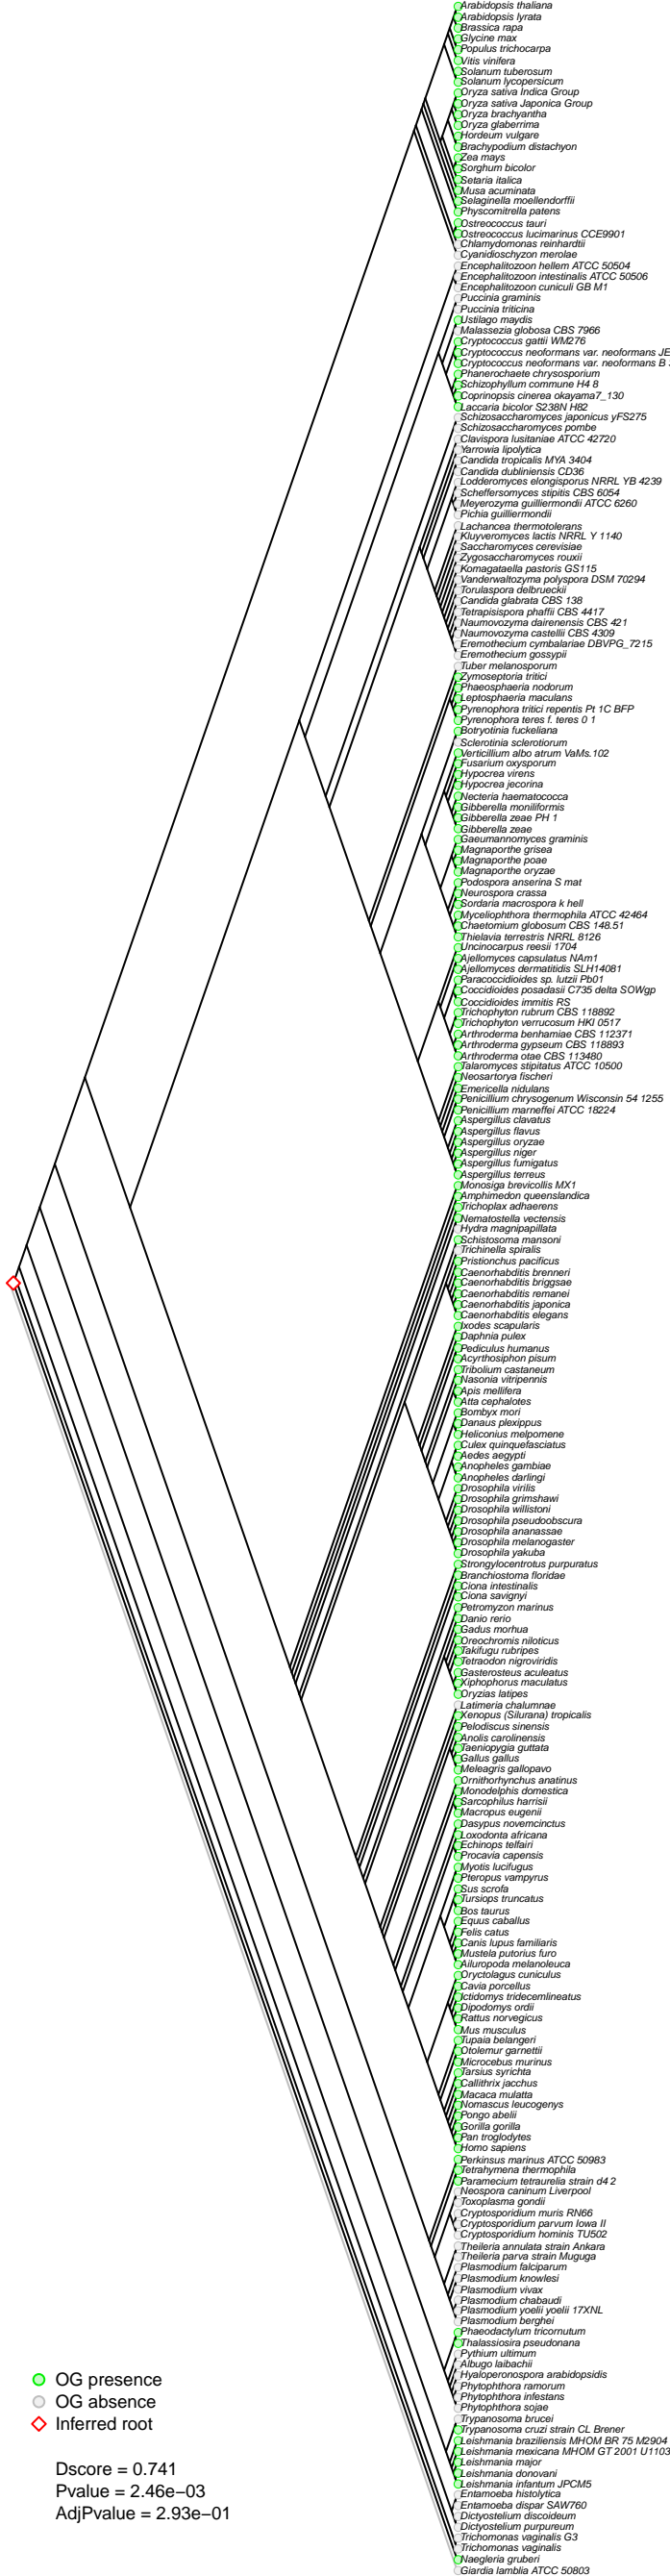

● OG presence  
● OG absence  
◆ Inferred root

Dscore = 0.741  
 Pvalue = 2.46e-03  
 AdjPvalue = 2.93e-01

- Arabidopsis thaliana
- Arabidopsis lyrata
- Brassica rapa
- Glycine max
- Populus trichocarpa
- Vitis vinifera
- Solanum tuberosum
- Solanum lycopersicum
- Oryza sativa Indica Group
- Oryza sativa Japonica Group
- Oryza brachyantha
- Oryza glaberrima
- Hordeum vulgare
- Brachypodium distachyon
- Zea mays
- Sorghum bicolor
- Setaria italica
- Musa acuminata
- Selaginella moellendorffii
- Physcomitrella patens
- Ostreococcus tauri
- Ostreococcus lucimarinus CCE9901
- Chlamydomonas reinhardtii
- Cyanidioschyzon merolae
- Encephalitozoon hellem ATCC 50504
- Encephalitozoon intestinalis ATCC 50506
- Encephalitozoon cuniculi GB M1
- Puccinia graminis
- Puccinia triticina
- Ustilago maydis
- Melassezia globosa CBS 7966
- Cryptococcus gattii WM276
- Cryptococcus neoformans var. neoformans JEC21
- Cryptococcus neoformans var. neoformans B 3501A
- Phanerochaete chrysosporium
- Schizophyllum commune H4 B
- Coprinopsis cinerea okayama7\_130
- Laccaria bicolor S238N H82
- Schizosaccharomyces japonicus yFS275
- Schizosaccharomyces pombe
- Clavospora lusitanae ATCC 42720
- Yarrowia lipolytica
- Candida tropicalis MYA 3404
- Candida dubliniensis CD36
- Lodderomyces elongisporus NRRL YB 4239
- Scheffersomyces stipitis CBS 6054
- Meyerozyma guilliermondii ATCC 6260
- Pichia guilliermondii
- Lachancea thermotolerans
- Kluyveromyces lactis NRRL Y 1140
- Saccharomyces cerevisiae
- Zygosaccharomyces rouxii
- Komagataella pastoris GS115
- Vanderwaltozyma polyspora DSM 70294
- Torulasporea delbrueckii
- Candida glabrata CBS 138
- Tetrapispora phaffii CBS 4417
- Naumovozyma dairensis CBS 421
- Naumovozyma castellii CBS 4309
- Eremothecium cymbalariae DBVPG\_7215
- Eremothecium gossypii
- Tuber melanosporum
- Zymoseptoria tritici
- Phaeosphaeria nodorum
- Leptosphaeria maculans
- Pyrenophora tritici repentis Pt 1C BFP
- Pyrenophora teres f. teres 0 1
- Botryotinia fuckeliana
- Sclerotinia sclerotiorum
- Verticillium albo atrum VaMs.102
- Fusarium oxysporum
- Hypocrea virens
- Hypocrea jecorina
- Nectria haematococca
- Gibberella moniliformis
- Gibberella zeae PH 1
- Gibberella zeae
- Gaeumannomyces graminis
- Magnaporthe grisea
- Magnaporthe poae
- Magnaporthe oryzae
- Podospira anserina S mat
- Neurospora crassa
- Sordaria macrospora k hell
- Myceliophthora thermophila ATCC 42464
- Chaetomium globosum CBS 148.51
- Thielavia terrestris NRRL 8126
- Uncinocarpus reesii 1704
- Ajellomyces capsulatus Nam1
- Ajellomyces dermatitidis SLH14081
- Paracoccidioides sp. lutzi Pb01
- Coccidioides posadasii C735 delta SOWgp
- Coccidioides immitis RS
- Trichophyton rubrum CBS 118892
- Trichophyton verrucosum HKI 0517
- Arthroderma benhamiae CBS 112371
- Arthroderma gypseum CBS 118893
- Arthroderma otae CBS 113480
- Talaromyces stipitatus ATCC 10500
- Neosartorya fischeri
- Emericella nidulans
- Penicillium chrysogenum Wisconsin 54 1255
- Penicillium marneffei ATCC 18224
- Aspergillus clavatus
- Aspergillus flavus
- Aspergillus oryzae
- Aspergillus niger
- Aspergillus fumigatus
- Aspergillus terreus
- Monosiga brevicollis MX1
- Amphimedon queenslandica
- Trichoplax adhaerens
- Nematostella vectensis
- Hydra magnipapillata
- Schistosoma mansoni
- Trichiella spiralis
- Pristionchus pacificus
- Caenorhabditis brenneri
- Caenorhabditis briggsae
- Caenorhabditis remanei
- Caenorhabditis japonica
- Caenorhabditis elegans
- Daphnia pulex
- Pediculus humanus
- Acyrtosiphon pisum
- Tribolium castaneum
- Nasonia vitripennis
- Apis mellifera
- Atta cephalotes
- Bombyx mori
- Danaus plexippus
- Heliconius melpomene
- Culex quinquefasciatus
- Aedes aegypti
- Anopheles gambiae
- Anopheles darlingi
- Drosophila virilis
- Drosophila grimshawi
- Drosophila willistoni
- Drosophila pseudoobscura
- Drosophila ananassae
- Drosophila melanogaster
- Drosophila yakuba
- Strongylocentrotus purpuratus
- Branchiostoma floridae
- Ciona intestinalis
- Ciona savignyi
- Petromyzon marinus
- Danio rerio
- Gadus morhua
- Oreochromis niloticus
- Takifugu rubripes
- Tetraodon nigroviridis
- Gasterosteus aculeatus
- Xiphophorus maculatus
- Oryzias latipes
- Latimeria chalumnae
- Xenopus (Silurana) tropicalis
- Pelodiscus sinensis
- Anolis carolinensis
- Taeniopygia guttata
- Gallus gallus
- Meleagris gallopavo
- Ornithorhynchus anatinus
- Monodelphis domestica
- Sarcophilus harrisii
- Macropus eugenii
- Dasyurus novemcinctus
- Loxodonta africana
- Echirips telfairi
- Procavia capensis
- Myotis lucifugus
- Pteropus vampyrus
- Sus scrofa
- Tursiops truncatus
- Bos taurus
- Equus caballus
- Felis catus
- Canis lupus familiaris
- Mustela putorius furo
- Alluopoda melanoleuca
- Cryptolestes cuniculus
- Cavia porcellus
- Uctidomys tridecemlineatus
- Dipodomys ordii
- Rattus norvegicus
- Mus musculus
- Tupaia belangeri
- Otolomus garrettii
- Microcebus murinus
- Tarsius syrichta
- Callithrix jacchus
- Macaca mulatta
- Nomascus leucogenys
- Pongo abelii
- Gorilla gorilla
- Pan troglodytes
- Homo sapiens
- Perkinsus marinus ATCC 50983
- Tetrahymena thermophila
- Paramecium tetraurelia strain d4 2
- Neospora caninum Liverpool
- Toxoplasma gondii
- Cryptosporidium muris RN66
- Cryptosporidium parvum Iowa II
- Cryptosporidium hominis TU502
- Theileria annulata strain Ankara
- Theileria parva strain Muguga
- Plasmodium falciparum
- Plasmodium knowlesi
- Plasmodium vivax
- Plasmodium chabaudi
- Plasmodium yoelii yoelii 17XNL
- Plasmodium berghei
- Phaeodactylum tricorutum
- Thalassiosira pseudonana
- Pythium ultimum
- Albugo falabachii
- Hyaloperonospora arabidopsidis
- Phytophthora ramorum
- Phytophthora infestans
- Phytophthora sojae
- Trypanosoma brucei
- Trypanosoma cruzi strain CL Brener
- Leishmania braziliensis MHOM BR 75 M2904
- Leishmania mexicana MHOM GT 2001 U1103
- Leishmania major
- Leishmania donovani
- Leishmania infantum JPCM5
- Entamoeba histolytica
- Entamoeba dispar SAW760
- Dicystostellum discoideum
- Dicystostellum purpureum
- Trichomonas vaginalis G3
- Trichomonas vaginalis
- Naegleria gruberi
- Giardia lamblia ATCC 50803

- Arabis thaliana
- Arabidopsis lyrata
- Brassica rapa
- Glycine max
- Populus trichocarpa
- Vitis vinifera
- Solanum tuberosum
- Solanum lycopersicum
- Oryza sativa Indica Group
- Oryza sativa Japonica Group
- Oryza brachyantha
- Oryza glaberrima
- Hordeum vulgare
- Brachypodium distachyon
- Zea mays
- Sorghum bicolor
- Setaria italica
- Musa acuminata
- Selaginella moellendorffii
- Physcomitrella patens
- Ostreococcus tauri
- Ostreococcus lucimarinus CCE9901
- Chlamydomonas reinhardtii
- Cyanidioschyzon merolae
- Encephalitozoon hellem ATCC 50504
- Encephalitozoon intestinalis ATCC 50506
- Encephalitozoon cuniculi GB M1
- Puccinia graminis
- Puccinia triticina
- Ustilago maydis
- Malassezia globosa CBS 7966
- Cryptococcus gattii WM276
- Cryptococcus neoformans var. neoformans JEC21
- Cryptococcus neoformans var. neoformans B 3501A
- Phanerochaete chrysosporium
- Schizophyllum commune H4 B
- Coprinopsis cinerea okayama7\_130
- Laccaria bicolor S238N H82
- Schizosaccharomyces japonicus yFS275
- Schizosaccharomyces pombe
- Clavospora lusitanae ATCC 42720
- Yarrowia lipolytica
- Candida tropicalis MYA 3404
- Candida dubliniensis CD36
- Lodderomyces elongisporus NRRL YB 4239
- Scheffersomyces stipitis CBS 6054
- Meyerozyma guilliermondii ATCC 6260
- Pichia guilliermondii
- Lachancea thermotolerans
- Kluyveromyces fragilis NRRL Y 1140
- Saccharomyces cerevisiae
- Zygosaccharomyces rouxii
- Komagataella pastoris GS115
- Vanderwaltozyma polyspora DSM 70294
- Torulopsis delbrueckii
- Candida glabrata CBS 138
- Tetrapispora phaffii CBS 4417
- Naumovozyma dairensis CBS 421
- Naumovozyma castellii CBS 4309
- Eremothecium cymbalariae DBVPG\_7215
- Eremothecium gossypii
- Tuber melanosporum
- Zymoseptoria tritici
- Phaeosphaeria nodorum
- Leptosphaeria maculans
- Pyrenophora tritici repens Pt 1C BFP
- Pyrenophora teres f. teres 0 1
- Botryotinia fuckeliana
- Sclerotinia sclerotiorum
- Verticillium albo atrum VaMs.102
- Fusarium oxysporum
- Hypocrea virens
- Hypocrea jecorina
- Nectria haematococca
- Gibberella moniliformis
- Gibberella zeae PH 1
- Gibberella zeae
- Gaeumannomyces graminis
- Magnaporthe grisea
- Magnaporthe poae
- Magnaporthe oryzae
- Podospira anserina S mat
- Neurospora crassa
- Sordaria macrospora k hell
- Myceliophthora thermophila ATCC 42464
- Chaetomium globosum CBS 148.51
- Thielavia terrestris NRRL 8126
- Uncinocarpus reesii 1704
- Ajellomyces capsulatus Nam1
- Ajellomyces dermatitidis SLH14081
- Paracoccidioides sp. lutzi Fb01
- Coccidioides posadasii C735 delta SOWgp
- Coccidioides immitis RS
- Trichophyton rubrum CBS 118892
- Trichophyton verrucosum HKI 0517
- Arthroderma benhamiae CBS 112371
- Arthroderma gypseum CBS 118893
- Arthroderma otae CBS 113480
- Talaromyces stipitatus ATCC 10500
- Neosartorya fischeri
- Emericella nidulans
- Penicillium chrysogenum Wisconsin 54 1255
- Penicillium marneffei ATCC 18224
- Aspergillus clavatus
- Aspergillus flavus
- Aspergillus oryzae
- Aspergillus niger
- Aspergillus fumigatus
- Aspergillus terreus
- Monosiga brevicollis MX1
- Amphimedon queenslandica
- Trichoplax adhaerens
- Nematostella vectensis
- Hydra magnipapillata
- Schistosoma mansoni
- Trichinella spiralis
- Pristionchus pacificus
- Caenorhabditis breneri
- Caenorhabditis briggsae
- Caenorhabditis remanei
- Caenorhabditis japonica
- Caenorhabditis elegans
- Ixodes scapularis
- Daphnia pulex
- Pediculus humanus
- Acyrtosiphon pisum
- Tribolium castaneum
- Nasonia vitripennis
- Apis mellifera
- Atta cephalotes
- Bombyx mori
- Danaus plexippus
- Heliconius melpomene
- Culex quinquefasciatus
- Aedes aegypti
- Anopheles gambiae
- Anopheles darlingi
- Drosophila virilis
- Drosophila grimshawi
- Drosophila willistoni
- Drosophila pseudoobscura
- Drosophila ananassae
- Drosophila melanogaster
- Drosophila yakuba
- Strongylocentrotus purpuratus
- Branchiostoma floridae
- Ciona intestinalis
- Ciona savignyi
- Petromyzon marinus
- Danio rerio
- Gadus morhua
- Oreochromis niloticus
- Takifugu rubripes
- Tetraodon nigroviridis
- Gasterosteus aculeatus
- Xiphophorus maculatus
- Oryzias latipes
- Latimeria chalumnae
- Xenopus (Silurana) tropicalis
- Pelodiscus sinensis
- Anolis carolinensis
- Taeniopygia guttata
- Gallus gallus
- Meleagris gallopavo
- Ornithorhynchus anatinus
- Monodelphis domestica
- Sarcophilus harrisii
- Macropus eugenii
- Dasyurus novemcinctus
- Loxodonta africana
- Echinops telitarii
- Procavia capensis
- Myotis lucifugus
- Pteropus vampyrus
- Sus scrofa
- Tursiops truncatus
- Bos taurus
- Equus caballus
- Felis catus
- Canis lupus familiaris
- Mustela putorius furo
- Alluropoda melanoleuca
- Cryptolestes cuniculus
- Cavia porcellus
- Ictidomys tridecemlineatus
- Dipodomys ordii
- Rattus norvegicus
- Mus musculus
- Tupaia belangeri
- Otolomus garrettii
- Microcebus murinus
- Tarsius syrichta
- Callithrix jacchus
- Macaca mulatta
- Nomascus leucogenys
- Pongo abelii
- Gorilla gorilla
- Pan troglodytes
- Homo sapiens
- Perkinsus marinus ATCC 50983
- Tetrahymena thermophila
- Paramecium tetraurelia strain d4 2
- Neospora caninum Liverpool
- Toxoplasma gondii
- Cryptosporidium muris RN66
- Cryptosporidium parvum Iowa II
- Cryptosporidium hominis TU502
- Theileria annulata strain Ankara
- Theileria parva strain Muguga
- Plasmodium falciparum
- Plasmodium knowlesi
- Plasmodium vivax
- Plasmodium chabaudi
- Plasmodium yoelii yoelii 17XNL
- Plasmodium berghei
- Phaeodactylum tricornutum
- Thalassiosira pseudonana
- Pythium ultimum
- Albugo liliaceae
- Hyaloperonospora arabidopsidis
- Phytophthora ramorum
- Phytophthora infestans
- Phytophthora sojae
- Trypanosoma brucei
- Trypanosoma cruzi strain CL Brener
- Leishmania braziliensis MHOM BR 75 M2904
- Leishmania mexicana MHOM GT 2001 U1103
- Leishmania major
- Leishmania donovani
- Leishmania infantum JPCM5
- Entamoeba histolytica
- Entamoeba dispar SAW760
- Dicystostellum discoideum
- Dicystostellum purpureum
- Trichomonas vaginalis G3
- Trichomonas vaginalis
- Naegleria gruberi
- Giardia lamblia ATCC 50803

- OG presence
- OG absence
- Inferred root

Dscore = 0.889  
Pvalue = 1.03e-04  
AdjPvalue = 1.22e-02



- Arabidopsis thaliana
- Arabidopsis lyrata
- Brassica rapa
- Glycine max
- Populus trichocarpa
- Vitis vinifera
- Solanum tuberosum
- Solanum lycopersicum
- Oryza sativa Indica Group
- Oryza sativa Japonica Group
- Oryza brachyantha
- Oryza glaberrima
- Hordeum vulgare
- Brachypodium distachyon
- Zea mays
- Sorghum bicolor
- Setaria italica
- Musa acuminata
- Selaginella moellendorffii
- Physcomitrella patens
- Streptococcus tauri
- Streptococcus lucimarinus CCE9901
- Chlamydomonas reinhardtii
- Cyanidioschyzon merolae
- Encephalitozoon hellem ATCC 50504
- Encephalitozoon intestinalis ATCC 50506
- Encephalitozoon cuniculi GB M1
- Puccinia graminis
- Puccinia triticina
- Ustilago maydis
- Malassezia globosa CBS 7966
- Cryptococcus gattii WM276
- Cryptococcus neoformans var. neoformans JEC21
- Cryptococcus neoformans var. neoformans B 3501A
- Phanerochaete chrysosporium
- Schizophyllum commune H4 B
- Coprinopsis cinerea okayama7\_130
- Laccaria bicolor S238N H82
- Schizosaccharomyces japonicus yFS275
- Schizosaccharomyces pombe
- Clavospora lusitanae ATCC 42720
- Yarrowia lipolytica
- Candida tropicalis MYA 3404
- Candida dubliniensis CD36
- Lodderomyces elongisporus NRRL YB 4239
- Scheffersomyces stipitis CBS 6054
- Meyeromyces guilliermondii ATCC 6260
- Pichia guilliermondii
- Lachancea thermotolerans
- Kluyveromyces fragilis NRRL Y 1140
- Saccharomyces cerevisiae
- Zygosaccharomyces rouxii
- Komagataella pastoris GS115
- Vanderwaltozyma polyspora DSM 70294
- Torulopsis delbrueckii
- Candida glabrata CBS 138
- Tetrapispora phaffii CBS 4417
- Naumovozyma dairensis CBS 421
- Naumovozyma castellii CBS 4309
- Eremothecium cymbalariae DBVPG\_7215
- Eremothecium gossypii
- Tuber melanosporum
- Zymoseptoria tritici
- Phaeosphaeria nodorum
- Leptosphaeria maculans
- Pyrenophora tritici repens Pt 1C BFP
- Pyrenophora teres f. teres 0 1
- Botryotinia fuckeliana
- Sclerotinia sclerotiorum
- Verticillium albo atrum VaMs.102
- Fusarium oxysporum
- Hypocrea virens
- Hypocrea jecorina
- Nectria haematococca
- Gibberella moniliformis
- Gibberella zeae PH 1
- Gibberella zeae
- Gaeumannomyces graminis
- Magnaporthe grisea
- Magnaporthe poae
- Magnaporthe oryzae
- Podospora anserina S mat
- Neurospora crassa
- Sordaria macrospora k hell
- Myceliophthora thermophila ATCC 42464
- Chaetomium globosum CBS 148.51
- Thielavia terrestris NRRL 8126
- Uncinocarpus reesii 1704
- Ajellomyces capsulatus Nam1
- Ajellomyces dermatitidis SLH14081
- Paracoccidioides sp. lutzi Pb01
- Coccidioides posadasii C735 delta SOWgp
- Coccidioides immitis RS
- Trichophyton rubrum CBS 118892
- Trichophyton verrucosum HKI 0517
- Arthroderma benhamiae CBS 112371
- Arthroderma gypseum CBS 118893
- Arthroderma otae CBS 113480
- Talaromyces stipitatus ATCC 10500
- Neosartorya fischeri
- Emericella nidulans
- Penicillium chrysogenum Wisconsin 54 1255
- Penicillium marneffei ATCC 18224
- Aspergillus clavatus
- Aspergillus flavus
- Aspergillus oryzae
- Aspergillus niger
- Aspergillus fumigatus
- Aspergillus terreus
- Monosiga brevicollis MX1
- Amphimedon queenslandica
- Trichoplax adhaerens
- Nematostella vectensis
- Hydra magnipapillata
- Schistosoma mansoni
- Trichiella spiralis
- Pristionchus pacificus
- Caenorhabditis brenneri
- Caenorhabditis briggsae
- Caenorhabditis remanei
- Caenorhabditis japonica
- Caenorhabditis elegans
- Drosophila melanogaster
- Drosophila yakuba
- Strongylocentrotus purpuratus
- Branchiostoma floridae
- Ciona intestinalis
- Ciona savignyi
- Petromyzon marinus
- Danio rerio
- Gadus morhua
- Oreochromis niloticus
- Takifugu rubripes
- Tetraodon nigroviridis
- Gasterosteus aculeatus
- Xiphophorus maculatus
- Dryzias latipes
- Latimeria chalumnae
- Xenopus (Silurana) tropicalis
- Pelodiscus sinensis
- Anolis carolinensis
- Taeniopygia guttata
- Gallus gallus
- Meleagris gallopavo
- Ornithorhynchus anatinus
- Monodelphis domestica
- Sarcophilus harrisii
- Macropus eugenii
- Dasyurus novemcinctus
- Loxodonta africana
- Echinops telillari
- Procavia capensis
- Myotis lucifugus
- Pteropus vampyrus
- Sus scrofa
- Turdus truncatus
- Bos taurus
- Equus caballus
- Felis catus
- Canis lupus familiaris
- Mustela putorius furo
- Alluopoda melanoleuca
- Cryptolegus cuniculus
- Cavia porcellus
- Ictidomys tridecemlineatus
- Dipodomys ordii
- Rattus norvegicus
- Mus musculus
- Tupaia belangeri
- Otolomus garrettii
- Microcebus murinus
- Tarsius syrichta
- Callithrix jacchus
- Macaca mulatta
- Nomascus leucogenys
- Pongo abelii
- Gorilla gorilla
- Pan troglodytes
- Homo sapiens
- Perkinsus marinus ATCC 50983
- Tetrahymena thermophila
- Paramecium tetraurelia strain d4 2
- Neospora caninum Liverpool
- Toxoplasma gondii
- Cryptosporidium muris RN66
- Cryptosporidium parvum Iowa II
- Cryptosporidium hominis TU502
- Theileria annulata strain Ankara
- Theileria parva strain Muguga
- Plasmodium falciparum
- Plasmodium knowlesi
- Plasmodium vivax
- Plasmodium chabaudi
- Plasmodium yoelii yoelii 17XNL
- Plasmodium berghei
- Phaeodactylum tricorutum
- Thalassiosira pseudonana
- Pythium ultimum
- Albugo falabacii
- Hyaloperonospora arabidopsidis
- Phytophthora ramorum
- Phytophthora infestans
- Phytophthora sojae
- Trypanosoma brucei
- Trypanosoma cruzi strain CL Brener
- Leishmania braziliensis MHOM BR 75 M2904
- Leishmania mexicana MHOM GT 2001 U1103
- Leishmania major
- Leishmania donovani
- Leishmania infantum JPCM5
- Entamoeba histolytica
- Entamoeba dispar SAW760
- Dictyostellium discoideum
- Dictyostellium purpureum
- Trichomonas vaginalis G3
- Trichomonas vaginalis
- Naegleria gruberi
- Giardia lamblia ATCC 50803

- OG presence
- OG absence
- ◊ Inferred root

Dscore = 0.839

Pvalue = 2.16e-04

AdjPvalue = 2.57e-02

# NOG11768

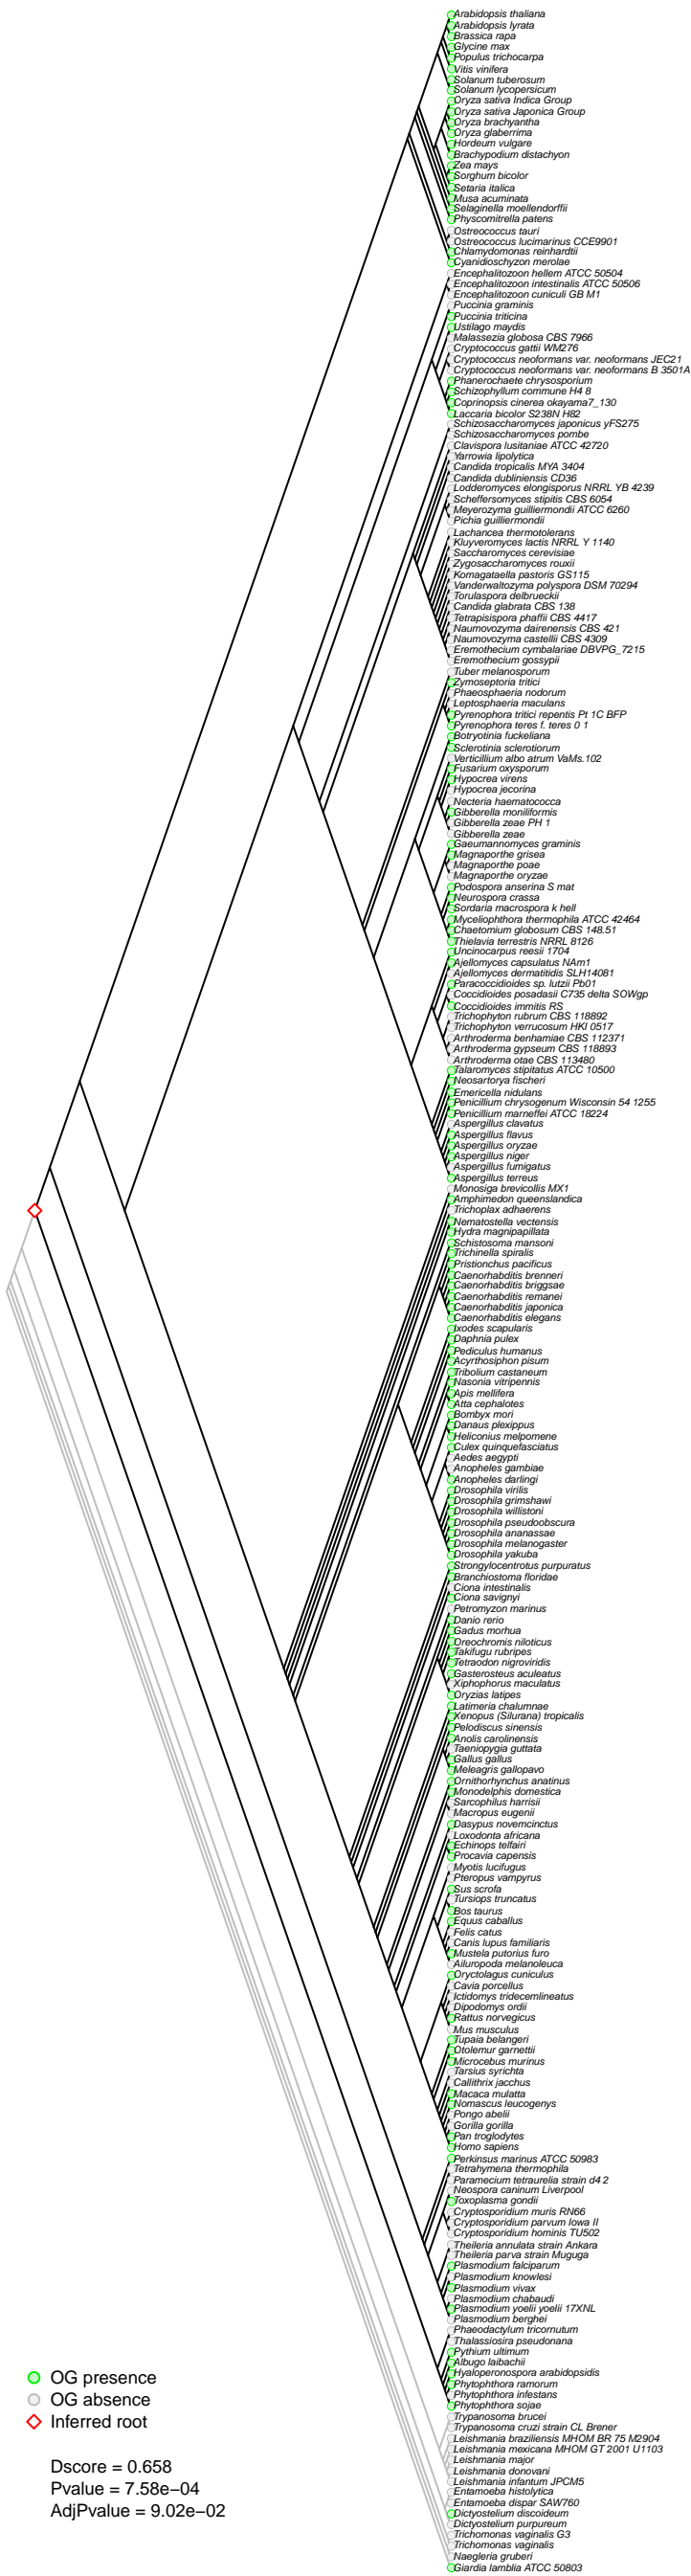

Dscore = 0.658

Pvalue = 7.58e-04

AdjPvalue = 9.02e-02

- Arabis thaliana
- Arabidopsis lyrata
- Brassica rapa
- Glycine max
- Populus trichocarpa
- Vitis vinifera
- Solanum tuberosum
- Solanum lycopersicum
- Oryza sativa Indica Group
- Oryza sativa Japonica Group
- Oryza brachyantha
- Oryza glaberrima
- Hordeum vulgare
- Brachypodium distachyon
- Zea mays
- Sorghum bicolor
- Setaria italica
- Musa acuminata
- Selaginella moellendorffii
- Physcomitrella patens
- Ostreococcus tauri
- Ostreococcus lucimarinus CCE9901
- Chlamydomonas reinhardtii
- Cyanidioschyzon merolae
- Encephalitozoon hellem ATCC 50504
- Encephalitozoon intestinalis ATCC 50506
- Encephalitozoon cuniculi GB M1
- Puccinia graminis
- Puccinia triticina
- Ustilago maydis
- Melassezia globosa CBS 7966
- Cryptococcus gattii WM276
- Cryptococcus neoformans var. neoformans JEC21
- Cryptococcus neoformans var. neoformans B 3501A
- Phanerochaete chrysosporium
- Schizophyllum commune H4 B
- Coprinopsis cinerea okayama7\_130
- Laccaria bicolor S238N H82
- Schizosaccharomyces japonicus yFS275
- Schizosaccharomyces pombe
- Clavospora lusitanae ATCC 42720
- Yarrowia lipolytica
- Candida tropicalis MYA 3404
- Candida dubliniensis CD36
- Lodderomyces elongisporus NRRL YB 4239
- Scheffersomyces stipitis CBS 6054
- Meyerozyma guilliermondii ATCC 6260
- Pichia guilliermondii
- Lachancea thermotolerans
- Kluyveromyces fragilis NRRL Y 1140
- Saccharomyces cerevisiae
- Zygosaccharomyces rouxii
- Komagataella pastoris GS115
- Vanderwaltozyma polyspora DSM 70294
- Torulopsis delbrueckii
- Candida glabrata CBS 138
- Tetrapisispora phaffii CBS 4417
- Naumovozyma dairenensis CBS 421
- Naumovozyma castellii CBS 4309
- Eremothecium cymbalariae DBVPG\_7215
- Eremothecium gossypii
- Tuber melanosporum
- Zymoseptoria tritici
- Phaeosphaeria nodorum
- Leptosphaeria maculans
- Pyrenophora tritici repens Pt 1C BFP
- Pyrenophora teres f. teres 0 1
- Botryotinia fuckeliana
- Sclerotinia sclerotiorum
- Verticillium albo atrum VaMs.102
- Fusarium oxysporum
- Hypocrea virens
- Hypocrea jecorina
- Nectria haematococca
- Gibberella moniliformis
- Gibberella zeae PH 1
- Gibberella zeae
- Gaeumannomyces graminis
- Magnaporthe grisea
- Magnaporthe poae
- Magnaporthe oryzae
- Podospira anserina S mat
- Neurospora crassa
- Sordaria macrospora k hell
- Myceliophthora thermophila ATCC 42464
- Chaetomium globosum CBS 148.51
- Thielavia terrestris NRRL 8126
- Uncinocarpus reesii 1704
- Ajellomyces capsulatus Nam1
- Ajellomyces dermatitidis SLH14081
- Paracoccidioides sp. lutzi Fb01
- Coccidioides posadasii C735 delta SOWgp
- Coccidioides immitis RS
- Trichophyton rubrum CBS 118892
- Trichophyton verrucosum HKI 0517
- Arthroderma benhamiae CBS 112371
- Arthroderma gypseum CBS 118893
- Arthroderma otae CBS 113480
- Talaromyces stipitatus ATCC 10500
- Neosartorya fischeri
- Emericella nidulans
- Penicillium chrysogenum Wisconsin 54 1255
- Penicillium marneffei ATCC 18224
- Aspergillus clavatus
- Aspergillus flavus
- Aspergillus oryzae
- Aspergillus niger
- Aspergillus fumigatus
- Aspergillus terreus
- Monosiga brevicollis MX1
- Amphimedon queenslandica
- Trichoplax adhaerens
- Nematostella vectensis
- Hydra magnipapillata
- Schistosoma mansoni
- Trichinella spiralis
- Pristionchus pacificus
- Caenorhabditis brenneri
- Caenorhabditis briggsae
- Caenorhabditis remanei
- Caenorhabditis japonica
- Caenorhabditis elegans
- Ixodes scapularis
- Daphnia pulex
- Pediculus humanus
- Acyrtosiphon pisum
- Tribolium castaneum
- Nasonia vitripennis
- Apis mellifera
- Atta cephalotes
- Bombyx mori
- Danaus plexippus
- Heliconius melpomene
- Culex quinquefasciatus
- Aedes aegypti
- Anopheles gambiae
- Anopheles darlingi
- Drosophila virilis
- Drosophila grimshawi
- Drosophila willistoni
- Drosophila pseudoobscura
- Drosophila ananassae
- Drosophila melanogaster
- Drosophila yakuba
- Strongylocentrotus purpuratus
- Branchiostoma floridae
- Ciona intestinalis
- Ciona savignyi
- Petromyzon marinus
- Danio rerio
- Gadus morhua
- Oreochromis niloticus
- Takifugu rubripes
- Tetraodon nigroviridis
- Gasterosteus aculeatus
- Xiphophorus maculatus
- Oryzias latipes
- Latimeria chalumnae
- Xenopus (Silurana) tropicalis
- Pelodiscus sinensis
- Anolis carolinensis
- Taeniopygia guttata
- Gallus gallus
- Meleagris gallopavo
- Ornithorhynchus anatinus
- Monodelphis domestica
- Sarcophilus harrisii
- Macropus eugenii
- Dasyurus novemcinctus
- Loxodonta africana
- Echinops telillari
- Procavia capensis
- Myotis lucifugus
- Pteropus vampyrus
- Sus scrofa
- Tursiops truncatus
- Bos taurus
- Equus caballus
- Felis catus
- Canis lupus familiaris
- Mustela putorius furo
- Alluropoda melanoleuca
- Cryptolestes cuniculus
- Cavia porcellus
- Ictidomys tridecemlineatus
- Dipodomys ordii
- Rattus norvegicus
- Mus musculus
- Tupaia belangeri
- Otolemur garrettii
- Microcebus murinus
- Tarsius syrichta
- Callithrix jacchus
- Macaca mulatta
- Nomascus leucogenys
- Pongo abelii
- Gorilla gorilla
- Pan troglodytes
- Homo sapiens
- Perkinsus marinus ATCC 50983
- Tetrahymena thermophila
- Paramecium tetraurelia strain d4 2
- Neospora caninum Liverpool
- Toxoplasma gondii
- Cryptosporidium muris RN66
- Cryptosporidium parvum Iowa II
- Cryptosporidium hominis TU502
- Theileria annulata strain Ankara
- Theileria parva strain Muguga
- Plasmodium falciparum
- Plasmodium knowlesi
- Plasmodium vivax
- Plasmodium chabaudi
- Plasmodium yoelii yoelii 17XNL
- Plasmodium berghei
- Phaeodactylum tricornutum
- Thalassiosira pseudonana
- Pythium ultimum
- Albugo liliaceae
- Hyaloperonospora arabidopsidis
- Phytophthora ramorum
- Phytophthora infestans
- Phytophthora sojae
- Trypanosoma brucei
- Trypanosoma cruzi strain CL Brener
- Leishmania braziliensis MHOM BR 75 M2904
- Leishmania mexicana MHOM GT 2001 U1103
- Leishmania major
- Leishmania donovani
- Leishmania infantum JPCM5
- Entamoeba histolytica
- Entamoeba dispar SAW760
- Dicystostellum discoideum
- Dicystostellum purpureum
- Trichomonas vaginalis G3
- Trichomonas vaginalis
- Naegleria gruberi
- Giardia lamblia ATCC 50803

- OG presence
- OG absence
- Inferred root

Dscore = 0.944  
Pvalue = 1.56e-05  
AdjPvalue = 1.86e-03

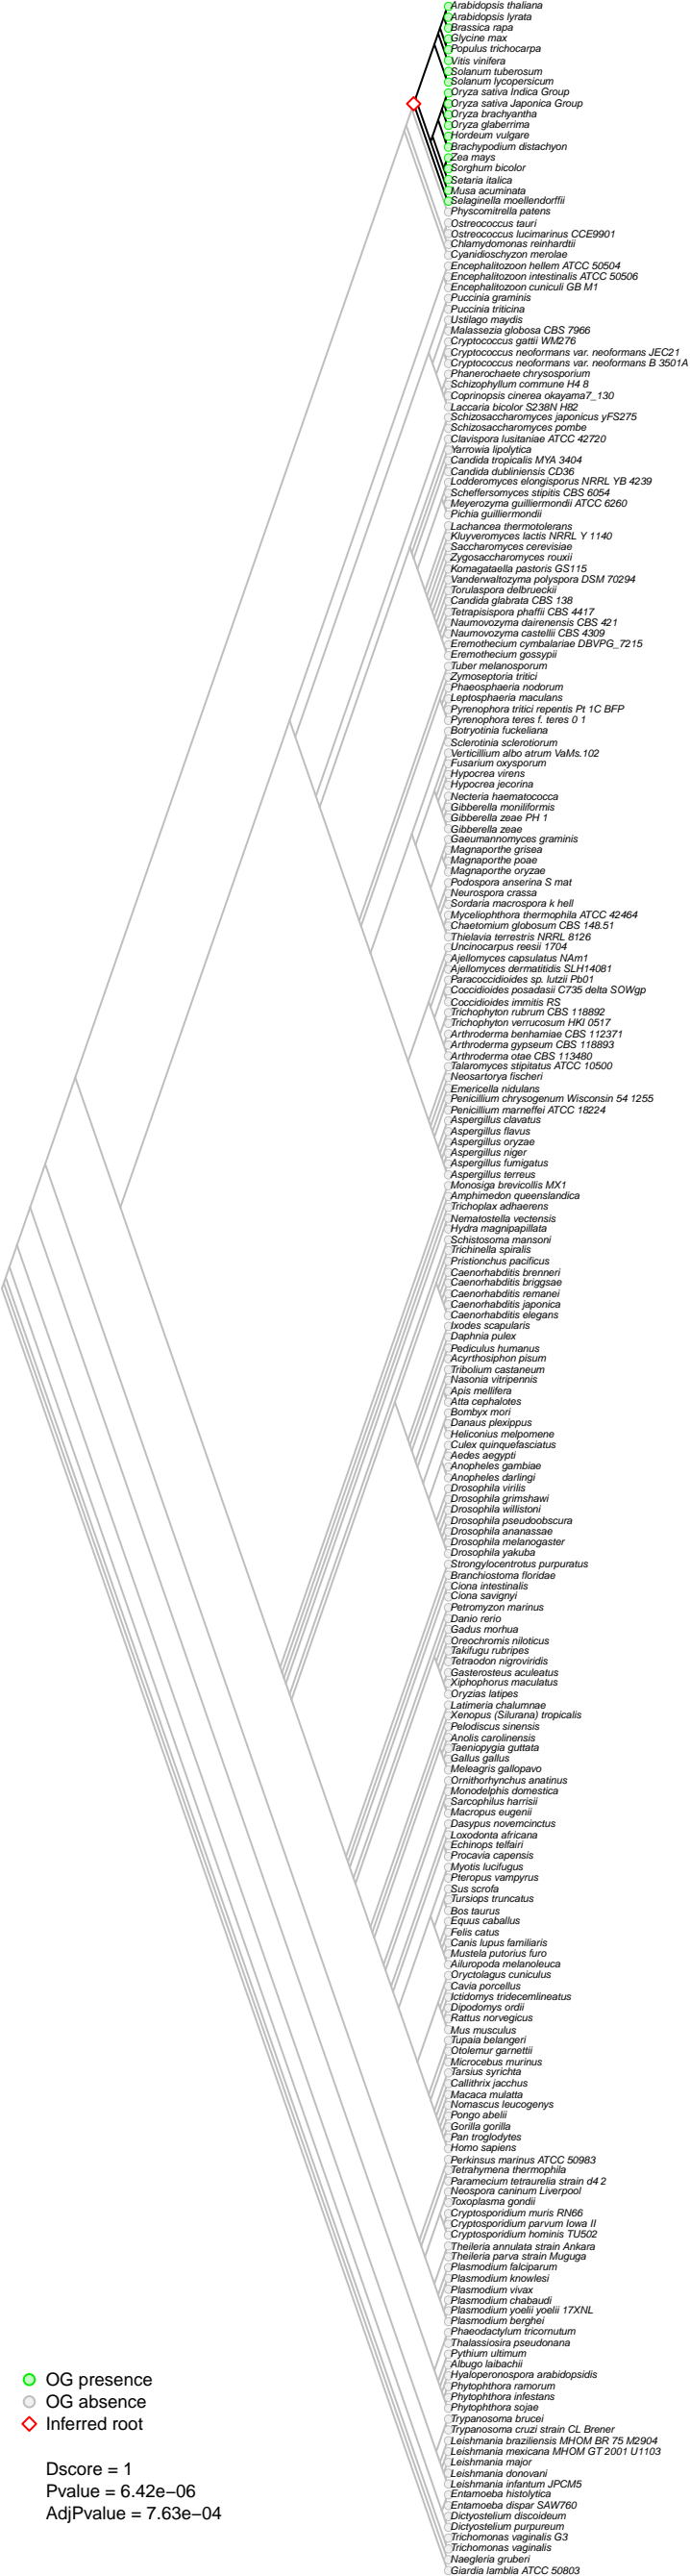

● OG presence  
● OG absence  
◆ Inferred root

Dscore = 1  
 Pvalue = 6.42e-06  
 AdjPvalue = 7.63e-04

- Arabis thaliana
- Arabis lyrata
- Brassica rapa
- Glycine max
- Populus trichocarpa
- Vitis vinifera
- Solanum tuberosum
- Solanum lycopersicum
- Oryza sativa Indica Group
- Oryza sativa Japonica Group
- Oryza brachyantha
- Oryza glaberrima
- Hordeum vulgare
- Brachypodium distachyon
- Zea mays
- Sorghum bicolor
- Setaria italica
- Musa acuminata
- Selaginella moellendorffii
- Physcomitrella patens
- Ostreococcus tauri
- Ostreococcus lucimarinus CCE9901
- Chlamydomonas reinhardtii
- Cyanidioschyzon merolae
- Encephalitozoon hellem ATCC 50504
- Encephalitozoon intestinalis ATCC 50506
- Encephalitozoon cuniculi GB M1
- Puccinia graminis
- Puccinia triticina
- Ustilago maydis
- Melassezia globosa CBS 7966
- Cryptococcus gattii WM276
- Cryptococcus neoformans var. neoformans JEC21
- Cryptococcus neoformans var. neoformans B 3501A
- Phanerochaete chrysosporium
- Schizophyllum commune H4 B
- Coprinopsis cinerea okayama7\_130
- Laccaria bicolor S238N H82
- Schizosaccharomyces japonicus yFS275
- Schizosaccharomyces pombe
- Clavospora lusitanae ATCC 42720
- Yarrowia lipolytica
- Candida tropicalis MYA 3404
- Candida dubliniensis CD36
- Lodderomyces elongisporus NRRL YB 4239
- Scheffersomyces stipitis CBS 6054
- Meyeromyces guilliermondii ATCC 6260
- Pichia guilliermondii
- Lachancea thermotolerans
- Kluyveromyces fragilis NRRL Y 1140
- Saccharomyces cerevisiae
- Zygosaccharomyces rouxii
- Komagataella pastoris GS115
- Vanderwaltozyma polyspora DSM 70294
- Torulopsis delbrueckii
- Candida glabrata CBS 138
- Tetrapispora phaffii CBS 4417
- Naumovozyma dairensis CBS 421
- Naumovozyma castellii CBS 4309
- Eremothecium cymbalariae DBVPG\_7215
- Eremothecium gossypii
- Tuber melanosporum
- Zymoseptoria tritici
- Phaeosphaeria nodorum
- Leptosphaeria maculans
- Pyrenophora tritici repens Pt 1C BFP
- Pyrenophora teres f. teres 0 1
- Botryotinia fuckeliana
- Sclerotinia sclerotiorum
- Verticillium albo atrum VaMs.102
- Fusarium oxysporum
- Hypocrea virens
- Hypocrea jecorina
- Nectria haematococca
- Gibberella moniliformis
- Gibberella zeae PH 1
- Gibberella zeae
- Gaeumannomyces graminis
- Magnaporthe grisea
- Magnaporthe poae
- Magnaporthe oryzae
- Podospira anserina S mat
- Neurospora crassa
- Sordaria macrospora k hell
- Myceliophthora thermophila ATCC 42464
- Chaetomium globosum CBS 148.51
- Thielavia terrestris NRRL 8126
- Uncinocarpus reesii 1704
- Ajellomyces capsulatus Nam1
- Ajellomyces dermatitidis SLH14081
- Paracoccidioides sp. lutzi Fb01
- Coccidioides posadasii C735 delta SOWgp
- Coccidioides immitis RS
- Trichophyton rubrum CBS 118892
- Trichophyton verrucosum HKI 0517
- Arthroderma benhamiae CBS 112371
- Arthroderma gypseum CBS 118893
- Arthroderma otae CBS 113480
- Talaromyces stipitatus ATCC 10500
- Neosartorya fischeri
- Emericella nidulans
- Penicillium chrysogenum Wisconsin 54 1255
- Penicillium marneffei ATCC 18224
- Aspergillus clavatus
- Aspergillus flavus
- Aspergillus oryzae
- Aspergillus niger
- Aspergillus fumigatus
- Aspergillus terreus
- Monosiga brevicollis MX1
- Amphimedon queenslandica
- Trichoplax adhaerens
- Nematostella vectensis
- Hydra magnipapillata
- Schistosoma mansoni
- Trichinella spiralis
- Pristionchus pacificus
- Caenorhabditis brenneri
- Caenorhabditis briggsae
- Caenorhabditis remanei
- Caenorhabditis japonica
- Caenorhabditis elegans
- Ixodes scapularis
- Daphnia pulex
- Pediculus humanus
- Acyrtosiphon pisum
- Tribolium castaneum
- Nasonia vitripennis
- Apis mellifera
- Atta cephalotes
- Bombyx mori
- Danaus plexippus
- Heliconius melpomene
- Culex quinquefasciatus
- Aedes aegypti
- Anopheles gambiae
- Anopheles darlingi
- Drosophila virilis
- Drosophila grimshawi
- Drosophila willistoni
- Drosophila pseudoobscura
- Drosophila ananassae
- Drosophila melanogaster
- Drosophila yakuba
- Strongylocentrotus purpuratus
- Branchiostoma floridae
- Ciona intestinalis
- Ciona savignyi
- Petromyzon marinus
- Danio rerio
- Gadus morhua
- Oreochromis niloticus
- Takifugu rubripes
- Tetraodon nigroviridis
- Gasterosteus aculeatus
- Xiphophorus maculatus
- Oryzias latipes
- Latimeria chalumnae
- Xenopus (Silurana) tropicalis
- Pelodiscus sinensis
- Anolis carolinensis
- Taeniopygia guttata
- Gallus gallus
- Meleagris gallopavo
- Ornithorhynchus anatinus
- Monodelphis domestica
- Sarcophilus harrisii
- Macropus eugenii
- Dasyurus novemcinctus
- Loxodonta africana
- Echinops telfairii
- Procavia capensis
- Myotis lucifugus
- Pteropus vampyrus
- Sus scrofa
- Tursiops truncatus
- Bos taurus
- Equus caballus
- Felis catus
- Canis lupus familiaris
- Mustela putorius furo
- Alluropoda melanoleuca
- Cryptolestes cuniculus
- Cavia porcellus
- Ictidomys tridecemlineatus
- Dipodomys ordii
- Rattus norvegicus
- Mus musculus
- Tupaia belangeri
- Otolemur garrettii
- Microcebus murinus
- Tarsius syrichta
- Callithrix jacchus
- Macaca mulatta
- Nomascus leucogenys
- Pongo abelii
- Gorilla gorilla
- Pan troglodytes
- Homo sapiens
- Perkinsus marinus ATCC 50983
- Tetrahymena thermophila
- Paramecium tetraurelia strain d4 2
- Neospora caninum Liverpool
- Toxoplasma gondii
- Cryptosporidium muris RN66
- Cryptosporidium parvum Iowa II
- Cryptosporidium hominis TU502
- Theileria annulata strain Ankara
- Theileria parva strain Muguga
- Plasmodium falciparum
- Plasmodium knowlesi
- Plasmodium vivax
- Plasmodium chabaudi
- Plasmodium yoelii yoelii 17XNL
- Plasmodium berghei
- Phaeodactylum tricornutum
- Thalassiosira pseudonana
- Pythium ultimum
- Albugo liliaceae
- Hyaloperonospora arabidopsidis
- Phytophthora ramorum
- Phytophthora infestans
- Phytophthora sojae
- Trypanosoma brucei
- Trypanosoma cruzi strain CL Brener
- Leishmania braziliensis MHOM BR 75 M2904
- Leishmania mexicana MHOM GT 2001 U1103
- Leishmania major
- Leishmania donovani
- Leishmania infantum JPCM5
- Entamoeba histolytica
- Entamoeba dispar SAW760
- Dicystostellum discoideum
- Dicystostellum purpureum
- Trichomonas vaginalis G3
- Trichomonas vaginalis
- Naegleria gruberi
- Giardia lamblia ATCC 50803

- Arabis thaliana
- Arabidopsis lyrata
- Brassica rapa
- Glycine max
- Populus trichocarpa
- Vitis vinifera
- Solanum tuberosum
- Solanum lycopersicum
- Oryza sativa Indica Group
- Oryza sativa Japonica Group
- Oryza brachyantha
- Oryza glaberrima
- Hordeum vulgare
- Brachypodium distachyon
- Zea mays
- Sorghum bicolor
- Setaria italica
- Musa acuminata
- Selaginella moellendorffii
- Physcomitrella patens
- Ostreococcus tauri
- Ostreococcus lucimarinus CCE9901
- Chlamydomonas reinhardtii
- Cyanidioschyzon merolae
- Encephalitozoon hellem ATCC 50504
- Encephalitozoon intestinalis ATCC 50506
- Encephalitozoon cuniculi GB M1
- Puccinia graminis
- Puccinia triticina
- Ustilago maydis
- Melassezia globosa CBS 7966
- Cryptococcus gattii WM276
- Cryptococcus neoformans var. neoformans JEC21
- Cryptococcus neoformans var. neoformans B 3501A
- Phanerochaete chrysosporium
- Schizophyllum commune H4 B
- Coprinopsis cinerea okayama7\_130
- Laccaria bicolor S238N H82
- Schizosaccharomyces japonicus yFS275
- Schizosaccharomyces pombe
- Clavospora lusitaniae ATCC 42720
- Yarrowia lipolytica
- Candida tropicalis MYA 3404
- Candida dubliniensis CD36
- Lodderomyces elongisporus NRRL YB 4239
- Scheffersomyces stipitis CBS 6054
- Meyerozyma guilliermondii ATCC 6260
- Pichia guilliermondii
- Lachancea thermotolerans
- Kluyveromyces fragilis NRRL Y 1140
- Saccharomyces cerevisiae
- Zygosaccharomyces rouxii
- Komagataella pastoris GS115
- Vanderwaltozyma polyspora DSM 70294
- Torulopsis delbrueckii
- Candida glabrata CBS 138
- Tetrapispora phaffii CBS 4417
- Naumovozyma dairensis CBS 421
- Naumovozyma castellii CBS 4309
- Eremothecium cymbalariae DBVPG\_7215
- Eremothecium gossypii
- Tuber melanosporum
- Zymoseptoria tritici
- Phaeosphaeria nodorum
- Leptosphaeria maculans
- Pyrenophora tritici repens Pt 1C BFP
- Pyrenophora teres f. teres 0 1
- Botryotinia fuckeliana
- Sclerotinia sclerotiorum
- Verticillium albo atrum VaMs.102
- Fusarium oxysporum
- Hypocrea virens
- Hypocrea jecorina
- Nectria haematococca
- Gibberella moniliformis
- Gibberella zeae PH 1
- Gibberella zeae
- Gaeumannomyces graminis
- Magnaporthe grisea
- Magnaporthe poae
- Magnaporthe oryzae
- Podospira anserina S mat
- Neurospora crassa
- Sordaria macrospora k hell
- Myceliophthora thermophila ATCC 42464
- Chaetomium globosum CBS 148.51
- Thielavia terrestris NRRL 8126
- Uncinocarpus reesii 1704
- Ajellomyces capsulatus Nam1
- Ajellomyces dermatitidis SLH14081
- Paracoccidioides sp. lutzi Fb01
- Coccidioides posadasii C735 delta SOWgp
- Coccidioides immitis RS
- Trichophyton rubrum CBS 118892
- Trichophyton verrucosum HKI 0517
- Arthroderma benhamiae CBS 112371
- Arthroderma gypseum CBS 118893
- Arthroderma otae CBS 113480
- Talaromyces stipitatus ATCC 10500
- Neosartorya fischeri
- Emericella nidulans
- Penicillium chrysogenum Wisconsin 54 1255
- Penicillium marneffei ATCC 18224
- Aspergillus clavatus
- Aspergillus flavus
- Aspergillus oryzae
- Aspergillus niger
- Aspergillus fumigatus
- Aspergillus terreus
- Monosiga brevicollis MX1
- Amphimedon queenslandica
- Trichoplax adhaerens
- Nematostella vectensis
- Hydra magnipapillata
- Schistosoma mansoni
- Trichinella spiralis
- Pristionchus pacificus
- Caenorhabditis brenneri
- Caenorhabditis briggsae
- Caenorhabditis remanei
- Caenorhabditis japonica
- Caenorhabditis elegans
- Ixodes scapularis
- Daphnia pulex
- Pediculus humanus
- Acyrtosiphon pisum
- Tribolium castaneum
- Nasonia vitripennis
- Apis mellifera
- Atta cephalotes
- Bombyx mori
- Danaus plexippus
- Heliconius melpomene
- Culex quinquefasciatus
- Aedes aegypti
- Anopheles gambiae
- Anopheles darlingi
- Drosophila virilis
- Drosophila grimshawi
- Drosophila willistoni
- Drosophila pseudoobscura
- Drosophila ananassae
- Drosophila melanogaster
- Drosophila yakuba
- Strongylocentrotus purpuratus
- Branchiostoma floridae
- Ciona intestinalis
- Ciona savignyi
- Petromyzon marinus
- Danio rerio
- Gadus morhua
- Oreochromis niloticus
- Takifugu rubripes
- Tetraodon nigroviridis
- Gasterosteus aculeatus
- Xiphophorus maculatus
- Oryzias latipes
- Latimeria chalumnae
- Xenopus (Silurana) tropicalis
- Pelodiscus sinensis
- Anolis carolinensis
- Taeniopygia guttata
- Gallus gallus
- Meleagris gallopavo
- Ornithorhynchus anatinus
- Monodelphis domestica
- Sarcophilus harrisii
- Macropus eugenii
- Dasyurus novemcinctus
- Loxodonta africana
- Echinops telillari
- Procavia capensis
- Myotis lucifugus
- Pteropus vampyrus
- Sus scrofa
- Tursiops truncatus
- Bos taurus
- Equus caballus
- Felis catus
- Canis lupus familiaris
- Mustela putorius furo
- Alluropoda melanoleuca
- Cryptolestes cuniculus
- Cavia porcellus
- Ictidomys tridecemlineatus
- Dipodomys ordii
- Rattus norvegicus
- Mus musculus
- Tupaia belangeri
- Otolomus garrettii
- Microcebus murinus
- Tarsius syrichta
- Callithrix jacchus
- Macaca mulatta
- Nomascus leucogenys
- Pongo abelii
- Gorilla gorilla
- Pan troglodytes
- Homo sapiens
- Perkinsus marinus ATCC 50983
- Tetrahymena thermophila
- Paramecium tetraurelia strain d4 2
- Neospora caninum Liverpool
- Toxoplasma gondii
- Cryptosporidium muris RN66
- Cryptosporidium parvum Iowa II
- Cryptosporidium hominis TU502
- Theileria annulata strain Ankara
- Theileria parva strain Muguga
- Plasmodium falciparum
- Plasmodium knowlesi
- Plasmodium vivax
- Plasmodium chabaudi
- Plasmodium yoelii yoelii 17XNL
- Plasmodium berghei
- Phaeodactylum tricornutum
- Thalassiosira pseudonana
- Pythium ultimum
- Albugo liliaceae
- Hyaloperonospora arabidopsidis
- Phytophthora ramorum
- Phytophthora infestans
- Phytophthora sojae
- Trypanosoma brucei
- Trypanosoma cruzi strain CL Brener
- Leishmania braziliensis MHOM BR 75 M2904
- Leishmania mexicana MHOM GT 2001 U1103
- Leishmania major
- Leishmania donovani
- Leishmania infantum JPCM5
- Entamoeba histolytica
- Entamoeba dispar SAW760
- Dicystostellum discoideum
- Dicystostellum purpureum
- Trichomonas vaginalis G3
- Trichomonas vaginalis
- Naegleria gruberi
- Giardia lamblia ATCC 50803

- OG presence
- OG absence
- Inferred root

Dscore = 1  
Pvalue = 1.26e-05  
AdjPvalue = 1.50e-03

- Arabis thaliana
- Arabidopsis lyrata
- Brassica rapa
- Glycine max
- Populus trichocarpa
- Vitis vinifera
- Solanum tuberosum
- Solanum lycopersicum
- Oryza sativa Indica Group
- Oryza sativa Japonica Group
- Oryza brachyantha
- Oryza glaberrima
- Hordeum vulgare
- Brachypodium distachyon
- Zea mays
- Sorghum bicolor
- Setaria italica
- Musa acuminata
- Selaginella moellendorffii
- Physcomitrella patens
- Ostreococcus tauri
- Ostreococcus lucimarinus CCE9901
- Chlamydomonas reinhardtii
- Cyanidioschyzon merolae
- Encephalitozoon hellem ATCC 50504
- Encephalitozoon intestinalis ATCC 50506
- Encephalitozoon cuniculi GB M1
- Puccinia graminis
- Puccinia triticina
- Ustilago maydis
- Melassezia globosa CBS 7966
- Cryptococcus gattii WM276
- Cryptococcus neoformans var. neoformans JEC21
- Cryptococcus neoformans var. neoformans B 3501A
- Phanerochaete chrysosporium
- Schizophyllum commune H4 B
- Coprinopsis cinerea okayama7\_130
- Laccaria bicolor S238N H82
- Schizosaccharomyces japonicus yFS275
- Schizosaccharomyces pombe
- Clavospora lusitanae ATCC 42720
- Yarrowia lipolytica
- Candida tropicalis MYA 3404
- Candida dubliniensis CD36
- Lodderomyces elongisporus NRRL YB 4239
- Scheffersomyces stipitis CBS 6054
- Meyerozyma guilliermondii ATCC 6260
- Pichia guilliermondii
- Lachancea thermotolerans
- Kluyveromyces fragilis NRRL Y 1140
- Saccharomyces cerevisiae
- Zygosaccharomyces rouxii
- Komagataella pastoris GS115
- Vanderwaltozyma polyspora DSM 70294
- Torulopsis delbrueckii
- Candida glabrata CBS 138
- Tetrapispora phaffii CBS 4417
- Naumovozyma dairenensis CBS 421
- Naumovozyma castellii CBS 4309
- Eremothecium cymbalariae DBVPG\_7215
- Eremothecium gossypii
- Tuber melanosporum
- Zymoseptoria tritici
- Phaeosphaeria nodorum
- Leptosphaeria maculans
- Pyrenophora tritici repens Pt 1C BFP
- Pyrenophora teres f. teres 0 1
- Botryotinia fuckeliana
- Sclerotinia sclerotiorum
- Verticillium albo atrum VaMs.102
- Fusarium oxysporum
- Hypocrea virens
- Hypocrea jecorina
- Nectria haematococca
- Gibberella moniliformis
- Gibberella zeae PH 1
- Gibberella zeae
- Gaeumannomyces graminis
- Magnaporthe grisea
- Magnaporthe poae
- Magnaporthe oryzae
- Podospira anserina S mat
- Neurospora crassa
- Sordaria macrospora k hell
- Myceliophthora thermophila ATCC 42464
- Chaetomium globosum CBS 148.51
- Thielavia terrestris NRRL 8126
- Uncinocarpus reesii 1704
- Ajellomyces capsulatus Nam1
- Ajellomyces dermatitidis SLH14081
- Paracoccidioides sp. lutzi Fb01
- Coccidioides posadasii C735 delta SOWgp
- Coccidioides immitis RS
- Trichophyton rubrum CBS 118892
- Trichophyton verrucosum HKI 0517
- Arthroderma benhamiae CBS 112371
- Arthroderma gypseum CBS 118893
- Arthroderma otae CBS 113480
- Talaromyces stipitatus ATCC 10500
- Neosartorya fischeri
- Emericella nidulans
- Penicillium chrysogenum Wisconsin 54 1255
- Penicillium marneffei ATCC 18224
- Aspergillus clavatus
- Aspergillus flavus
- Aspergillus oryzae
- Aspergillus niger
- Aspergillus fumigatus
- Aspergillus terreus
- Monosiga brevicollis MX1
- Amphimedon queenslandica
- Trichoplax adhaerens
- Nematostella vectensis
- Hydra magnipapillata
- Schistosoma mansoni
- Trichiella spiralis
- Pristionchus pacificus
- Caenorhabditis brenneri
- Caenorhabditis briggsae
- Caenorhabditis remanei
- Caenorhabditis japonica
- Caenorhabditis elegans
- Ixodes scapularis
- Daphnia pulex
- Pediculus humanus
- Acyrtosiphon pisum
- Tribolium castaneum
- Nasonia vitripennis
- Apis mellifera
- Atta cephalotes
- Bombyx mori
- Danaus plexippus
- Heliconius melpomene
- Culex quinquefasciatus
- Aedes aegypti
- Anopheles gambiae
- Anopheles darlingi
- Drosophila virilis
- Drosophila grimshawi
- Drosophila willistoni
- Drosophila pseudoobscura
- Drosophila ananassae
- Drosophila melanogaster
- Drosophila yakuba
- Strongylocentrotus purpuratus
- Branchiostoma floridae
- Ciona intestinalis
- Ciona savignyi
- Petromyzon marinus
- Danio rerio
- Gadus morhua
- Oreochromis niloticus
- Takifugu rubripes
- Tetraodon nigroviridis
- Gasterosteus aculeatus
- Xiphophorus maculatus
- Oryzias latipes
- Latimeria chalumnae
- Xenopus (Silurana) tropicalis
- Pelodiscus sinensis
- Anolis carolinensis
- Taeniopygia guttata
- Gallus gallus
- Meleagris gallopavo
- Ornithorhynchus anatinus
- Monodelphis domestica
- Sarcophilus harrisii
- Macropus eugenii
- Dasyurus novemcinctus
- Loxodonta africana
- Echinosorex tillarii
- Procavia capensis
- Myotis lucifugus
- Pteropus vampyrus
- Sus scrofa
- Tursiops truncatus
- Bos taurus
- Equus caballus
- Felis catus
- Canis lupus familiaris
- Mustela putorius furo
- Alluropoda melanoleuca
- Cryptolestes cuniculus
- Cavia porcellus
- Ictidomys tridecemlineatus
- Dipodomys ordii
- Rattus norvegicus
- Mus musculus
- Tupaia belangeri
- Otolomus garretti
- Microcebus murinus
- Tarsius syrichta
- Callithrix jacchus
- Macaca mulatta
- Nomascus leucogenys
- Pongo abelii
- Gorilla gorilla
- Pan troglodytes
- Homo sapiens
- Perkinsus marinus ATCC 50983
- Tetrahymena thermophila
- Paramecium tetraurelia strain d4 2
- Neospora caninum Liverpool
- Toxoplasma gondii
- Cryptosporidium muris RN66
- Cryptosporidium parvum Iowa II
- Cryptosporidium hominis TU502
- Theileria annulata strain Ankara
- Theileria parva strain Muguga
- Plasmodium falciparum
- Plasmodium knowlesi
- Plasmodium vivax
- Plasmodium chabaudi
- Plasmodium yoelii yoelii 17XNL
- Plasmodium berghei
- Phaeodactylum tricornutum
- Thalassiosira pseudonana
- Pythium ultimum
- Albugo liliaceae
- Hyaloperonospora arabidopsidis
- Phytophthora ramorum
- Phytophthora infestans
- Phytophthora sojae
- Trypanosoma brucei
- Trypanosoma cruzi strain CL Brener
- Leishmania braziliensis MHOM BR 75 M2904
- Leishmania mexicana MHOM GT 2001 U1103
- Leishmania major
- Leishmania donovani
- Leishmania infantum JPCM5
- Entamoeba histolytica
- Entamoeba dispar SAW760
- Dicystostellum discoideum
- Dicystostellum purpureum
- Trichomonas vaginalis G3
- Trichomonas vaginalis
- Naegleria gruberi
- Giardia lamblia ATCC 50803

- OG presence
- OG absence
- Inferred root

Dscore = 0.993  
Pvalue = 9.81e-06  
AdjPvalue = 1.17e-03

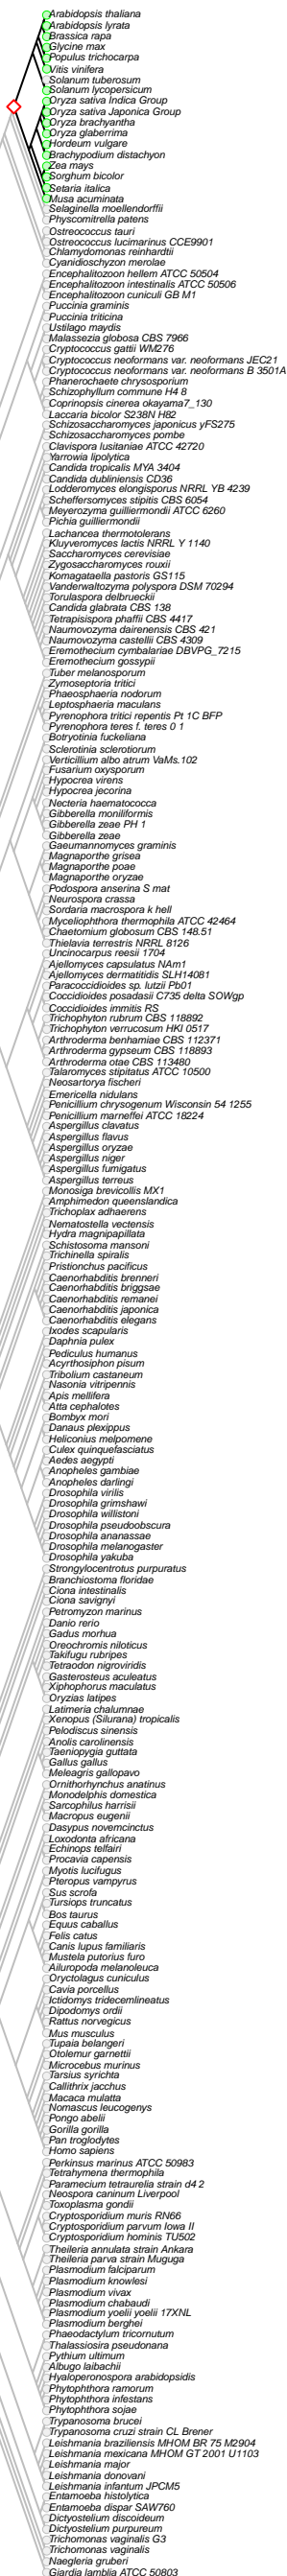

● OG presence  
 ○ OG absence  
 ◆ Inferred root

Dscore = 0.952  
 Pvalue = 2.01e-05  
 AdjPvalue = 2.39e-03

- Arabis thaliana
- Arabidopsis lyrata
- Brassica rapa
- Glycine max
- Populus trichocarpa
- Vitis vinifera
- Solanum tuberosum
- Solanum lycopersicum
- Oryza sativa Indica Group
- Oryza sativa Japonica Group
- Oryza brachyantha
- Oryza glaberrima
- Hordeum vulgare
- Brachypodium distachyon
- Zea mays
- Sorghum bicolor
- Setaria italica
- Musa acuminata
- Selaginella moellendorffii
- Physcomitrella patens
- Ostreococcus tauri
- Ostreococcus lucimarinus CCE9901
- Chlamydomonas reinhardtii
- Cyanidioschyzon merolae
- Encephalitozoon hellem ATCC 50504
- Encephalitozoon intestinalis ATCC 50506
- Encephalitozoon cuniculi GB M1
- Puccinia graminis
- Puccinia triticina
- Ustilago maydis
- Melassezia globosa CBS 7966
- Cryptococcus gattii WM276
- Cryptococcus neoformans var. neoformans JEC21
- Cryptococcus neoformans var. neoformans B 3501A
- Phanerochaete chrysosporium
- Schizophyllum commune H4 B
- Coprinopsis cinerea okayama7\_130
- Laccaria bicolor S238N H82
- Schizosaccharomyces japonicus yFS275
- Schizosaccharomyces pombe
- Clavospora lusitanae ATCC 42720
- Yarrowia lipolytica
- Candida tropicalis MYA 3404
- Candida dubliniensis CD36
- Lodderomyces elongisporus NRRL YB 4239
- Scheffersomyces stipitis CBS 6054
- Meyerozyma guilliermondii ATCC 6260
- Pichia guilliermondii
- Lachancea thermotolerans
- Kluyveromyces fragilis NRRL Y 1140
- Saccharomyces cerevisiae
- Zygosaccharomyces rouxii
- Komagataella pastoris GS115
- Vanderwaltozyma polyspora DSM 70294
- Torulopsis delbrueckii
- Candida glabrata CBS 138
- Tetrapispora phaffii CBS 4417
- Naumovozyma dairensis CBS 421
- Naumovozyma castellii CBS 4309
- Eremothecium cymbalariae DBVPG\_7215
- Eremothecium gossypii
- Tuber melanosporum
- Zymoseptoria tritici
- Phaeosphaeria nodorum
- Leptosphaeria maculans
- Pyrenophora tritici repens Pt 1C BFP
- Pyrenophora teres f. teres 0 1
- Botryotinia fuckeliana
- Sclerotinia sclerotiorum
- Verticillium albo atrum VaMs.102
- Fusarium oxysporum
- Hypocrea virens
- Hypocrea jecorina
- Nectria haematococca
- Gibberella moniliformis
- Gibberella zeae PH 1
- Gibberella zeae
- Gaeumannomyces graminis
- Magnaporthe grisea
- Magnaporthe poae
- Magnaporthe oryzae
- Podospira anserina S mat
- Neurospora crassa
- Sordaria macrospora k hell
- Myceliophthora thermophila ATCC 42464
- Chaetomium globosum CBS 148.51
- Thielavia terrestris NRRL 8126
- Uncinocarpus reesii 1704
- Ajellomyces capsulatus Nam1
- Ajellomyces dermatitidis SLH14081
- Paracoccidioides sp. lutzi Fb01
- Coccidioides posadasii C735 delta SOWgp
- Coccidioides immitis RS
- Trichophyton rubrum CBS 118892
- Trichophyton verrucosum HKI 0517
- Arthroderma benhamiae CBS 112371
- Arthroderma gypseum CBS 118893
- Arthroderma otae CBS 113480
- Talaromyces stipitatus ATCC 10500
- Neosartorya fischeri
- Emericella nidulans
- Penicillium chrysogenum Wisconsin 54 1255
- Penicillium marneffei ATCC 18224
- Aspergillus clavatus
- Aspergillus flavus
- Aspergillus oryzae
- Aspergillus niger
- Aspergillus fumigatus
- Aspergillus terreus
- Monosiga brevicollis MX1
- Amphimedon queenslandica
- Trichoplax adhaerens
- Nematostella vectensis
- Hydra magnipapillata
- Schistosoma mansoni
- Trichinella spiralis
- Pristionchus pacificus
- Caenorhabditis breneri
- Caenorhabditis briggsae
- Caenorhabditis remanei
- Caenorhabditis japonica
- Caenorhabditis elegans
- Ixodes scapularis
- Daphnia pulex
- Pediculus humanus
- Acyrtosiphon pisum
- Tribolium castaneum
- Nasonia vitripennis
- Apis mellifera
- Atta cephalotes
- Bombyx mori
- Danaus plexippus
- Heliconia melpomene
- Culex quinquefasciatus
- Aedes aegypti
- Anopheles gambiae
- Anopheles darlingi
- Drosophila virilis
- Drosophila grimshawi
- Drosophila willistoni
- Drosophila pseudoobscura
- Drosophila ananassae
- Drosophila melanogaster
- Drosophila yakuba
- Strongylocentrotus purpuratus
- Branchiostoma floridae
- Ciona intestinalis
- Ciona savignyi
- Petromyzon marinus
- Danio rerio
- Gadus morhua
- Oreochromis niloticus
- Takifugu rubripes
- Tetraodon nigroviridis
- Gasterosteus aculeatus
- Xiphophorus maculatus
- Oryzias latipes
- Latimeria chalumnae
- Xenopus (Silurana) tropicalis
- Pelodiscus sinensis
- Anolis carolinensis
- Taeniopygia guttata
- Gallus gallus
- Meleagris gallopavo
- Ornithorhynchus anatinus
- Monodelphis domestica
- Sarcophilus harrisii
- Macropus eugenii
- Dasyurus novemcinctus
- Loxodonta africana
- Echinops telitarii
- Procavia capensis
- Myotis lucifugus
- Pteropus vampyrus
- Sus scrofa
- Tursiops truncatus
- Bos taurus
- Equus caballus
- Felis catus
- Canis lupus familiaris
- Mustela putorius furo
- Alluropoda melanoleuca
- Cryptolestes cuniculus
- Cavia porcellus
- Ictidomys tridecemlineatus
- Dipodomys ordii
- Rattus norvegicus
- Mus musculus
- Tupaia belangeri
- Otolomus garretti
- Microcebus murinus
- Tarsius syrichta
- Callithrix jacchus
- Macaca mulatta
- Nomascus leucogenys
- Pongo abelii
- Gorilla gorilla
- Pan troglodytes
- Homo sapiens
- Perkinsus marinus ATCC 50983
- Tetrahymena thermophila
- Paramecium tetraurelia strain d4 2
- Neospora caninum Liverpool
- Toxoplasma gondii
- Cryptosporidium muris RN66
- Cryptosporidium parvum Iowa II
- Cryptosporidium hominis TU502
- Theileria annulata strain Ankara
- Theileria parva strain Muguga
- Plasmodium falciparum
- Plasmodium knowlesi
- Plasmodium vivax
- Plasmodium chabaudi
- Plasmodium yoelii yoelii 17XNL
- Plasmodium berghei
- Phaeodactylum tricornutum
- Thalassiosira pseudonana
- Pythium ultimum
- Albugo liliaceae
- Hyaloperonospora arabidopsidis
- Phytophthora ramorum
- Phytophthora infestans
- Phytophthora sojae
- Trypanosoma brucei
- Trypanosoma cruzi strain CL Brener
- Leishmania braziliensis MHOM BR 75 M2904
- Leishmania mexicana MHOM GT 2001 U1103
- Leishmania major
- Leishmania donovani
- Leishmania infantum JPCM5
- Entamoeba histolytica
- Entamoeba dispar SAW760
- Dicystostellum discoideum
- Dicystostellum purpureum
- Trichomonas vaginalis G3
- Trichomonas vaginalis
- Naegleria gruberi
- Giardia lamblia ATCC 50803

- OG presence
- OG absence
- Inferred root

Dscore = 0.889  
Pvalue = 4.43e-05  
AdjPvalue = 5.27e-03



- Arabis thaliana
- Arabidopsis lyrata
- Brassica rapa
- Glycine max
- Populus trichocarpa
- Vitis vinifera
- Solanum tuberosum
- Solanum lycopersicum
- Oryza sativa Indica Group
- Oryza sativa Japonica Group
- Oryza brachyantha
- Oryza glaberrima
- Hordeum vulgare
- Brachypodium distachyon
- Zea mays
- Sorghum bicolor
- Setaria italica
- Musa acuminata
- Salvinella moellendorffii
- Physcomitrella patens
- Ostreococcus tauri
- Ostreococcus lucimarinus CCE9901
- Chlamydomonas reinhardtii
- Cyanidioschyzon merolae
- Encephalitozoon hellem ATCC 50504
- Encephalitozoon intestinalis ATCC 50506
- Encephalitozoon cuniculi GB M1
- Puccinia graminis
- Puccinia triticina
- Ustilago maydis
- Melassezia globosa CBS 7966
- Cryptococcus gattii WM276
- Cryptococcus neoformans var. neoformans JEC21
- Cryptococcus neoformans var. neoformans B 3501A
- Phanerochaete chrysosporium
- Schizophyllum commune H4 B
- Coprinopsis cinerea okayama7\_130
- Laccaria bicolor S238N H82
- Schizosaccharomyces japonicus yFS275
- Schizosaccharomyces pombe
- Clavospora lusitanae ATCC 42720
- Yarrowia lipolytica
- Candida tropicalis MYA 3404
- Candida dubliniensis CD36
- Lodderomyces elongisporus NRRL YB 4239
- Scheffersomyces stipitis CBS 6054
- Meyerozyma guilliermondii ATCC 6260
- Pichia guilliermondii
- Lachancea thermotolerans
- Kluyveromyces fragilis NRRL Y 1140
- Saccharomyces cerevisiae
- Zygosaccharomyces rouxii
- Komagataella pastoris GS115
- Vanderwaltozyma polyspora DSM 70294
- Torulopsis delbrueckii
- Candida glabrata CBS 138
- Tetrapispora phaffii CBS 4417
- Naumovozyma dairensis CBS 421
- Naumovozyma castellii CBS 4309
- Eremothecium cymbalariae DBVPG\_7215
- Eremothecium gossypii
- Tuber melanosporum
- Zymoseptoria tritici
- Phaeosphaeria nodorum
- Leptosphaeria maculans
- Pyrenophora tritici repens Pt 1C BFP
- Pyrenophora teres f. teres 0 1
- Botryotinia fuckeliana
- Sclerotinia sclerotiorum
- Verticillium albo atrum VaMs.102
- Fusarium oxysporum
- Hypocrea virens
- Hypocrea jecorina
- Nectria haematococca
- Gibberella moniliformis
- Gibberella zeae PH 1
- Gibberella zeae
- Gaeumannomyces graminis
- Magnaporthe grisea
- Magnaporthe poae
- Magnaporthe oryzae
- Podospira anserina S mat
- Neurospora crassa
- Sordaria macrospora k hell
- Myceliophthora thermophila ATCC 42464
- Chaetomium globosum CBS 148.51
- Thielavia terrestris NRRL 8126
- Uncinocarpus reesii 1704
- Ajellomyces capsulatus Nam1
- Ajellomyces dermatitidis SLH14081
- Paracoccidioides sp. lutzi Fb01
- Coccidioides posadasii C735 delta SOWgp
- Coccidioides immitis RS
- Trichophyton rubrum CBS 118892
- Trichophyton verrucosum HKI 0517
- Arthroderma benhamiae CBS 112371
- Arthroderma gypseum CBS 118893
- Arthroderma otae CBS 113480
- Talaromyces stipitatus ATCC 10500
- Neosartorya fischeri
- Emericella nidulans
- Penicillium chrysogenum Wisconsin 54 1255
- Penicillium marneffei ATCC 18224
- Aspergillus clavatus
- Aspergillus flavus
- Aspergillus oryzae
- Aspergillus niger
- Aspergillus fumigatus
- Aspergillus terreus
- Monosiga brevicollis MX1
- Amphimedon queenslandica
- Trichoplax adhaerens
- Nematostella vectensis
- Hydra magnipapillata
- Schistosoma mansoni
- Trichinella spiralis
- Pristionchus pacificus
- Caenorhabditis brenneri
- Caenorhabditis briggsae
- Caenorhabditis remanei
- Caenorhabditis japonica
- Caenorhabditis elegans
- Ixodes scapularis
- Daphnia pulex
- Pediculus humanus
- Acyrtosiphon pisum
- Tribolium castaneum
- Nasonia vitripennis
- Apis mellifera
- Atta cephalotes
- Bombyx mori
- Danaus plexippus
- Heliconius melpomene
- Culex quinquefasciatus
- Aedes aegypti
- Anopheles gambiae
- Anopheles darlingi
- Drosophila virilis
- Drosophila grimshawi
- Drosophila willistoni
- Drosophila pseudoobscura
- Drosophila ananassae
- Drosophila melanogaster
- Drosophila yakuba
- Strongylocentrotus purpuratus
- Branchiostoma floridae
- Ciona intestinalis
- Ciona savignyi
- Petromyzon marinus
- Danio rerio
- Gadus morhua
- Oreochromis niloticus
- Takifugu rubripes
- Tetraodon nigroviridis
- Gasterosteus aculeatus
- Xiphophorus maculatus
- Oryzias latipes
- Latimeria chalumnae
- Xenopus (Silurana) tropicalis
- Pelodiscus sinensis
- Anolis carolinensis
- Taeniopygia guttata
- Gallus gallus
- Meleagris gallopavo
- Ornithorhynchus anatinus
- Monodelphis domestica
- Sarcophilus harrisii
- Macropus eugenii
- Dasyurus novemcinctus
- Loxodonta africana
- Echinops telillari
- Procavia capensis
- Myotis lucifugus
- Pteropus vampyrus
- Sus scrofa
- Tursiops truncatus
- Bos taurus
- Equus caballus
- Felis catus
- Canis lupus familiaris
- Mustela putorius furo
- Alluropoda melanoleuca
- Cryptolestes cuniculus
- Cavia porcellus
- Ictidomys tridecemlineatus
- Dipodomys ordii
- Rattus norvegicus
- Mus musculus
- Tupaia belangeri
- Otolemur garrettii
- Microcebus murinus
- Tarsius syrichta
- Callithrix jacchus
- Macaca mulatta
- Nomascus leucogenys
- Pongo abelii
- Gorilla gorilla
- Pan troglodytes
- Homo sapiens
- Perkinsus marinus ATCC 50983
- Tetrahymena thermophila
- Paramecium tetraurelia strain d4 2
- Neospora caninum Liverpool
- Toxoplasma gondii
- Cryptosporidium muris RN66
- Cryptosporidium parvum Iowa II
- Cryptosporidium hominis TU502
- Theileria annulata strain Ankara
- Theileria parva strain Muguga
- Plasmodium falciparum
- Plasmodium knowlesi
- Plasmodium vivax
- Plasmodium chabaudi
- Plasmodium yoelii yoelii 17XNL
- Plasmodium berghei
- Phaeodactylum tricornutum
- Thalassiosira pseudonana
- Pythium ultimum
- Albugo liliaceae
- Hyaloperonospora arabidopsidis
- Phytophthora ramorum
- Phytophthora infestans
- Phytophthora sojae
- Trypanosoma brucei
- Trypanosoma cruzi strain CL Brener
- Leishmania braziliensis MHOM BR 75 M2904
- Leishmania mexicana MHOM GT 2001 U1103
- Leishmania major
- Leishmania donovani
- Leishmania infantum JPCM5
- Entamoeba histolytica
- Entamoeba dispar SAW760
- Dicystostellum discoideum
- Dicystostellum purpureum
- Trichomonas vaginalis G3
- Trichomonas vaginalis
- Naegleria gruberi
- Giardia lamblia ATCC 50803

- OG presence
- OG absence
- Inferred root

Dscore = 0.952  
Pvalue = 1.06e-05  
AdjPvalue = 1.26e-03

- Arabis thaliana
- Arabidopsis lyrata
- Brassica rapa
- Glycine max
- Populus trichocarpa
- Vitis vinifera
- Solanum tuberosum
- Solanum lycopersicum
- Oryza sativa Indica Group
- Oryza sativa Japonica Group
- Oryza brachyantha
- Oryza glaberrima
- Hordeum vulgare
- Brachypodium distachyon
- Zea mays
- Sorghum bicolor
- Setaria italica
- Musa acuminata
- Selaginella moellendorffii
- Physcomitrella patens
- Ostreococcus tauri
- Ostreococcus lucimarinus CCE9901
- Chlamydomonas reinhardtii
- Cyanidioschyzon merolae
- Encephalitozoon hellem ATCC 50504
- Encephalitozoon intestinalis ATCC 50506
- Encephalitozoon cuniculi GB M1
- Puccinia graminis
- Puccinia triticina
- Ustilago maydis
- Melassezia globosa CBS 7966
- Cryptococcus gattii WM276
- Cryptococcus neoformans var. neoformans JEC21
- Cryptococcus neoformans var. neoformans B 3501A
- Phanerochaete chrysosporium
- Schizophyllum commune H4 B
- Coprinopsis cinerea okayama7\_130
- Laccaria bicolor S238N H82
- Schizosaccharomyces japonicus yFS275
- Schizosaccharomyces pombe
- Clavospora lusitanae ATCC 42720
- Yarrowia lipolytica
- Candida tropicalis MYA 3404
- Candida dubliniensis CD36
- Lodderomyces elongisporus NRRL YB 4239
- Scheffersomyces stipitis CBS 6054
- Meyerozyma guilliermondii ATCC 6260
- Pichia guilliermondii
- Lachancea thermotolerans
- Kluyveromyces fragilis NRRL Y 1140
- Saccharomyces cerevisiae
- Zygosaccharomyces rouxii
- Komagataella pastoris GS115
- Vanderwaltozyma polyspora DSM 70294
- Torulopsis delbrueckii
- Candida glabrata CBS 138
- Tetrapispora phaffii CBS 4417
- Naumovozyma dairensis CBS 421
- Naumovozyma castellii CBS 4309
- Eremothecium cymbalariae DBVPG\_7215
- Eremothecium gossypii
- Tuber melanosporum
- Zymoseptoria tritici
- Phaeosphaeria nodorum
- Leptosphaeria maculans
- Pyrenophora tritici repens Pt 1C BFP
- Pyrenophora teres f. teres 0 1
- Botryotinia fuckeliana
- Sclerotinia sclerotiorum
- Verticillium albo atrum VaMs.102
- Fusarium oxysporum
- Hypocrea virens
- Hypocrea jecorina
- Nectria haematococca
- Gibberella moniliformis
- Gibberella zeae PH 1
- Gibberella zeae
- Gaeumannomyces graminis
- Magnaporthe grisea
- Magnaporthe poae
- Magnaporthe oryzae
- Podospira anserina S mat
- Neurospora crassa
- Sordaria macrospora k hell
- Myceliophthora thermophila ATCC 42464
- Chaetomium globosum CBS 148.51
- Thielavia terrestris NRRL 8126
- Uncinocarpus reesii 1704
- Ajellomyces capsulatus Nam1
- Ajellomyces dermatitidis SLH14081
- Paracoccidioides sp. lutzi Fb01
- Coccidioides posadasii C735 delta SOWgp
- Coccidioides immitis RS
- Trichophyton rubrum CBS 118892
- Trichophyton verrucosum HKI 0517
- Arthroderma benhamiae CBS 112371
- Arthroderma gypseum CBS 118893
- Arthroderma otae CBS 113480
- Talaromyces stipitatus ATCC 10500
- Neosartorya fischeri
- Emericella nidulans
- Penicillium chrysogenum Wisconsin 54 1255
- Penicillium marneffei ATCC 18224
- Aspergillus clavatus
- Aspergillus flavus
- Aspergillus oryzae
- Aspergillus niger
- Aspergillus fumigatus
- Aspergillus terreus
- Monosiga brevicollis MX1
- Amphimedon queenslandica
- Trichoplax adhaerens
- Nematostella vectensis
- Hydra magnipapillata
- Schistosoma mansoni
- Trichinella spiralis
- Pristionchus pacificus
- Caenorhabditis breneri
- Caenorhabditis briggsae
- Caenorhabditis remanei
- Caenorhabditis japonica
- Caenorhabditis elegans
- Ixodes scapularis
- Daphnia pulex
- Pediculus humanus
- Acyrtosiphon pisum
- Tribolium castaneum
- Nasonia vitripennis
- Apis mellifera
- Atta cephalotes
- Bombyx mori
- Danaus plexippus
- Heliconius melpomene
- Culex quinquefasciatus
- Aedes aegypti
- Anopheles gambiae
- Anopheles darlingi
- Drosophila virilis
- Drosophila grimshawi
- Drosophila willistoni
- Drosophila pseudoobscura
- Drosophila ananassae
- Drosophila melanogaster
- Drosophila yakuba
- Strongylocentrotus purpuratus
- Branchiostoma floridae
- Ciona intestinalis
- Ciona savignyi
- Petromyzon marinus
- Danio rerio
- Gadus morhua
- Oreochromis niloticus
- Takifugu rubripes
- Tetraodon nigroviridis
- Gasterosteus aculeatus
- Xiphophorus maculatus
- Oryzias latipes
- Latimeria chalumnae
- Xenopus (Silurana) tropicalis
- Pelodiscus sinensis
- Anolis carolinensis
- Taeniopygia guttata
- Gallus gallus
- Meleagris gallopavo
- Ornithorhynchus anatinus
- Monodelphis domestica
- Sarcophilus harrisii
- Macropus eugenii
- Dasyurus novemcinctus
- Loxodonta africana
- Echinops telillari
- Procavia capensis
- Myotis lucifugus
- Pteropus vampyrus
- Sus scrofa
- Tursiops truncatus
- Bos taurus
- Equus caballus
- Felis catus
- Canis lupus familiaris
- Mustela putorius furo
- Alluropoda melanoleuca
- Cryptolestes cuniculus
- Cavia porcellus
- Ictidomys tridecemlineatus
- Dipodomys ordii
- Rattus norvegicus
- Mus musculus
- Tupaia belangeri
- Otolomus garretti
- Microcebus murinus
- Tarsius syrichta
- Callithrix jacchus
- Macaca mulatta
- Nomascus leucogenys
- Pongo abelii
- Gorilla gorilla
- Pan troglodytes
- Homo sapiens
- Perkinsus marinus ATCC 50983
- Tetrahymena thermophila
- Paramecium tetraurelia strain d4 2
- Neospora caninum Liverpool
- Toxoplasma gondii
- Cryptosporidium muris RN66
- Cryptosporidium parvum Iowa II
- Cryptosporidium hominis TU502
- Theileria annulata strain Ankara
- Theileria parva strain Muguga
- Plasmodium falciparum
- Plasmodium knowlesi
- Plasmodium vivax
- Plasmodium chabaudi
- Plasmodium yoelii yoelii 17XNL
- Plasmodium berghei
- Phaeodactylum tricornutum
- Thalassiosira pseudonana
- Pythium ultimum
- Albugo liliaceae
- Hyaloperonospora arabidopsidis
- Phytophthora ramorum
- Phytophthora infestans
- Phytophthora sojae
- Trypanosoma brucei
- Trypanosoma cruzi strain CL Brener
- Leishmania braziliensis MHOM BR 75 M2904
- Leishmania mexicana MHOM GT 2001 U1103
- Leishmania major
- Leishmania donovani
- Leishmania infantum JPCM5
- Entamoeba histolytica
- Entamoeba dispar SAW760
- Dicystostellum discoideum
- Dicystostellum purpureum
- Trichomonas vaginalis G3
- Trichomonas vaginalis
- Naegleria gruberi
- Giardia lamblia ATCC 50803

- OG presence
- OG absence
- Inferred root

Dscore = 1  
Pvalue = 1.55e-05  
AdjPvalue = 1.85e-03

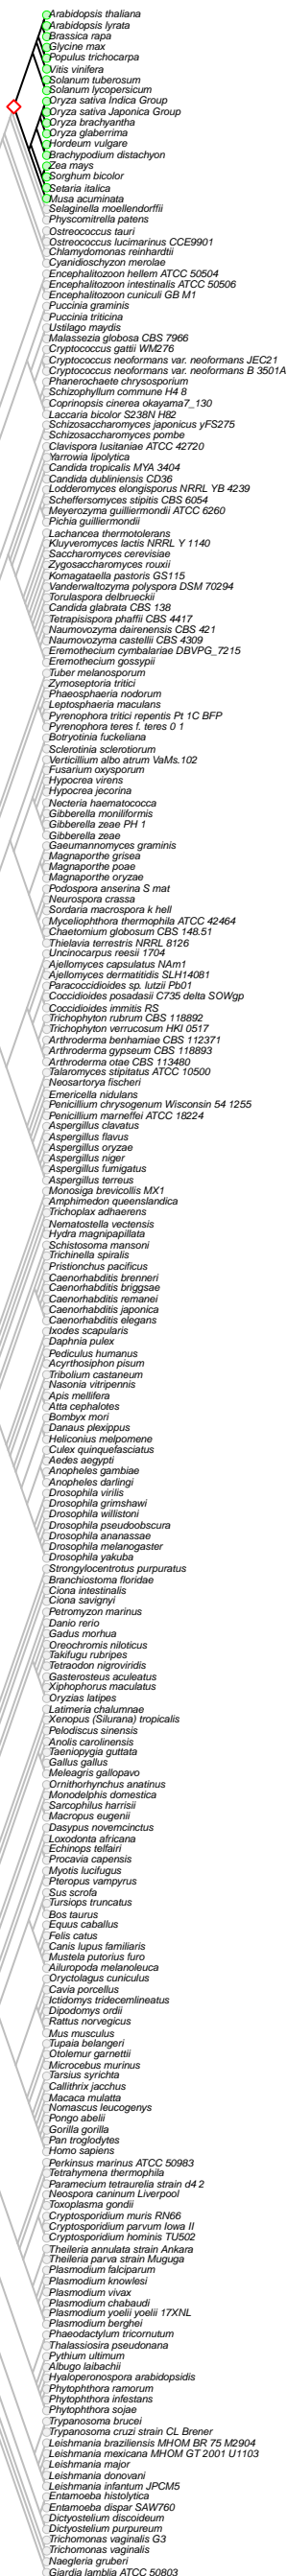

● OG presence  
● OG absence  
◆ Inferred root

Dscore = 1  
 Pvalue = 6.74e-06  
 AdjPvalue = 8.03e-04

*Giardia lamblia* ATCC 50803

- Arabis thaliana
- Arabidopsis lyrata
- Brassica rapa
- Glycine max
- Populus trichocarpa
- Vitis vinifera
- Solanum tuberosum
- Solanum lycopersicum
- Oryza sativa Indica Group
- Oryza sativa Japonica Group
- Oryza brachyantha
- Oryza glaberrima
- Hordeum vulgare
- Brachypodium distachyon
- Zea mays
- Sorghum bicolor
- Setaria italica
- Musa acuminata
- Salvinella moellendorffii
- Physcomitrella patens
- Ostreococcus tauri
- Ostreococcus lucimarinus CCE9901
- Chlamydomonas reinhardtii
- Cyanidioschyzon merolae
- Encephalitozoon hellem ATCC 50504
- Encephalitozoon intestinalis ATCC 50506
- Encephalitozoon cuniculi GB M1
- Puccinia graminis
- Puccinia triticina
- Ustilago maydis
- Melassezia globosa CBS 7966
- Cryptococcus gattii WM276
- Cryptococcus neoformans var. neoformans JEC21
- Cryptococcus neoformans var. neoformans B 3501A
- Phanerochaete chrysosporium
- Schizophyllum commune H4 B
- Coprinopsis cinerea okayama7\_130
- Laccaria bicolor S238N H82
- Schizosaccharomyces japonicus yFS275
- Schizosaccharomyces pombe
- Clavospora lusitanae ATCC 42720
- Yarrowia lipolytica
- Candida tropicalis MYA 3404
- Candida dubliniensis CD36
- Lodderomyces elongisporus NRRL YB 4239
- Scheffersomyces stipitis CBS 6054
- Meyerozyma guilliermondii ATCC 6260
- Pichia guilliermondii
- Lachancea thermotolerans
- Kluyveromyces fragilis NRRL Y 1140
- Saccharomyces cerevisiae
- Zygosaccharomyces rouxii
- Komagataella pastoris GS115
- Vanderwaltozyma polyspora DSM 70294
- Torulopsis delbrueckii
- Candida glabrata CBS 138
- Tetrapispora phaffii CBS 4417
- Naumovozyma dairenensis CBS 421
- Naumovozyma castellii CBS 4309
- Eremothecium cymbalariae DBVPG\_7215
- Eremothecium gossypii
- Tuber melanosporum
- Zymoseptoria tritici
- Phaeosphaeria nodorum
- Leptosphaeria maculans
- Pyrenophora tritici repens Pt 1C BFP
- Pyrenophora teres f. teres 0 1
- Botryotinia fuckeliana
- Sclerotinia sclerotiorum
- Verticillium albo atrum VaMs.102
- Fusarium oxysporum
- Hypocrea virens
- Hypocrea jecorina
- Nectria haematococca
- Gibberella moniliformis
- Gibberella zeae PH 1
- Gibberella zeae
- Gaeumannomyces graminis
- Magnaporthe grisea
- Magnaporthe poae
- Magnaporthe oryzae
- Podospira anserina S mat
- Neurospora crassa
- Sordaria macrospora k hell
- Myceliophthora thermophila ATCC 42464
- Chaetomium globosum CBS 148.51
- Thielavia terrestris NRRL 8126
- Uncinocarpus reesii 1704
- Ajellomyces capsulatus Nam1
- Ajellomyces dermatitidis SLH14081
- Paracoccidioides sp. lutzi Fb01
- Coccidioides posadasii C735 delta SOWgp
- Coccidioides immitis RS
- Trichophyton rubrum CBS 118892
- Trichophyton verrucosum HKI 0517
- Arthroderma benhamiae CBS 112371
- Arthroderma gypseum CBS 118893
- Arthroderma otae CBS 113480
- Talaromyces stipitatus ATCC 10500
- Neosartorya fischeri
- Emericella nidulans
- Penicillium chrysogenum Wisconsin 54 1255
- Penicillium marneffei ATCC 18224
- Aspergillus clavatus
- Aspergillus flavus
- Aspergillus oryzae
- Aspergillus niger
- Aspergillus fumigatus
- Aspergillus terreus
- Monosiga brevicollis MX1
- Amphimedon queenslandica
- Trichoplax adhaerens
- Nematostella vectensis
- Hydra magnipapillata
- Schistosoma mansoni
- Trichinella spiralis
- Pristionchus pacificus
- Caenorhabditis brenneri
- Caenorhabditis briggsae
- Caenorhabditis remanei
- Caenorhabditis japonica
- Caenorhabditis elegans
- Ixodes scapularis
- Daphnia pulex
- Pediculus humanus
- Acyrtosiphon pisum
- Tribolium castaneum
- Nasonia vitripennis
- Apis mellifera
- Atta cephalotes
- Bombyx mori
- Danaus plexippus
- Heliconius melpomene
- Culex quinquefasciatus
- Aedes aegypti
- Anopheles gambiae
- Anopheles darlingi
- Drosophila virilis
- Drosophila grimshawi
- Drosophila willistoni
- Drosophila pseudoobscura
- Drosophila ananassae
- Drosophila melanogaster
- Drosophila yakuba
- Strongylocentrotus purpuratus
- Branchiostoma floridae
- Ciona intestinalis
- Ciona savignyi
- Petromyzon marinus
- Danio rerio
- Gadus morhua
- Oreochromis niloticus
- Takifugu rubripes
- Tetraodon nigroviridis
- Gasterosteus aculeatus
- Xiphophorus maculatus
- Oryzias latipes
- Latimeria chalumnae
- Xenopus (Silurana) tropicalis
- Pelodiscus sinensis
- Anolis carolinensis
- Taeniopygia guttata
- Gallus gallus
- Meleagris gallopavo
- Ornithorhynchus anatinus
- Monodelphis domestica
- Sarcophilus harrisii
- Macropus eugenii
- Dasyurus novemcinctus
- Loxodonta africana
- Echinops telitarii
- Procavia capensis
- Myotis lucifugus
- Pteropus vampyrus
- Sus scrofa
- Tursiops truncatus
- Bos taurus
- Equus caballus
- Felis catus
- Canis lupus familiaris
- Mustela putorius furo
- Alluropoda melanoleuca
- Cryptolestes cuniculus
- Cavia porcellus
- Ictidomys tridecemlineatus
- Dipodomys ordii
- Rattus norvegicus
- Mus musculus
- Tupaia belangeri
- Otolomus garrettii
- Microcebus murinus
- Tarsius syrichta
- Callithrix jacchus
- Macaca mulatta
- Nomascus leucogenys
- Pongo abelii
- Gorilla gorilla
- Pan troglodytes
- Homo sapiens
- Perkinsus marinus ATCC 50983
- Tetrahymena thermophila
- Paramecium tetraurelia strain d4 2
- Neospora caninum Liverpool
- Toxoplasma gondii
- Cryptosporidium muris RN66
- Cryptosporidium parvum Iowa II
- Cryptosporidium hominis TU502
- Theileria annulata strain Ankara
- Theileria parva strain Muguga
- Plasmodium falciparum
- Plasmodium knowlesi
- Plasmodium vivax
- Plasmodium chabaudi
- Plasmodium yoelii yoelii 17XNL
- Plasmodium berghei
- Phaeodactylum tricornutum
- Thalassiosira pseudonana
- Pythium ultimum
- Albugo liliaceae
- Hyaloperonospora arabidopsidis
- Phytophthora ramorum
- Phytophthora infestans
- Phytophthora sojae
- Trypanosoma brucei
- Trypanosoma cruzi strain CL Brener
- Leishmania braziliensis MHOM BR 75 M2904
- Leishmania mexicana MHOM GT 2001 U1103
- Leishmania major
- Leishmania donovani
- Leishmania infantum JPCM5
- Entamoeba histolytica
- Entamoeba dispar SAW760
- Dicystostellum discoideum
- Dicystostellum purpureum
- Trichomonas vaginalis G3
- Trichomonas vaginalis
- Naegleria gruberi
- Giardia lamblia ATCC 50803

- OG presence
- OG absence
- Inferred root

Dscore = 0.819  
Pvalue = 1.63e-04  
AdjPvalue = 1.94e-02

- Arabis thaliana
- Arabidopsis lyrata
- Brassica rapa
- Glycine max
- Populus trichocarpa
- Vitis vinifera
- Solanum tuberosum
- Solanum lycopersicum
- Oryza sativa Indica Group
- Oryza sativa Japonica Group
- Oryza brachyantha
- Oryza glaberrima
- Hordeum vulgare
- Brachypodium distachyon
- Zea mays
- Sorghum bicolor
- Setaria italica
- Musa acuminata
- Salvinella moellendorffii
- Physcomitrella patens
- Ostreococcus tauri
- Ostreococcus lucimarinus CCE9901
- Chlamydomonas reinhardtii
- Cyanidioschyzon merolae
- Encephalitozoon hellem ATCC 50504
- Encephalitozoon intestinalis ATCC 50506
- Encephalitozoon cuniculi GB M1
- Puccinia graminis
- Puccinia triticina
- Ustilago maydis
- Melassezia globosa CBS 7966
- Cryptococcus gattii WM276
- Cryptococcus neoformans var. neoformans JEC21
- Cryptococcus neoformans var. neoformans B 3501A
- Phanerochaete chrysosporium
- Schizophyllum commune H4 B
- Coprinopsis cinerea okayama7\_130
- Laccaria bicolor S238N H82
- Schizosaccharomyces japonicus yFS275
- Schizosaccharomyces pombe
- Clavospora lusitanae ATCC 42720
- Yarrowia lipolytica
- Candida tropicalis MYA 3404
- Candida dubliniensis CD36
- Lodderomyces elongisporus NRRL YB 4239
- Scheffersomyces stipitis CBS 6054
- Meyerozyma guilliermondii ATCC 6260
- Pichia guilliermondii
- Lachancea thermotolerans
- Kluyveromyces fragilis NRRL Y 1140
- Saccharomyces cerevisiae
- Zygosaccharomyces rouxii
- Komagataella pastoris GS115
- Vanderwaltozyma polyspora DSM 70294
- Torulopsis delbrueckii
- Candida glabrata CBS 138
- Tetrapispora phaffii CBS 4417
- Naumovozyma dairensis CBS 421
- Naumovozyma castellii CBS 4309
- Eremothecium cymbalariae DBVPG\_7215
- Eremothecium gossypii
- Tuber melanosporum
- Zymoseptoria tritici
- Phaeosphaeria nodorum
- Leptosphaeria maculans
- Pyrenophora tritici repens Pt 1C BFP
- Pyrenophora teres f. teres 0 1
- Botryotinia fuckeliana
- Sclerotinia sclerotiorum
- Verticillium albo atrum VaMs.102
- Fusarium oxysporum
- Hypocrea virens
- Hypocrea jecorina
- Nectria haematococca
- Gibberella moniliformis
- Gibberella zeae PH 1
- Gibberella zeae
- Gaeumannomyces graminis
- Magnaporthe grisea
- Magnaporthe poae
- Magnaporthe oryzae
- Podospira anserina S mat
- Neurospora crassa
- Sordaria macrospora k hell
- Myceliophthora thermophila ATCC 42464
- Chaetomium globosum CBS 148.51
- Thielavia terrestris NRRL 8126
- Uncinocarpus reesii 1704
- Ajellomyces capsulatus Nam1
- Ajellomyces dermatitidis SLH14081
- Paracoccidioides sp. lutzi Fb01
- Coccidioides posadasii C735 delta SOWgp
- Coccidioides immitis RS
- Trichophyton rubrum CBS 118892
- Trichophyton verrucosum HKI 0517
- Arthroderma benhamiae CBS 112371
- Arthroderma gypseum CBS 118893
- Arthroderma otae CBS 113480
- Talaromyces stipitatus ATCC 10500
- Neosartorya fischeri
- Emericella nidulans
- Penicillium chrysogenum Wisconsin 54 1255
- Penicillium marneffei ATCC 18224
- Aspergillus clavatus
- Aspergillus flavus
- Aspergillus oryzae
- Aspergillus niger
- Aspergillus fumigatus
- Aspergillus terreus
- Monosiga brevicollis MX1
- Amphimedon queenslandica
- Trichoplax adhaerens
- Nematostella vectensis
- Hydra magnipapillata
- Schistosoma mansoni
- Trichiella spiralis
- Pristionchus pacificus
- Caenorhabditis brenneri
- Caenorhabditis briggsae
- Caenorhabditis remanei
- Caenorhabditis japonica
- Caenorhabditis elegans
- Ixodes scapularis
- Daphnia pulex
- Pediculus humanus
- Acyrtosiphon pisum
- Tribolium castaneum
- Nasonia vitripennis
- Apis mellifera
- Atta cephalotes
- Bombyx mori
- Danaus plexippus
- Heliconius melpomene
- Culex quinquefasciatus
- Aedes aegypti
- Anopheles gambiae
- Anopheles darlingi
- Drosophila virilis
- Drosophila grimshawi
- Drosophila willistoni
- Drosophila pseudoobscura
- Drosophila ananassae
- Drosophila melanogaster
- Drosophila yakuba
- Strongylocentrotus purpuratus
- Branchiostoma floridae
- Ciona intestinalis
- Ciona savignyi
- Petromyzon marinus
- Danio rerio
- Gadus morhua
- Oreochromis niloticus
- Takifugu rubripes
- Tetraodon nigroviridis
- Gasterosteus aculeatus
- Xiphophorus maculatus
- Oryzias latipes
- Latimeria chalumnae
- Xenopus (Silurana) tropicalis
- Pelodiscus sinensis
- Anolis carolinensis
- Taeniopygia guttata
- Gallus gallus
- Meleagris gallopavo
- Ornithorhynchus anatinus
- Monodelphis domestica
- Sarcophilus harrisii
- Macropus eugenii
- Dasyurus novemcinctus
- Loxodonta africana
- Echinops telillari
- Procavia capensis
- Myotis lucifugus
- Pteropus vampyrus
- Sus scrofa
- Tursiops truncatus
- Bos taurus
- Equus caballus
- Felis catus
- Canis lupus familiaris
- Mustela putorius furo
- Alluropoda melanoleuca
- Cryptolepis cuniculus
- Cavia porcellus
- Ictidomys tridecemlineatus
- Dipodomys ordii
- Rattus norvegicus
- Mus musculus
- Tupaia belangeri
- Urolemur garnettii
- Microcebus murinus
- Tarsius syrichta
- Callithrix jacchus
- Macaca mulatta
- Nomascus leucogenys
- Pongo abelii
- Gorilla gorilla
- Pan troglodytes
- Homo sapiens
- Perkinsus marinus ATCC 50983
- Tetrahymena thermophila
- Paramecium tetraurelia strain d4 2
- Neospora caninum Liverpool
- Toxoplasma gondii
- Cryptosporidium muris RN66
- Cryptosporidium parvum Iowa II
- Cryptosporidium hominis TU502
- Theileria annulata strain Ankara
- Theileria parva strain Muguga
- Plasmodium falciparum
- Plasmodium knowlesi
- Plasmodium vivax
- Plasmodium chabaudi
- Plasmodium yoelii yoelii 17XNL
- Plasmodium berghei
- Phaeodactylum tricornutum
- Thalassiosira pseudonana
- Pythium ultimum
- Albugo liliaceae
- Hyaloperonospora arabidopsidis
- Phytophthora ramorum
- Phytophthora infestans
- Phytophthora sojae
- Trypanosoma brucei
- Trypanosoma cruzi strain CL Brener
- Leishmania braziliensis MHOM BR 75 M2904
- Leishmania mexicana MHOM GT 2001 U1103
- Leishmania major
- Leishmania donovani
- Leishmania infantum JPCM5
- Entamoeba histolytica
- Entamoeba dispar SAW760
- Dicystostellum discoideum
- Dicystostellum purpureum
- Trichomonas vaginalis G3
- Trichomonas vaginalis
- Naegleria gruberi
- Giardia lamblia ATCC 50803

- OG presence
- OG absence
- Inferred root

Dscore = 0.952  
Pvalue = 1.31e-05  
AdjPvalue = 1.56e-03

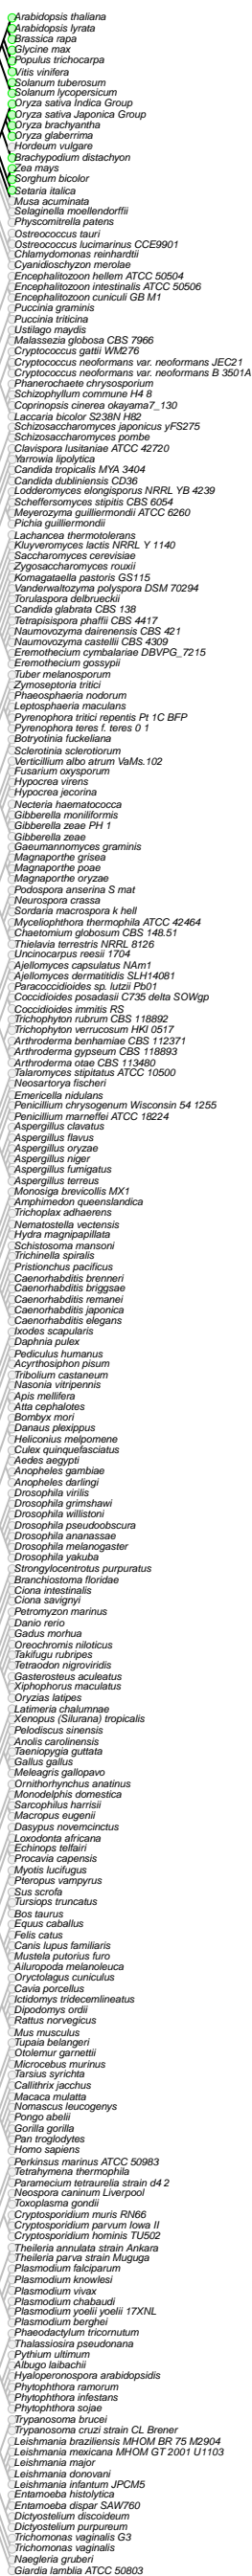

Dscore = 0.984  
 Pvalue = 4.85e-06  
 AdjPvalue = 5.77e-04

- Arabis thaliana
- Arabidopsis lyrata
- Brassica rapa
- Glycine max
- Populus trichocarpa
- Vitis vinifera
- Solanum tuberosum
- Solanum lycopersicum
- Oryza sativa Indica Group
- Oryza sativa Japonica Group
- Oryza brachyantha
- Oryza glaberrima
- Hordeum vulgare
- Brachypodium distachyon
- Zea mays
- Sorghum bicolor
- Setaria italica
- Musa acuminata
- Selaginella moellendorffii
- Physcomitrella patens
- Ostreococcus tauri
- Ostreococcus lucimarinus CCE9901
- Chlamydomonas reinhardtii
- Cyanidioschyzon merolae
- Encephalitozoon hellem ATCC 50504
- Encephalitozoon intestinalis ATCC 50506
- Encephalitozoon cuniculi GB M1
- Puccinia graminis
- Puccinia triticina
- Ustilago maydis
- Melassezia globosa CBS 7966
- Cryptococcus gattii WM276
- Cryptococcus neoformans var. neoformans JEC21
- Cryptococcus neoformans var. neoformans B 3501A
- Phanerochaete chrysosporium
- Schizophyllum commune H4 B
- Coprinopsis cinerea okayama7\_130
- Laccaria bicolor S238N H82
- Schizosaccharomyces japonicus yFS275
- Schizosaccharomyces pombe
- Clavospora lusitanae ATCC 42720
- Yarrowia lipolytica
- Candida tropicalis MYA 3404
- Candida dubliniensis CD36
- Lodderomyces elongisporus NRRL YB 4239
- Scheffersomyces stipitis CBS 6054
- Meyerozyma guilliermondii ATCC 6260
- Pichia guilliermondii
- Lachancea thermotolerans
- Kluyveromyces fragilis NRRL Y 1140
- Saccharomyces cerevisiae
- Zygosaccharomyces rouxii
- Komagataella pastoris GS115
- Vanderwaltozyma polyspora DSM 70294
- Torulopsis delbrueckii
- Candida glabrata CBS 138
- Tetrapispora phaffii CBS 4417
- Naumovozyma dairensis CBS 421
- Naumovozyma castellii CBS 4309
- Eremothecium cymbalariae DBVPG\_7215
- Eremothecium gossypii
- Tuber melanosporum
- Zymoseptoria tritici
- Phaeosphaeria nodorum
- Leptosphaeria maculans
- Pyrenophora tritici repens Pt 1C BFP
- Pyrenophora teres f. teres 0 1
- Botryotinia fuckeliana
- Sclerotinia sclerotiorum
- Verticillium albo atrum VaMs.102
- Fusarium oxysporum
- Hypocrea virens
- Hypocrea jecorina
- Nectria haematococca
- Gibberella moniliformis
- Gibberella zeae PH 1
- Gibberella zeae
- Gaeumannomyces graminis
- Magnaporthe grisea
- Magnaporthe poae
- Magnaporthe oryzae
- Podospira anserina S mat
- Neurospora crassa
- Sordaria macrospora k hell
- Myceliophthora thermophila ATCC 42464
- Chaetomium globosum CBS 148.51
- Thielavia terrestris NRRL 8126
- Uncinocarpus reesii 1704
- Ajellomyces capsulatus Nam1
- Ajellomyces dermatitidis SLH14081
- Paracoccidioides sp. lutzi Fb01
- Coccidioides posadasii C735 delta SOWgp
- Coccidioides immitis RS
- Trichophyton rubrum CBS 118892
- Trichophyton verrucosum HKI 0517
- Arthroderma benhamiae CBS 112371
- Arthroderma gypseum CBS 118893
- Arthroderma otae CBS 113480
- Talaromyces stipitatus ATCC 10500
- Neosartorya fischeri
- Emericella nidulans
- Penicillium chrysogenum Wisconsin 54 1255
- Penicillium marneffei ATCC 18224
- Aspergillus clavatus
- Aspergillus flavus
- Aspergillus oryzae
- Aspergillus niger
- Aspergillus fumigatus
- Aspergillus terreus
- Monosiga brevicollis MX1
- Amphimedon queenslandica
- Trichoplax adhaerens
- Nematostella vectensis
- Hydra magnipapillata
- Schistosoma mansoni
- Trichinella spiralis
- Pristionchus pacificus
- Caenorhabditis breneri
- Caenorhabditis briggsae
- Caenorhabditis remanei
- Caenorhabditis japonica
- Caenorhabditis elegans
- Ixodes scapularis
- Daphnia pulex
- Pediculus humanus
- Acyrtosiphon pisum
- Tribolium castaneum
- Nasonia vitripennis
- Apis mellifera
- Atta cephalotes
- Bombyx mori
- Danaus plexippus
- Heliconia melpomene
- Culex quinquefasciatus
- Aedes aegypti
- Anopheles gambiae
- Anopheles darlingi
- Drosophila virilis
- Drosophila grimshawi
- Drosophila willistoni
- Drosophila pseudoobscura
- Drosophila ananassae
- Drosophila melanogaster
- Drosophila yakuba
- Strongylocentrotus purpuratus
- Branchiostoma floridae
- Ciona intestinalis
- Ciona savignyi
- Petromyzon marinus
- Danio rerio
- Gadus morhua
- Oreochromis niloticus
- Takifugu rubripes
- Tetraodon nigroviridis
- Gasterosteus aculeatus
- Xiphophorus maculatus
- Oryzias latipes
- Latimeria chalumnae
- Xenopus (Silurana) tropicalis
- Pelodiscus sinensis
- Anolis carolinensis
- Taeniopygia guttata
- Gallus gallus
- Meleagris gallopavo
- Ornithorhynchus anatinus
- Monodelphis domestica
- Sarcophilus harrisii
- Macropus eugenii
- Dasyurus novemcinctus
- Loxodonta africana
- Echinops telillari
- Procavia capensis
- Myotis lucifugus
- Pteropus vampyrus
- Sus scrofa
- Tursiops truncatus
- Bos taurus
- Equus caballus
- Felis catus
- Canis lupus familiaris
- Mustela putorius furo
- Alluropoda melanoleuca
- Cryptolestes cuniculus
- Cavia porcellus
- Ictidomys tridecemlineatus
- Dipodomys ordii
- Rattus norvegicus
- Mus musculus
- Tupaia belangeri
- Otolomus garretti
- Microcebus murinus
- Tarsius syrichta
- Callithrix jacchus
- Macaca mulatta
- Nomascus leucogenys
- Pongo abelii
- Gorilla gorilla
- Pan troglodytes
- Homo sapiens
- Perkinsus marinus ATCC 50983
- Tetrahymena thermophila
- Paramecium tetraurelia strain d4 2
- Neospora caninum Liverpool
- Toxoplasma gondii
- Cryptosporidium muris RN66
- Cryptosporidium parvum Iowa II
- Cryptosporidium hominis TU502
- Theileria annulata strain Ankara
- Theileria parva strain Muguga
- Plasmodium falciparum
- Plasmodium knowlesi
- Plasmodium vivax
- Plasmodium chabaudi
- Plasmodium yoelii yoelii 17XNL
- Plasmodium berghei
- Phaeodactylum tricornutum
- Thalassiosira pseudonana
- Pythium ultimum
- Albugo liliaceae
- Hyaloperonospora arabidopsidis
- Phytophthora ramorum
- Phytophthora infestans
- Phytophthora sojae
- Trypanosoma brucei
- Trypanosoma cruzi strain CL Brener
- Leishmania braziliensis MHOM BR 75 M2904
- Leishmania mexicana MHOM GT 2001 U1103
- Leishmania major
- Leishmania donovani
- Leishmania infantum JPCM5
- Entamoeba histolytica
- Entamoeba dispar SAW760
- Dicystostellum discoideum
- Dicystostellum purpureum
- Trichomonas vaginalis G3
- Trichomonas vaginalis
- Naegleria gruberi
- Giardia lamblia ATCC 50803

- OG presence
- OG absence
- Inferred root

Dscore = 0.852  
Pvalue = 1.34e-04  
AdjPvalue = 1.60e-02

- Arabis thaliana
- Arabidopsis lyrata
- Brassica rapa
- Glycine max
- Populus trichocarpa
- Vitis vinifera
- Solanum tuberosum
- Solanum lycopersicum
- Oryza sativa Indica Group
- Oryza sativa Japonica Group
- Oryza brachyantha
- Oryza glaberrima
- Hordeum vulgare
- Brachypodium distachyon
- Zea mays
- Sorghum bicolor
- Setaria italica
- Musa acuminata
- Selaginella moellendorffii
- Physcomitrella patens
- Ostreococcus tauri
- Ostreococcus lucimarinus CCE9901
- Chlamydomonas reinhardtii
- Cyanidioschyzon merolae
- Encephalitozoon hellem ATCC 50504
- Encephalitozoon intestinalis ATCC 50506
- Encephalitozoon cuniculi GB M1
- Puccinia graminis
- Puccinia triticina
- Ustilago maydis
- Melassezia globosa CBS 7966
- Cryptococcus gattii WM276
- Cryptococcus neoformans var. neoformans JEC21
- Cryptococcus neoformans var. neoformans B 3501A
- Phanerochaete chrysosporium
- Schizophyllum commune H4 B
- Coprinopsis cinerea okayama7\_130
- Laccaria bicolor S238N H82
- Schizosaccharomyces japonicus yFS275
- Schizosaccharomyces pombe
- Clavospora lusitanae ATCC 42720
- Yarrowia lipolytica
- Candida tropicalis MYA 3404
- Candida dubliniensis CD36
- Lodderomyces elongisporus NRRL YB 4239
- Scheffersomyces stipitis CBS 6054
- Meyerozyma guilliermondii ATCC 6260
- Pichia guilliermondii
- Lachancea thermotolerans
- Kluyveromyces fragilis NRRL Y 1140
- Saccharomyces cerevisiae
- Zygosaccharomyces rouxii
- Komagataella pastoris GS115
- Vanderwaltozyma polyspora DSM 70294
- Torulopsis delbrueckii
- Candida glabrata CBS 138
- Tetrapispora phaffii CBS 4417
- Naumovozyma dairensis CBS 421
- Naumovozyma castellii CBS 4309
- Eremothecium cymbalariae DBVPG\_7215
- Eremothecium gossypii
- Tuber melanosporum
- Zymoseptoria tritici
- Phaeosphaeria nodorum
- Leptosphaeria maculans
- Pyrenophora tritici repens Pt 1C BFP
- Pyrenophora teres f. teres 0 1
- Botryotinia fuckeliana
- Sclerotinia sclerotiorum
- Verticillium albo atrum VaMs.102
- Fusarium oxysporum
- Hypocrea virens
- Hypocrea jecorina
- Nectria haematococca
- Gibberella moniliformis
- Gibberella zeae PH 1
- Gibberella zeae
- Gaeumannomyces graminis
- Magnaporthe grisea
- Magnaporthe poae
- Magnaporthe oryzae
- Podospira anserina S mat
- Neurospora crassa
- Sordaria macrospora k hell
- Myceliophthora thermophila ATCC 42464
- Chaetomium globosum CBS 148.51
- Thielavia terrestris NRRL 8126
- Uncinocarpus reesii 1704
- Ajellomyces capsulatus Nam1
- Ajellomyces dermatitidis SLH14081
- Paracoccidioides sp. lutzi Fb01
- Coccidioides posadasii C735 delta SOWgp
- Coccidioides immitis RS
- Trichophyton rubrum CBS 118892
- Trichophyton verrucosum HKI 0517
- Arthroderma benhamiae CBS 112371
- Arthroderma gypseum CBS 118893
- Arthroderma otae CBS 113480
- Talaromyces stipitatus ATCC 10500
- Neosartorya fischeri
- Emericella nidulans
- Penicillium chrysogenum Wisconsin 54 1255
- Penicillium marneffei ATCC 18224
- Aspergillus clavatus
- Aspergillus flavus
- Aspergillus oryzae
- Aspergillus niger
- Aspergillus fumigatus
- Aspergillus terreus
- Monosiga brevicollis MX1
- Amphimedon queenslandica
- Trichoplax adhaerens
- Nematostella vectensis
- Hydra magnipapillata
- Schistosoma mansoni
- Trichiella spiralis
- Pristionchus pacificus
- Caenorhabditis brenneri
- Caenorhabditis briggsae
- Caenorhabditis remanei
- Caenorhabditis japonica
- Caenorhabditis elegans
- Ixodes scapularis
- Daphnia pulex
- Pediculus humanus
- Acyrtosiphon pisum
- Tribolium castaneum
- Nasonia vitripennis
- Apis mellifera
- Atta cephalotes
- Bombyx mori
- Danaus plexippus
- Heliconius melpomene
- Culex quinquefasciatus
- Aedes aegypti
- Anopheles gambiae
- Anopheles darlingi
- Drosophila virilis
- Drosophila grimshawi
- Drosophila willistoni
- Drosophila pseudoobscura
- Drosophila ananassae
- Drosophila melanogaster
- Drosophila yakuba
- Strongylocentrotus purpuratus
- Branchiostoma floridae
- Ciona intestinalis
- Ciona savignyi
- Petromyzon marinus
- Danio rerio
- Gadus morhua
- Oreochromis niloticus
- Takifugu rubripes
- Tetraodon nigroviridis
- Gasterosteus aculeatus
- Xiphophorus maculatus
- Oryzias latipes
- Latimeria chalumnae
- Xenopus (Silurana) tropicalis
- Pelodiscus sinensis
- Anolis carolinensis
- Taeniopygia guttata
- Gallus gallus
- Meleagris gallopavo
- Ornithorhynchus anatinus
- Monodelphis domestica
- Sarcophilus harrisii
- Macropus eugenii
- Dasyurus novemcinctus
- Loxodonta africana
- Echinosorex tillarii
- Procavia capensis
- Myotis lucifugus
- Pteropus vampyrus
- Sus scrofa
- Tursiops truncatus
- Bos taurus
- Equus caballus
- Felis catus
- Canis lupus familiaris
- Mustela putorius furo
- Alluropoda melanoleuca
- Cryptolestes cuniculus
- Cavia porcellus
- Ictidomys tridecemlineatus
- Dipodomys ordii
- Rattus norvegicus
- Mus musculus
- Tupaia belangeri
- Otolomus garretti
- Microcebus murinus
- Tarsius syrichta
- Callithrix jacchus
- Macaca mulatta
- Nomascus leucogenys
- Pongo abelii
- Gorilla gorilla
- Pan troglodytes
- Homo sapiens
- Perkinsus marinus ATCC 50983
- Tetrahymena thermophila
- Paramecium tetraurelia strain d4 2
- Neospora caninum Liverpool
- Toxoplasma gondii
- Cryptosporidium muris RN66
- Cryptosporidium parvum Iowa II
- Cryptosporidium hominis TU502
- Theileria annulata strain Ankara
- Theileria parva strain Muguga
- Plasmodium falciparum
- Plasmodium knowlesi
- Plasmodium vivax
- Plasmodium chabaudi
- Plasmodium yoelii yoelii 17XNL
- Plasmodium berghei
- Phaeodactylum tricornutum
- Thalassiosira pseudonana
- Pythium ultimum
- Albugo liliaceae
- Hyaloperonospora arabidopsidis
- Phytophthora ramorum
- Phytophthora infestans
- Phytophthora sojae
- Trypanosoma brucei
- Trypanosoma cruzi strain CL Brener
- Leishmania braziliensis MHOM BR 75 M2904
- Leishmania mexicana MHOM GT 2001 U1103
- Leishmania major
- Leishmania donovani
- Leishmania infantum JPCM5
- Entamoeba histolytica
- Entamoeba dispar SAW760
- Dicystostellum discoideum
- Dicystostellum purpureum
- Trichomonas vaginalis G3
- Trichomonas vaginalis
- Naegleria gruberi
- Giardia lamblia ATCC 50803

- OG presence
- OG absence
- Inferred root

Dscore = 1

Pvalue = 1.27e-05

AdjPvalue = 1.51e-03



- Arabidopsis thaliana
- Arabidopsis lyrata
- ◆ Brassica rapa
- Glycine max
- Populus trichocarpa
- Vitis vinifera
- Solanum tuberosum
- Solanum lycopersicum
- Oryza sativa Indica Group
- Oryza sativa Japonica Group
- Oryza brachyantha
- Oryza glaberrima
- Hordeum vulgare
- Brachypodium distachyon
- Zea mays
- Sorghum bicolor
- Setaria italica
- Musa acuminata
- Selaginella moellendorffii
- Physcomitrella patens
- Ostreococcus tauri
- Ostreococcus lucimarinus CCE9901
- Chlamydomonas reinhardtii
- Cyanidioschyzon merolae
- Encephalitozoon hellem ATCC 50504
- Encephalitozoon intestinalis ATCC 50506
- Encephalitozoon cuniculi GB M1
- Puccinia graminis
- Puccinia triticina
- Ustilago maydis
- Melassezia globosa CBS 7966
- Cryptococcus gattii WM276
- Cryptococcus neoformans var. neoformans JEC21
- Cryptococcus neoformans var. neoformans B 3501A
- Phanerochaete chrysosporium
- Schizophyllum commune H4 B
- Coprinopsis cinerea okayama7\_130
- Laccaria bicolor S238N H82
- Schizosaccharomyces japonicus yFS275
- Schizosaccharomyces pombe
- Clavospora lusitaniae ATCC 42720
- Yarrowia lipolytica
- Candida tropicalis MYA 3404
- Candida dubliniensis CD36
- Lodderomyces elongisporus NRRL YB 4239
- Scheffersomyces stipitis CBS 6054
- Meyeromyces guilliermondii ATCC 6260
- Pichia guilliermondii
- Lachancea thermotolerans
- Kluyveromyces fragilis NRRL Y 1140
- Saccharomyces cerevisiae
- Zygosaccharomyces rouxii
- Komagataella pastoris GS115
- Vanderwaltozyma polyspora DSM 70294
- Torulaspora delbrueckii
- Candida glabrata CBS 138
- Tetrapisispora phaffii CBS 4417
- Naumovozyma dairenensis CBS 421
- Naumovozyma castellii CBS 4309
- Eremothecium cymbalariae DBVPG\_7215
- Eremothecium gossypii
- Tuber melanosporum
- Zymoseptoria tritici
- Phaeosphaeria nodorum
- Leptosphaeria maculans
- Pyrenophora tritici repens Pt 1C BFP
- Pyrenophora teres f. teres 0 1
- Botryotinia fuckeliana
- Sclerotinia sclerotiorum
- Verticillium albo atrum VaMs.102
- Fusarium oxysporum
- Hypocrea virens
- Hypocrea jecorina
- Nectria haematococca
- Gibberella moniliformis
- Gibberella zeae PH 1
- Gibberella zeae
- Gaeumannomyces graminis
- Magnaporthe grisea
- Magnaporthe poae
- Magnaporthe oryzae
- Podospora anserina S mat
- Neurospora crassa
- Sordaria macrospora k hell
- Myceliophthora thermophila ATCC 42464
- Chaetomium globosum CBS 148.51
- Thielavia terrestris NRRL 8126
- Uncinocarpus reesii 1704
- Ajellomyces capsulatus Nam1
- Ajellomyces dermatitidis SLH14081
- Paracoccidioides sp. lutzi Fb01
- Coccidioides posadasii C735 delta SOWgp
- Coccidioides immitis RS
- Trichophyton rubrum CBS 118892
- Trichophyton verrucosum HKI 0517
- Arthroderma benhamiae CBS 112371
- Arthroderma gypseum CBS 118893
- Arthroderma otae CBS 113480
- Talaromyces stipitatus ATCC 10500
- Neosartorya fischeri
- Emericella nidulans
- Penicillium chrysogenum Wisconsin 54 1255
- Penicillium marneffei ATCC 18224
- Aspergillus clavatus
- Aspergillus flavus
- Aspergillus oryzae
- Aspergillus niger
- Aspergillus fumigatus
- Aspergillus terreus
- Monosiga brevicollis MX1
- Amphimedon queenslandica
- Trichoplax adhaerens
- Nematostella vectensis
- Hydra magnipapillata
- Schistosoma mansoni
- Trichiella spiralis
- Pristionchus pacificus
- Caenorhabditis brenneri
- Caenorhabditis briggsae
- Caenorhabditis remanei
- Caenorhabditis japonica
- Caenorhabditis elegans
- Ixodes scapularis
- Daphnia pulex
- Pediculus humanus
- Acyrthosiphon pisum
- Tribolium castaneum
- Nasonia vitripennis
- Apis mellifera
- Atta cephalotes
- Bombyx mori
- Danaus plexippus
- Heliconius melpomene
- Culex quinquefasciatus
- Aedes aegypti
- Anopheles gambiae
- Anopheles darlingi
- Drosophila virilis
- Drosophila grimshawi
- Drosophila willistoni
- Drosophila pseudoobscura
- Drosophila ananassae
- Drosophila melanogaster
- Drosophila yakuba
- Strongylocentrotus purpuratus
- Branchiostoma floridae
- Ciona intestinalis
- Ciona savignyi
- Petromyzon marinus
- Danio rerio
- Gadus morhua
- Oreochromis niloticus
- Takifugu rubripes
- Tetraodon nigroviridis
- Gasterosteus aculeatus
- Xiphophorus maculatus
- Oryzias latipes
- Latimeria chalumnae
- Xenopus (Silurana) tropicalis
- Pelodiscus sinensis
- Anolis carolinensis
- Taeniopygia guttata
- Gallus gallus
- Meleagris gallopavo
- Ornithorhynchus anatinus
- Monodelphis domestica
- Sarcophilus harrisii
- Macropus eugenii
- Dasyurus novemcinctus
- Loxodonta africana
- Echinops telfairii
- Procavia capensis
- Myotis lucifugus
- Pteropus vampyrus
- Sus scrofa
- Tursiops truncatus
- Bos taurus
- Equus caballus
- Felis catus
- Canis lupus familiaris
- Mustela putorius furo
- Alluropoda melanoleuca
- Cryptolestes cucullatus
- Cavia porcellus
- Ictidomys tridecemlineatus
- Dipodomys ordii
- Rattus norvegicus
- Mus musculus
- Tupaia belangeri
- Otolomus garrettii
- Microcebus murinus
- Tarsius syrichta
- Callithrix jacchus
- Macaca mulatta
- Nomascus leucogenys
- Pongo abelii
- Gorilla gorilla
- Pan troglodytes
- Homo sapiens
- Perkinus marinus ATCC 50983
- Tetrahymena thermophila
- Paramecium tetraurelia strain d4 2
- Neospora caninum Liverpool
- Toxoplasma gondii
- Cryptosporidium muris RN66
- Cryptosporidium parvum Iowa II
- Cryptosporidium hominis TU502
- Theileria annulata strain Ankara
- Theileria parva strain Muguga
- Plasmodium falciparum
- Plasmodium knowlesi
- Plasmodium vivax
- Plasmodium chabaudi
- Plasmodium yoelii yoelii 17XNL
- Plasmodium berghei
- Phaeodactylum tricornutum
- Thalassiosira pseudonana
- Pythium ultimum
- Albugo liliaceae
- Hyaloperonospora arabidopsidis
- Phytophthora ramorum
- Phytophthora infestans
- Phytophthora sojae
- Trypanosoma brucei
- Trypanosoma cruzi strain CL Brener
- Leishmania braziliensis MHOM BR 75 M2904
- Leishmania mexicana MHOM GT 2001 U1103
- Leishmania major
- Leishmania donovani
- Leishmania infantum JPCM5
- Entamoeba histolytica
- Entamoeba dispar SAW760
- Dictyostellium discoideum
- Dictyostellium purpureum
- Trichomonas vaginalis G3
- Trichomonas vaginalis
- Naegleria gruberi
- Giardia lamblia ATCC 50803

- OG presence
- OG absence
- ◆ Inferred root

Dscore = 0.788  
Pvalue = 2.13e-05  
AdjPvalue = 2.53e-03

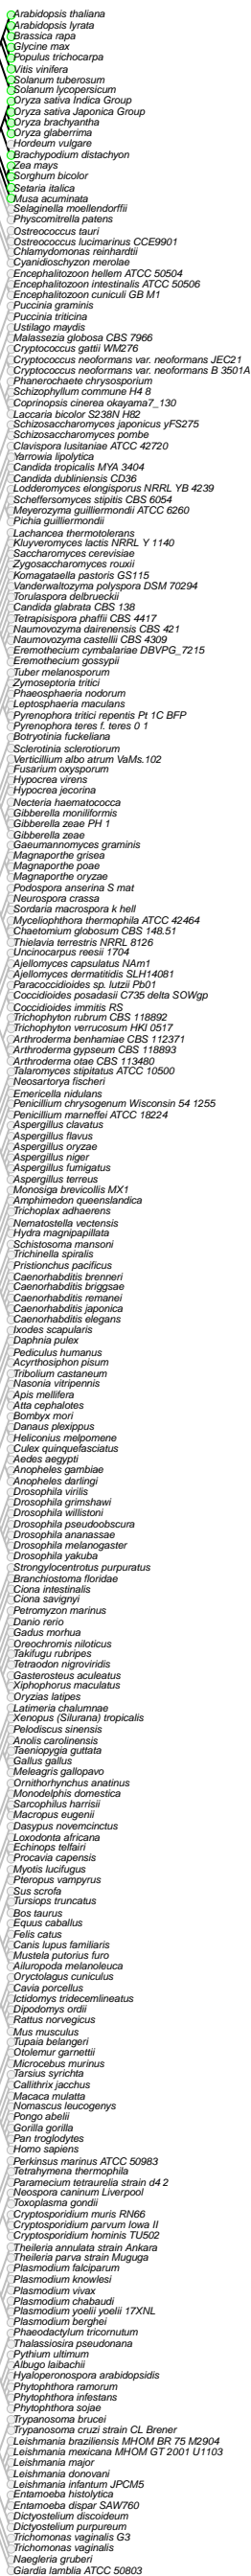

● OG presence  
 ○ OG absence  
 ◆ Inferred root

Dscore = 0.992  
 Pvalue = 4.34e-06  
 AdjPvalue = 5.16e-04

- Arabis thaliana
- Arabis lyrata
- Brassica rapa
- Glycine max
- Populus trichocarpa
- Vitis vinifera
- Solanum tuberosum
- Solanum lycopersicum
- Oryza sativa Indica Group
- Oryza sativa Japonica Group
- Oryza brachyantha
- Oryza glaberrima
- Hordeum vulgare
- Brachypodium distachyon
- Zea mays
- Sorghum bicolor
- Setaria italica
- Musa acuminata
- Selaginella moellendorffii
- Physcomitrella patens
- Ostreococcus tauri
- Ostreococcus lucimarinus CCE9901
- Chlamydomonas reinhardtii
- Cyanidioschyzon merolae
- Encephalitozoon hellem ATCC 50504
- Encephalitozoon intestinalis ATCC 50506
- Encephalitozoon cuniculi GB M1
- Puccinia graminis
- Puccinia triticina
- Ustilago maydis
- Melassezia globosa CBS 7966
- Cryptococcus gattii WM276
- Cryptococcus neoformans var. neoformans JEC21
- Cryptococcus neoformans var. neoformans B 3501A
- Phanerochaete chrysosporium
- Schizophyllum commune H4 B
- Coprinopsis cinerea okayama7\_130
- Laccaria bicolor S238N H82
- Schizosaccharomyces japonicus yFS275
- Schizosaccharomyces pombe
- Clavospora lusitanae ATCC 42720
- Yarrowia lipolytica
- Candida tropicalis MYA 3404
- Candida dubliniensis CD36
- Lodderomyces elongisporus NRRL YB 4239
- Scheffersomyces stipitis CBS 6054
- Meyerozyma guilliermondii ATCC 6260
- Pichia guilliermondii
- Lachancea thermotolerans
- Kluyveromyces fragilis NRRL Y 1140
- Saccharomyces cerevisiae
- Zygosaccharomyces rouxii
- Komagataella pastoris GS115
- Vanderwaltozyma polyspora DSM 70294
- Torulopsis delbrueckii
- Candida glabrata CBS 138
- Tetrapispora phaffii CBS 4417
- Naumovozyma dairenensis CBS 421
- Naumovozyma castellii CBS 4309
- Eremothecium cymbalariae DBVPG\_7215
- Eremothecium gossypii
- Tuber melanosporum
- Zymoseptoria tritici
- Phaeosphaeria nodorum
- Leptosphaeria maculans
- Pyrenophora tritici repens Pt 1C BFP
- Pyrenophora teres f. teres 0 1
- Botryotinia fuckeliana
- Sclerotinia sclerotiorum
- Verticillium albo atrum VaMs.102
- Fusarium oxysporum
- Hypocrea virens
- Hypocrea jecorina
- Nectria haematococca
- Gibberella moniliformis
- Gibberella zeae PH 1
- Gibberella zeae
- Gaeumannomyces graminis
- Magnaporthe grisea
- Magnaporthe poae
- Magnaporthe oryzae
- Podospira anserina S mat
- Neurospora crassa
- Sordaria macrospora k hell
- Myceliophthora thermophila ATCC 42464
- Chaetomium globosum CBS 148.51
- Thielavia terrestris NRRL 8126
- Uncinocarpus reesii 1704
- Ajellomyces capsulatus Nam1
- Ajellomyces dermatitidis SLH14081
- Paracoccidioides sp. lutzi Fb01
- Coccidioides posadasii C735 delta SOWgp
- Coccidioides immitis RS
- Trichophyton rubrum CBS 118892
- Trichophyton verrucosum HKI 0517
- Arthroderma benhamiae CBS 112371
- Arthroderma gypseum CBS 118893
- Arthroderma otae CBS 113480
- Talaromyces stipitatus ATCC 10500
- Neosartorya fischeri
- Emericella nidulans
- Penicillium chrysogenum Wisconsin 54 1255
- Penicillium marneffei ATCC 18224
- Aspergillus clavatus
- Aspergillus flavus
- Aspergillus oryzae
- Aspergillus niger
- Aspergillus fumigatus
- Aspergillus terreus
- Monosiga brevicollis MX1
- Amphimedon queenslandica
- Trichoplax adhaerens
- Nematostella vectensis
- Hydra magnipapillata
- Schistosoma mansoni
- Trichiella spiralis
- Pristionchus pacificus
- Caenorhabditis brenneri
- Caenorhabditis briggsae
- Caenorhabditis remanei
- Caenorhabditis japonica
- Caenorhabditis elegans
- Ixodes scapularis
- Daphnia pulex
- Pediculus humanus
- Acyrtosiphon pisum
- Tribolium castaneum
- Nasonia vitripennis
- Apis mellifera
- Atta cephalotes
- Bombyx mori
- Danaus plexippus
- Heliconius melpomene
- Culex quinquefasciatus
- Aedes aegypti
- Anopheles gambiae
- Anopheles darlingi
- Drosophila virilis
- Drosophila grimshawi
- Drosophila willistoni
- Drosophila pseudoobscura
- Drosophila ananassae
- Drosophila melanogaster
- Drosophila yakuba
- Strongylocentrotus purpuratus
- Branchiostoma floridae
- Ciona intestinalis
- Ciona savignyi
- Petromyzon marinus
- Danio rerio
- Gadus morhua
- Oreochromis niloticus
- Takifugu rubripes
- Tetraodon nigroviridis
- Gasterosteus aculeatus
- Xiphophorus maculatus
- Oryzias latipes
- Latimeria chalumnae
- Xenopus (Silurana) tropicalis
- Pelodiscus sinensis
- Anolis carolinensis
- Taeniopygia guttata
- Gallus gallus
- Meleagris gallopavo
- Ornithorhynchus anatinus
- Monodelphis domestica
- Sarcophilus harrisii
- Macropus eugenii
- Dasyurus novemcinctus
- Loxodonta africana
- Echinops telillari
- Procavia capensis
- Myotis lucifugus
- Pteropus vampyrus
- Sus scrofa
- Tursiops truncatus
- Bos taurus
- Equus caballus
- Felis catus
- Canis lupus familiaris
- Mustela putorius furo
- Alluropoda melanoleuca
- Cryptolestes cuniculus
- Cavia porcellus
- Ictidomys tridecemlineatus
- Dipodomys ordii
- Rattus norvegicus
- Mus musculus
- Tupaia belangeri
- Urolemur garnettii
- Microcebus murinus
- Tarsius syrichta
- Callithrix jacchus
- Macaca mulatta
- Nomascus leucogenys
- Pongo abelii
- Gorilla gorilla
- Pan troglodytes
- Homo sapiens
- Perkinsus marinus ATCC 50983
- Tetrahymena thermophila
- Paramecium tetraurelia strain d4 2
- Neospora caninum Liverpool
- Toxoplasma gondii
- Cryptosporidium muris RN66
- Cryptosporidium parvum Iowa II
- Cryptosporidium hominis TU502
- Theileria annulata strain Ankara
- Theileria parva strain Muguga
- Plasmodium falciparum
- Plasmodium knowlesi
- Plasmodium vivax
- Plasmodium chabaudi
- Plasmodium yoelii yoelii 17XNL
- Plasmodium berghei
- Phaeodactylum tricornutum
- Thalassiosira pseudonana
- Pythium ultimum
- Albugo liliaceae
- Hyaloperonospora arabidopsidis
- Phytophthora ramorum
- Phytophthora infestans
- Phytophthora sojae
- Trypanosoma brucei
- Trypanosoma cruzi strain CL Brener
- Leishmania braziliensis MHOM BR 75 M2904
- Leishmania mexicana MHOM GT 2001 U1103
- Leishmania major
- Leishmania donovani
- Leishmania infantum JPCM5
- Entamoeba histolytica
- Entamoeba dispar SAW760
- Dicystostellum discoideum
- Dicystostellum purpureum
- Trichomonas vaginalis G3
- Trichomonas vaginalis
- Naegleria gruberi
- Giardia lamblia ATCC 50803

- OG presence
- OG absence
- Inferred root

Dscore = 0.987  
Pvalue = 9.37e-06  
AdjPvalue = 1.12e-03

- Arabis thaliana
- Arabidopsis lyrata
- Brassica rapa
- Glycine max
- Populus trichocarpa
- Vitis vinifera
- Solanum tuberosum
- Solanum lycopersicum
- Oryza sativa Indica Group
- Oryza sativa Japonica Group
- Oryza brachyantha
- Oryza glaberrima
- Hordeum vulgare
- Brachypodium distachyon
- Zea mays
- Sorghum bicolor
- Setaria italica
- Musa acuminata
- Selaginella moellendorffii
- Physcomitrella patens
- Ostreococcus tauri
- Ostreococcus lucimarinus CCE9901
- Chlamydomonas reinhardtii
- Cyanidioschyzon merolae
- Encephalitozoon hellem ATCC 50504
- Encephalitozoon intestinalis ATCC 50506
- Encephalitozoon cuniculi GB M1
- Puccinia graminis
- Puccinia triticina
- Ustilago maydis
- Melassezia globosa CBS 7966
- Cryptococcus gattii WM276
- Cryptococcus neoformans var. neoformans JEC21
- Cryptococcus neoformans var. neoformans B 3501A
- Phanerochaete chrysosporium
- Schizophyllum commune H4 B
- Coprinopsis cinerea okayama7\_130
- Laccaria bicolor S238N H82
- Schizosaccharomyces japonicus yFS275
- Schizosaccharomyces pombe
- Clavospora lusitanae ATCC 42720
- Yarrowia lipolytica
- Candida tropicalis MYA 3404
- Candida dubliniensis CD36
- Lodderomyces elongisporus NRRL YB 4239
- Scheffersomyces stipitis CBS 6054
- Meyerozyma guilliermondii ATCC 6260
- Pichia guilliermondii
- Lachancea thermotolerans
- Kluyveromyces fragilis NRRL Y 1140
- Saccharomyces cerevisiae
- Zygosaccharomyces rouxii
- Komagataella pastoris GS115
- Vanderwaltozyma polyspora DSM 70294
- Torulopsis delbrueckii
- Candida glabrata CBS 138
- Tetrapispora phaffii CBS 4417
- Naumovozyma dairensis CBS 421
- Naumovozyma castellii CBS 4309
- Eremothecium cymbalariae DBVPG\_7215
- Eremothecium gossypii
- Tuber melanosporum
- Zymoseptoria tritici
- Phaeosphaeria nodorum
- Leptosphaeria maculans
- Pyrenophora tritici repens Pt 1C BFP
- Pyrenophora teres f. teres 0 1
- Botryotinia fuckeliana
- Sclerotinia sclerotiorum
- Verticillium albo atrum VaMs.102
- Fusarium oxysporum
- Hypocrea virens
- Hypocrea jecorina
- Nectria haematococca
- Gibberella moniliformis
- Gibberella zeae PH 1
- Gibberella zeae
- Gaeumannomyces graminis
- Magnaporthe grisea
- Magnaporthe poae
- Magnaporthe oryzae
- Podospira anserina S mat
- Neurospora crassa
- Sordaria macrospora k hell
- Myceliophthora thermophila ATCC 42464
- Chaetomium globosum CBS 148.51
- Thielavia terrestris NRRL 8126
- Uncinocarpus reesii 1704
- Ajellomyces capsulatus Nam1
- Ajellomyces dermatitidis SLH14081
- Paracoccidioides sp. lutzi Fb01
- Coccidioides posadasii C735 delta SOWgp
- Coccidioides immitis RS
- Trichophyton rubrum CBS 118892
- Trichophyton verrucosum HKI 0517
- Arthroderma benhamiae CBS 112371
- Arthroderma gypseum CBS 118893
- Arthroderma otae CBS 113480
- Talaromyces stipitatus ATCC 10500
- Neosartorya fischeri
- Emericella nidulans
- Penicillium chrysogenum Wisconsin 54 1255
- Penicillium marneffei ATCC 18224
- Aspergillus clavatus
- Aspergillus flavus
- Aspergillus oryzae
- Aspergillus niger
- Aspergillus fumigatus
- Aspergillus terreus
- Monosiga brevicollis MX1
- Amphimedon queenslandica
- Trichoplax adhaerens
- Nematostella vectensis
- Hydra magnipapillata
- Schistosoma mansoni
- Trichinella spiralis
- Pristionchus pacificus
- Caenorhabditis breneri
- Caenorhabditis briggsae
- Caenorhabditis remanei
- Caenorhabditis japonica
- Caenorhabditis elegans
- Ixodes scapularis
- Daphnia pulex
- Pediculus humanus
- Acyrtosiphon pisum
- Tribolium castaneum
- Nasonia vitripennis
- Apis mellifera
- Atta cephalotes
- Bombyx mori
- Danaus plexippus
- Heliconius melpomene
- Culex quinquefasciatus
- Aedes aegypti
- Anopheles gambiae
- Anopheles darlingi
- Drosophila virilis
- Drosophila grimshawi
- Drosophila willistoni
- Drosophila pseudoobscura
- Drosophila ananassae
- Drosophila melanogaster
- Drosophila yakuba
- Strongylocentrotus purpuratus
- Branchiostoma floridae
- Ciona intestinalis
- Ciona savignyi
- Petromyzon marinus
- Danio rerio
- Gadus morhua
- Oreochromis niloticus
- Takifugu rubripes
- Tetraodon nigroviridis
- Gasterosteus aculeatus
- Xiphophorus maculatus
- Oryzias latipes
- Latimeria chalumnae
- Xenopus (Silurana) tropicalis
- Pelodiscus sinensis
- Anolis carolinensis
- Taeniopygia guttata
- Gallus gallus
- Meleagris gallopavo
- Ornithorhynchus anatinus
- Monodelphis domestica
- Sarcophilus harrisii
- Macropus eugenii
- Dasyurus novemcinctus
- Loxodonta africana
- Echinops telillari
- Procavia capensis
- Myotis lucifugus
- Pteropus vampyrus
- Sus scrofa
- Tursiops truncatus
- Bos taurus
- Equus caballus
- Felis catus
- Canis lupus familiaris
- Mustela putorius furo
- Alluropoda melanoleuca
- Cryptolestes cuniculus
- Cavia porcellus
- Ictidomys tridecemlineatus
- Dipodomys ordii
- Rattus norvegicus
- Mus musculus
- Tupaia belangeri
- Otolemur garrettii
- Microcebus murinus
- Tarsius syrichta
- Callithrix jacchus
- Macaca mulatta
- Nomascus leucogenys
- Pongo abelii
- Gorilla gorilla
- Pan troglodytes
- Homo sapiens
- Perkinsus marinus ATCC 50983
- Tetrahymena thermophila
- Paramecium tetraurelia strain d4 2
- Neospora caninum Liverpool
- Toxoplasma gondii
- Cryptosporidium muris RN66
- Cryptosporidium parvum Iowa II
- Cryptosporidium hominis TU502
- Theileria annulata strain Ankara
- Theileria parva strain Muguga
- Plasmodium falciparum
- Plasmodium knowlesi
- Plasmodium vivax
- Plasmodium chabaudi
- Plasmodium yoelii yoelii 17XNL
- Plasmodium berghei
- Phaeodactylum tricornutum
- Thalassiosira pseudonana
- Pythium ultimum
- Albugo liliaceae
- Hyaloperonospora arabidopsidis
- Phytophthora ramorum
- Phytophthora infestans
- Phytophthora sojae
- Trypanosoma brucei
- Trypanosoma cruzi strain CL Brener
- Leishmania braziliensis MHOM BR 75 M2904
- Leishmania mexicana MHOM GT 2001 U1103
- Leishmania major
- Leishmania donovani
- Leishmania infantum JPCM5
- Entamoeba histolytica
- Entamoeba dispar SAW760
- Dicystostellum discoideum
- Dicystostellum purpureum
- Trichomonas vaginalis G3
- Trichomonas vaginalis
- Naegleria gruberi
- Giardia lamblia ATCC 50803

- OG presence
- OG absence
- Inferred root

Dscore = 0.988  
Pvalue = 1.08e-05  
AdjPvalue = 1.28e-03

# NOG13059

- Arabis thaliana
- Arabidopsis lyrata
- Brassica rapa
- Glycine max
- Populus trichocarpa
- Vitis vinifera
- Solanum tuberosum
- Solanum lycopersicum
- Oryza sativa Indica Group
- Oryza sativa Japonica Group
- Oryza brachyantha
- Oryza glaberrima
- Hordeum vulgare
- Brachypodium distachyon
- Zea mays
- Sorghum bicolor
- Setaria italica
- Musa acuminata
- Salvinella moellendorffii
- Physcomitrella patens
- Ostreococcus tauri
- Ostreococcus lucimarinus CCE9901
- Chlamydomonas reinhardtii
- Cyanidioschyzon merolae
- Encephalitozoon hellem ATCC 50504
- Encephalitozoon intestinalis ATCC 50506
- Encephalitozoon cuniculi GB M1
- Puccinia graminis
- Puccinia triticina
- Ustilago maydis
- Melassezia globosa CBS 7966
- Cryptococcus gattii WM276
- Cryptococcus neoformans var. neoformans JEC21
- Cryptococcus neoformans var. neoformans B 3501A
- Phanerochaete chrysosporium
- Schizophyllum commune H4 B
- Coprinopsis cinerea okayama7\_130
- Laccaria bicolor S238N H82
- Schizosaccharomyces japonicus yFS275
- Schizosaccharomyces pombe
- Clavospora lusitanae ATCC 42720
- Yarrowia lipolytica
- Candida tropicalis MYA 3404
- Candida dubliniensis CD36
- Lodderomyces elongisporus NRRL YB 4239
- Scheffersomyces stipitis CBS 6054
- Meyerozyma guilliermondii ATCC 6260
- Pichia guilliermondii
- Lachancea thermotolerans
- Kluyveromyces fragilis NRRL Y 1140
- Saccharomyces cerevisiae
- Zygosaccharomyces rouxii
- Komagataella pastoris GS115
- Vanderwaltozyma polyspora DSM 70294
- Torulopsis delbrueckii
- Candida glabrata CBS 138
- Tetrapispora phaffii CBS 4417
- Naumovozyma dairensis CBS 421
- Naumovozyma castellii CBS 4309
- Eremothecium cymbalariae DBVPG\_7215
- Eremothecium gossypii
- Tuber melanosporum
- Zymoseptoria tritici
- Phaeosphaeria nodorum
- Leptosphaeria maculans
- Pyrenophora tritici repens Pt 1C BFP
- Pyrenophora teres f. teres 0 1
- Botryotinia fuckeliana
- Sclerotinia sclerotiorum
- Verticillium albo atrum VaMs.102
- Fusarium oxysporum
- Hypocrea virens
- Hypocrea jecorina
- Nectria haematococca
- Gibberella moniliformis
- Gibberella zeae PH 1
- Gibberella zeae
- Gaeumannomyces graminis
- Magnaporthe grisea
- Magnaporthe poae
- Magnaporthe oryzae
- Podospira anserina S mat
- Neurospora crassa
- Sordaria macrospora k hell
- Myceliophthora thermophila ATCC 42464
- Chaetomium globosum CBS 148.51
- Thielavia terrestris NRRL 8126
- Uncinocarpus reesii 1704
- Ajellomyces capsulatus Nam1
- Ajellomyces dermatitidis SLH14081
- Paracoccidioides sp. lutzi Fb01
- Coccidioides posadasii C735 delta SOWgp
- Coccidioides immitis RS
- Trichophyton rubrum CBS 118892
- Trichophyton verrucosum HKI 0517
- Arthroderma benhamiae CBS 112371
- Arthroderma gypseum CBS 118893
- Arthroderma otae CBS 113480
- Talaromyces stipitatus ATCC 10500
- Neosartorya fischeri
- Emericella nidulans
- Penicillium chrysogenum Wisconsin 54 1255
- Penicillium marneffei ATCC 18224
- Aspergillus clavatus
- Aspergillus flavus
- Aspergillus oryzae
- Aspergillus niger
- Aspergillus fumigatus
- Aspergillus terreus
- Monosiga brevicollis MX1
- Amphimedon queenslandica
- Trichoplax adhaerens
- Nematostella vectensis
- Hydra magnipapillata
- Schistosoma mansoni
- Trichinella spiralis
- Pristionchus pacificus
- Caenorhabditis breneri
- Caenorhabditis briggsae
- Caenorhabditis remanei
- Caenorhabditis japonica
- Caenorhabditis elegans
- Ixodes scapularis
- Daphnia pulex
- Pediculus humanus
- Acyrtosiphon pisum
- Tribolium castaneum
- Nasonia vitripennis
- Apis mellifera
- Atta cephalotes
- Bombyx mori
- Danaus plexippus
- Heliconia melpomene
- Culex quinquefasciatus
- Aedes aegypti
- Anopheles gambiae
- Anopheles darlingi
- Drosophila virilis
- Drosophila grimshawi
- Drosophila willistoni
- Drosophila pseudoobscura
- Drosophila ananassae
- Drosophila melanogaster
- Drosophila yakuba
- Strongylocentrotus purpuratus
- Branchiostoma floridae
- Ciona intestinalis
- Ciona savignyi
- Petromyzon marinus
- Danio rerio
- Gadus morhua
- Oreochromis niloticus
- Takifugu rubripes
- Tetraodon nigroviridis
- Gasterosteus aculeatus
- Xiphophorus maculatus
- Oryzias latipes
- Latimeria chalumnae
- Xenopus (Silurana) tropicalis
- Pelodiscus sinensis
- Anolis carolinensis
- Taeniopygia guttata
- Gallus gallus
- Meleagris gallopavo
- Ornithorhynchus anatinus
- Monodelphis domestica
- Sarcophilus harrisii
- Macropus eugenii
- Dasyurus novemcinctus
- Loxodonta africana
- Echinosorex tillamii
- Procavia capensis
- Myotis lucifugus
- Pteropus vampyrus
- Sus scrofa
- Tursiops truncatus
- Bos taurus
- Equus caballus
- Felis catus
- Canis lupus familiaris
- Mustela putorius furo
- Alluropoda melanoleuca
- Cryptolestes cuniculus
- Cavia porcellus
- Ictidomys tridecemlineatus
- Dipodomys ordii
- Rattus norvegicus
- Mus musculus
- Tupaia belangeri
- Otolomus garrettii
- Microcebus murinus
- Tarsius syrichta
- Callithrix jacchus
- Macaca mulatta
- Nomascus leucogenys
- Pongo abelii
- Gorilla gorilla
- Pan troglodytes
- Homo sapiens
- Perkinsus marinus ATCC 50983
- Tetrahymena thermophila
- Paramecium tetraurelia strain d4 2
- Neospora caninum Liverpool
- Toxoplasma gondii
- Cryptosporidium muris RN66
- Cryptosporidium parvum Iowa II
- Cryptosporidium hominis TU502
- Theileria annulata strain Ankara
- Theileria parva strain Muguga
- Plasmodium falciparum
- Plasmodium knowlesi
- Plasmodium vivax
- Plasmodium chabaudi
- Plasmodium yoelii yoelii 17XNL
- Plasmodium berghei
- Phaeodactylum tricoratum
- Thalassiosira pseudonana
- Pythium ultimum
- Albugo liliaceae
- Hyaloperonospora arabidopsidis
- Phytophthora ramorum
- Phytophthora infestans
- Phytophthora sojae
- Trypanosoma brucei
- Trypanosoma cruzi strain CL Brener
- Leishmania braziliensis MHOM BR 75 M2904
- Leishmania mexicana MHOM GT 2001 U1103
- Leishmania major
- Leishmania donovani
- Leishmania infantum JPCM5
- Entamoeba histolytica
- Entamoeba dispar SAW760
- Dicystostellum discoideum
- Dicystostellum purpureum
- Trichomonas vaginalis G3
- Trichomonas vaginalis
- Naegleria gruberi
- Giardia lamblia ATCC 50803

- OG presence
- OG absence
- Inferred root

Dscore = 0.956

Pvalue = 1.23e-05

AdjPvalue = 1.47e-03

- Arabis thaliana
- Arabidopsis lyrata
- Brassica rapa
- Glycine max
- Populus trichocarpa
- Vitis vinifera
- Solanum tuberosum
- Solanum lycopersicum
- Oryza sativa Indica Group
- Oryza sativa Japonica Group
- Oryza brachyantha
- Oryza glaberrima
- Hordeum vulgare
- Brachypodium distachyon
- Zea mays
- Sorghum bicolor
- Setaria italica
- Musa acuminata
- Selaginella moellendorffii
- Physcomitrella patens
- Ostreococcus tauri
- Ostreococcus lucimarinus CCE9901
- Chlamydomonas reinhardtii
- Cyanidioschyzon merolae
- Encephalitozoon hellem ATCC 50504
- Encephalitozoon intestinalis ATCC 50506
- Encephalitozoon cuniculi GB M1
- Puccinia graminis
- Puccinia triticina
- Ustilago maydis
- Melassezia globosa CBS 7966
- Cryptococcus gattii WM276
- Cryptococcus neoformans var. neoformans JEC21
- Cryptococcus neoformans var. neoformans B 3501A
- Phanerochaete chrysosporium
- Schizophyllum commune H4 B
- Coprinopsis cinerea okayama7\_130
- Laccaria bicolor S238N H82
- Schizosaccharomyces japonicus yFS275
- Schizosaccharomyces pombe
- Clavospora lusitanae ATCC 42720
- Yarrowia lipolytica
- Candida tropicalis MYA 3404
- Candida dubliniensis CD36
- Lodderomyces elongisporus NRRL YB 4239
- Scheffersomyces stipitis CBS 6054
- Meyerozyma guilliermondii ATCC 6260
- Pichia guilliermondii
- Lachancea thermotolerans
- Kluyveromyces fragilis NRRL Y 1140
- Saccharomyces cerevisiae
- Zygosaccharomyces rouxii
- Komagataella pastoris GS115
- Vanderwaltozyma polyspora DSM 70294
- Torulopsis delbrueckii
- Candida glabrata CBS 138
- Tetrapispora phaffii CBS 4417
- Naumovozyma dairenensis CBS 421
- Naumovozyma castellii CBS 4309
- Eremothecium cymbalariae DBVPG\_7215
- Eremothecium gossypii
- Tuber melanosporum
- Zymoseptoria tritici
- Phaeosphaeria nodorum
- Leptosphaeria maculans
- Pyrenophora tritici repens Pt 1C BFP
- Pyrenophora teres f. teres 0 1
- Botryotinia fuckeliana
- Sclerotinia sclerotiorum
- Verticillium albo atrum VaMs.102
- Fusarium oxysporum
- Hypocrea virens
- Hypocrea jecorina
- Nectria haematococca
- Gibberella moniliformis
- Gibberella zeae PH 1
- Gibberella zeae
- Gaeumannomyces graminis
- Magnaporthe grisea
- Magnaporthe poae
- Magnaporthe oryzae
- Podospira anserina S mat
- Neurospora crassa
- Sordaria macrospora k hell
- Myceliophthora thermophila ATCC 42464
- Chaetomium globosum CBS 148.51
- Thielavia terrestris NRRL 8126
- Uncinocarpus reesii 1704
- Ajellomyces capsulatus Nam1
- Ajellomyces dermatitidis SLH14081
- Paracoccidioides sp. lutzi Fb01
- Coccidioides posadasii C735 delta SOWgp
- Coccidioides immitis RS
- Trichophyton rubrum CBS 118892
- Trichophyton verrucosum HKI 0517
- Arthroderma benhamiae CBS 112371
- Arthroderma gypseum CBS 118893
- Arthroderma otae CBS 113480
- Talaromyces stipitatus ATCC 10500
- Neosartorya fischeri
- Emericella nidulans
- Penicillium chrysogenum Wisconsin 54 1255
- Penicillium marneffei ATCC 18224
- Aspergillus clavatus
- Aspergillus flavus
- Aspergillus oryzae
- Aspergillus niger
- Aspergillus fumigatus
- Aspergillus terreus
- Monosiga brevicollis MX1
- Amphimedon queenslandica
- Trichoplax adhaerens
- Nematostella vectensis
- Hydra magnipapillata
- Schistosoma mansoni
- Trichinella spiralis
- Pristionchus pacificus
- Caenorhabditis brenneri
- Caenorhabditis briggsae
- Caenorhabditis remanei
- Caenorhabditis japonica
- Caenorhabditis elegans
- Ixodes scapularis
- Daphnia pulex
- Pediculus humanus
- Acyrtosiphon pisum
- Tribolium castaneum
- Nasonia vitripennis
- Apis mellifera
- Atta cephalotes
- Bombyx mori
- Danaus plexippus
- Heliconius melpomene
- Culex quinquefasciatus
- Aedes aegypti
- Anopheles gambiae
- Anopheles darlingi
- Drosophila virilis
- Drosophila grimshawi
- Drosophila willistoni
- Drosophila pseudoobscura
- Drosophila ananassae
- Drosophila melanogaster
- Drosophila yakuba
- Strongylocentrotus purpuratus
- Branchiostoma floridae
- Ciona intestinalis
- Ciona savignyi
- Petromyzon marinus
- Danio rerio
- Gadus morhua
- Oreochromis niloticus
- Takifugu rubripes
- Tetraodon nigroviridis
- Gasterosteus aculeatus
- Xiphophorus maculatus
- Oryzias latipes
- Latimeria chalumnae
- Xenopus (Silurana) tropicalis
- Pelodiscus sinensis
- Anolis carolinensis
- Taeniopygia guttata
- Gallus gallus
- Meleagris gallopavo
- Ornithorhynchus anatinus
- Monodelphis domestica
- Sarcophilus harrisii
- Macropus eugenii
- Dasyurus novemcinctus
- Loxodonta africana
- Echinosorex tillarii
- Procavia capensis
- Myotis lucifugus
- Pteropus vampyrus
- Sus scrofa
- Tursiops truncatus
- Bos taurus
- Equus caballus
- Felis catus
- Canis lupus familiaris
- Mustela putorius furo
- Alluropoda melanoleuca
- Cryptolestes cuniculus
- Cavia porcellus
- Ictidomys tridecemlineatus
- Dipodomys ordii
- Rattus norvegicus
- Mus musculus
- Tupaia belangeri
- Otolomus garretti
- Microcebus murinus
- Tarsius syrichta
- Callithrix jacchus
- Macaca mulatta
- Nomascus leucogenys
- Pongo abelii
- Gorilla gorilla
- Pan troglodytes
- Homo sapiens
- Perkinsus marinus ATCC 50983
- Tetrahymena thermophila
- Paramecium tetraurelia strain d4 2
- Neospora caninum Liverpool
- Toxoplasma gondii
- Cryptosporidium muris RN66
- Cryptosporidium parvum Iowa II
- Cryptosporidium hominis TU502
- Theileria annulata strain Ankara
- Theileria parva strain Muguga
- Plasmodium falciparum
- Plasmodium knowlesi
- Plasmodium vivax
- Plasmodium chabaudi
- Plasmodium yoelii yoelii 17XNL
- Plasmodium berghei
- Phaeodactylum tricornutum
- Thalassiosira pseudonana
- Pythium ultimum
- Albugo liliaceae
- Hyaloperonospora arabidopsidis
- Phytophthora ramorum
- Phytophthora infestans
- Phytophthora sojae
- Trypanosoma brucei
- Trypanosoma cruzi strain CL Brener
- Leishmania braziliensis MHOM BR 75 M2904
- Leishmania mexicana MHOM GT 2001 U1103
- Leishmania major
- Leishmania donovani
- Leishmania infantum JPCM5
- Entamoeba histolytica
- Entamoeba dispar SAW760
- Dicystostellum discoideum
- Dicystostellum purpureum
- Trichomonas vaginalis G3
- Trichomonas vaginalis
- Naegleria gruberi
- Giardia lamblia ATCC 50803

- OG presence
- OG absence
- Inferred root

Dscore = 1  
Pvalue = 4.63e-06  
AdjPvalue = 5.52e-04

- Arabis thaliana
- Arabis lyrata
- Brassica rapa
- Glycine max
- Populus trichocarpa
- Vitis vinifera
- Solanum tuberosum
- Solanum lycopersicum
- Oryza sativa Indica Group
- Oryza sativa Japonica Group
- Oryza brachyantha
- Oryza glaberrima
- Hordeum vulgare
- Brachypodium distachyon
- Zea mays
- Sorghum bicolor
- Setaria italica
- Musa acuminata
- Salvinella moellendorffii
- Physcomitrella patens
- Ostreococcus tauri
- Ostreococcus lucimarinus CCE9901
- Chlamydomonas reinhardtii
- Cyanidioschyzon merolae
- Encephalitozoon hellem ATCC 50504
- Encephalitozoon intestinalis ATCC 50506
- Encephalitozoon cuniculi GB M1
- Puccinia graminis
- Puccinia triticina
- Ustilago maydis
- Melassezia globosa CBS 7966
- Cryptococcus gattii WM276
- Cryptococcus neoformans var. neoformans JEC21
- Cryptococcus neoformans var. neoformans B 3501A
- Phanerochaete chrysosporium
- Schizophyllum commune H4 B
- Coprinopsis cinerea okayama7\_130
- Laccaria bicolor S238N H82
- Schizosaccharomyces japonicus yFS275
- Schizosaccharomyces pombe
- Clavospora lusitanae ATCC 42720
- Yarrowia lipolytica
- Candida tropicalis MYA 3404
- Candida dubliniensis CD36
- Lodderomyces elongisporus NRRL YB 4239
- Scheffersomyces stipitis CBS 6054
- Meyeromyces guilliermondii ATCC 6260
- Pichia guilliermondii
- Lachancea thermotolerans
- Kluyveromyces fragilis NRRL Y 1140
- Saccharomyces cerevisiae
- Zygosaccharomyces rouxii
- Komagataella pastoris GS115
- Vanderwaltozyma polyspora DSM 70294
- Torulopsis delbrueckii
- Candida glabrata CBS 138
- Tetrapispora phaffii CBS 4417
- Naumovozyma dairensis CBS 421
- Naumovozyma castellii CBS 4309
- Eremothecium cymbalariae DBVPG\_7215
- Eremothecium gossypii
- Tuber melanosporum
- Zymoseptoria tritici
- Phaeosphaeria nodorum
- Leptosphaeria maculans
- Pyrenophora tritici repens Pt 1C BFP
- Pyrenophora teres f. teres 0 1
- Botryotinia fuckeliana
- Sclerotinia sclerotiorum
- Verticillium albo atrum VaMs.102
- Fusarium oxysporum
- Hypocrea virens
- Hypocrea jecorina
- Nectria haematococca
- Gibberella moniliformis
- Gibberella zeae PH 1
- Gibberella zeae
- Gaeumannomyces graminis
- Magnaporthe grisea
- Magnaporthe poae
- Magnaporthe oryzae
- Podospira anserina S mat
- Neurospora crassa
- Sordaria macrospora k hell
- Myceliophthora thermophila ATCC 42464
- Chaetomium globosum CBS 148.51
- Thielavia terrestris NRRL 8126
- Uncinocarpus reesii 1704
- Ajellomyces capsulatus Nam1
- Ajellomyces dermatitidis SLH14081
- Paracoccidioides sp. lutzi Fb01
- Coccidioides posadasii C735 delta SOWgp
- Coccidioides immitis RS
- Trichophyton rubrum CBS 118892
- Trichophyton verrucosum HKI 0517
- Arthroderma benhamiae CBS 112371
- Arthroderma gypseum CBS 118893
- Arthroderma otae CBS 113480
- Talaromyces stipitatus ATCC 10500
- Neosartorya fischeri
- Emericella nidulans
- Penicillium chrysogenum Wisconsin 54 1255
- Penicillium marneffei ATCC 18224
- Aspergillus clavatus
- Aspergillus flavus
- Aspergillus oryzae
- Aspergillus niger
- Aspergillus fumigatus
- Aspergillus terreus
- Monosiga brevicollis MX1
- Amphimedon queenslandica
- Trichoplax adhaerens
- Nematostella vectensis
- Hydra magnipapillata
- Schistosoma mansoni
- Trichinella spiralis
- Pristionchus pacificus
- Caenorhabditis brenneri
- Caenorhabditis briggsae
- Caenorhabditis remanei
- Caenorhabditis japonica
- Caenorhabditis elegans
- Ixodes scapularis
- Daphnia pulex
- Pediculus humanus
- Acyrtosiphon pisum
- Tribolium castaneum
- Nasonia vitripennis
- Apis mellifera
- Atta cephalotes
- Bombyx mori
- Danaus plexippus
- Heliconius melpomene
- Culex quinquefasciatus
- Aedes aegypti
- Anopheles gambiae
- Anopheles darlingi
- Drosophila virilis
- Drosophila grimshawi
- Drosophila willistoni
- Drosophila pseudoobscura
- Drosophila ananassae
- Drosophila melanogaster
- Drosophila yakuba
- Strongylocentrotus purpuratus
- Branchiostoma floridae
- Ciona intestinalis
- Ciona savignyi
- Petromyzon marinus
- Danio rerio
- Gadus morhua
- Oreochromis niloticus
- Takifugu rubripes
- Tetraodon nigroviridis
- Gasterosteus aculeatus
- Xiphophorus maculatus
- Oryzias latipes
- Latimeria chalumnae
- Xenopus (Silurana) tropicalis
- Pelodiscus sinensis
- Anolis carolinensis
- Taeniopygia guttata
- Gallus gallus
- Meleagris gallopavo
- Ornithorhynchus anatinus
- Monodelphis domestica
- Sarcophilus harrisii
- Macropus eugenii
- Dasyurus novemcinctus
- Loxodonta africana
- Echinops telillari
- Procavia capensis
- Myotis lucifugus
- Pteropus vampyrus
- Sus scrofa
- Tursiops truncatus
- Bos taurus
- Equus caballus
- Felis catus
- Canis lupus familiaris
- Mustela putorius furo
- Alluropoda melanoleuca
- Cryptolestes cuniculus
- Cavia porcellus
- Ictidomys tridecemlineatus
- Dipodomys ordii
- Rattus norvegicus
- Mus musculus
- Tupaia belangeri
- Otolomus garrettii
- Microcebus murinus
- Tarsius syrichta
- Callithrix jacchus
- Macaca mulatta
- Nomascus leucogenys
- Pongo abelii
- Gorilla gorilla
- Pan troglodytes
- Homo sapiens
- Perkinsus marinus ATCC 50983
- Tetrahymena thermophila
- Paramecium tetraurelia strain d4 2
- Neospora caninum Liverpool
- Toxoplasma gondii
- Cryptosporidium muris RN66
- Cryptosporidium parvum Iowa II
- Cryptosporidium hominis TU502
- Theileria annulata strain Ankara
- Theileria parva strain Muguga
- Plasmodium falciparum
- Plasmodium knowlesi
- Plasmodium vivax
- Plasmodium chabaudi
- Plasmodium yoelii yoelii 17XNL
- Plasmodium berghei
- Phaeodactylum tricornutum
- Thalassiosira pseudonana
- Pythium ultimum
- Albugo liliaceae
- Hyaloperonospora arabidopsidis
- Phytophthora ramorum
- Phytophthora infestans
- Phytophthora sojae
- Trypanosoma brucei
- Trypanosoma cruzi strain CL Brener
- Leishmania braziliensis MHOM BR 75 M2904
- Leishmania mexicana MHOM GT 2001 U1103
- Leishmania major
- Leishmania donovani
- Leishmania infantum JPCM5
- Entamoeba histolytica
- Entamoeba dispar SAW760
- Dicystostellum discoideum
- Dicystostellum purpureum
- Trichomonas vaginalis G3
- Trichomonas vaginalis
- Naegleria gruberi
- Giardia lamblia ATCC 50803

- OG presence
- OG absence
- Inferred root

Dscore = 0.854  
Pvalue = 3.2e-05  
AdjPvalue = 3.8e-03

- Arabis thaliana
- Arabidopsis lyrata
- Brassica rapa
- Glycine max
- Populus trichocarpa
- Vitis vinifera
- Solanum tuberosum
- Solanum lycopersicum
- Oryza sativa Indica Group
- Oryza sativa Japonica Group
- Oryza brachyantha
- Oryza glaberrima
- Hordeum vulgare
- Brachypodium distachyon
- Zea mays
- Sorghum bicolor
- Setaria italica
- Musa acuminata
- Salvinella moellendorffii
- Physcomitrella patens
- Ostreococcus tauri
- Ostreococcus lucimarinus CCE9901
- Chlamydomonas reinhardtii
- Cyanidioschyzon merolae
- Encephalitozoon hellem ATCC 50504
- Encephalitozoon intestinalis ATCC 50506
- Encephalitozoon cuniculi GB M1
- Puccinia graminis
- Puccinia triticina
- Ustilago maydis
- Melassezia globosa CBS 7966
- Cryptococcus gattii WM276
- Cryptococcus neoformans var. neoformans JEC21
- Cryptococcus neoformans var. neoformans B 3501A
- Phanerochaete chrysosporium
- Schizophyllum commune H4 B
- Coprinopsis cinerea okayama7\_130
- Laccaria bicolor S238N H82
- Schizosaccharomyces japonicus yFS275
- Schizosaccharomyces pombe
- Clavospora lusitanae ATCC 42720
- Yarrowia lipolytica
- Candida tropicalis MYA 3404
- Candida dubliniensis CD36
- Lodderomyces elongisporus NRRL YB 4239
- Scheffersomyces stipitis CBS 6054
- Meyerozyma guilliermondii ATCC 6260
- Pichia guilliermondii
- Lachancea thermotolerans
- Kluyveromyces fragilis NRRL Y 1140
- Saccharomyces cerevisiae
- Zygosaccharomyces rouxii
- Komagataella pastoris GS115
- Vanderwaltozyma polyspora DSM 70294
- Torulopsis delbrueckii
- Candida glabrata CBS 138
- Tetrapispora phaffii CBS 4417
- Naumovozyma dairensis CBS 421
- Naumovozyma castellii CBS 4309
- Eremothecium cymbalariae DBVPG\_7215
- Eremothecium gossypii
- Tuber melanosporum
- Zymoseptoria tritici
- Phaeosphaeria nodorum
- Leptosphaeria maculans
- Pyrenophora tritici repens Pt 1C BFP
- Pyrenophora teres f. teres 0 1
- Botryotinia fuckeliana
- Sclerotinia sclerotiorum
- Verticillium albo atrum VaMs.102
- Fusarium oxysporum
- Hypocrea virens
- Hypocrea jecorina
- Nectria haematococca
- Gibberella moniliformis
- Gibberella zeae PH 1
- Gibberella zeae
- Gaeumannomyces graminis
- Magnaporthe grisea
- Magnaporthe poae
- Magnaporthe oryzae
- Podospira anserina S mat
- Neurospora crassa
- Sordaria macrospora k hell
- Myceliophthora thermophila ATCC 42464
- Chaetomium globosum CBS 148.51
- Thielavia terrestris NRRL 8126
- Uncinocarpus reesii 1704
- Ajellomyces capsulatus Nam1
- Ajellomyces dermatitidis SLH14081
- Paracoccidioides sp. lutzi Fb01
- Coccidioides posadasii C735 delta SOWgp
- Coccidioides immitis RS
- Trichophyton rubrum CBS 118892
- Trichophyton verrucosum HKI 0517
- Arthroderma benhamiae CBS 112371
- Arthroderma gypseum CBS 118893
- Arthroderma otae CBS 113480
- Talaromyces stipitatus ATCC 10500
- Neosartorya fischeri
- Emericella nidulans
- Penicillium chrysogenum Wisconsin 54 1255
- Penicillium marneffei ATCC 18224
- Aspergillus clavatus
- Aspergillus flavus
- Aspergillus oryzae
- Aspergillus niger
- Aspergillus fumigatus
- Aspergillus terreus
- Monosiga brevicollis MX1
- Amphimedon queenslandica
- Trichoplax adhaerens
- Nematostella vectensis
- Hydra magnipapillata
- Schistosoma mansoni
- Trichiella spiralis
- Pristionchus pacificus
- Caenorhabditis brenneri
- Caenorhabditis briggsae
- Caenorhabditis remanei
- Caenorhabditis japonica
- Caenorhabditis elegans
- Ixodes scapularis
- Daphnia pulex
- Pediculus humanus
- Acyrtosiphon pisum
- Tribolium castaneum
- Nasonia vitripennis
- Apis mellifera
- Atta cephalotes
- Bombyx mori
- Danaus plexippus
- Heliconius melpomene
- Culex quinquefasciatus
- Aedes aegypti
- Anopheles gambiae
- Anopheles darlingi
- Drosophila virilis
- Drosophila grimshawi
- Drosophila willistoni
- Drosophila pseudoobscura
- Drosophila ananassae
- Drosophila melanogaster
- Drosophila yakuba
- Strongylocentrotus purpuratus
- Branchiostoma floridae
- Ciona intestinalis
- Ciona savignyi
- Petromyzon marinus
- Danio rerio
- Gadus morhua
- Oreochromis niloticus
- Takifugu rubripes
- Tetraodon nigroviridis
- Gasterosteus aculeatus
- Xiphophorus maculatus
- Oryzias latipes
- Latimeria chalumnae
- Xenopus (Silurana) tropicalis
- Pelodiscus sinensis
- Anolis carolinensis
- Taeniopygia guttata
- Gallus gallus
- Meleagris gallopavo
- Ornithorhynchus anatinus
- Monodelphis domestica
- Sarcophilus harrisii
- Macropus eugenii
- Dasyurus novemcinctus
- Loxodonta africana
- Echinops telfairii
- Procavia capensis
- Myotis lucifugus
- Pteropus vampyrus
- Sus scrofa
- Tursiops truncatus
- Bos taurus
- Equus caballus
- Felis catus
- Canis lupus familiaris
- Mustela putorius furo
- Alluropoda melanoleuca
- Cryptolepis cuniculus
- Cavia porcellus
- Ictidomys tridecemlineatus
- Dipodomys ordii
- Rattus norvegicus
- Mus musculus
- Tupaia belangeri
- Otolemur garrettii
- Microcebus murinus
- Tarsius syrichta
- Callithrix jacchus
- Macaca mulatta
- Nomascus leucogenys
- Pongo abelii
- Gorilla gorilla
- Pan troglodytes
- Homo sapiens
- Perkinsus marinus ATCC 50983
- Tetrahymena thermophila
- Paramecium tetraurelia strain d4 2
- Neospora caninum Liverpool
- Toxoplasma gondii
- Cryptosporidium muris RN66
- Cryptosporidium parvum Iowa II
- Cryptosporidium hominis TU502
- Theileria annulata strain Ankara
- Theileria parva strain Muguga
- Plasmodium falciparum
- Plasmodium knowlesi
- Plasmodium vivax
- Plasmodium chabaudi
- Plasmodium yoelii yoelii 17XNL
- Plasmodium berghei
- Phaeodactylum tricornutum
- Thalassiosira pseudonana
- Pythium ultimum
- Albugo liliaceae
- Hyaloperonospora arabidopsidis
- Phytophthora ramorum
- Phytophthora infestans
- Phytophthora sojae
- Trypanosoma brucei
- Trypanosoma cruzi strain CL Brener
- Leishmania braziliensis MHOM BR 75 M2904
- Leishmania mexicana MHOM GT 2001 U1103
- Leishmania major
- Leishmania donovani
- Leishmania infantum JPCM5
- Entamoeba histolytica
- Entamoeba dispar SAW760
- Dicystostellum discoideum
- Dicystostellum purpureum
- Trichomonas vaginalis G3
- Trichomonas vaginalis
- Naegleria gruberi
- Giardia lamblia ATCC 50803

- OG presence
- OG absence
- Inferred root

Dscore = 0.992  
Pvalue = 7.34e-06  
AdjPvalue = 8.74e-04



- Arabis thaliana
- Arabidopsis lyrata
- Brassica rapa
- Glycine max
- Populus trichocarpa
- Vitis vinifera
- Solanum tuberosum
- Solanum lycopersicum
- Oryza sativa Indica Group
- Oryza sativa Japonica Group
- Oryza brachyantha
- Oryza glaberrima
- Hordeum vulgare
- Brachypodium distachyon
- Zea mays
- Sorghum bicolor
- Setaria italica
- Musa acuminata
- Selaginella moellendorffii
- Physcomitrella patens
- Ostreococcus tauri
- Ostreococcus lucimarinus CCE9901
- Chlamydomonas reinhardtii
- Cyanidioschyzon merolae
- Encephalitozoon hellem ATCC 50504
- Encephalitozoon intestinalis ATCC 50506
- Encephalitozoon cuniculi GB M1
- Puccinia graminis
- Puccinia triticina
- Ustilago maydis
- Melassezia globosa CBS 7966
- Cryptococcus gattii WM276
- Cryptococcus neoformans var. neoformans JEC21
- Cryptococcus neoformans var. neoformans B 3501A
- Phanerochaete chrysosporium
- Schizophyllum commune H4 B
- Coprinopsis cinerea okayama7\_130
- Laccaria bicolor S238N H82
- Schizosaccharomyces japonicus yFS275
- Schizosaccharomyces pombe
- Clavospora lusitanae ATCC 42720
- Yarrowia lipolytica
- Candida tropicalis MYA 3404
- Candida dubliniensis CD36
- Lodderomyces elongisporus NRRL YB 4239
- Scheffersomyces stipitis CBS 6054
- Meyerozyma guilliermondii ATCC 6260
- Pichia guilliermondii
- Lachancea thermotolerans
- Kluyveromyces fragilis NRRL Y 1140
- Saccharomyces cerevisiae
- Zygosaccharomyces rouxii
- Komagataella pastoris GS115
- Vanderwaltozyma polyspora DSM 70294
- Torulopsis delbrueckii
- Candida glabrata CBS 138
- Tetrapispora phaffii CBS 4417
- Naumovozyma dairensis CBS 421
- Naumovozyma castellii CBS 4309
- Eremothecium cymbalariae DBVPG\_7215
- Eremothecium gossypii
- Tuber melanosporum
- Zyoseptoria tritici
- Phaeosphaeria nodorum
- Leptosphaeria maculans
- Pyrenophora tritici repens Pt 1C BFP
- Pyrenophora teres f. teres 0 1
- Botryotinia fuckeliana
- Sclerotinia sclerotiorum
- Verticillium albo atrum VaMs.102
- Fusarium oxysporum
- Hypocrea virens
- Hypocrea jecorina
- Nectria haematococca
- Gibberella moniliformis
- Gibberella zeae PH 1
- Gibberella zeae
- Gaeumannomyces graminis
- Magnaporthe grisea
- Magnaporthe poae
- Magnaporthe oryzae
- Podospira anserina S mat
- Neurospora crassa
- Sordaria macrospora k hell
- Myceliophthora thermophila ATCC 42464
- Chaetomium globosum CBS 148.51
- Thielavia terrestris NRRL 8126
- Uncinocarpus reesii 1704
- Ajellomyces capsulatus Nam1
- Ajellomyces dermatitidis SLH14081
- Paracoccidioides sp. lutzi Fb01
- Coccidioides posadasii C735 delta SOWgp
- Coccidioides immitis RS
- Trichophyton rubrum CBS 118892
- Trichophyton verrucosum HKI 0517
- Arthroderma benhamiae CBS 112371
- Arthroderma gypseum CBS 118893
- Arthroderma otae CBS 113480
- Talaromyces stipitatus ATCC 10500
- Neosartorya fischeri
- Emericella nidulans
- Penicillium chrysogenum Wisconsin 54 1255
- Penicillium marneffei ATCC 18224
- Aspergillus clavatus
- Aspergillus flavus
- Aspergillus oryzae
- Aspergillus niger
- Aspergillus fumigatus
- Aspergillus terreus
- Monosiga brevicollis MX1
- Amphimedon queenslandica
- Trichoplax adhaerens
- Nematostella vectensis
- Hydra magnipapillata
- Schistosoma mansoni
- Trichinella spiralis
- Pristionchus pacificus
- Caenorhabditis brenneri
- Caenorhabditis briggsae
- Caenorhabditis remanei
- Caenorhabditis japonica
- Caenorhabditis elegans
- Ixodes scapularis
- Daphnia pulex
- Pediculus humanus
- Acyrtosiphon pisum
- Tribolium castaneum
- Nasonia vitripennis
- Apis mellifera
- Atta cephalotes
- Bombyx mori
- Danaus plexippus
- Heliconia melpomene
- Culex quinquefasciatus
- Aedes aegypti
- Anopheles gambiae
- Anopheles darlingi
- Drosophila virilis
- Drosophila grimshawi
- Drosophila willistoni
- Drosophila pseudoobscura
- Drosophila ananassae
- Drosophila melanogaster
- Drosophila yakuba
- Strongylocentrotus purpuratus
- Branchiostoma floridae
- Ciona intestinalis
- Ciona savignyi
- Petromyzon marinus
- Danio rerio
- Gadus morhua
- Oreochromis niloticus
- Takifugu rubripes
- Tetraodon nigroviridis
- Gasterosteus aculeatus
- Xiphophorus maculatus
- Oryzias latipes
- Latimeria chalumnae
- Xenopus (Silurana) tropicalis
- Pelodiscus sinensis
- Anolis carolinensis
- Taeniopygia guttata
- Gallus gallus
- Meleagris gallopavo
- Ornithorhynchus anatinus
- Monodelphis domestica
- Sarcophilus harrisii
- Macropus eugenii
- Dasyurus novemcinctus
- Loxodonta africana
- Echinops telillari
- Procavia capensis
- Myotis lucifugus
- Pteropus vampyrus
- Sus scrofa
- Tursiops truncatus
- Bos taurus
- Equus caballus
- Felis catus
- Canis lupus familiaris
- Mustela putorius furo
- Alluropoda melanoleuca
- Cryptolestes cuniculus
- Cavia porcellus
- Ictidomys tridecemlineatus
- Dipodomys ordii
- Rattus norvegicus
- Mus musculus
- Tupaia belangeri
- Otolomus garrettii
- Microcebus murinus
- Tarsius syrichta
- Callithrix jacchus
- Macaca mulatta
- Nomascus leucogenys
- Pongo abelii
- Gorilla gorilla
- Pan troglodytes
- Homo sapiens
- Perkinsus marinus ATCC 50983
- Tetrahymena thermophila
- Paramecium tetraurelia strain d4 2
- Neospora caninum Liverpool
- Toxoplasma gondii
- Cryptosporidium muris RN66
- Cryptosporidium parvum Iowa II
- Cryptosporidium hominis TU502
- Theileria annulata strain Ankara
- Theileria parva strain Muguga
- Plasmodium falciparum
- Plasmodium knowlesi
- Plasmodium vivax
- Plasmodium chabaudi
- Plasmodium yoelii yoelii 17XNL
- Plasmodium berghei
- Phaeodactylum tricornutum
- Thalassiosira pseudonana
- Pythium ultimum
- Albugo liliaceae
- Hyaloperonospora arabidopsidis
- Phytophthora ramorum
- Phytophthora infestans
- Phytophthora sojae
- Trypanosoma brucei
- Trypanosoma cruzi strain CL Brener
- Leishmania braziliensis MHOM BR 75 M2904
- Leishmania mexicana MHOM GT 2001 U1103
- Leishmania major
- Leishmania donovani
- Leishmania infantum JPCM5
- Entamoeba histolytica
- Entamoeba dispar SAW760
- Dicystostellum discoideum
- Dicystostellum purpureum
- Trichomonas vaginalis G3
- Trichomonas vaginalis
- Naegleria gruberi
- Giardia lamblia ATCC 50803

- OG presence
- OG absence
- Inferred root

Dscore = 0.978  
Pvalue = 1.02e-05  
AdjPvalue = 1.22e-03

- Arabis thaliana
- Arabidopsis lyrata
- Brassica rapa
- Glycine max
- Populus trichocarpa
- Vitis vinifera
- Solanum tuberosum
- Solanum lycopersicum
- Oryza sativa Indica Group
- Oryza sativa Japonica Group
- Oryza brachyantha
- Oryza glaberrima
- Hordeum vulgare
- Brachypodium distachyon
- Zea mays
- Sorghum bicolor
- Setaria italica
- Musa acuminata
- Selaginella moellendorffii
- Physcomitrella patens
- Ostreococcus tauri
- Ostreococcus lucimarinus CCE9901
- Chlamydomonas reinhardtii
- Cyanidioschyzon merolae
- Encephalitozoon hellem ATCC 50504
- Encephalitozoon intestinalis ATCC 50506
- Encephalitozoon cuniculi GB M1
- Puccinia graminis
- Puccinia triticina
- Ustilago maydis
- Melassezia globosa CBS 7966
- Cryptococcus gattii WM276
- Cryptococcus neoformans var. neoformans JEC21
- Cryptococcus neoformans var. neoformans B 3501A
- Phanerochaete chrysosporium
- Schizophyllum commune H4 B
- Coprinopsis cinerea okayama7\_130
- Laccaria bicolor S238N H82
- Schizosaccharomyces japonicus yFS275
- Schizosaccharomyces pombe
- Clavospora lusitanae ATCC 42720
- Yarrowia lipolytica
- Candida tropicalis MYA 3404
- Candida dubliniensis CD36
- Lodderomyces elongisporus NRRL YB 4239
- Scheffersomyces stipitis CBS 6054
- Meyerozyma guilliermondii ATCC 6260
- Pichia guilliermondii
- Lachancea thermotolerans
- Kluyveromyces fragilis NRRL Y 1140
- Saccharomyces cerevisiae
- Zygosaccharomyces rouxii
- Komagataella pastoris GS115
- Vanderwaltozyma polyspora DSM 70294
- Torulopsis delbrueckii
- Candida glabrata CBS 138
- Tetrapispora phaffii CBS 4417
- Naumovozyma dairensis CBS 421
- Naumovozyma castellii CBS 4309
- Eremothecium cymbalariae DBVPG\_7215
- Eremothecium gossypii
- Tuber melanosporum
- Zymoseptoria tritici
- Phaeosphaeria nodorum
- Leptosphaeria maculans
- Pyrenophora tritici repens Pt 1C BFP
- Pyrenophora teres f. teres 0 1
- Botryotinia fuckeliana
- Sclerotinia sclerotiorum
- Verticillium albo atrum VaMs.102
- Fusarium oxysporum
- Hypocrea virens
- Hypocrea jecorina
- Nectria haematococca
- Gibberella moniliformis
- Gibberella zeae PH 1
- Gibberella zeae
- Gaeumannomyces graminis
- Magnaporthe grisea
- Magnaporthe poae
- Magnaporthe oryzae
- Podospira anserina S mat
- Neurospora crassa
- Sordaria macrospora k hell
- Myceliophthora thermophila ATCC 42464
- Chaetomium globosum CBS 148.51
- Thielavia terrestris NRRL 8126
- Uncinocarpus reesii 1704
- Ajellomyces capsulatus Nam1
- Ajellomyces dermatitidis SLH14081
- Paracoccidioides sp. lutzi Fb01
- Coccidioides posadasii C735 delta SOWgp
- Coccidioides immitis RS
- Trichophyton rubrum CBS 118892
- Trichophyton verrucosum HKI 0517
- Arthroderma benhamiae CBS 112371
- Arthroderma gypseum CBS 118893
- Arthroderma otae CBS 113480
- Talaromyces stipitatus ATCC 10500
- Neosartorya fischeri
- Emericella nidulans
- Penicillium chrysogenum Wisconsin 54 1255
- Penicillium marneffei ATCC 18224
- Aspergillus clavatus
- Aspergillus flavus
- Aspergillus oryzae
- Aspergillus niger
- Aspergillus fumigatus
- Aspergillus terreus
- Monosiga brevicollis MX1
- Amphimedon queenslandica
- Trichoplax adhaerens
- Nematostella vectensis
- Hydra magnipapillata
- Schistosoma mansoni
- Trichinella spiralis
- Pristionchus pacificus
- Caenorhabditis brenneri
- Caenorhabditis briggsae
- Caenorhabditis remanei
- Caenorhabditis japonica
- Caenorhabditis elegans
- Ixodes scapularis
- Daphnia pulex
- Pediculus humanus
- Acyrtosiphon pisum
- Tribolium castaneum
- Nasonia vitripennis
- Apis mellifera
- Atta cephalotes
- Bombyx mori
- Danaus plexippus
- Heliconia melpomene
- Culex quinquefasciatus
- Aedes aegypti
- Anopheles gambiae
- Anopheles darlingi
- Drosophila virilis
- Drosophila grimshawi
- Drosophila willistoni
- Drosophila pseudoobscura
- Drosophila ananassae
- Drosophila melanogaster
- Drosophila yakuba
- Strongylocentrotus purpuratus
- Branchiostoma floridae
- Ciona intestinalis
- Ciona savignyi
- Petromyzon marinus
- Danio rerio
- Gadus morhua
- Oreochromis niloticus
- Takifugu rubripes
- Tetraodon nigroviridis
- Gasterosteus aculeatus
- Xiphophorus maculatus
- Oryzias latipes
- Latimeria chalumnae
- Xenopus (Silurana) tropicalis
- Pelodiscus sinensis
- Anolis carolinensis
- Taeniopygia guttata
- Gallus gallus
- Meleagris gallopavo
- Ornithorhynchus anatinus
- Monodelphis domestica
- Sarcophilus harrisii
- Macropus eugenii
- Dasyurus novemcinctus
- Loxodonta africana
- Echinops telillari
- Procavia capensis
- Myotis lucifugus
- Pteropus vampyrus
- Sus scrofa
- Tursiops truncatus
- Bos taurus
- Equus caballus
- Felis catus
- Canis lupus familiaris
- Mustela putorius furo
- Alluropoda melanoleuca
- Cryptolestes cuniculus
- Cavia porcellus
- Ictidomys tridecemlineatus
- Dipodomys ordii
- Rattus norvegicus
- Mus musculus
- Tupaia belangeri
- Otolomus garretti
- Microcebus murinus
- Tarsius syrichta
- Callithrix jacchus
- Macaca mulatta
- Nomascus leucogenys
- Pongo abelii
- Gorilla gorilla
- Pan troglodytes
- Homo sapiens
- Perkinsus marinus ATCC 50983
- Tetrahymena thermophila
- Paramecium tetraurelia strain d4 2
- Neospora caninum Liverpool
- Toxoplasma gondii
- Cryptosporidium muris RN66
- Cryptosporidium parvum Iowa II
- Cryptosporidium hominis TU502
- Theileria annulata strain Ankara
- Theileria parva strain Muguga
- Plasmodium falciparum
- Plasmodium knowlesi
- Plasmodium vivax
- Plasmodium chabaudi
- Plasmodium yoelii yoelii 17XNL
- Plasmodium berghei
- Phaeodactylum tricornutum
- Thalassiosira pseudonana
- Pythium ultimum
- Albugo liliaceae
- Hyaloperonospora arabidopsidis
- Phytophthora ramorum
- Phytophthora infestans
- Phytophthora sojae
- Trypanosoma brucei
- Trypanosoma cruzi strain CL Brener
- Leishmania braziliensis MHOM BR 75 M2904
- Leishmania mexicana MHOM GT 2001 U1103
- Leishmania major
- Leishmania donovani
- Leishmania infantum JPCM5
- Entamoeba histolytica
- Entamoeba dispar SAW760
- Dicystostellum discoideum
- Dicystostellum purpureum
- Trichomonas vaginalis G3
- Trichomonas vaginalis
- Naegleria gruberi
- Giardia lamblia ATCC 50803

- OG presence
- OG absence
- Inferred root

Dscore = 0.975  
Pvalue = 8.4e-06  
AdjPvalue = 1.0e-03

- Arabis thaliana
- Arabis lyrata
- Brassica rapa
- Glycine max
- Populus trichocarpa
- Vitis vinifera
- Solanum tuberosum
- Solanum lycopersicum
- Oryza sativa Indica Group
- Oryza sativa Japonica Group
- Oryza brachyantha
- Oryza glaberrima
- Hordeum vulgare
- Brachypodium distachyon
- Zea mays
- Sorghum bicolor
- Setaria italica
- Musa acuminata
- Salvinella moellendorffii
- Physcomitrella patens
- Ostreococcus tauri
- Ostreococcus lucimarinus CCE9901
- Chlamydomonas reinhardtii
- Cyanidioschyzon merolae
- Encephalitozoon hellem ATCC 50504
- Encephalitozoon intestinalis ATCC 50506
- Encephalitozoon cuniculi GB M1
- Puccinia graminis
- Puccinia triticina
- Ustilago maydis
- Melassezia globosa CBS 7966
- Cryptococcus gattii WM276
- Cryptococcus neoformans var. neoformans JEC21
- Cryptococcus neoformans var. neoformans B 3501A
- Phanerochaete chrysosporium
- Schizophyllum commune H4 B
- Coprinopsis cinerea okayama7\_130
- Laccaria bicolor S238N H82
- Schizosaccharomyces japonicus yFS275
- Schizosaccharomyces pombe
- Clavospora lusitanae ATCC 42720
- Yarrowia lipolytica
- Candida tropicalis MYA 3404
- Candida dubliniensis CD36
- Lodderomyces elongisporus NRRL YB 4239
- Scheffersomyces stipitis CBS 6054
- Meyerozyma guilliermondii ATCC 6260
- Pichia guilliermondii
- Lachancea thermotolerans
- Kluyveromyces fragilis NRRL Y 1140
- Saccharomyces cerevisiae
- Zygosaccharomyces rouxii
- Komagataella pastoris GS115
- Vanderwaltozyma polyspora DSM 70294
- Torulopsis delbrueckii
- Candida glabrata CBS 138
- Tetrapispora phaffii CBS 4417
- Naumovozyma dairensis CBS 421
- Naumovozyma castellii CBS 4309
- Eremothecium cymbalariae DBVPG\_7215
- Eremothecium gossypii
- Tuber melanosporum
- Zymoseptoria tritici
- Phaeosphaeria nodorum
- Leptosphaeria maculans
- Pyrenophora tritici repens Pt 1C BFP
- Pyrenophora teres f. teres 0 1
- Botryotinia fuckeliana
- Sclerotinia sclerotiorum
- Verticillium albo atrum VaMs.102
- Fusarium oxysporum
- Hypocrea virens
- Hypocrea jecorina
- Nectria haematococca
- Gibberella moniliformis
- Gibberella zeae PH 1
- Gibberella zeae
- Gaeumannomyces graminis
- Magnaporthe grisea
- Magnaporthe poae
- Magnaporthe oryzae
- Podospira anserina S mat
- Neurospora crassa
- Sordaria macrospora k hell
- Myceliophthora thermophila ATCC 42464
- Chaetomium globosum CBS 148.51
- Thielavia terrestris NRRL 8126
- Uncinocarpus reesii 1704
- Ajellomyces capsulatus Nam1
- Ajellomyces dermatitidis SLH14081
- Paracoccidioides sp. lutzi Fb01
- Coccidioides posadasii C735 delta SOWgp
- Coccidioides immitis RS
- Trichophyton rubrum CBS 118892
- Trichophyton verrucosum HKI 0517
- Arthroderma benhamiae CBS 112371
- Arthroderma gypseum CBS 118893
- Arthroderma otae CBS 113480
- Talaromyces stipitatus ATCC 10500
- Neosartorya fischeri
- Emericella nidulans
- Penicillium chrysogenum Wisconsin 54 1255
- Penicillium marneffei ATCC 18224
- Aspergillus clavatus
- Aspergillus flavus
- Aspergillus oryzae
- Aspergillus niger
- Aspergillus fumigatus
- Aspergillus terreus
- Monosiga brevicollis MX1
- Amphimedon queenslandica
- Trichoplax adhaerens
- Nematostella vectensis
- Hydra magnipapillata
- Schistosoma mansoni
- Trichinella spiralis
- Pristionchus pacificus
- Caenorhabditis brenneri
- Caenorhabditis briggsae
- Caenorhabditis remanei
- Caenorhabditis japonica
- Caenorhabditis elegans
- Ixodes scapularis
- Daphnia pulex
- Pediculus humanus
- Acyrtosiphon pisum
- Tribolium castaneum
- Nasonia vitripennis
- Apis mellifera
- Atta cephalotes
- Bombyx mori
- Danaus plexippus
- Heliconia melpomene
- Culex quinquefasciatus
- Aedes aegypti
- Anopheles gambiae
- Anopheles darlingi
- Drosophila virilis
- Drosophila grimshawi
- Drosophila willistoni
- Drosophila pseudoobscura
- Drosophila ananassae
- Drosophila melanogaster
- Drosophila yakuba
- Strongylocentrotus purpuratus
- Branchiostoma floridae
- Ciona intestinalis
- Ciona savignyi
- Petromyzon marinus
- Danio rerio
- Gadus morhua
- Oreochromis niloticus
- Takifugu rubripes
- Tetraodon nigroviridis
- Gasterosteus aculeatus
- Xiphophorus maculatus
- Oryzias latipes
- Latimeria chalumnae
- Xenopus (Silurana) tropicalis
- Pelodiscus sinensis
- Anolis carolinensis
- Taeniopygia guttata
- Gallus gallus
- Meleagris gallopavo
- Ornithorhynchus anatinus
- Monodelphis domestica
- Sarcophilus harrisii
- Macropus eugenii
- Dasyurus novemcinctus
- Loxodonta africana
- Echinops telillari
- Procavia capensis
- Myotis lucifugus
- Pteropus vampyrus
- Sus scrofa
- Tursiops truncatus
- Bos taurus
- Equus caballus
- Felis catus
- Canis lupus familiaris
- Mustela putorius furo
- Alluropoda melanoleuca
- Cryptolestes cuniculus
- Cavia porcellus
- Ictidomys tridecemlineatus
- Dipodomys ordii
- Rattus norvegicus
- Mus musculus
- Tupaia belangeri
- Otolemur garrettii
- Microcebus murinus
- Tarsius syrichta
- Callithrix jacchus
- Macaca mulatta
- Nomascus leucogenys
- Pongo abelii
- Gorilla gorilla
- Pan troglodytes
- Homo sapiens
- Perkinsus marinus ATCC 50983
- Tetrahymena thermophila
- Paramecium tetraurelia strain d4 2
- Neospora caninum Liverpool
- Toxoplasma gondii
- Cryptosporidium muris RN66
- Cryptosporidium parvum Iowa II
- Cryptosporidium hominis TU502
- Theileria annulata strain Ankara
- Theileria parva strain Muguga
- Plasmodium falciparum
- Plasmodium knowlesi
- Plasmodium vivax
- Plasmodium chabaudi
- Plasmodium yoelii yoelii 17XNL
- Plasmodium berghei
- Phaeodactylum tricornutum
- Thalassiosira pseudonana
- Pythium ultimum
- Albugo liliaceae
- Hyaloperonospora arabidopsidis
- Phytophthora ramorum
- Phytophthora infestans
- Phytophthora sojae
- Trypanosoma brucei
- Trypanosoma cruzi strain CL Brener
- Leishmania braziliensis MHOM BR 75 M2904
- Leishmania mexicana MHOM GT 2001 U1103
- Leishmania major
- Leishmania donovani
- Leishmania infantum JPCM5
- Entamoeba histolytica
- Entamoeba dispar SAW760
- Dicystostellum discoideum
- Dicystostellum purpureum
- Trichomonas vaginalis G3
- Trichomonas vaginalis
- Naegleria gruberi
- Giardia lamblia ATCC 50803

- OG presence
- OG absence
- Inferred root

Dscore = 0.833  
Pvalue = 1.32e-04  
AdjPvalue = 1.57e-02

# NOG13193

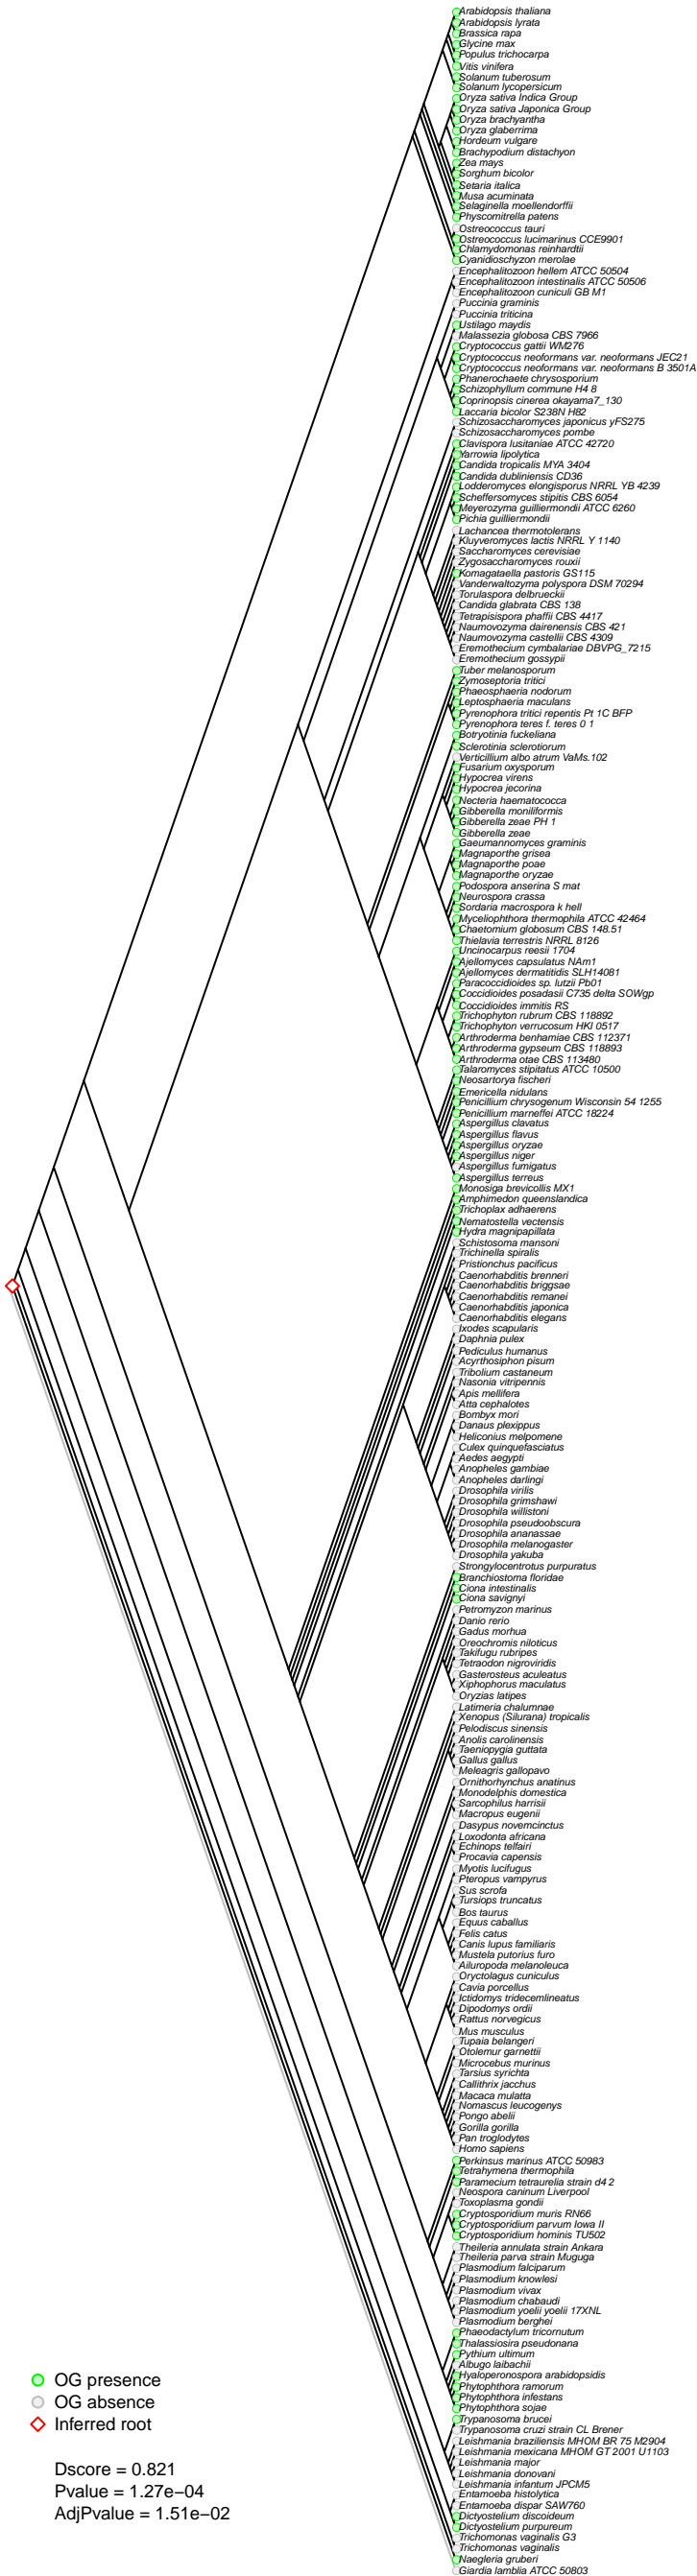

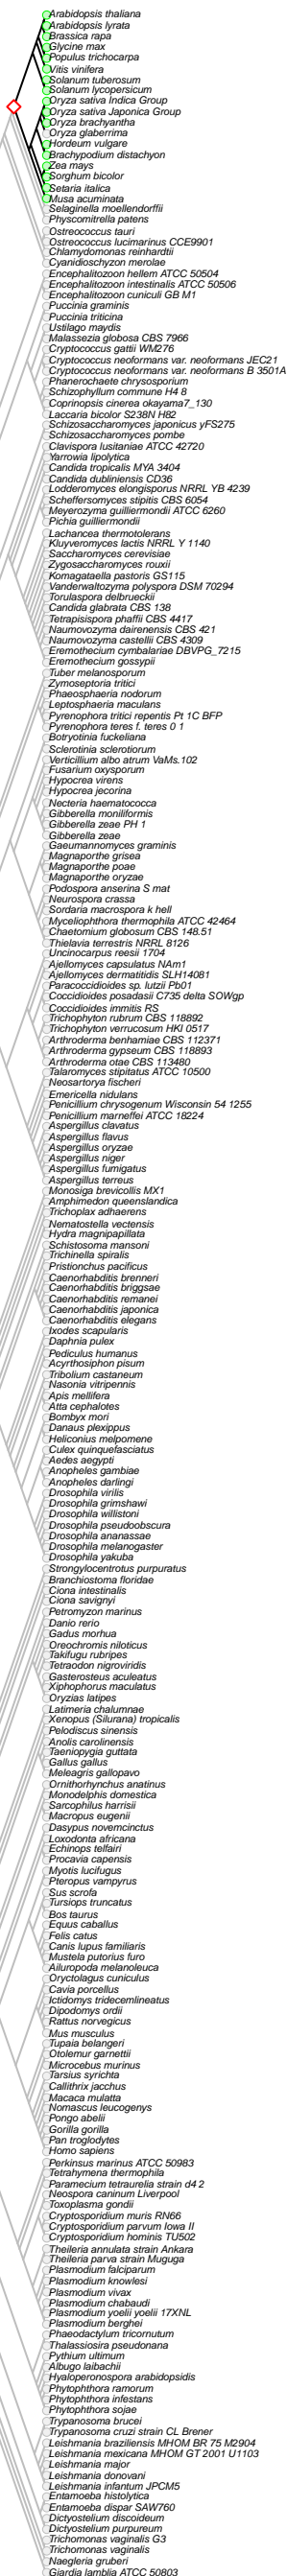

● OG presence  
 ○ OG absence  
 ◆ Inferred root

Dscore = 0.992  
 Pvalue = 4.80e-06  
 AdjPvalue = 5.71e-04

# NOG135096

- Arabis thaliana
- Arabidopsis lyrata
- Brassica rapa
- Glycine max
- Populus trichocarpa
- Vitis vinifera
- Solanum tuberosum
- Solanum lycopersicum
- Oryza sativa Indica Group
- Oryza sativa Japonica Group
- Oryza brachyantha
- Oryza glaberrima
- Hordeum vulgare
- Brachypodium distachyon
- Zea mays
- Sorghum bicolor
- Setaria italica
- Musa acuminata
- Selaginella moellendorffii
- Physcomitrella patens
- Ostreococcus tauri
- Ostreococcus lucimarinus CCE9901
- Chlamydomonas reinhardtii
- Cyanidioschyzon merolae
- Encephalitozoon hellem ATCC 50504
- Encephalitozoon intestinalis ATCC 50506
- Encephalitozoon cuniculi GB M1
- Puccinia graminis
- Puccinia triticina
- Ustilago maydis
- Melassezia globosa CBS 7966
- Cryptococcus gattii WM276
- Cryptococcus neoformans var. neoformans JEC21
- Cryptococcus neoformans var. neoformans B 3501A
- Phanerochaete chrysosporium
- Schizophyllum commune H4 B
- Coprinopsis cinerea okayama7\_130
- Laccaria bicolor S238N H82
- Schizosaccharomyces japonicus yFS275
- Schizosaccharomyces pombe
- Clavospora lusitanae ATCC 42720
- Yarrowia lipolytica
- Candida tropicalis MYA 3404
- Candida dubliniensis CD36
- Lodderomyces elongisporus NRRL YB 4239
- Scheffersomyces stipitis CBS 6054
- Meyerozyma guilliermondii ATCC 6260
- Pichia guilliermondii
- Lachancea thermotolerans
- Kluyveromyces fragilis NRRL Y 1140
- Saccharomyces cerevisiae
- Zygosaccharomyces rouxii
- Komagataella pastoris GS115
- Vanderwaltozyma polyspora DSM 70294
- Torulopsis delbrueckii
- Candida glabrata CBS 138
- Tetrapispora phaffii CBS 4417
- Naumovozyma dairensis CBS 421
- Naumovozyma castellii CBS 4309
- Eremothecium cymbalariae DBVPG\_7215
- Eremothecium gossypii
- Tuber melanosporum
- Zymoseptoria tritici
- Phaeosphaeria nodorum
- Leptosphaeria maculans
- Pyrenophora tritici repens Pt 1C BFP
- Pyrenophora teres f. teres 0 1
- Botryotinia fuckeliana
- Sclerotinia sclerotiorum
- Verticillium albo atrum VaMs.102
- Fusarium oxysporum
- Hypocrea virens
- Hypocrea jecorina
- Nectria haematococca
- Gibberella moniliformis
- Gibberella zeae PH 1
- Gibberella zeae
- Gaeumannomyces graminis
- Magnaporthe grisea
- Magnaporthe poae
- Magnaporthe oryzae
- Podospira anserina S mat
- Neurospora crassa
- Sordaria macrospora k hell
- Myceliophthora thermophila ATCC 42464
- Chaetomium globosum CBS 148.51
- Thielavia terrestris NRRL 8126
- Uncinocarpus reesii 1704
- Ajellomyces capsulatus Nam1
- Ajellomyces dermatitidis SLH14081
- Paracoccidioides sp. lutzi Fb01
- Coccidioides posadasii C735 delta SOWgp
- Coccidioides immitis RS
- Trichophyton rubrum CBS 118892
- Trichophyton verrucosum HKI 0517
- Arthroderma benhamiae CBS 112371
- Arthroderma gypseum CBS 118893
- Arthroderma otae CBS 113480
- Talaromyces stipitatus ATCC 10500
- Neosartorya fischeri
- Emericella nidulans
- Penicillium chrysogenum Wisconsin 54 1255
- Penicillium marneffei ATCC 18224
- Aspergillus clavatus
- Aspergillus flavus
- Aspergillus oryzae
- Aspergillus niger
- Aspergillus fumigatus
- Aspergillus terreus
- Monosiga brevicollis MX1
- Amphimedon queenslandica
- Trichoplax adhaerens
- Nematostella vectensis
- Hydra magnipapillata
- Schistosoma mansoni
- Trichiella spiralis
- Pristionchus pacificus
- Caenorhabditis breneri
- Caenorhabditis briggsae
- Caenorhabditis remanei
- Caenorhabditis japonica
- Caenorhabditis elegans
- Ixodes scapularis
- Daphnia pulex
- Pediculus humanus
- Acyrtosiphon pisum
- Tribolium castaneum
- Nasonia vitripennis
- Apis mellifera
- Atta cephalotes
- Bombyx mori
- Danaus plexippus
- Heliconius melpomene
- Culex quinquefasciatus
- Aedes aegypti
- Anopheles gambiae
- Anopheles darlingi
- Drosophila virilis
- Drosophila grimshawi
- Drosophila willistoni
- Drosophila pseudoobscura
- Drosophila ananassae
- Drosophila melanogaster
- Drosophila yakuba
- Strongylocentrotus purpuratus
- Branchiostoma floridae
- Ciona intestinalis
- Ciona savignyi
- Petromyzon marinus
- Danio rerio
- Gadus morhua
- Oreochromis niloticus
- Takifugu rubripes
- Tetraodon nigroviridis
- Gasterosteus aculeatus
- Xiphophorus maculatus
- Oryzias latipes
- Latimeria chalumnae
- Xenopus (Silurana) tropicalis
- Pelodiscus sinensis
- Anolis carolinensis
- Taeniopygia guttata
- Gallus gallus
- Meleagris gallopavo
- Ornithorhynchus anatinus
- Monodelphis domestica
- Sarcophilus harrisii
- Macropus eugenii
- Dasyurus novemcinctus
- Loxodonta africana
- Echinosorex tillarii
- Procavia capensis
- Myotis lucifugus
- Pteropus vampyrus
- Sus scrofa
- Tursiops truncatus
- Bos taurus
- Equus caballus
- Felis catus
- Canis lupus familiaris
- Mustela putorius furo
- Alluropoda melanoleuca
- Cryptolestes cuniculus
- Cavia porcellus
- Ictidomys tridecemlineatus
- Dipodomys ordii
- Rattus norvegicus
- Mus musculus
- Tupaia belangeri
- Otolomus garretti
- Microcebus murinus
- Tarsius syrichta
- Callithrix jacchus
- Macaca mulatta
- Nomascus leucogenys
- Pongo abelii
- Gorilla gorilla
- Pan troglodytes
- Homo sapiens
- Perkinsus marinus ATCC 50983
- Tetrahymena thermophila
- Paramecium tetraurelia strain d4 2
- Neospora caninum Liverpool
- Toxoplasma gondii
- Cryptosporidium muris RN66
- Cryptosporidium parvum Iowa II
- Cryptosporidium hominis TU502
- Theileria annulata strain Ankara
- Theileria parva strain Muguga
- Plasmodium falciparum
- Plasmodium knowlesi
- Plasmodium vivax
- Plasmodium chabaudi
- Plasmodium yoelii yoelii 17XNL
- Plasmodium berghei
- Phaeodactylum tricornutum
- Thalassiosira pseudonana
- Pythium ultimum
- Albugo liliaceae
- Hyaloperonospora arabidopsidis
- Phytophthora ramorum
- Phytophthora infestans
- Phytophthora sojae
- Trypanosoma brucei
- Trypanosoma cruzi strain CL Brener
- Leishmania braziliensis MHOM BR 75 M2904
- Leishmania mexicana MHOM GT 2001 U1103
- Leishmania major
- Leishmania donovani
- Leishmania infantum JPCM5
- Entamoeba histolytica
- Entamoeba dispar SAW760
- Dicystostellum discoideum
- Dicystostellum purpureum
- Trichomonas vaginalis G3
- Trichomonas vaginalis
- Naegleria gruberi
- Giardia lamblia ATCC 50803

- OG presence
- OG absence
- Inferred root

Dscore = 0.988

Pvalue = 2.02e-05

AdjPvalue = 2.40e-03

- Arabis thaliana
- Arabidopsis lyrata
- Brassica rapa
- Glycine max
- Populus trichocarpa
- Vitis vinifera
- Solanum tuberosum
- Solanum lycopersicum
- Oryza sativa Indica Group
- Oryza sativa Japonica Group
- Oryza brachyantha
- Oryza glaberrima
- Hordeum vulgare
- Brachypodium distachyon
- Zea mays
- Sorghum bicolor
- Setaria italica
- Musa acuminata
- Selaginella moellendorffii
- Physcomitrella patens
- Ostreococcus tauri
- Ostreococcus lucimarinus CCE9901
- Chlamydomonas reinhardtii
- Cyanidioschyzon merolae
- Encephalitozoon hellem ATCC 50504
- Encephalitozoon intestinalis ATCC 50506
- Encephalitozoon cuniculi GB M1
- Puccinia graminis
- Puccinia triticina
- Ustilago maydis
- Melassezia globosa CBS 7966
- Cryptococcus gattii WM276
- Cryptococcus neoformans var. neoformans JEC21
- Cryptococcus neoformans var. neoformans B 3501A
- Phanerochaete chrysosporium
- Schizophyllum commune H4 B
- Coprinopsis cinerea okayama7\_130
- Laccaria bicolor S238N H82
- Schizosaccharomyces japonicus yFS275
- Schizosaccharomyces pombe
- Clavospora lusitanae ATCC 42720
- Yarrowia lipolytica
- Candida tropicalis MYA 3404
- Candida dubliniensis CD36
- Lodderomyces elongisporus NRRL YB 4239
- Scheffersomyces stipitis CBS 6054
- Meyerozyma guilliermondii ATCC 6260
- Pichia guilliermondii
- Lachancea thermotolerans
- Kluyveromyces fragilis NRRL Y 1140
- Saccharomyces cerevisiae
- Zygosaccharomyces rouxii
- Komagataella pastoris GS115
- Vanderwaltozyma polyspora DSM 70294
- Torulopsis delbrueckii
- Candida glabrata CBS 138
- Tetrapispora phaffii CBS 4417
- Naumovozyma dairensis CBS 421
- Naumovozyma castellii CBS 4309
- Eremothecium cymbalariae DBVPG\_7215
- Eremothecium gossypii
- Tuber melanosporum
- Zymoseptoria tritici
- Phaeosphaeria nodorum
- Leptosphaeria maculans
- Pyrenophora tritici repens Pt 1C BFP
- Pyrenophora teres f. teres 0 1
- Botryotinia fuckeliana
- Sclerotinia sclerotiorum
- Verticillium albo atrum VaMs.102
- Fusarium oxysporum
- Hypocrea virens
- Hypocrea jecorina
- Nectria haematococca
- Gibberella moniliformis
- Gibberella zeae PH 1
- Gibberella zeae
- Gaeumannomyces graminis
- Magnaporthe grisea
- Magnaporthe poae
- Magnaporthe oryzae
- Podospira anserina S mat
- Neurospora crassa
- Sordaria macrospora k hell
- Myceliophthora thermophila ATCC 42464
- Chaetomium globosum CBS 148.51
- Thielavia terrestris NRRL 8126
- Uncinocarpus reesii 1704
- Ajellomyces capsulatus Nam1
- Ajellomyces dermatitidis SLH14081
- Paracoccidioides sp. lutzi Fb01
- Coccidioides posadasii C735 delta SOWgp
- Coccidioides immitis RS
- Trichophyton rubrum CBS 118892
- Trichophyton verrucosum HKI 0517
- Arthroderma benhamiae CBS 112371
- Arthroderma gypseum CBS 118893
- Arthroderma otae CBS 113480
- Talaromyces stipitatus ATCC 10500
- Neosartorya fischeri
- Emericella nidulans
- Penicillium chrysogenum Wisconsin 54 1255
- Penicillium marneffei ATCC 18224
- Aspergillus clavatus
- Aspergillus flavus
- Aspergillus oryzae
- Aspergillus niger
- Aspergillus fumigatus
- Aspergillus terreus
- Monosiga brevicollis MX1
- Amphimedon queenslandica
- Trichoplax adhaerens
- Nematostella vectensis
- Hydra magnipapillata
- Schistosoma mansoni
- Trichinella spiralis
- Pristionchus pacificus
- Caenorhabditis brenneri
- Caenorhabditis briggsae
- Caenorhabditis remanei
- Caenorhabditis japonica
- Caenorhabditis elegans
- Ixodes scapularis
- Daphnia pulex
- Pediculus humanus
- Acyrtosiphon pisum
- Tribolium castaneum
- Nasonia vitripennis
- Apis mellifera
- Atta cephalotes
- Bombyx mori
- Danaus plexippus
- Heliconia melpomene
- Culex quinquefasciatus
- Aedes aegypti
- Anopheles gambiae
- Anopheles darlingi
- Drosophila virilis
- Drosophila grimshawi
- Drosophila willistoni
- Drosophila pseudoobscura
- Drosophila ananassae
- Drosophila melanogaster
- Drosophila yakuba
- Strongylocentrotus purpuratus
- Branchiostoma floridae
- Ciona intestinalis
- Ciona savignyi
- Petromyzon marinus
- Danio rerio
- Gadus morhua
- Oreochromis niloticus
- Takifugu rubripes
- Tetraodon nigroviridis
- Gasterosteus aculeatus
- Xiphophorus maculatus
- Oryzias latipes
- Latimeria chalumnae
- Xenopus (Silurana) tropicalis
- Pelodiscus sinensis
- Anolis carolinensis
- Taeniopygia guttata
- Gallus gallus
- Meleagris gallopavo
- Ornithorhynchus anatinus
- Monodelphis domestica
- Sarcophilus harrisii
- Macropus eugenii
- Dasyurus novemcinctus
- Loxodonta africana
- Echinops telillari
- Procavia capensis
- Myotis lucifugus
- Pteropus vampyrus
- Sus scrofa
- Tursiops truncatus
- Bos taurus
- Equus caballus
- Felis catus
- Canis lupus familiaris
- Mustela putorius furo
- Alluropoda melanoleuca
- Cryptolestes cuniculus
- Cavia porcellus
- Ictidomys tridecemlineatus
- Dipodomys ordii
- Rattus norvegicus
- Mus musculus
- Tupaia belangeri
- Otolomus garretti
- Microcebus murinus
- Tarsius syrichta
- Callithrix jacchus
- Macaca mulatta
- Nomascus leucogenys
- Pongo abelii
- Gorilla gorilla
- Pan troglodytes
- Homo sapiens
- Perkinsus marinus ATCC 50983
- Tetrahymena thermophila
- Paramecium tetraurelia strain d4 2
- Neospora caninum Liverpool
- Toxoplasma gondii
- Cryptosporidium muris RN66
- Cryptosporidium parvum Iowa II
- Cryptosporidium hominis TU502
- Theileria annulata strain Ankara
- Theileria parva strain Muguga
- Plasmodium falciparum
- Plasmodium knowlesi
- Plasmodium vivax
- Plasmodium chabaudi
- Plasmodium yoelii yoelii 17XNL
- Plasmodium berghei
- Phaeodactylum tricornutum
- Thalassiosira pseudonana
- Pythium ultimum
- Albugo liliaceae
- Hyaloperonospora arabidopsidis
- Phytophthora ramorum
- Phytophthora infestans
- Phytophthora sojae
- Trypanosoma brucei
- Trypanosoma cruzi strain CL Brener
- Leishmania braziliensis MHOM BR 75 M2904
- Leishmania mexicana MHOM GT 2001 U1103
- Leishmania major
- Leishmania donovani
- Leishmania infantum JPCM5
- Entamoeba histolytica
- Entamoeba dispar SAW760
- Dicystostellum discoideum
- Dicystostellum purpureum
- Trichomonas vaginalis G3
- Trichomonas vaginalis
- Naegleria gruberi
- Giardia lamblia ATCC 50803

- OG presence
- OG absence
- Inferred root

Dscore = 0.986  
Pvalue = 1.53e-05  
AdjPvalue = 1.82e-03

- Arabis thaliana
- Arabidopsis lyrata
- Brassica rapa
- Glycine max
- Populus trichocarpa
- Vitis vinifera
- Solanum tuberosum
- Solanum lycopersicum
- Oryza sativa Indica Group
- Oryza sativa Japonica Group
- Oryza brachyantha
- Oryza glaberrima
- Hordeum vulgare
- Brachypodium distachyon
- Zea mays
- Sorghum bicolor
- Setaria italica
- Musa acuminata
- Selaginella moellendorffii
- Physcomitrella patens
- Ostreococcus tauri
- Ostreococcus lucimarinus CCE9901
- Chlamydomonas reinhardtii
- Cyanidioschyzon merolae
- Encephalitozoon hellem ATCC 50504
- Encephalitozoon intestinalis ATCC 50506
- Encephalitozoon cuniculi GB M1
- Puccinia graminis
- Puccinia triticina
- Ustilago maydis
- Melassezia globosa CBS 7966
- Cryptococcus gattii WM276
- Cryptococcus neoformans var. neoformans JEC21
- Cryptococcus neoformans var. neoformans B 3501A
- Phanerochaete chrysosporium
- Schizophyllum commune H4 B
- Coprinopsis cinerea okayama7\_130
- Laccaria bicolor S238N H82
- Schizosaccharomyces japonicus yFS275
- Schizosaccharomyces pombe
- Clavospora lusitanae ATCC 42720
- Yarrowia lipolytica
- Candida tropicalis MYA 3404
- Candida dubliniensis CD36
- Lodderomyces elongisporus NRRL YB 4239
- Scheffersomyces stipitis CBS 6054
- Meyerozyma guilliermondii ATCC 6260
- Pichia guilliermondii
- Lachancea thermotolerans
- Kluyveromyces fragilis NRRL Y 1140
- Saccharomyces cerevisiae
- Zygosaccharomyces rouxii
- Komagataella pastoris GS115
- Vanderwaltozyma polyspora DSM 70294
- Torulopsis delbrueckii
- Candida glabrata CBS 138
- Tetrapispora phaffii CBS 4417
- Naumovozyma dairensis CBS 421
- Naumovozyma castellii CBS 4309
- Eremothecium cymbalariae DBVPG\_7215
- Eremothecium gossypii
- Tuber melanosporum
- Zymoseptoria tritici
- Phaeosphaeria nodorum
- Leptosphaeria maculans
- Pyrenophora tritici repens Pt 1C BFP
- Pyrenophora teres f. teres 0 1
- Botryotinia fuckeliana
- Sclerotinia sclerotiorum
- Verticillium albo atrum VaMs.102
- Fusarium oxysporum
- Hypocrea virens
- Hypocrea jecorina
- Nectria haematococca
- Gibberella moniliformis
- Gibberella zeae PH 1
- Gibberella zeae
- Gaeumannomyces graminis
- Magnaporthe grisea
- Magnaporthe poae
- Magnaporthe oryzae
- Podospira anserina S mat
- Neurospora crassa
- Sordaria macrospora k hell
- Myceliophthora thermophila ATCC 42464
- Chaetomium globosum CBS 148.51
- Thielavia terrestris NRRL 8126
- Uncinocarpus reesii 1704
- Ajellomyces capsulatus Nam1
- Ajellomyces dermatitidis SLH14081
- Paracoccidioides sp. lutzi Fb01
- Coccidioides posadasii C735 delta SOWgp
- Coccidioides immitis RS
- Trichophyton rubrum CBS 118892
- Trichophyton verrucosum HKI 0517
- Arthroderma benhamiae CBS 112371
- Arthroderma gypseum CBS 118893
- Arthroderma otae CBS 113480
- Talaromyces stipitatus ATCC 10500
- Neosartorya fischeri
- Emericella nidulans
- Penicillium chrysogenum Wisconsin 54 1255
- Penicillium marneffei ATCC 18224
- Aspergillus clavatus
- Aspergillus flavus
- Aspergillus oryzae
- Aspergillus niger
- Aspergillus fumigatus
- Aspergillus terreus
- Monosiga brevicollis MX1
- Amphimedon queenslandica
- Trichoplax adhaerens
- Nematostella vectensis
- Hydra magnipapillata
- Schistosoma mansoni
- Trichinella spiralis
- Pristionchus pacificus
- Caenorhabditis breneri
- Caenorhabditis briggsae
- Caenorhabditis remanei
- Caenorhabditis japonica
- Caenorhabditis elegans
- Ixodes scapularis
- Daphnia pulex
- Pediculus humanus
- Acyrtosiphon pisum
- Tribolium castaneum
- Nasonia vitripennis
- Apis mellifera
- Atta cephalotes
- Bombyx mori
- Danaus plexippus
- Heliconius melpomene
- Culex quinquefasciatus
- Aedes aegypti
- Anopheles gambiae
- Anopheles darlingi
- Drosophila virilis
- Drosophila grimshawi
- Drosophila willistoni
- Drosophila pseudoobscura
- Drosophila ananassae
- Drosophila melanogaster
- Drosophila yakuba
- Strongylocentrotus purpuratus
- Branchiostoma floridae
- Ciona intestinalis
- Ciona savignyi
- Petromyzon marinus
- Danio rerio
- Gadus morhua
- Oreochromis niloticus
- Takifugu rubripes
- Tetraodon nigroviridis
- Gasterosteus aculeatus
- Xiphophorus maculatus
- Oryzias latipes
- Latimeria chalumnae
- Xenopus (Silurana) tropicalis
- Pelodiscus sinensis
- Anolis carolinensis
- Taeniopygia guttata
- Gallus gallus
- Meleagris gallopavo
- Ornithorhynchus anatinus
- Monodelphis domestica
- Sarcophilus harrisii
- Macropus eugenii
- Dasyurus novemcinctus
- Loxodonta africana
- Echinops telillari
- Procavia capensis
- Myotis lucifugus
- Pteropus vampyrus
- Sus scrofa
- Tursiops truncatus
- Bos taurus
- Equus caballus
- Felis catus
- Canis lupus familiaris
- Mustela putorius furo
- Alluropoda melanoleuca
- Cryptolestes cuniculus
- Cavia porcellus
- Ictidomys tridecemlineatus
- Dipodomys ordii
- Rattus norvegicus
- Mus musculus
- Tupaia belangeri
- Otolomus garrettii
- Microcebus murinus
- Tarsius syrichta
- Callithrix jacchus
- Macaca mulatta
- Nomascus leucogenys
- Pongo abelii
- Gorilla gorilla
- Pan troglodytes
- Homo sapiens
- Perkinsus marinus ATCC 50983
- Tetrahymena thermophila
- Paramecium tetraurelia strain d4 2
- Neospora caninum Liverpool
- Toxoplasma gondii
- Cryptosporidium muris RN66
- Cryptosporidium parvum Iowa II
- Cryptosporidium hominis TU502
- Theileria annulata strain Ankara
- Theileria parva strain Muguga
- Plasmodium falciparum
- Plasmodium knowlesi
- Plasmodium vivax
- Plasmodium chabaudi
- Plasmodium yoelii yoelii 17XNL
- Plasmodium berghei
- Phaeodactylum tricornutum
- Thalassiosira pseudonana
- Pythium ultimum
- Albugo liliaceae
- Hyaloperonospora arabidopsidis
- Phytophthora ramorum
- Phytophthora infestans
- Phytophthora sojae
- Trypanosoma brucei
- Trypanosoma cruzi strain CL Brener
- Leishmania braziliensis MHOM BR 75 M2904
- Leishmania mexicana MHOM GT 2001 U1103
- Leishmania major
- Leishmania donovani
- Leishmania infantum JPCM5
- Entamoeba histolytica
- Entamoeba dispar SAW760
- Dicystostellum discoideum
- Dicystostellum purpureum
- Trichomonas vaginalis G3
- Trichomonas vaginalis
- Naegleria gruberi
- Giardia lamblia ATCC 50803

- OG presence
- OG absence
- Inferred root

Dscore = 0.889  
Pvalue = 1.58e-04  
AdjPvalue = 1.88e-02



- Arabis thaliana
- Arabidopsis lyrata
- Brassica rapa
- Glycine max
- Populus trichocarpa
- Vitis vinifera
- Solanum tuberosum
- Solanum lycopersicum
- Oryza sativa Indica Group
- Oryza sativa Japonica Group
- Oryza brachyantha
- Oryza glaberrima
- Hordeum vulgare
- Brachypodium distachyon
- Zea mays
- Sorghum bicolor
- Setaria italica
- Musa acuminata
- Selaginella moellendorffii
- Physcomitrella patens
- Ostreococcus tauri
- Ostreococcus lucimarinus CCE9901
- Chlamydomonas reinhardtii
- Cyanidioschyzon merolae
- Encephalitozoon hellem ATCC 50504
- Encephalitozoon intestinalis ATCC 50506
- Encephalitozoon cuniculi GB M1
- Puccinia graminis
- Puccinia triticina
- Ustilago maydis
- Melassezia globosa CBS 7966
- Cryptococcus gattii WM276
- Cryptococcus neoformans var. neoformans JEC21
- Cryptococcus neoformans var. neoformans B 3501A
- Phanerochaete chrysosporium
- Schizophyllum commune H4 B
- Coprinopsis cinerea okayama7\_130
- Laccaria bicolor S238N H82
- Schizosaccharomyces japonicus yFS275
- Schizosaccharomyces pombe
- Clavospora lusitanae ATCC 42720
- Yarrowia lipolytica
- Candida tropicalis MYA 3404
- Candida dubliniensis CD36
- Lodderomyces elongisporus NRRL YB 4239
- Scheffersomyces stipitis CBS 6054
- Meyerozyma guilliermondii ATCC 6260
- Pichia guilliermondii
- Lachancea thermotolerans
- Kluyveromyces fragilis NRRL Y 1140
- Saccharomyces cerevisiae
- Zygosaccharomyces rouxii
- Komagataella pastoris GS115
- Vanderwaltozyma polyspora DSM 70294
- Torulopsis delbrueckii
- Candida glabrata CBS 138
- Tetrapispora phaffii CBS 4417
- Naumovozyma dairensis CBS 421
- Naumovozyma castellii CBS 4309
- Eremothecium cymbalariae DBVPG\_7215
- Eremothecium gossypii
- Tuber melanosporum
- Zymoseptoria tritici
- Phaeosphaeria nodorum
- Leptosphaeria maculans
- Pyrenophora tritici repens Pt 1C BFP
- Pyrenophora teres f. teres 0 1
- Botryotinia fuckeliana
- Sclerotinia sclerotiorum
- Verticillium albo atrum VaMs.102
- Fusarium oxysporum
- Hypocrea virens
- Hypocrea jecorina
- Nectria haematococca
- Gibberella moniliformis
- Gibberella zeae PH 1
- Gibberella zeae
- Gaeumannomyces graminis
- Magnaporthe grisea
- Magnaporthe poae
- Magnaporthe oryzae
- Podospira anserina S mat
- Neurospora crassa
- Sordaria macrospora k hell
- Myceliophthora thermophila ATCC 42464
- Chaetomium globosum CBS 148.51
- Thielavia terrestris NRRL 8126
- Uncinocarpus reesii 1704
- Ajellomyces capsulatus Nam1
- Ajellomyces dermatitidis SLH14081
- Paracoccidioides sp. lutzi Fb01
- Coccidioides posadasii C735 delta SOWgp
- Coccidioides immitis RS
- Trichophyton rubrum CBS 118892
- Trichophyton verrucosum HKI 0517
- Arthroderma benhamiae CBS 112371
- Arthroderma gypseum CBS 118893
- Arthroderma otae CBS 113480
- Talaromyces stipitatus ATCC 10500
- Neosartorya fischeri
- Emericella nidulans
- Penicillium chrysogenum Wisconsin 54 1255
- Penicillium marneffei ATCC 18224
- Aspergillus clavatus
- Aspergillus flavus
- Aspergillus oryzae
- Aspergillus niger
- Aspergillus fumigatus
- Aspergillus terreus
- Monosiga brevicollis MX1
- Amphimedon queenslandica
- Trichoplax adhaerens
- Nematostella vectensis
- Hydra magnipapillata
- Schistosoma mansoni
- Trichiella spiralis
- Pristionchus pacificus
- Caenorhabditis breneri
- Caenorhabditis briggsae
- Caenorhabditis remanei
- Caenorhabditis japonica
- Caenorhabditis elegans
- Ixodes scapularis
- Daphnia pulex
- Pediculus humanus
- Acyrtosiphon pisum
- Tribolium castaneum
- Nasonia vitripennis
- Apis mellifera
- Atta cephalotes
- Bombyx mori
- Danaus plexippus
- Heliconia melpomene
- Culex quinquefasciatus
- Aedes aegypti
- Anopheles gambiae
- Anopheles darlingi
- Drosophila virilis
- Drosophila grimshawi
- Drosophila willistoni
- Drosophila pseudoobscura
- Drosophila ananassae
- Drosophila melanogaster
- Drosophila yakuba
- Strongylocentrotus purpuratus
- Branchiostoma floridae
- Ciona intestinalis
- Ciona savignyi
- Petromyzon marinus
- Danio rerio
- Gadus morhua
- Oreochromis niloticus
- Takifugu rubripes
- Tetraodon nigroviridis
- Gasterosteus aculeatus
- Xiphophorus maculatus
- Oryzias latipes
- Latimeria chalumnae
- Xenopus (Silurana) tropicalis
- Pelodiscus sinensis
- Anolis carolinensis
- Taeniopygia guttata
- Gallus gallus
- Meleagris gallopavo
- Ornithorhynchus anatinus
- Monodelphis domestica
- Sarcophilus harrisii
- Macropus eugenii
- Dasyurus novemcinctus
- Loxodonta africana
- Echinops telfairii
- Procavia capensis
- Myotis lucifugus
- Pteropus vampyrus
- Sus scrofa
- Tursiops truncatus
- Bos taurus
- Equus caballus
- Felis catus
- Canis lupus familiaris
- Mustela putorius furo
- Alluropoda melanoleuca
- Cryptolepis cuniculus
- Cavia porcellus
- Ictidomys tridecemlineatus
- Dipodomys ordii
- Rattus norvegicus
- Mus musculus
- Tupaia belangeri
- Otolemur garrettii
- Microcebus murinus
- Tarsius syrichta
- Callithrix jacchus
- Macaca mulatta
- Nomascus leucogenys
- Pongo abelii
- Gorilla gorilla
- Pan troglodytes
- Homo sapiens
- Perkinsus marinus ATCC 50983
- Tetrahymena thermophila
- Paramecium tetraurelia strain d4 2
- Neospora caninum Liverpool
- Toxoplasma gondii
- Cryptosporidium muris RN66
- Cryptosporidium parvum Iowa II
- Cryptosporidium hominis TU502
- Theileria annulata strain Ankara
- Theileria parva strain Muguga
- Plasmodium falciparum
- Plasmodium knowlesi
- Plasmodium vivax
- Plasmodium chabaudi
- Plasmodium yoelii yoelii 17XNL
- Plasmodium berghei
- Phaeodactylum tricornutum
- Thalassiosira pseudonana
- Pythium ultimum
- Albugo liliaceae
- Hyaloperonospora arabidopsidis
- Phytophthora ramorum
- Phytophthora infestans
- Phytophthora sojae
- Trypanosoma brucei
- Trypanosoma cruzi strain CL Brener
- Leishmania braziliensis MHOM BR 75 M2904
- Leishmania mexicana MHOM GT 2001 U1103
- Leishmania major
- Leishmania donovani
- Leishmania infantum JPCM5
- Entamoeba histolytica
- Entamoeba dispar SAW760
- Dicystostellum discoideum
- Dicystostellum purpureum
- Trichomonas vaginalis G3
- Trichomonas vaginalis
- Naegleria gruberi
- Giardia lamblia ATCC 50803

- OG presence
- OG absence
- Inferred root

Dscore = 1  
Pvalue = 8.71e-06  
AdjPvalue = 1.04e-03

- Arabis thaliana
- Arabidopsis lyrata
- Brassica rapa
- Glycine max
- Populus trichocarpa
- Vitis vinifera
- Solanum tuberosum
- Solanum lycopersicum
- Oryza sativa Indica Group
- Oryza sativa Japonica Group
- Oryza brachyantha
- Oryza glaberrima
- Hordeum vulgare
- Brachypodium distachyon
- Zea mays
- Sorghum bicolor
- Setaria italica
- Musa acuminata
- Selaginella moellendorffii
- Physcomitrella patens
- Ostreococcus tauri
- Ostreococcus lucimarinus CCE9901
- Chlamydomonas reinhardtii
- Cyanidioschyzon merolae
- Encephalitozoon hellem ATCC 50504
- Encephalitozoon intestinalis ATCC 50506
- Encephalitozoon cuniculi GB M1
- Puccinia graminis
- Puccinia triticina
- Ustilago maydis
- Malassezia globosa CBS 7966
- Cryptococcus gattii WM276
- Cryptococcus neoformans var. neoformans JEC21
- Cryptococcus neoformans var. neoformans B 3501A
- Phanerochaete chrysosporium
- Schizophyllum commune H4 B
- Coprinopsis cinerea okayama7\_130
- Laccaria bicolor S238N H82
- Schizosaccharomyces japonicus yFS275
- Schizosaccharomyces pombe
- Clavospora lusitanae ATCC 42720
- Yarrowia lipolytica
- Candida tropicalis MYA 3404
- Candida dubliniensis CD36
- Lodderomyces elongisporus NRRL YB 4239
- Scheffersomyces stipitis CBS 6054
- Meyerozyma guilliermondii ATCC 6260
- Pichia guilliermondii
- Lachancea thermotolerans
- Kluyveromyces fragilis NRRL Y 1140
- Saccharomyces cerevisiae
- Zygosaccharomyces rouxii
- Komagataella pastoris GS115
- Vanderwaltozyma polyspora DSM 70294
- Torulopsis delbrueckii
- Candida glabrata CBS 138
- Tetrapispora phaffii CBS 4417
- Naumovozyma dairensis CBS 421
- Naumovozyma castellii CBS 4309
- Eremothecium cymbalariae DBVPG\_7215
- Eremothecium gossypii
- Tuber melanosporum
- Zymoseptoria tritici
- Phaeosphaeria nodorum
- Leptosphaeria maculans
- Pyrenophora tritici repens Pt 1C BFP
- Pyrenophora teres f. teres 0 1
- Botryotinia fuckeliana
- Sclerotinia sclerotiorum
- Verticillium albo atrum VaMs.102
- Fusarium oxysporum
- Hypocrea virens
- Hypocrea jecorina
- Nectria haematococca
- Gibberella moniliformis
- Gibberella zeae PH 1
- Gibberella zeae
- Gaeumannomyces graminis
- Magnaporthe grisea
- Magnaporthe poae
- Magnaporthe oryzae
- Podospira anserina S mat
- Neurospora crassa
- Sordaria macrospora k hell
- Myceliophthora thermophila ATCC 42464
- Chaetomium globosum CBS 148.51
- Thielavia terrestris NRRL 8126
- Uncinocarpus reesii 1704
- Ajellomyces capsulatus Nam1
- Ajellomyces dermatitidis SLH14081
- Paracoccidioides sp. lutzi Fb01
- Coccidioides posadasii C735 delta SOWgp
- Coccidioides immitis RS
- Trichophyton rubrum CBS 118892
- Trichophyton verrucosum HKI 0517
- Arthroderma benhamiae CBS 112371
- Arthroderma gypseum CBS 118893
- Arthroderma otae CBS 113480
- Talaromyces stipitatus ATCC 10500
- Neosartorya fischeri
- Emericella nidulans
- Penicillium chrysogenum Wisconsin 54 1255
- Penicillium marneffei ATCC 18224
- Aspergillus clavatus
- Aspergillus flavus
- Aspergillus oryzae
- Aspergillus niger
- Aspergillus fumigatus
- Aspergillus terreus
- Monosiga brevicollis MX1
- Amphimedon queenslandica
- Trichoplax adhaerens
- Nematostella vectensis
- Hydra magnipapillata
- Schistosoma mansoni
- Trichinella spiralis
- Pristionchus pacificus
- Caenorhabditis brenneri
- Caenorhabditis briggsae
- Caenorhabditis remanei
- Caenorhabditis japonica
- Caenorhabditis elegans
- Ixodes scapularis
- Daphnia pulex
- Pediculus humanus
- Acyrtosiphon pisum
- Tribolium castaneum
- Nasonia vitripennis
- Apis mellifera
- Atta cephalotes
- Bombyx mori
- Danaus plexippus
- Heliconia melpomene
- Culex quinquefasciatus
- Aedes aegypti
- Anopheles gambiae
- Anopheles darlingi
- Drosophila virilis
- Drosophila grimshawi
- Drosophila willistoni
- Drosophila pseudoobscura
- Drosophila ananassae
- Drosophila melanogaster
- Drosophila yakuba
- Strongylocentrotus purpuratus
- Branchiostoma floridae
- Ciona intestinalis
- Ciona savignyi
- Petromyzon marinus
- Danio rerio
- Gadus morhua
- Oreochromis niloticus
- Takifugu rubripes
- Tetraodon nigroviridis
- Gasterosteus aculeatus
- Xiphophorus maculatus
- Oryzias latipes
- Latimeria chalumnae
- Xenopus (Silurana) tropicalis
- Pelodiscus sinensis
- Anolis carolinensis
- Taeniopygia guttata
- Gallus gallus
- Meleagris gallopavo
- Ornithorhynchus anatinus
- Monodelphis domestica
- Sarcophilus harrisii
- Macropus eugenii
- Dasyurus novemcinctus
- Loxodonta africana
- Echinops telillari
- Procavia capensis
- Myotis lucifugus
- Pteropus vampyrus
- Sus scrofa
- Tursiops truncatus
- Bos taurus
- Equus caballus
- Felis catus
- Canis lupus familiaris
- Mustela putorius furo
- Alluropoda melanoleuca
- Cryptolestes cuniculus
- Cavia porcellus
- Ictidomys tridecemlineatus
- Dipodomys ordii
- Rattus norvegicus
- Mus musculus
- Tupaia belangeri
- Otolomus garretti
- Microcebus murinus
- Tarsius syrichta
- Callithrix jacchus
- Macaca mulatta
- Nomascus leucogenys
- Pongo abelii
- Gorilla gorilla
- Pan troglodytes
- Homo sapiens
- Perkinsus marinus ATCC 50983
- Tetrahymena thermophila
- Paramecium tetraurelia strain d4 2
- Neospora caninum Liverpool
- Toxoplasma gondii
- Cryptosporidium muris RN66
- Cryptosporidium parvum Iowa II
- Cryptosporidium hominis TU502
- Theileria annulata strain Ankara
- Theileria parva strain Muguga
- Plasmodium falciparum
- Plasmodium knowlesi
- Plasmodium vivax
- Plasmodium chabaudi
- Plasmodium yoelii yoelii 17XNL
- Plasmodium berghei
- Phaeodactylum tricornutum
- Thalassiosira pseudonana
- Pythium ultimum
- Albugo liliaceae
- Hyaloperonospora arabidopsidis
- Phytophthora ramorum
- Phytophthora infestans
- Phytophthora sojae
- Trypanosoma brucei
- Trypanosoma cruzi strain CL Brener
- Leishmania braziliensis MHOM BR 75 M2904
- Leishmania mexicana MHOM GT 2001 U1103
- Leishmania major
- Leishmania donovani
- Leishmania infantum JPCM5
- Entamoeba histolytica
- Entamoeba dispar SAW760
- Dicystostellum discoideum
- Dicystostellum purpureum
- Trichomonas vaginalis G3
- Trichomonas vaginalis
- Naegleria gruberi
- Giardia lamblia ATCC 50803

- OG presence
- OG absence
- Inferred root

Dscore = 0.898  
Pvalue = 1.68e-05  
AdjPvalue = 2.00e-03

- Arabis thaliana
- Arabidopsis lyrata
- Brassica rapa
- Glycine max
- Populus trichocarpa
- Vitis vinifera
- Solanum tuberosum
- Solanum lycopersicum
- Oryza sativa Indica Group
- Oryza sativa Japonica Group
- Oryza brachyantha
- Oryza glaberrima
- Hordeum vulgare
- Brachypodium distachyon
- Zea mays
- Sorghum bicolor
- Setaria italica
- Musa acuminata
- Selaginella moellendorffii
- Physcomitrella patens
- Ostreococcus tauri
- Ostreococcus lucimarinus CCE9901
- Chlamydomonas reinhardtii
- Cyanidioschyzon merolae
- Encephalitozoon hellem ATCC 50504
- Encephalitozoon intestinalis ATCC 50506
- Encephalitozoon cuniculi GB M1
- Puccinia graminis
- Puccinia triticina
- Ustilago maydis
- Malassezia globosa CBS 7966
- Cryptococcus gattii WM276
- Cryptococcus neoformans var. neoformans JEC21
- Cryptococcus neoformans var. neoformans B 3501A
- Phanerochaete chrysosporium
- Schizophyllum commune H4 B
- Coprinopsis cinerea okayama7\_130
- Laccaria bicolor S238N H82
- Schizosaccharomyces japonicus yFS275
- Schizosaccharomyces pombe
- Clavospora lusitanae ATCC 42720
- Yarrowia lipolytica
- Candida tropicalis MYA 3404
- Candida dubliniensis CD36
- Lodderomyces elongisporus NRRL YB 4239
- Scheffersomyces stipitis CBS 6054
- Meyerozyma guilliermondii ATCC 6260
- Pichia guilliermondii
- Lachancea thermotolerans
- Kluyveromyces fragilis NRRL Y 1140
- Saccharomyces cerevisiae
- Zygosaccharomyces rouxii
- Komagataella pastoris GS115
- Vanderwaltozyma polyspora DSM 70294
- Torulopsis delbrueckii
- Candida glabrata CBS 138
- Tetrapisispora phaffii CBS 4417
- Naumovozyma dairensis CBS 421
- Naumovozyma castellii CBS 4309
- Eremothecium cymbalariae DBVPG\_7215
- Eremothecium gossypii
- Tuber melanosporum
- Zymoseptoria tritici
- Phaeosphaeria nodorum
- Leptosphaeria maculans
- Pyrenophora tritici repens Pt 1C BFP
- Pyrenophora teres f. teres 0 1
- Botryotinia fuckeliana
- Sclerotinia sclerotiorum
- Verticillium albo atrum VaMs.102
- Fusarium oxysporum
- Hypocrea virens
- Hypocrea jecorina
- Nectria haematococca
- Gibberella moniliformis
- Gibberella zeae PH 1
- Gibberella zeae
- Gaeumannomyces graminis
- Magnaporthe grisea
- Magnaporthe poae
- Magnaporthe oryzae
- Podospira anserina S mat
- Neurospora crassa
- Sordaria macrospora k hell
- Myceliophthora thermophila ATCC 42464
- Chaetomium globosum CBS 148.51
- Thielavia terrestris NRRL 8126
- Uncinocarpus reesii 1704
- Ajellomyces capsulatus Nam1
- Ajellomyces dermatitidis SLH14081
- Paracoccidioides sp. lutzi Fb01
- Coccidioides posadasii C735 delta SOWgp
- Coccidioides immitis RS
- Trichophyton rubrum CBS 118892
- Trichophyton verrucosum HKI 0517
- Arthroderma benhamiae CBS 112371
- Arthroderma gypseum CBS 118893
- Arthroderma otae CBS 113480
- Talaromyces stipitatus ATCC 10500
- Neosartorya fischeri
- Emericella nidulans
- Penicillium chrysogenum Wisconsin 54 1255
- Penicillium marneffei ATCC 18224
- Aspergillus clavatus
- Aspergillus flavus
- Aspergillus oryzae
- Aspergillus niger
- Aspergillus fumigatus
- Aspergillus terreus
- Monosiga brevicollis MX1
- Amphimedon queenslandica
- Trichoplax adhaerens
- Nematostella vectensis
- Hydra magnipapillata
- Schistosoma mansoni
- Trichiella spiralis
- Pristionchus pacificus
- Caenorhabditis brenneri
- Caenorhabditis briggsae
- Caenorhabditis remanei
- Caenorhabditis japonica
- Caenorhabditis elegans
- Ixodes scapularis
- Daphnia pulex
- Pediculus humanus
- Acyrtosiphon pisum
- Tribolium castaneum
- Nasonia vitripennis
- Apis mellifera
- Atta cephalotes
- Bombyx mori
- Danaus plexippus
- Heliconia melpomene
- Culex quinquefasciatus
- Aedes aegypti
- Anopheles gambiae
- Anopheles darlingi
- Drosophila virilis
- Drosophila grimshawi
- Drosophila willistoni
- Drosophila pseudoobscura
- Drosophila ananassae
- Drosophila melanogaster
- Drosophila yakuba
- Strongylocentrotus purpuratus
- Branchiostoma floridae
- Ciona intestinalis
- Ciona savignyi
- Petromyzon marinus
- Danio rerio
- Gadus morhua
- Oreochromis niloticus
- Takifugu rubripes
- Tetraodon nigroviridis
- Gasterosteus aculeatus
- Xiphophorus maculatus
- Oryzias latipes
- Latimeria chalumnae
- Xenopus (Silurana) tropicalis
- Pelodiscus sinensis
- Anolis carolinensis
- Taeniopygia guttata
- Gallus gallus
- Meleagris gallopavo
- Ornithorhynchus anatinus
- Monodelphis domestica
- Sarcophilus harrisii
- Macropus eugenii
- Dasyurus novemcinctus
- Loxodonta africana
- Echinops telillari
- Procavia capensis
- Myotis lucifugus
- Pteropus vampyrus
- Sus scrofa
- Tursiops truncatus
- Bos taurus
- Equus caballus
- Felis catus
- Canis lupus familiaris
- Mustela putorius furo
- Alluropoda melanoleuca
- Cryptolestes cuniculus
- Cavia porcellus
- Ictidomys tridecemlineatus
- Dipodomys ordii
- Rattus norvegicus
- Mus musculus
- Tupaia belangeri
- Otolemur garrettii
- Microcebus murinus
- Tarsius syrichta
- Callithrix jacchus
- Macaca mulatta
- Nomascus leucogenys
- Pongo abelii
- Gorilla gorilla
- Pan troglodytes
- Homo sapiens
- Perkinsus marinus ATCC 50983
- Tetrahymena thermophila
- Paramecium tetraurelia strain d4 2
- Neospora caninum Liverpool
- Toxoplasma gondii
- Cryptosporidium muris RN66
- Cryptosporidium parvum Iowa II
- Cryptosporidium hominis TU502
- Theileria annulata strain Ankara
- Theileria parva strain Muguga
- Plasmodium falciparum
- Plasmodium knowlesi
- Plasmodium vivax
- Plasmodium chabaudi
- Plasmodium yoelii yoelii 17XNL
- Plasmodium berghei
- Phaeodactylum tricornutum
- Thalassiosira pseudonana
- Pythium ultimum
- Albugo liliaceae
- Hyaloperonospora arabidopsidis
- Phytophthora ramorum
- Phytophthora infestans
- Phytophthora sojae
- Trypanosoma brucei
- Trypanosoma cruzi strain CL Brener
- Leishmania braziliensis MHOM BR 75 M2904
- Leishmania mexicana MHOM GT 2001 U1103
- Leishmania major
- Leishmania donovani
- Leishmania infantum JPCM5
- Entamoeba histolytica
- Entamoeba dispar SAW760
- Dicystostellum discoideum
- Dicystostellum purpureum
- Trichomonas vaginalis G3
- Trichomonas vaginalis
- Naegleria gruberi
- Giardia lamblia ATCC 50803

- OG presence
- OG absence
- Inferred root

Dscore = 1  
Pvalue = 4.33e-06  
AdjPvalue = 5.16e-04

- Arabis thaliana
- Arabidopsis lyrata
- Brassica rapa
- Glycine max
- Populus trichocarpa
- Vitis vinifera
- Solanum tuberosum
- Solanum lycopersicum
- Oryza sativa Indica Group
- Oryza sativa Japonica Group
- Oryza brachyantha
- Oryza glaberrima
- Hordeum vulgare
- Brachypodium distachyon
- Zea mays
- Sorghum bicolor
- Setaria italica
- Musa acuminata
- Salvinella moellendorffii
- Physcomitrella patens
- Ostreococcus tauri
- Ostreococcus lucimarinus CCE9901
- Chlamydomonas reinhardtii
- Cyanidioschyzon merolae
- Encephalitozoon hellem ATCC 50504
- Encephalitozoon intestinalis ATCC 50506
- Encephalitozoon cuniculi GB M1
- Puccinia graminis
- Puccinia triticina
- Ustilago maydis
- Melassezia globosa CBS 7966
- Cryptococcus gattii WM276
- Cryptococcus neoformans var. neoformans JEC21
- Cryptococcus neoformans var. neoformans B 3501A
- Phanerochaete chrysosporium
- Schizophyllum commune H4 B
- Coprinopsis cinerea okayama7\_130
- Laccaria bicolor S238N H82
- Schizosaccharomyces japonicus yFS275
- Schizosaccharomyces pombe
- Clavospora lusitanae ATCC 42720
- Yarrowia lipolytica
- Candida tropicalis MYA 3404
- Candida dubliniensis CD36
- Lodderomyces elongisporus NRRL YB 4239
- Scheffersomyces stipitis CBS 6054
- Meyerozyma guilliermondii ATCC 6260
- Pichia guilliermondii
- Lachancea thermotolerans
- Kluyveromyces fragilis NRRL Y 1140
- Saccharomyces cerevisiae
- Zygosaccharomyces rouxii
- Komagataella pastoris GS115
- Vanderwaltozyma polyspora DSM 70294
- Torulopsis delbrueckii
- Candida glabrata CBS 138
- Tetrapispora phaffii CBS 4417
- Naumovozyma dairensis CBS 421
- Naumovozyma castellii CBS 4309
- Eremothecium cymbalariae DBVPG\_7215
- Eremothecium gossypii
- Tuber melanosporum
- Zymoseptoria tritici
- Phaeosphaeria nodorum
- Leptosphaeria maculans
- Pyrenophora tritici repens Pt 1C BFP
- Pyrenophora teres f. teres 0 1
- Botryotinia fuckeliana
- Sclerotinia sclerotiorum
- Verticillium albo atrum VaMs.102
- Fusarium oxysporum
- Hypocrea virens
- Hypocrea jecorina
- Nectria haematococca
- Gibberella moniliformis
- Gibberella zeae PH 1
- Gibberella zeae
- Gaeumannomyces graminis
- Magnaporthe grisea
- Magnaporthe poae
- Magnaporthe oryzae
- Podospira anserina S mat
- Neurospora crassa
- Sordaria macrospora k hell
- Myceliophthora thermophila ATCC 42464
- Chaetomium globosum CBS 148.51
- Thielavia terrestris NRRL 8126
- Uncinocarpus reesii 1704
- Ajellomyces capsulatus Nam1
- Ajellomyces dermatitidis SLH14081
- Paracoccidioides sp. lutzi Fb01
- Coccidioides posadasii C735 delta SOWgp
- Coccidioides immitis RS
- Trichophyton rubrum CBS 118892
- Trichophyton verrucosum HKI 0517
- Arthroderma benhamiae CBS 112371
- Arthroderma gypseum CBS 118893
- Arthroderma otae CBS 113480
- Talaromyces stipitatus ATCC 10500
- Neosartorya fischeri
- Emericella nidulans
- Penicillium chrysogenum Wisconsin 54 1255
- Penicillium marneffei ATCC 18224
- Aspergillus clavatus
- Aspergillus flavus
- Aspergillus oryzae
- Aspergillus niger
- Aspergillus fumigatus
- Aspergillus terreus
- Monosiga brevicollis MX1
- Amphimedon queenslandica
- Trichoplax adhaerens
- Nematostella vectensis
- Hydra magnipapillata
- Schistosoma mansoni
- Trichiella spiralis
- Pristionchus pacificus
- Caenorhabditis brenneri
- Caenorhabditis briggsae
- Caenorhabditis remanei
- Caenorhabditis japonica
- Caenorhabditis elegans
- Ixodes scapularis
- Daphnia pulex
- Pediculus humanus
- Acyrtosiphon pisum
- Tribolium castaneum
- Nasonia vitripennis
- Apis mellifera
- Atta cephalotes
- Bombyx mori
- Danaus plexippus
- Heliconius melpomene
- Culex quinquefasciatus
- Aedes aegypti
- Anopheles gambiae
- Anopheles darlingi
- Drosophila virilis
- Drosophila grimshawi
- Drosophila willistoni
- Drosophila pseudoobscura
- Drosophila ananassae
- Drosophila melanogaster
- Drosophila yakuba
- Strongylocentrotus purpuratus
- Branchiostoma floridae
- Ciona intestinalis
- Ciona savignyi
- Petromyzon marinus
- Danio rerio
- Gadus morhua
- Oreochromis niloticus
- Takifugu rubripes
- Tetraodon nigroviridis
- Gasterosteus aculeatus
- Xiphophorus maculatus
- Oryzias latipes
- Latimeria chalumnae
- Xenopus (Silurana) tropicalis
- Pelodiscus sinensis
- Anolis carolinensis
- Taeniopygia guttata
- Gallus gallus
- Meleagris gallopavo
- Ornithorhynchus anatinus
- Monodelphis domestica
- Sarcophilus harrisii
- Macropus eugenii
- Dasyurus novemcinctus
- Loxodonta africana
- Echinops telillari
- Procavia capensis
- Myotis lucifugus
- Pteropus vampyrus
- Sus scrofa
- Tursiops truncatus
- Bos taurus
- Equus caballus
- Felis catus
- Canis lupus familiaris
- Mustela putorius furo
- Alluropoda melanoleuca
- Cryptolepis cuniculus
- Cavia porcellus
- Ictidomys tridecemlineatus
- Dipodomys ordii
- Rattus norvegicus
- Mus musculus
- Tupaia belangeri
- Urolemus garrettii
- Microcebus murinus
- Tarsius syrichta
- Callithrix jacchus
- Macaca mulatta
- Nomascus leucogenys
- Pongo abelii
- Gorilla gorilla
- Pan troglodytes
- Homo sapiens
- Perkinsus marinus ATCC 50983
- Tetrahymena thermophila
- Paramecium tetraurelia strain d4 2
- Neospora caninum Liverpool
- Toxoplasma gondii
- Cryptosporidium muris RN66
- Cryptosporidium parvum Iowa II
- Cryptosporidium hominis TU502
- Theileria annulata strain Ankara
- Theileria parva strain Muguga
- Plasmodium falciparum
- Plasmodium knowlesi
- Plasmodium vivax
- Plasmodium chabaudi
- Plasmodium yoelii yoelii 17XNL
- Plasmodium berghei
- Phaeodactylum tricornutum
- Thalassiosira pseudonana
- Pythium ultimum
- Albugo liliaceae
- Hyaloperonospora arabidopsidis
- Phytophthora ramorum
- Phytophthora infestans
- Phytophthora sojae
- Trypanosoma brucei
- Trypanosoma cruzi strain CL Brener
- Leishmania braziliensis MHOM BR 75 M2904
- Leishmania mexicana MHOM GT 2001 U1103
- Leishmania major
- Leishmania donovani
- Leishmania infantum JPCM5
- Entamoeba histolytica
- Entamoeba dispar SAW760
- Dicystostellum discoideum
- Dicystostellum purpureum
- Trichomonas vaginalis G3
- Trichomonas vaginalis
- Naegleria gruberi
- Giardia lamblia ATCC 50803

- OG presence
- OG absence
- Inferred root

Dscore = 1  
Pvalue = 5.99e-06  
AdjPvalue = 7.13e-04

- Arabis thaliana
- Arabidopsis lyrata
- Brassica rapa
- Glycine max
- Populus trichocarpa
- Vitis vinifera
- Solanum tuberosum
- Solanum lycopersicum
- Oryza sativa Indica Group
- Oryza sativa Japonica Group
- Oryza brachyantha
- Oryza glaberrima
- Hordeum vulgare
- Brachypodium distachyon
- Zea mays
- Sorghum bicolor
- Setaria italica
- Musa acuminata
- Selaginella moellendorffii
- Physcomitrella patens
- Ostreococcus tauri
- Ostreococcus lucimarinus CCE9901
- Chlamydomonas reinhardtii
- Cyanidioschyzon merolae
- Encephalitozoon hellem ATCC 50504
- Encephalitozoon intestinalis ATCC 50506
- Encephalitozoon cuniculi GB M1
- Puccinia graminis
- Puccinia triticina
- Ustilago maydis
- Melassezia globosa CBS 7966
- Cryptococcus gattii WM276
- Cryptococcus neoformans var. neoformans JEC21
- Cryptococcus neoformans var. neoformans B 3501A
- Phanerochaete chrysosporium
- Schizophyllum commune H4 B
- Coprinopsis cinerea okayama7\_130
- Laccaria bicolor S238N H82
- Schizosaccharomyces japonicus yFS275
- Schizosaccharomyces pombe
- Clavospora lusitanae ATCC 42720
- Yarrowia lipolytica
- Candida tropicalis MYA 3404
- Candida dubliniensis CD36
- Lodderomyces elongisporus NRRL YB 4239
- Scheffersomyces stipitis CBS 6054
- Meyerozyma guilliermondii ATCC 6260
- Pichia guilliermondii
- Lachancea thermotolerans
- Kluyveromyces fragilis NRRL Y 1140
- Saccharomyces cerevisiae
- Zygosaccharomyces rouxii
- Komagataella pastoris GS115
- Vanderwaltozyma polyspora DSM 70294
- Torulopsis delbrueckii
- Candida glabrata CBS 138
- Tetrapispora phaffii CBS 4417
- Naumovozyma dairensis CBS 421
- Naumovozyma castellii CBS 4309
- Eremothecium cymbalariae DBVPG\_7215
- Eremothecium gossypii
- Tuber melanosporum
- Zymoseptoria tritici
- Phaeosphaeria nodorum
- Leptosphaeria maculans
- Pyrenophora tritici repens Pt 1C BFP
- Pyrenophora teres f. teres 0 1
- Botryotinia fuckeliana
- Sclerotinia sclerotiorum
- Verticillium albo atrum VaMs.102
- Fusarium oxysporum
- Hypocrea virens
- Hypocrea jecorina
- Nectria haematococca
- Gibberella moniliformis
- Gibberella zeae PH 1
- Gibberella zeae
- Gaeumannomyces graminis
- Magnaporthe grisea
- Magnaporthe poae
- Magnaporthe oryzae
- Podospira anserina S mat
- Neurospora crassa
- Sordaria macrospora k hell
- Myceliophthora thermophila ATCC 42464
- Chaetomium globosum CBS 148.51
- Thielavia terrestris NRRL 8126
- Uncinocarpus reesii 1704
- Ajellomyces capsulatus Nam1
- Ajellomyces dermatitidis SLH14081
- Paracoccidioides sp. lutzi Fb01
- Coccidioides posadasii C735 delta SOWgp
- Coccidioides immitis RS
- Trichophyton rubrum CBS 118892
- Trichophyton verrucosum HKI 0517
- Arthroderma benhamiae CBS 112371
- Arthroderma gypseum CBS 118893
- Arthroderma otae CBS 113480
- Talaromyces stipitatus ATCC 10500
- Neosartorya fischeri
- Emericella nidulans
- Penicillium chrysogenum Wisconsin 54 1255
- Penicillium marneffei ATCC 18224
- Aspergillus clavatus
- Aspergillus flavus
- Aspergillus oryzae
- Aspergillus niger
- Aspergillus fumigatus
- Aspergillus terreus
- Monosiga brevicollis MX1
- Amphimedon queenslandica
- Trichoplax adhaerens
- Nematostella vectensis
- Hydra magnipapillata
- Schistosoma mansoni
- Trichinella spiralis
- Pristionchus pacificus
- Caenorhabditis breneri
- Caenorhabditis briggsae
- Caenorhabditis remanei
- Caenorhabditis japonica
- Caenorhabditis elegans
- Ixodes scapularis
- Daphnia pulex
- Pediculus humanus
- Acyrtosiphon pisum
- Tribolium castaneum
- Nasonia vitripennis
- Apis mellifera
- Atta cephalotes
- Bombyx mori
- Danaus plexippus
- Heliconius melpomene
- Culex quinquefasciatus
- Aedes aegypti
- Anopheles gambiae
- Anopheles darlingi
- Drosophila virilis
- Drosophila grimshawi
- Drosophila willistoni
- Drosophila pseudoobscura
- Drosophila ananassae
- Drosophila melanogaster
- Drosophila yakuba
- Strongylocentrotus purpuratus
- Branchiostoma floridae
- Ciona intestinalis
- Ciona savignyi
- Petromyzon marinus
- Danio rerio
- Gadus morhua
- Oreochromis niloticus
- Takifugu rubripes
- Tetraodon nigroviridis
- Gasterosteus aculeatus
- Xiphophorus maculatus
- Oryzias latipes
- Latimeria chalumnae
- Xenopus (Silurana) tropicalis
- Pelodiscus sinensis
- Anolis carolinensis
- Taeniopygia guttata
- Gallus gallus
- Meleagris gallopavo
- Ornithorhynchus anatinus
- Monodelphis domestica
- Sarcophilus harrisii
- Macropus eugenii
- Dasyurus novemcinctus
- Loxodonta africana
- Echinops telitarii
- Procavia capensis
- Myotis lucifugus
- Pteropus vampyrus
- Sus scrofa
- Tursiops truncatus
- Bos taurus
- Equus caballus
- Felis catus
- Canis lupus familiaris
- Mustela putorius furo
- Alluropoda melanoleuca
- Cryptolestes cuniculus
- Cavia porcellus
- Ictidomys tridecemlineatus
- Dipodomys ordii
- Rattus norvegicus
- Mus musculus
- Tupaia belangeri
- Otolomus garretti
- Microcebus murinus
- Tarsius syrichta
- Callithrix jacchus
- Macaca mulatta
- Nomascus leucogenys
- Pongo abelii
- Gorilla gorilla
- Pan troglodytes
- Homo sapiens
- Perkinsus marinus ATCC 50983
- Tetrahymena thermophila
- Paramecium tetraurelia strain d4 2
- Neospora caninum Liverpool
- Toxoplasma gondii
- Cryptosporidium muris RN66
- Cryptosporidium parvum Iowa II
- Cryptosporidium hominis TU502
- Theileria annulata strain Ankara
- Theileria parva strain Muguga
- Plasmodium falciparum
- Plasmodium knowlesi
- Plasmodium vivax
- Plasmodium chabaudi
- Plasmodium yoelii yoelii 17XNL
- Plasmodium berghei
- Phaeodactylum tricornutum
- Thalassiosira pseudonana
- Pythium ultimum
- Albugo liliaceae
- Hyaloperonospora arabidopsidis
- Phytophthora ramorum
- Phytophthora infestans
- Phytophthora sojae
- Trypanosoma brucei
- Trypanosoma cruzi strain CL Brener
- Leishmania braziliensis MHOM BR 75 M2904
- Leishmania mexicana MHOM GT 2001 U1103
- Leishmania major
- Leishmania donovani
- Leishmania infantum JPCM5
- Entamoeba histolytica
- Entamoeba dispar SAW760
- Dicystostellum discoideum
- Dicystostellum purpureum
- Trichomonas vaginalis G3
- Trichomonas vaginalis
- Naegleria gruberi
- Giardia lamblia ATCC 50803

- OG presence
- OG absence
- Inferred root

Dscore = 0.889  
Pvalue = 4.82e-05  
AdjPvalue = 5.73e-03

# NOG144070

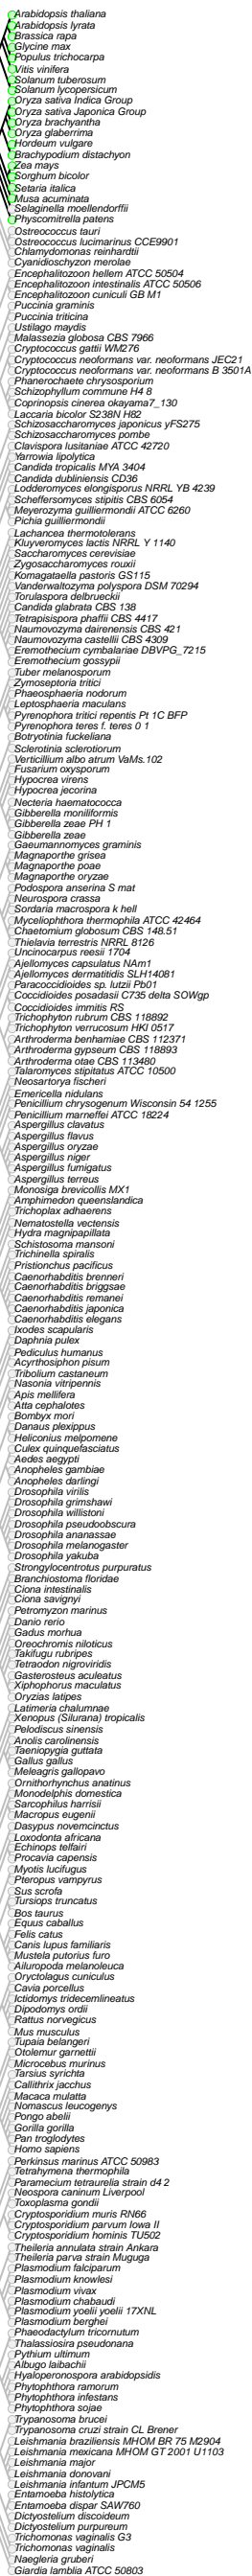

Dscore = 0.889  
 Pvalue = 6.37e-05  
 AdjPvalue = 7.58e-03

- Arabis thaliana
- Arabidopsis lyrata
- Brassica rapa
- Glycine max
- Populus trichocarpa
- Vitis vinifera
- Solanum tuberosum
- Solanum lycopersicum
- Oryza sativa Indica Group
- Oryza sativa Japonica Group
- Oryza brachyantha
- Oryza glaberrima
- Hordeum vulgare
- Brachypodium distachyon
- Zea mays
- Sorghum bicolor
- Setaria italica
- Musa acuminata
- Salvinella moellendorffii
- Physcomitrella patens
- Ostreococcus tauri
- Ostreococcus lucimarinus CCE9901
- Chlamydomonas reinhardtii
- Cyanidioschyzon merolae
- Encephalitozoon hellem ATCC 50504
- Encephalitozoon intestinalis ATCC 50506
- Encephalitozoon cuniculi GB M1
- Puccinia graminis
- Puccinia triticina
- Ustilago maydis
- Melassezia globosa CBS 7966
- Cryptococcus gattii WM276
- Cryptococcus neoformans var. neoformans JEC21
- Cryptococcus neoformans var. neoformans B 3501A
- Phanerochaete chrysosporium
- Schizophyllum commune H4 B
- Coprinopsis cinerea okayama7\_130
- Laccaria bicolor S238N H82
- Schizosaccharomyces japonicus yFS275
- Schizosaccharomyces pombe
- Clavospora lusitanae ATCC 42720
- Yarrowia lipolytica
- Candida tropicalis MYA 3404
- Candida dubliniensis CD36
- Lodderomyces elongisporus NRRL YB 4239
- Scheffersomyces stipitis CBS 6054
- Meyerozyma guilliermondii ATCC 6260
- Pichia guilliermondii
- Lachancea thermotolerans
- Kluyveromyces fragilis NRRL Y 1140
- Saccharomyces cerevisiae
- Zygosaccharomyces rouxii
- Komagataella pastoris GS115
- Vanderwaltozyma polyspora DSM 70294
- Torulopsis delbrueckii
- Candida glabrata CBS 138
- Tetrapispora phaffii CBS 4417
- Naumovozyma dairenensis CBS 421
- Naumovozyma castellii CBS 4309
- Eremothecium cymbalariae DBVPG\_7215
- Eremothecium gossypii
- Tuber melanosporum
- Zymoseptoria tritici
- Phaeosphaeria nodorum
- Leptosphaeria maculans
- Pyrenophora tritici repens Pt 1C BFP
- Pyrenophora teres f. teres 0 1
- Botryotinia fuckeliana
- Sclerotinia sclerotiorum
- Verticillium albo atrum VaMs.102
- Fusarium oxysporum
- Hypocrea virens
- Hypocrea jecorina
- Nectria haematococca
- Gibberella moniliformis
- Gibberella zeae PH 1
- Gibberella zeae
- Gaeumannomyces graminis
- Magnaporthe grisea
- Magnaporthe poae
- Magnaporthe oryzae
- Podospira anserina S mat
- Neurospora crassa
- Sordaria macrospora k hell
- Myceliophthora thermophila ATCC 42464
- Chaetomium globosum CBS 148.51
- Thielavia terrestris NRRL 8126
- Uncinocarpus reesii 1704
- Ajellomyces capsulatus Nam1
- Ajellomyces dermatitidis SLH14081
- Paracoccidioides sp. lutzi Fb01
- Coccidioides posadasii C735 delta SOWgp
- Coccidioides immitis RS
- Trichophyton rubrum CBS 118892
- Trichophyton verrucosum HKI 0517
- Arthroderma benhamiae CBS 112371
- Arthroderma gypseum CBS 118893
- Arthroderma otae CBS 113480
- Talaromyces stipitatus ATCC 10500
- Neosartorya fischeri
- Emericella nidulans
- Penicillium chrysogenum Wisconsin 54 1255
- Penicillium marneffei ATCC 18224
- Aspergillus clavatus
- Aspergillus flavus
- Aspergillus oryzae
- Aspergillus niger
- Aspergillus fumigatus
- Aspergillus terreus
- Monosiga brevicollis MX1
- Amphimedon queenslandica
- Trichoplax adhaerens
- Nematostella vectensis
- Hydra magnipapillata
- Schistosoma mansoni
- Trichinella spiralis
- Pristionchus pacificus
- Caenorhabditis brenneri
- Caenorhabditis briggsae
- Caenorhabditis remanei
- Caenorhabditis japonica
- Caenorhabditis elegans
- Ixodes scapularis
- Daphnia pulex
- Pediculus humanus
- Acyrtosiphon pisum
- Tribolium castaneum
- Nasonia vitripennis
- Apis mellifera
- Atta cephalotes
- Bombyx mori
- Danaus plexippus
- Heliconia melpomene
- Culex quinquefasciatus
- Aedes aegypti
- Anopheles gambiae
- Anopheles darlingi
- Drosophila virilis
- Drosophila grimshawi
- Drosophila willistoni
- Drosophila pseudoobscura
- Drosophila ananassae
- Drosophila melanogaster
- Drosophila yakuba
- Strongylocentrotus purpuratus
- Branchiostoma floridae
- Ciona intestinalis
- Ciona savignyi
- Petromyzon marinus
- Danio rerio
- Gadus morhua
- Oreochromis niloticus
- Takifugu rubripes
- Tetraodon nigroviridis
- Gasterosteus aculeatus
- Xiphophorus maculatus
- Oryzias latipes
- Latimeria chalumnae
- Xenopus (Silurana) tropicalis
- Pelodiscus sinensis
- Anolis carolinensis
- Taeniopygia guttata
- Gallus gallus
- Meleagris gallopavo
- Ornithorhynchus anatinus
- Monodelphis domestica
- Sarcophilus harrisii
- Macropus eugenii
- Dasyurus novemcinctus
- Loxodonta africana
- Echinops telillari
- Procavia capensis
- Myotis lucifugus
- Pteropus vampyrus
- Sus scrofa
- Tursiops truncatus
- Bos taurus
- Equus caballus
- Felis catus
- Canis lupus familiaris
- Mustela putorius furo
- Alluropoda melanoleuca
- Cryptolestes cuniculus
- Cavia porcellus
- Ictidomys tridecemlineatus
- Dipodomys ordii
- Rattus norvegicus
- Mus musculus
- Tupaia belangeri
- Urolemus garretti
- Microcebus murinus
- Tarsius syrichta
- Callithrix jacchus
- Macaca mulatta
- Nomascus leucogenys
- Pongo abelii
- Gorilla gorilla
- Pan troglodytes
- Homo sapiens
- Perkinsus marinus ATCC 50983
- Tetrahymena thermophila
- Paramecium tetraurelia strain d4 2
- Neospora caninum Liverpool
- Toxoplasma gondii
- Cryptosporidium muris RN66
- Cryptosporidium parvum Iowa II
- Cryptosporidium hominis TU502
- Theileria annulata strain Ankara
- Theileria parva strain Muguga
- Plasmodium falciparum
- Plasmodium knowlesi
- Plasmodium vivax
- Plasmodium chabaudi
- Plasmodium yoelii yoelii 17XNL
- Plasmodium berghei
- Phaeodactylum tricornutum
- Thalassiosira pseudonana
- Pythium ultimum
- Albugo liliaceae
- Hyaloperonospora arabidopsidis
- Phytophthora ramorum
- Phytophthora infestans
- Phytophthora sojae
- Trypanosoma brucei
- Trypanosoma cruzi strain CL Brener
- Leishmania braziliensis MHOM BR 75 M2904
- Leishmania mexicana MHOM GT 2001 U1103
- Leishmania major
- Leishmania donovani
- Leishmania infantum JPCM5
- Entamoeba histolytica
- Entamoeba dispar SAW760
- Dicystostellum discoideum
- Dicystostellum purpureum
- Trichomonas vaginalis G3
- Trichomonas vaginalis
- Naegleria gruberi
- Giardia lamblia ATCC 50803

- OG presence
- OG absence
- Inferred root

Dscore = 0.992  
Pvalue = 8.45e-06  
AdjPvalue = 1.01e-03

- Arabis thaliana
- Arabidopsis lyrata
- Brassica rapa
- Glycine max
- Populus trichocarpa
- Vitis vinifera
- Solanum tuberosum
- Solanum lycopersicum
- Oryza sativa Indica Group
- Oryza sativa Japonica Group
- Oryza brachyantha
- Oryza glaberrima
- Hordeum vulgare
- Brachypodium distachyon
- Zea mays
- Sorghum bicolor
- Setaria italica
- Musa acuminata
- Salvinella moellendorffii
- Physcomitrella patens
- Ostreococcus tauri
- Ostreococcus lucimarinus CCE9901
- Chlamydomonas reinhardtii
- Cyanidioschyzon merolae
- Encephalitozoon hellem ATCC 50504
- Encephalitozoon intestinalis ATCC 50506
- Encephalitozoon cuniculi GB M1
- Puccinia graminis
- Puccinia triticina
- Ustilago maydis
- Melassezia globosa CBS 7966
- Cryptococcus gattii WM276
- Cryptococcus neoformans var. neoformans JEC21
- Cryptococcus neoformans var. neoformans B 3501A
- Phanerochaete chrysosporium
- Schizophyllum commune H4 B
- Coprinopsis cinerea okayama7\_130
- Laccaria bicolor S238N H82
- Schizosaccharomyces japonicus yFS275
- Schizosaccharomyces pombe
- Clavospora lusitanae ATCC 42720
- Yarrowia lipolytica
- Candida tropicalis MYA 3404
- Candida dubliniensis CD36
- Lodderomyces elongisporus NRRL YB 4239
- Scheffersomyces stipitis CBS 6054
- Meyerozyma guilliermondii ATCC 6260
- Pichia guilliermondii
- Lachancea thermotolerans
- Kluyveromyces fragilis NRRL Y 1140
- Saccharomyces cerevisiae
- Zygosaccharomyces rouxii
- Komagataella pastoris GS115
- Vanderwaltozyma polyspora DSM 70294
- Torulopsis delbrueckii
- Candida glabrata CBS 138
- Tetrapispora phaffii CBS 4417
- Naumovozyma dairensis CBS 421
- Naumovozyma castellii CBS 4309
- Eremothecium cymbalariae DBVPG\_7215
- Eremothecium gossypii
- Tuber melanosporum
- Zymoseptoria tritici
- Phaeosphaeria nodorum
- Leptosphaeria maculans
- Pyrenophora tritici repens Pt 1C BFP
- Pyrenophora teres f. teres 0 1
- Botryotinia fuckeliana
- Sclerotinia sclerotiorum
- Verticillium albo atrum VaMs.102
- Fusarium oxysporum
- Hypocrea virens
- Hypocrea jecorina
- Nectria haematococca
- Gibberella moniliformis
- Gibberella zeae PH 1
- Gibberella zeae
- Gaeumannomyces graminis
- Magnaporthe grisea
- Magnaporthe poae
- Magnaporthe oryzae
- Podospira anserina S mat
- Neurospora crassa
- Sordaria macrospora k hell
- Myceliophthora thermophila ATCC 42464
- Chaetomium globosum CBS 148.51
- Thielavia terrestris NRRL 8126
- Uncinocarpus reesii 1704
- Ajellomyces capsulatus Nam1
- Ajellomyces dermatitidis SLH14081
- Paracoccidioides sp. lutzi Fb01
- Coccidioides posadasii C735 delta SOWgp
- Coccidioides immitis RS
- Trichophyton rubrum CBS 118892
- Trichophyton verrucosum HKI 0517
- Arthroderma benhamiae CBS 112371
- Arthroderma gypseum CBS 118893
- Arthroderma otae CBS 113480
- Talaromyces stipitatus ATCC 10500
- Neosartorya fischeri
- Emericella nidulans
- Penicillium chrysogenum Wisconsin 54 1255
- Penicillium marneffei ATCC 18224
- Aspergillus clavatus
- Aspergillus flavus
- Aspergillus oryzae
- Aspergillus niger
- Aspergillus fumigatus
- Aspergillus terreus
- Monosiga brevicollis MX1
- Amphimedon queenslandica
- Trichoplax adhaerens
- Nematostella vectensis
- Hydra magnipapillata
- Schistosoma mansoni
- Trichinella spiralis
- Pristionchus pacificus
- Caenorhabditis brenneri
- Caenorhabditis briggsae
- Caenorhabditis remanei
- Caenorhabditis japonica
- Caenorhabditis elegans
- Ixodes scapularis
- Daphnia pulex
- Pediculus humanus
- Acyrtosiphon pisum
- Tribolium castaneum
- Nasonia vitripennis
- Apis mellifera
- Atta cephalotes
- Bombyx mori
- Danaus plexippus
- Heliconius melpomene
- Culex quinquefasciatus
- Aedes aegypti
- Anopheles gambiae
- Anopheles darlingi
- Drosophila virilis
- Drosophila grimshawi
- Drosophila willistoni
- Drosophila pseudoobscura
- Drosophila ananassae
- Drosophila melanogaster
- Drosophila yakuba
- Strongylocentrotus purpuratus
- Branchiostoma floridae
- Ciona intestinalis
- Ciona savignyi
- Petromyzon marinus
- Danio rerio
- Gadus morhua
- Oreochromis niloticus
- Takifugu rubripes
- Tetraodon nigroviridis
- Gasterosteus aculeatus
- Xiphophorus maculatus
- Oryzias latipes
- Latimeria chalumnae
- Xenopus (Silurana) tropicalis
- Pelodiscus sinensis
- Anolis carolinensis
- Taeniopygia guttata
- Gallus gallus
- Meleagris gallopavo
- Ornithorhynchus anatinus
- Monodelphis domestica
- Sarcophilus harrisii
- Macropus eugenii
- Dasyurus novemcinctus
- Loxodonta africana
- Echinops telitarii
- Procavia capensis
- Myotis lucifugus
- Pteropus vampyrus
- Sus scrofa
- Tursiops truncatus
- Bos taurus
- Equus caballus
- Felis catus
- Canis lupus familiaris
- Mustela putorius furo
- Alluropoda melanoleuca
- Cryptolestes cuniculus
- Cavia porcellus
- Ictidomys tridecemlineatus
- Dipodomys ordii
- Rattus norvegicus
- Mus musculus
- Tupaia belangeri
- Urolemus garrettii
- Microcebus murinus
- Tarsius syrichta
- Callithrix jacchus
- Macaca mulatta
- Nomascus leucogenys
- Pongo abelii
- Gorilla gorilla
- Pan troglodytes
- Homo sapiens
- Perkinsus marinus ATCC 50983
- Tetrahymena thermophila
- Paramecium tetraurelia strain d4 2
- Neospora caninum Liverpool
- Toxoplasma gondii
- Cryptosporidium muris RN66
- Cryptosporidium parvum Iowa II
- Cryptosporidium hominis TU502
- Theileria annulata strain Ankara
- Theileria parva strain Muguga
- Plasmodium falciparum
- Plasmodium knowlesi
- Plasmodium vivax
- Plasmodium chabaudi
- Plasmodium yoelii yoelii 17XNL
- Plasmodium berghei
- Phaeodactylum tricornutum
- Thalassiosira pseudonana
- Pythium ultimum
- Albugo liliaceae
- Hyaloperonospora arabidopsidis
- Phytophthora ramorum
- Phytophthora infestans
- Phytophthora sojae
- Trypanosoma brucei
- Trypanosoma cruzi strain CL Brener
- Leishmania braziliensis MHOM BR 75 M2904
- Leishmania mexicana MHOM GT 2001 U1103
- Leishmania major
- Leishmania donovani
- Leishmania infantum JPCM5
- Entamoeba histolytica
- Entamoeba dispar SAW760
- Dicystostellum discoideum
- Dicystostellum purpureum
- Trichomonas vaginalis G3
- Trichomonas vaginalis
- Naegleria gruberi
- Giardia lamblia ATCC 50803

- OG presence
- OG absence
- Inferred root

Dscore = 0.975  
Pvalue = 5.10e-06  
AdjPvalue = 6.07e-04



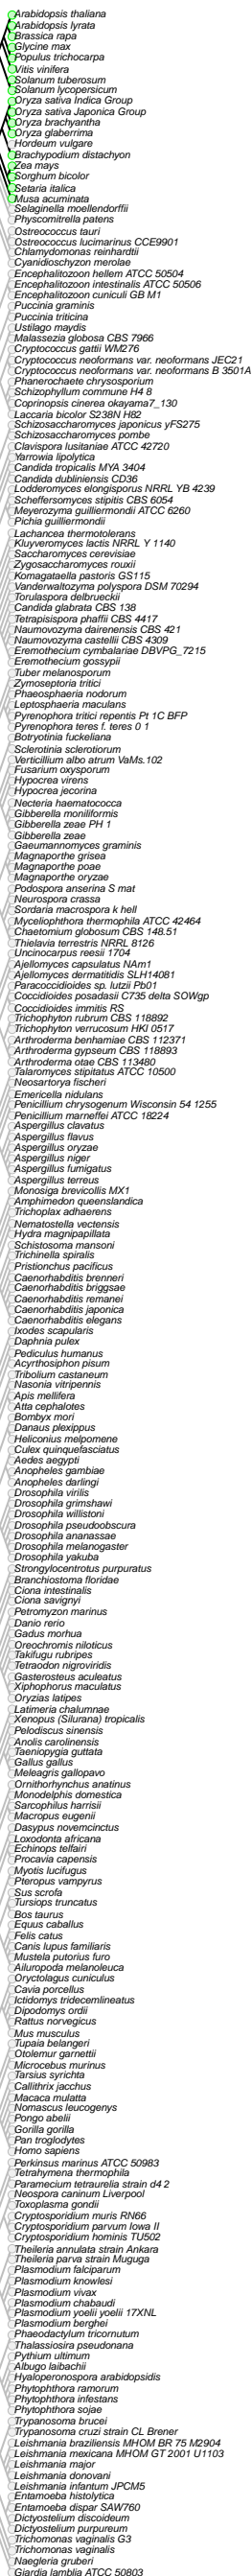

● OG presence  
 ○ OG absence  
 ◆ Inferred root

Dscore = 0.992  
 Pvalue = 9.85e-06  
 AdjPvalue = 1.17e-03

- Arabis thaliana
- Arabidopsis lyrata
- Brassica rapa
- Glycine max
- Populus trichocarpa
- Vitis vinifera
- Solanum tuberosum
- Solanum lycopersicum
- Oryza sativa Indica Group
- Oryza sativa Japonica Group
- Oryza brachyantha
- Oryza glaberrima
- Hordeum vulgare
- Brachypodium distachyon
- Zea mays
- Sorghum bicolor
- Setaria italica
- Musa acuminata
- Selaginella moellendorffii
- Physcomitrella patens
- Ostreococcus tauri
- Ostreococcus lucimarinus CCE9901
- Chlamydomonas reinhardtii
- Cyanidioschyzon merolae
- Encephalitozoon hellem ATCC 50504
- Encephalitozoon intestinalis ATCC 50506
- Encephalitozoon cuniculi GB M1
- Puccinia graminis
- Puccinia triticina
- Ustilago maydis
- Malassezia globosa CBS 7966
- Cryptococcus gattii WM276
- Cryptococcus neoformans var. neoformans JEC21
- Cryptococcus neoformans var. neoformans B 3501A
- Phanerochaete chrysosporium
- Schizophyllum commune H4 B
- Coprinopsis cinerea okayama7\_130
- Laccaria bicolor S238N H82
- Schizosaccharomyces japonicus yFS275
- Schizosaccharomyces pombe
- Clavospora lusitanae ATCC 42720
- Yarrowia lipolytica
- Candida tropicalis MYA 3404
- Candida dubliniensis CD36
- Lodderomyces elongisporus NRRL YB 4239
- Scheffersomyces stipitis CBS 6054
- Meyerozyma guilliermondii ATCC 6260
- Pichia guilliermondii
- Lachancea thermotolerans
- Kluyveromyces fragilis NRRL Y 1140
- Saccharomyces cerevisiae
- Zygosaccharomyces rouxii
- Komagataella pastoris GS115
- Vanderwaltozyma polyspora DSM 70294
- Torulopsis delbrueckii
- Candida glabrata CBS 138
- Tetrapispora phaffii CBS 4417
- Naumovozyma dairensis CBS 421
- Naumovozyma castellii CBS 4309
- Eremothecium cymbalariae DBVPG\_7215
- Eremothecium gossypii
- Tuber melanosporum
- Zymoseptoria tritici
- Phaeosphaeria nodorum
- Leptosphaeria maculans
- Pyrenophora tritici repens Pt 1C BFP
- Pyrenophora teres f. teres 0 1
- Botryotinia fuckeliana
- Sclerotinia sclerotiorum
- Verticillium albo atrum VaMs.102
- Fusarium oxysporum
- Hypocrea virens
- Hypocrea jecorina
- Nectria haematococca
- Gibberella moniliformis
- Gibberella zeae PH 1
- Gibberella zeae
- Gaeumannomyces graminis
- Magnaporthe grisea
- Magnaporthe poae
- Magnaporthe oryzae
- Podospira anserina S mat
- Neurospora crassa
- Sordaria macrospora k hell
- Myceliophthora thermophila ATCC 42464
- Chaetomium globosum CBS 148.51
- Thielavia terrestris NRRL 8126
- Uncinocarpus reesii 1704
- Ajellomyces capsulatus Nam1
- Ajellomyces dermatitidis SLH14081
- Paracoccidioides sp. lutzi Fb01
- Coccidioides posadasii C735 delta SOWgp
- Coccidioides immitis RS
- Trichophyton rubrum CBS 118892
- Trichophyton verrucosum HKI 0517
- Arthroderma benhamiae CBS 112371
- Arthroderma gypseum CBS 118893
- Arthroderma otae CBS 113480
- Talaromyces stipitatus ATCC 10500
- Neosartorya fischeri
- Emericella nidulans
- Penicillium chrysogenum Wisconsin 54 1255
- Penicillium marneffei ATCC 18224
- Aspergillus clavatus
- Aspergillus flavus
- Aspergillus oryzae
- Aspergillus niger
- Aspergillus fumigatus
- Aspergillus terreus
- Monosiga brevicollis MX1
- Amphimedon queenslandica
- Trichoplax adhaerens
- Nematostella vectensis
- Hydra magnipapillata
- Schistosoma mansoni
- Trichinella spiralis
- Pristionchus pacificus
- Caenorhabditis breneri
- Caenorhabditis briggsae
- Caenorhabditis remanei
- Caenorhabditis japonica
- Caenorhabditis elegans
- Ixodes scapularis
- Daphnia pulex
- Pediculus humanus
- Acyrtosiphon pisum
- Tribolium castaneum
- Nasonia vitripennis
- Apis mellifera
- Atta cephalotes
- Bombyx mori
- Danaus plexippus
- Heliconius melpomene
- Culex quinquefasciatus
- Aedes aegypti
- Anopheles gambiae
- Anopheles darlingi
- Drosophila virilis
- Drosophila grimshawi
- Drosophila willistoni
- Drosophila pseudoobscura
- Drosophila ananassae
- Drosophila melanogaster
- Drosophila yakuba
- Strongylocentrotus purpuratus
- Branchiostoma floridae
- Ciona intestinalis
- Ciona savignyi
- Petromyzon marinus
- Danio rerio
- Gadus morhua
- Oreochromis niloticus
- Takifugu rubripes
- Tetraodon nigroviridis
- Gasterosteus aculeatus
- Xiphophorus maculatus
- Oryzias latipes
- Latimeria chalumnae
- Xenopus (Silurana) tropicalis
- Pelodiscus sinensis
- Anolis carolinensis
- Taeniopygia guttata
- Gallus gallus
- Meleagris gallopavo
- Ornithorhynchus anatinus
- Monodelphis domestica
- Sarcophilus harrisii
- Macropus eugenii
- Dasyurus novemcinctus
- Loxodonta africana
- Echinops telillari
- Procavia capensis
- Myotis lucifugus
- Pteropus vampyrus
- Sus scrofa
- Tursiops truncatus
- Bos taurus
- Equus caballus
- Felis catus
- Canis lupus familiaris
- Mustela putorius furo
- Alluropoda melanoleuca
- Cryptolestes cuniculus
- Cavia porcellus
- Ictidomys tridecemlineatus
- Dipodomys ordii
- Rattus norvegicus
- Mus musculus
- Tupaia belangeri
- Otolomus garrettii
- Microcebus murinus
- Tarsius syrichta
- Callithrix jacchus
- Macaca mulatta
- Nomascus leucogenys
- Pongo abelii
- Gorilla gorilla
- Pan troglodytes
- Homo sapiens
- Perkinsus marinus ATCC 50983
- Tetrahymena thermophila
- Paramecium tetraurelia strain d4 2
- Neospora caninum Liverpool
- Toxoplasma gondii
- Cryptosporidium muris RN66
- Cryptosporidium parvum Iowa II
- Cryptosporidium hominis TU502
- Theileria annulata strain Ankara
- Theileria parva strain Muguga
- Plasmodium falciparum
- Plasmodium knowlesi
- Plasmodium vivax
- Plasmodium chabaudi
- Plasmodium yoelii yoelii 17XNL
- Plasmodium berghei
- Phaeodactylum tricornutum
- Thalassiosira pseudonana
- Pythium ultimum
- Albugo liliaceae
- Hyaloperonospora arabidopsidis
- Phytophthora ramorum
- Phytophthora infestans
- Phytophthora sojae
- Trypanosoma brucei
- Trypanosoma cruzi strain CL Brener
- Leishmania braziliensis MHOM BR 75 M2904
- Leishmania mexicana MHOM GT 2001 U1103
- Leishmania major
- Leishmania donovani
- Leishmania infantum JPCM5
- Entamoeba histolytica
- Entamoeba dispar SAW760
- Dicystostellum discoideum
- Dicystostellum purpureum
- Trichomonas vaginalis G3
- Trichomonas vaginalis
- Naegleria gruberi
- Giardia lamblia ATCC 50803

- OG presence
- OG absence
- Inferred root

Dscore = 1  
Pvalue = 6.27e-06  
AdjPvalue = 7.46e-04

- Arabis thaliana
- Arabidopsis lyrata
- Brassica rapa
- Glycine max
- Populus trichocarpa
- Vitis vinifera
- Solanum tuberosum
- Solanum lycopersicum
- Oryza sativa Indica Group
- Oryza sativa Japonica Group
- Oryza brachyantha
- Oryza glaberrima
- Hordeum vulgare
- Brachypodium distachyon
- Zea mays
- Sorghum bicolor
- Setaria italica
- Musa acuminata
- Salvinella moellendorffii
- Physcomitrella patens
- Ostreococcus tauri
- Ostreococcus lucimarinus CCE9901
- Chlamydomonas reinhardtii
- Cyanidioschyzon merolae
- Encephalitozoon hellem ATCC 50504
- Encephalitozoon intestinalis ATCC 50506
- Encephalitozoon cuniculi GB M1
- Puccinia graminis
- Puccinia triticina
- Ustilago maydis
- Melassezia globosa CBS 7966
- Cryptococcus gattii WM276
- Cryptococcus neoformans var. neoformans JEC21
- Cryptococcus neoformans var. neoformans B 3501A
- Phanerochaete chrysosporium
- Schizophyllum commune H4 B
- Coprinopsis cinerea okayama7\_130
- Laccaria bicolor S238N H82
- Schizosaccharomyces japonicus yFS275
- Schizosaccharomyces pombe
- Clavospora lusitanae ATCC 42720
- Yarrowia lipolytica
- Candida tropicalis MYA 3404
- Candida dubliniensis CD36
- Lodderomyces elongisporus NRRL YB 4239
- Scheffersomyces stipitis CBS 6054
- Meyerozyma guilliermondii ATCC 6260
- Pichia guilliermondii
- Lachancea thermotolerans
- Kluyveromyces fragilis NRRL Y 1140
- Saccharomyces cerevisiae
- Zygosaccharomyces rouxii
- Komagataella pastoris GS115
- Vanderwaltozyma polyspora DSM 70294
- Torulopsis delbrueckii
- Candida glabrata CBS 138
- Tetrapispora phaffii CBS 4417
- Naumovozyma dairensis CBS 421
- Naumovozyma castellii CBS 4309
- Eremothecium cymbalariae DBVPG\_7215
- Eremothecium gossypii
- Tuber melanosporum
- Zyoseptoria tritici
- Phaeosphaeria nodorum
- Leptosphaeria maculans
- Pyrenophora tritici repens Pt 1C BFP
- Pyrenophora teres f. teres 0 1
- Botryotinia fuckeliana
- Sclerotinia sclerotiorum
- Verticillium albo atrum VaMs.102
- Fusarium oxysporum
- Hypocrea virens
- Hypocrea jecorina
- Nectria haematococca
- Gibberella moniliformis
- Gibberella zeae PH 1
- Gibberella zeae
- Gaeumannomyces graminis
- Magnaporthe grisea
- Magnaporthe poae
- Magnaporthe oryzae
- Podospira anserina S mat
- Neurospora crassa
- Sordaria macrospora k hell
- Myceliophthora thermophila ATCC 42464
- Chaetomium globosum CBS 148.51
- Thielavia terrestris NRRL 8126
- Uncinocarpus reesii 1704
- Ajellomyces capsulatus Nam1
- Ajellomyces dermatitidis SLH14081
- Paracoccidioides sp. lutzi Fb01
- Coccidioides posadasii C735 delta SOWgp
- Coccidioides immitis RS
- Trichophyton rubrum CBS 118892
- Trichophyton verrucosum HKI 0517
- Arthroderma benhamiae CBS 112371
- Arthroderma gypseum CBS 118893
- Arthroderma otae CBS 113480
- Talaromyces stipitatus ATCC 10500
- Neosartorya fischeri
- Emericella nidulans
- Penicillium chrysogenum Wisconsin 54 1255
- Penicillium marneffei ATCC 18224
- Aspergillus clavatus
- Aspergillus flavus
- Aspergillus oryzae
- Aspergillus niger
- Aspergillus fumigatus
- Aspergillus terreus
- Monosiga brevicollis MX1
- Amphimedon queenslandica
- Trichoplax adhaerens
- Nematostella vectensis
- Hydra magnipapillata
- Schistosoma mansoni
- Trichinella spiralis
- Pristionchus pacificus
- Caenorhabditis breneri
- Caenorhabditis briggsae
- Caenorhabditis remanei
- Caenorhabditis japonica
- Caenorhabditis elegans
- Ixodes scapularis
- Daphnia pulex
- Pediculus humanus
- Acyrtosiphon pisum
- Tribolium castaneum
- Nasonia vitripennis
- Apis mellifera
- Atta cephalotes
- Bombyx mori
- Danaus plexippus
- Heliconius melpomene
- Culex quinquefasciatus
- Aedes aegypti
- Anopheles gambiae
- Anopheles darlingi
- Drosophila virilis
- Drosophila grimshawi
- Drosophila willistoni
- Drosophila pseudoobscura
- Drosophila ananassae
- Drosophila melanogaster
- Drosophila yakuba
- Strongylocentrotus purpuratus
- Branchiostoma floridae
- Ciona intestinalis
- Ciona savignyi
- Petromyzon marinus
- Danio rerio
- Gadus morhua
- Oreochromis niloticus
- Takifugu rubripes
- Tetraodon nigroviridis
- Gasterosteus aculeatus
- Xiphophorus maculatus
- Oryzias latipes
- Latimeria chalumnae
- Xenopus (Silurana) tropicalis
- Pelodiscus sinensis
- Anolis carolinensis
- Taeniopygia guttata
- Gallus gallus
- Meleagris gallopavo
- Ornithorhynchus anatinus
- Monodelphis domestica
- Sarcophilus harrisii
- Macropus eugenii
- Dasyurus novemcinctus
- Loxodonta africana
- Echinops telillari
- Procavia capensis
- Myotis lucifugus
- Pteropus vampyrus
- Sus scrofa
- Tursiops truncatus
- Bos taurus
- Equus caballus
- Felis catus
- Canis lupus familiaris
- Mustela putorius furo
- Alluropoda melanoleuca
- Cryptolestes cuniculus
- Cavia porcellus
- Ictidomys tridecemlineatus
- Dipodomys ordii
- Rattus norvegicus
- Mus musculus
- Tupaia belangeri
- Otolumur garrettii
- Microcebus murinus
- Tarsius syrichta
- Callithrix jacchus
- Macaca mulatta
- Nomascus leucogenys
- Pongo abelii
- Gorilla gorilla
- Pan troglodytes
- Homo sapiens
- Perkinsus marinus ATCC 50983
- Tetrahymena thermophila
- Paramecium tetraurelia strain d4 2
- Neospora caninum Liverpool
- Toxoplasma gondii
- Cryptosporidium muris RN66
- Cryptosporidium parvum Iowa II
- Cryptosporidium hominis TU502
- Theileria annulata strain Ankara
- Theileria parva strain Muguga
- Plasmodium falciparum
- Plasmodium knowlesi
- Plasmodium vivax
- Plasmodium chabaudi
- Plasmodium yoelii yoelii 17XNL
- Plasmodium berghei
- Phaeodactylum tricornutum
- Thalassiosira pseudonana
- Pythium ultimum
- Albugo liliaceae
- Hyaloperonospora arabidopsidis
- Phytophthora ramorum
- Phytophthora infestans
- Phytophthora sojae
- Trypanosoma brucei
- Trypanosoma cruzi strain CL Brener
- Leishmania braziliensis MHOM BR 75 M2904
- Leishmania mexicana MHOM GT 2001 U1103
- Leishmania major
- Leishmania donovani
- Leishmania infantum JPCM5
- Entamoeba histolytica
- Entamoeba dispar SAW760
- Dicystostellum discoideum
- Dicystostellum purpureum
- Trichomonas vaginalis G3
- Trichomonas vaginalis
- Naegleria gruberi
- Giardia lamblia ATCC 50803

- OG presence
- OG absence
- Inferred root

Dscore = 0.778  
Pvalue = 4.23e-04  
AdjPvalue = 5.04e-02

- Arabis thaliana
- Arabidopsis lyrata
- Brassica rapa
- Glycine max
- Populus trichocarpa
- Vitis vinifera
- Solanum tuberosum
- Solanum lycopersicum
- Oryza sativa Indica Group
- Oryza sativa Japonica Group
- Oryza brachyantha
- Oryza glaberrima
- Hordeum vulgare
- Brachypodium distachyon
- Zea mays
- Sorghum bicolor
- Setaria italica
- Musa acuminata
- Salvinella moellendorffii
- Physcomitrella patens
- Ostreococcus tauri
- Ostreococcus lucimarinus CCE9901
- Chlamydomonas reinhardtii
- Cyanidioschyzon merolae
- Encephalitozoon hellem ATCC 50504
- Encephalitozoon intestinalis ATCC 50506
- Encephalitozoon cuniculi GB M1
- Puccinia graminis
- Puccinia triticina
- Ustilago maydis
- Melassezia globosa CBS 7966
- Cryptococcus gattii WM276
- Cryptococcus neoformans var. neoformans JEC21
- Cryptococcus neoformans var. neoformans B 3501A
- Phanerochaete chrysosporium
- Schizophyllum commune H4 B
- Coprinopsis cinerea okayama7\_130
- Laccaria bicolor S238N H82
- Schizosaccharomyces japonicus yFS275
- Schizosaccharomyces pombe
- Clavospora lusitanae ATCC 42720
- Yarrowia lipolytica
- Candida tropicalis MYA 3404
- Candida dubliniensis CD36
- Lodderomyces elongisporus NRRL YB 4239
- Scheffersomyces stipitis CBS 6054
- Meyerozyma guilliermondii ATCC 6260
- Pichia guilliermondii
- Lachancea thermotolerans
- Kluyveromyces fragilis NRRL Y 1140
- Saccharomyces cerevisiae
- Zygosaccharomyces rouxii
- Komagataella pastoris GS115
- Vanderwaltozyma polyspora DSM 70294
- Torulopsis delbrueckii
- Candida glabrata CBS 138
- Tetrapispora phaffii CBS 4417
- Naumovozyma dairensis CBS 421
- Naumovozyma castellii CBS 4309
- Eremothecium cymbalariae DBVPG\_7215
- Eremothecium gossypii
- Tuber melanosporum
- Zymoseptoria tritici
- Phaeosphaeria nodorum
- Leptosphaeria maculans
- Pyrenophora tritici repens Pt 1C BFP
- Pyrenophora teres f. teres 0 1
- Botryotinia fuckeliana
- Sclerotinia sclerotiorum
- Verticillium albo atrum VaMs.102
- Fusarium oxysporum
- Hypocrea virens
- Hypocrea jecorina
- Nectria haematococca
- Gibberella moniliformis
- Gibberella zeae PH 1
- Gibberella zeae
- Gaeumannomyces graminis
- Magnaporthe grisea
- Magnaporthe poae
- Magnaporthe oryzae
- Podospira anserina S mat
- Neurospora crassa
- Sordaria macrospora k hell
- Myceliophthora thermophila ATCC 42464
- Chaetomium globosum CBS 148.51
- Thielavia terrestris NRRL 8126
- Uncinocarpus reesii 1704
- Ajellomyces capsulatus Nam1
- Ajellomyces dermatitidis SLH14081
- Paracoccidioides sp. lutzi Fb01
- Coccidioides posadasii C735 delta SOWgp
- Coccidioides immitis RS
- Trichophyton rubrum CBS 118892
- Trichophyton verrucosum HKI 0517
- Arthroderma benhamiae CBS 112371
- Arthroderma gypseum CBS 118893
- Arthroderma otae CBS 113480
- Talaromyces stipitatus ATCC 10500
- Neosartorya fischeri
- Emericella nidulans
- Penicillium chrysogenum Wisconsin 54 1255
- Penicillium marneffei ATCC 18224
- Aspergillus clavatus
- Aspergillus flavus
- Aspergillus oryzae
- Aspergillus niger
- Aspergillus fumigatus
- Aspergillus terreus
- Monosiga brevicollis MX1
- Amphimedon queenslandica
- Trichoplax adhaerens
- Nematostella vectensis
- Hydra magnipapillata
- Schistosoma mansoni
- Trichinella spiralis
- Pristionchus pacificus
- Caenorhabditis brenneri
- Caenorhabditis briggsae
- Caenorhabditis remanei
- Caenorhabditis japonica
- Caenorhabditis elegans
- Ixodes scapularis
- Daphnia pulex
- Pediculus humanus
- Acyrtosiphon pisum
- Tribolium castaneum
- Nasonia vitripennis
- Apis mellifera
- Atta cephalotes
- Bombyx mori
- Danaus plexippus
- Heliconius melpomene
- Culex quinquefasciatus
- Aedes aegypti
- Anopheles gambiae
- Anopheles darlingi
- Drosophila virilis
- Drosophila grimshawi
- Drosophila willistoni
- Drosophila pseudoobscura
- Drosophila ananassae
- Drosophila melanogaster
- Drosophila yakuba
- Strongylocentrotus purpuratus
- Branchiostoma floridae
- Ciona intestinalis
- Ciona savignyi
- Petromyzon marinus
- Danio rerio
- Gadus morhua
- Oreochromis niloticus
- Takifugu rubripes
- Tetraodon nigroviridis
- Gasterosteus aculeatus
- Xiphophorus maculatus
- Oryzias latipes
- Latimeria chalumnae
- Xenopus (Silurana) tropicalis
- Pelodiscus sinensis
- Anolis carolinensis
- Taeniopygia guttata
- Gallus gallus
- Meleagris gallopavo
- Ornithorhynchus anatinus
- Monodelphis domestica
- Sarcophilus harrisii
- Macropus eugenii
- Dasyurus novemcinctus
- Loxodonta africana
- Echinops telillari
- Procavia capensis
- Myotis lucifugus
- Pteropus vampyrus
- Sus scrofa
- Tursiops truncatus
- Bos taurus
- Equus caballus
- Felis catus
- Canis lupus familiaris
- Mustela putorius furo
- Alluropoda melanoleuca
- Cryptolestes cuniculus
- Cavia porcellus
- Ictidomys tridecemlineatus
- Dipodomys ordii
- Rattus norvegicus
- Mus musculus
- Tupaia belangeri
- Urolemus garrettii
- Microcebus murinus
- Tarsius syrichta
- Callithrix jacchus
- Macaca mulatta
- Nomascus leucogenys
- Pongo abelii
- Gorilla gorilla
- Pan troglodytes
- Homo sapiens
- Perkinsus marinus ATCC 50983
- Tetrahymena thermophila
- Paramecium tetraurelia strain d4 2
- Neospora caninum Liverpool
- Toxoplasma gondii
- Cryptosporidium muris RN66
- Cryptosporidium parvum Iowa II
- Cryptosporidium hominis TU502
- Theileria annulata strain Ankara
- Theileria parva strain Muguga
- Plasmodium falciparum
- Plasmodium knowlesi
- Plasmodium vivax
- Plasmodium chabaudi
- Plasmodium yoelii yoelii 17XNL
- Plasmodium berghei
- Phaeodactylum tricornutum
- Thalassiosira pseudonana
- Pythium ultimum
- Albugo liliaceae
- Hyaloperonospora arabidopsidis
- Phytophthora ramorum
- Phytophthora infestans
- Phytophthora sojae
- Trypanosoma brucei
- Trypanosoma cruzi strain CL Brener
- Leishmania braziliensis MHOM BR 75 M2904
- Leishmania mexicana MHOM GT 2001 U1103
- Leishmania major
- Leishmania donovani
- Leishmania infantum JPCM5
- Entamoeba histolytica
- Entamoeba dispar SAW760
- Dicystostellum discoideum
- Dicystostellum purpureum
- Trichomonas vaginalis G3
- Trichomonas vaginalis
- Naegleria gruberi
- Giardia lamblia ATCC 50803

- OG presence
- OG absence
- Inferred root

Dscore = 0.937  
Pvalue = 2.16e-05  
AdjPvalue = 2.57e-03

- Arabis thaliana
- Arabidopsis lyrata
- Brassica rapa
- Glycine max
- Populus trichocarpa
- Vitis vinifera
- Solanum tuberosum
- Solanum lycopersicum
- Oryza sativa Indica Group
- Oryza sativa Japonica Group
- Oryza brachyantha
- Oryza glaberrima
- Hordeum vulgare
- Brachypodium distachyon
- Zea mays
- Sorghum bicolor
- Setaria italica
- Musa acuminata
- Selaginella moellendorffii
- Physcomitrella patens
- Ostreococcus tauri
- Ostreococcus lucimarinus CCE9901
- Chlamydomonas reinhardtii
- Cyanidioschyzon merolae
- Encephalitozoon hellem ATCC 50504
- Encephalitozoon intestinalis ATCC 50506
- Encephalitozoon cuniculi GB M1
- Puccinia graminis
- Puccinia triticina
- Ustilago maydis
- Melassezia globosa CBS 7966
- Cryptococcus gattii WM276
- Cryptococcus neoformans var. neoformans JEC21
- Cryptococcus neoformans var. neoformans B 3501A
- Phanerochaete chrysosporium
- Schizophyllum commune H4 B
- Coprinopsis cinerea okayama7\_130
- Laccaria bicolor S238N H82
- Schizosaccharomyces japonicus yFS275
- Schizosaccharomyces pombe
- Clavospora lusitanae ATCC 42720
- Yarrowia lipolytica
- Candida tropicalis MYA 3404
- Candida dubliniensis CD36
- Lodderomyces elongisporus NRRL YB 4239
- Scheffersomyces stipitis CBS 6054
- Meyerozyma guilliermondii ATCC 6260
- Pichia guilliermondii
- Lachancea thermotolerans
- Kluyveromyces fragilis NRRL Y 1140
- Saccharomyces cerevisiae
- Zygosaccharomyces rouxii
- Komagataella pastoris GS115
- Vanderwaltozyma polyspora DSM 70294
- Torulopsis delbrueckii
- Candida glabrata CBS 138
- Tetrapispora phaffii CBS 4417
- Naumovozyma dairensis CBS 421
- Naumovozyma castellii CBS 4309
- Eremothecium cymbalariae DBVPG\_7215
- Eremothecium gossypii
- Tuber melanosporum
- Zymoseptoria tritici
- Phaeosphaeria nodorum
- Leptosphaeria maculans
- Pyrenophora tritici repens Pt 1C BFP
- Pyrenophora teres f. teres 0 1
- Botryotinia fuckeliana
- Sclerotinia sclerotiorum
- Verticillium albo atrum VaMs.102
- Fusarium oxysporum
- Hypocrea virens
- Hypocrea jecorina
- Nectria haematococca
- Gibberella moniliformis
- Gibberella zeae PH 1
- Gibberella zeae
- Gaeumannomyces graminis
- Magnaporthe grisea
- Magnaporthe poae
- Magnaporthe oryzae
- Podospira anserina S mat
- Neurospora crassa
- Sordaria macrospora k hell
- Myceliophthora thermophila ATCC 42464
- Chaetomium globosum CBS 148.51
- Thielavia terrestris NRRL 8126
- Uncinocarpus reesii 1704
- Ajellomyces capsulatus Nam1
- Ajellomyces dermatitidis SLH14081
- Paracoccidioides sp. lutzi Fb01
- Coccidioides posadasii C735 delta SOWgp
- Coccidioides immitis RS
- Trichophyton rubrum CBS 118892
- Trichophyton verrucosum HKI 0517
- Arthroderma benhamiae CBS 112371
- Arthroderma gypseum CBS 118893
- Arthroderma otae CBS 113480
- Talaromyces stipitatus ATCC 10500
- Neosartorya fischeri
- Emericella nidulans
- Penicillium chrysogenum Wisconsin 54 1255
- Penicillium marneffei ATCC 18224
- Aspergillus clavatus
- Aspergillus flavus
- Aspergillus oryzae
- Aspergillus niger
- Aspergillus fumigatus
- Aspergillus terreus
- Monosiga brevicollis MX1
- Amphimedon queenslandica
- Trichoplax adhaerens
- Nematostella vectensis
- Hydra magnipapillata
- Schistosoma mansoni
- Trichinella spiralis
- Pristionchus pacificus
- Caenorhabditis breneri
- Caenorhabditis briggsae
- Caenorhabditis remanei
- Caenorhabditis japonica
- Caenorhabditis elegans
- Ixodes scapularis
- Daphnia pulex
- Pediculus humanus
- Acyrtosiphon pisum
- Tribolium castaneum
- Nasonia vitripennis
- Apis mellifera
- Atta cephalotes
- Bombyx mori
- Danaus plexippus
- Heliconia melpomene
- Culex quinquefasciatus
- Aedes aegypti
- Anopheles gambiae
- Anopheles darlingi
- Drosophila virilis
- Drosophila grimshawi
- Drosophila willistoni
- Drosophila pseudoobscura
- Drosophila ananassae
- Drosophila melanogaster
- Drosophila yakuba
- Strongylocentrotus purpuratus
- Branchiostoma floridae
- Ciona intestinalis
- Ciona savignyi
- Petromyzon marinus
- Danio rerio
- Gadus morhua
- Oreochromis niloticus
- Takifugu rubripes
- Tetraodon nigroviridis
- Gasterosteus aculeatus
- Xiphophorus maculatus
- Oryzias latipes
- Latimeria chalumnae
- Xenopus (Silurana) tropicalis
- Pelodiscus sinensis
- Anolis carolinensis
- Taeniopygia guttata
- Gallus gallus
- Meleagris gallopavo
- Ornithorhynchus anatinus
- Monodelphis domestica
- Sarcophilus harrisii
- Macropus eugenii
- Dasyurus novemcinctus
- Loxodonta africana
- Echinosorex tillarii
- Procavia capensis
- Myotis lucifugus
- Pteropus vampyrus
- Sus scrofa
- Tursiops truncatus
- Bos taurus
- Equus caballus
- Felis catus
- Canis lupus familiaris
- Mustela putorius furo
- Alluropoda melanoleuca
- Cryptolestes cuniculus
- Cavia porcellus
- Ictidomys tridecemlineatus
- Dipodomys ordii
- Rattus norvegicus
- Mus musculus
- Tupaia belangeri
- Otolomus garrettii
- Microcebus murinus
- Tarsius syrichta
- Callithrix jacchus
- Macaca mulatta
- Nomascus leucogenys
- Pongo abelii
- Gorilla gorilla
- Pan troglodytes
- Homo sapiens
- Perkinsus marinus ATCC 50983
- Tetrahymena thermophila
- Paramecium tetraurelia strain d4 2
- Neospora caninum Liverpool
- Toxoplasma gondii
- Cryptosporidium muris RN66
- Cryptosporidium parvum Iowa II
- Cryptosporidium hominis TU502
- Theileria annulata strain Ankara
- Theileria parva strain Muguga
- Plasmodium falciparum
- Plasmodium knowlesi
- Plasmodium vivax
- Plasmodium chabaudi
- Plasmodium yoelii yoelii 17XNL
- Plasmodium berghei
- Phaeodactylum tricornutum
- Thalassiosira pseudonana
- Pythium ultimum
- Albugo liliaceae
- Hyaloperonospora arabidopsidis
- Phytophthora ramorum
- Phytophthora infestans
- Phytophthora sojae
- Trypanosoma brucei
- Trypanosoma cruzi strain CL Brener
- Leishmania braziliensis MHOM BR 75 M2904
- Leishmania mexicana MHOM GT 2001 U1103
- Leishmania major
- Leishmania donovani
- Leishmania infantum JPCM5
- Entamoeba histolytica
- Entamoeba dispar SAW760
- Dicystostellum discoideum
- Dicystostellum purpureum
- Trichomonas vaginalis G3
- Trichomonas vaginalis
- Naegleria gruberi
- Giardia lamblia ATCC 50803

- OG presence
- OG absence
- Inferred root

Dscore = 0.994

Pvalue = 1.39e-05

AdjPvalue = 1.65e-03

- Arabis thaliana
- Arabidopsis lyrata
- Brassica rapa
- Glycine max
- Populus trichocarpa
- Vitis vinifera
- Solanum tuberosum
- Solanum lycopersicum
- Oryza sativa Indica Group
- Oryza sativa Japonica Group
- Oryza brachyantha
- Oryza glaberrima
- Hordeum vulgare
- Brachypodium distachyon
- Zea mays
- Sorghum bicolor
- Setaria italica
- Musa acuminata
- Salvinella moellendorffii
- Physcomitrella patens
- Ostreococcus tauri
- Ostreococcus lucimarinus CCE9901
- Chlamydomonas reinhardtii
- Cyanidioschyzon merolae
- Encephalitozoon hellem ATCC 50504
- Encephalitozoon intestinalis ATCC 50506
- Encephalitozoon cuniculi GB M1
- Puccinia graminis
- Puccinia triticina
- Ustilago maydis
- Melassezia globosa CBS 7966
- Cryptococcus gattii WM276
- Cryptococcus neoformans var. neoformans JEC21
- Cryptococcus neoformans var. neoformans B 3501A
- Phanerochaete chrysosporium
- Schizophyllum commune H4 B
- Coprinopsis cinerea okayama7\_130
- Laccaria bicolor S238N H82
- Schizosaccharomyces japonicus yFS275
- Schizosaccharomyces pombe
- Clavospora lusitanae ATCC 42720
- Yarrowia lipolytica
- Candida tropicalis MYA 3404
- Candida dubliniensis CD36
- Lodderomyces elongisporus NRRL YB 4239
- Scheffersomyces stipitis CBS 6054
- Meyerozyma guilliermondii ATCC 6260
- Pichia guilliermondii
- Lachancea thermotolerans
- Kluyveromyces fragilis NRRL Y 1140
- Saccharomyces cerevisiae
- Zygosaccharomyces rouxii
- Komagataella pastoris GS115
- Vanderwaltozyma polyspora DSM 70294
- Torulopsis delbrueckii
- Candida glabrata CBS 138
- Tetrapispora phaffii CBS 4417
- Naumovozyma dairensis CBS 421
- Naumovozyma castellii CBS 4309
- Eremothecium cymbalariae DBVPG\_7215
- Eremothecium gossypii
- Tuber melanosporum
- Zymoseptoria tritici
- Phaeosphaeria nodorum
- Leptosphaeria maculans
- Pyrenophora tritici repens Pt 1C BFP
- Pyrenophora teres f. teres 0 1
- Botryotinia fuckeliana
- Sclerotinia sclerotiorum
- Verticillium albo atrum VaMs.102
- Fusarium oxysporum
- Hypocrea virens
- Hypocrea jecorina
- Nectria haematococca
- Gibberella moniliformis
- Gibberella zeae PH 1
- Gibberella zeae
- Gaeumannomyces graminis
- Magnaporthe grisea
- Magnaporthe poae
- Magnaporthe oryzae
- Podospira anserina S mat
- Neurospora crassa
- Sordaria macrospora k hell
- Myceliophthora thermophila ATCC 42464
- Chaetomium globosum CBS 148.51
- Thielavia terrestris NRRL 8126
- Uncinocarpus reesii 1704
- Ajellomyces capsulatus Nam1
- Ajellomyces dermatitidis SLH14081
- Paracoccidioides sp. lutzi Fb01
- Coccidioides posadasii C735 delta SOWgp
- Coccidioides immitis RS
- Trichophyton rubrum CBS 118892
- Trichophyton verrucosum HKI 0517
- Arthroderma benhamiae CBS 112371
- Arthroderma gypseum CBS 118893
- Arthroderma otae CBS 113480
- Talaromyces stipitatus ATCC 10500
- Neosartorya fischeri
- Emericella nidulans
- Penicillium chrysogenum Wisconsin 54 1255
- Penicillium marneffei ATCC 18224
- Aspergillus clavatus
- Aspergillus flavus
- Aspergillus oryzae
- Aspergillus niger
- Aspergillus fumigatus
- Aspergillus terreus
- Monosiga brevicollis MX1
- Amphimedon queenslandica
- Trichoplax adhaerens
- Nematostella vectensis
- Hydra magnipapillata
- Schistosoma mansoni
- Trichinella spiralis
- Pristionchus pacificus
- Caenorhabditis brenneri
- Caenorhabditis briggsae
- Caenorhabditis remanei
- Caenorhabditis japonica
- Caenorhabditis elegans
- Ixodes scapularis
- Daphnia pulex
- Pediculus humanus
- Acyrtosiphon pisum
- Tribolium castaneum
- Nasonia vitripennis
- Apis mellifera
- Atta cephalotes
- Bombyx mori
- Danaus plexippus
- Heliconia melpomene
- Culex quinquefasciatus
- Aedes aegypti
- Anopheles gambiae
- Anopheles darlingi
- Drosophila virilis
- Drosophila grimshawi
- Drosophila willistoni
- Drosophila pseudoobscura
- Drosophila ananassae
- Drosophila melanogaster
- Drosophila yakuba
- Strongylocentrotus purpuratus
- Branchiostoma floridae
- Ciona intestinalis
- Ciona savignyi
- Petromyzon marinus
- Danio rerio
- Gadus morhua
- Oreochromis niloticus
- Takifugu rubripes
- Tetraodon nigroviridis
- Gasterosteus aculeatus
- Xiphophorus maculatus
- Oryzias latipes
- Latimeria chalumnae
- Xenopus (Silurana) tropicalis
- Pelodiscus sinensis
- Anolis carolinensis
- Taeniopygia guttata
- Gallus gallus
- Meleagris gallopavo
- Ornithorhynchus anatinus
- Monodelphis domestica
- Sarcophilus harrisii
- Macropus eugenii
- Dasyurus novemcinctus
- Loxodonta africana
- Echinops telillari
- Procavia capensis
- Myotis lucifugus
- Pteropus vampyrus
- Sus scrofa
- Tursiops truncatus
- Bos taurus
- Equus caballus
- Felis catus
- Canis lupus familiaris
- Mustela putorius furo
- Alluropoda melanoleuca
- Cryptolestes cuniculus
- Cavia porcellus
- Ictidomys tridecemlineatus
- Dipodomys ordii
- Rattus norvegicus
- Mus musculus
- Tupaia belangeri
- Otolomus garretti
- Microcebus murinus
- Tarsius syrichta
- Callithrix jacchus
- Macaca mulatta
- Nomascus leucogenys
- Pongo abelii
- Gorilla gorilla
- Pan troglodytes
- Homo sapiens
- Perkinsus marinus ATCC 50983
- Tetrahymena thermophila
- Paramecium tetraurelia strain d4 2
- Neospora caninum Liverpool
- Toxoplasma gondii
- Cryptosporidium muris RN66
- Cryptosporidium parvum Iowa II
- Cryptosporidium hominis TU502
- Theileria annulata strain Ankara
- Theileria parva strain Muguga
- Plasmodium falciparum
- Plasmodium knowlesi
- Plasmodium vivax
- Plasmodium chabaudi
- Plasmodium yoelii yoelii 17XNL
- Plasmodium berghei
- Phaeodactylum tricornutum
- Thalassiosira pseudonana
- Pythium ultimum
- Albugo liliaceae
- Hyaloperonospora arabidopsidis
- Phytophthora ramorum
- Phytophthora infestans
- Phytophthora sojae
- Trypanosoma brucei
- Trypanosoma cruzi strain CL Brener
- Leishmania braziliensis MHOM BR 75 M2904
- Leishmania mexicana MHOM GT 2001 U1103
- Leishmania major
- Leishmania donovani
- Leishmania infantum JPCM5
- Entamoeba histolytica
- Entamoeba dispar SAW760
- Dicystostellum discoideum
- Dicystostellum purpureum
- Trichomonas vaginalis G3
- Trichomonas vaginalis
- Naegleria gruberi
- Giardia lamblia ATCC 50803

- OG presence
- OG absence
- Inferred root

Dscore = 1  
Pvalue = 4.24e-06  
AdjPvalue = 5.05e-04

- Arabis thaliana
- Arabidopsis lyrata
- Brassica rapa
- Glycine max
- Populus trichocarpa
- Vitis vinifera
- Solanum tuberosum
- Solanum lycopersicum
- Oryza sativa Indica Group
- Oryza sativa Japonica Group
- Oryza brachyantha
- Oryza glaberrima
- Hordeum vulgare
- Brachypodium distachyon
- Zea mays
- Sorghum bicolor
- Setaria italica
- Musa acuminata
- Selaginella moellendorffii
- Physcomitrella patens
- Ostreococcus tauri
- Ostreococcus lucimarinus CCE9901
- Chlamydomonas reinhardtii
- Cyanidioschyzon merolae
- Encephalitozoon hellem ATCC 50504
- Encephalitozoon intestinalis ATCC 50506
- Encephalitozoon cuniculi GB M1
- Puccinia graminis
- Puccinia triticina
- Ustilago maydis
- Malassezia globosa CBS 7966
- Cryptococcus gattii WM276
- Cryptococcus neoformans var. neoformans JEC21
- Cryptococcus neoformans var. neoformans B 3501A
- Phanerochaete chrysosporium
- Schizophyllum commune H4 B
- Coprinopsis cinerea okayama7\_130
- Laccaria bicolor S238N H82
- Schizosaccharomyces japonicus yFS275
- Schizosaccharomyces pombe
- Clavospora lusitanae ATCC 42720
- Yarrowia lipolytica
- Candida tropicalis MYA 3404
- Candida dubliniensis CD36
- Lodderomyces elongisporus NRRL YB 4239
- Scheffersomyces stipitis CBS 6054
- Meyerozyma guilliermondii ATCC 6260
- Pichia guilliermondii
- Lachancea thermotolerans
- Kluyveromyces fragilis NRRL Y 1140
- Saccharomyces cerevisiae
- Zygosaccharomyces rouxii
- Komagataella pastoris GS115
- Vanderwaltozyma polyspora DSM 70294
- Torulopsis delbrueckii
- Candida glabrata CBS 138
- Tetrapispora phaffii CBS 4417
- Naumovozyma dairensis CBS 421
- Naumovozyma castellii CBS 4309
- Eremothecium cymbalariae DBVPG\_7215
- Eremothecium gossypii
- Tuber melanosporum
- Zymoseptoria tritici
- Phaeosphaeria nodorum
- Leptosphaeria maculans
- Pyrenophora tritici repens Pt 1C BFP
- Pyrenophora teres f. teres 0 1
- Botryotinia fuckeliana
- Sclerotinia sclerotiorum
- Verticillium albo atrum VaMs.102
- Fusarium oxysporum
- Hypocrea virens
- Hypocrea jecorina
- Nectria haematococca
- Gibberella moniliformis
- Gibberella zeae PH 1
- Gibberella zeae
- Gaeumannomyces graminis
- Magnaporthe grisea
- Magnaporthe poae
- Magnaporthe oryzae
- Podospira anserina S mat
- Neurospora crassa
- Sordaria macrospora k hell
- Myceliophthora thermophila ATCC 42464
- Chaetomium globosum CBS 148.51
- Thielavia terrestris NRRL 8126
- Uncinocarpus reesii 1704
- Ajellomyces capsulatus Nam1
- Ajellomyces dermatitidis SLH14081
- Paracoccidioides sp. lutzi Fb01
- Coccidioides posadasii C735 delta SOWgp
- Coccidioides immitis RS
- Trichophyton rubrum CBS 118892
- Trichophyton verrucosum HKI 0517
- Arthroderma benhamiae CBS 112371
- Arthroderma gypseum CBS 118893
- Arthroderma otae CBS 113480
- Talaromyces stipitatus ATCC 10500
- Neosartorya fischeri
- Emericella nidulans
- Penicillium chrysogenum Wisconsin 54 1255
- Penicillium marneffei ATCC 18224
- Aspergillus clavatus
- Aspergillus flavus
- Aspergillus oryzae
- Aspergillus niger
- Aspergillus fumigatus
- Aspergillus terreus
- Monosiga brevicollis MX1
- Amphimedon queenslandica
- Trichoplax adhaerens
- Nematostella vectensis
- Hydra magnipapillata
- Schistosoma mansoni
- Trichinella spiralis
- Pristionchus pacificus
- Caenorhabditis brenneri
- Caenorhabditis briggsae
- Caenorhabditis remanei
- Caenorhabditis japonica
- Caenorhabditis elegans
- Ixodes scapularis
- Daphnia pulex
- Pediculus humanus
- Acyrtosiphon pisum
- Tribolium castaneum
- Nasonia vitripennis
- Apis mellifera
- Atta cephalotes
- Bombyx mori
- Danaus plexippus
- Heliconius melpomene
- Culex quinquefasciatus
- Aedes aegypti
- Anopheles gambiae
- Anopheles darlingi
- Drosophila virilis
- Drosophila grimshawi
- Drosophila willistoni
- Drosophila pseudoobscura
- Drosophila ananassae
- Drosophila melanogaster
- Drosophila yakuba
- Strongylocentrotus purpuratus
- Branchiostoma floridae
- Ciona intestinalis
- Ciona savignyi
- Petromyzon marinus
- Danio rerio
- Gadus morhua
- Oreochromis niloticus
- Takifugu rubripes
- Tetraodon nigroviridis
- Gasterosteus aculeatus
- Xiphophorus maculatus
- Oryzias latipes
- Latimeria chalumnae
- Xenopus (Silurana) tropicalis
- Pelodiscus sinensis
- Anolis carolinensis
- Taeniopygia guttata
- Gallus gallus
- Meleagris gallopavo
- Ornithorhynchus anatinus
- Monodelphis domestica
- Sarcophilus harrisii
- Macropus eugenii
- Dasyurus novemcinctus
- Loxodonta africana
- Echinosorex tillarii
- Procavia capensis
- Myotis lucifugus
- Pteropus vampyrus
- Sus scrofa
- Tursiops truncatus
- Bos taurus
- Equus caballus
- Felis catus
- Canis lupus familiaris
- Mustela putorius furo
- Alluropoda melanoleuca
- Cryptolestes cuniculus
- Cavia porcellus
- Ictidomys tridecemlineatus
- Dipodomys ordii
- Rattus norvegicus
- Mus musculus
- Tupaia belangeri
- Otolomus garretti
- Microcebus murinus
- Tarsius syrichta
- Callithrix jacchus
- Macaca mulatta
- Nomascus leucogenys
- Pongo abelii
- Gorilla gorilla
- Pan troglodytes
- Homo sapiens
- Perkinsus marinus ATCC 50983
- Tetrahymena thermophila
- Paramecium tetraurelia strain d4 2
- Neospora caninum Liverpool
- Toxoplasma gondii
- Cryptosporidium muris RN66
- Cryptosporidium parvum Iowa II
- Cryptosporidium hominis TU502
- Theileria annulata strain Ankara
- Theileria parva strain Muguga
- Plasmodium falciparum
- Plasmodium knowlesi
- Plasmodium vivax
- Plasmodium chabaudi
- Plasmodium yoelii yoelii 17XNL
- Plasmodium berghei
- Phaeodactylum tricornutum
- Thalassiosira pseudonana
- Pythium ultimum
- Albugo liliaceae
- Hyaloperonospora arabidopsidis
- Phytophthora ramorum
- Phytophthora infestans
- Phytophthora sojae
- Trypanosoma brucei
- Trypanosoma cruzi strain CL Brener
- Leishmania braziliensis MHOM BR 75 M2904
- Leishmania mexicana MHOM GT 2001 U1103
- Leishmania major
- Leishmania donovani
- Leishmania infantum JPCM5
- Entamoeba histolytica
- Entamoeba dispar SAW760
- Dicystostellum discoideum
- Dicystostellum purpureum
- Trichomonas vaginalis G3
- Trichomonas vaginalis
- Naegleria gruberi
- Giardia lamblia ATCC 50803

- OG presence
- OG absence
- Inferred root

Dscore = 0.993  
Pvalue = 1.13e-05  
AdjPvalue = 1.34e-03

- Arabis thaliana
- Arabidopsis lyrata
- Brassica rapa
- Glycine max
- Populus trichocarpa
- Vitis vinifera
- Solanum tuberosum
- Solanum lycopersicum
- Oryza sativa Indica Group
- Oryza sativa Japonica Group
- Oryza brachyantha
- Oryza glaberrima
- Hordeum vulgare
- Brachypodium distachyon
- Zea mays
- Sorghum bicolor
- Setaria italica
- Musa acuminata
- Salvinella moellendorffii
- Physcomitrella patens
- Ostreococcus tauri
- Ostreococcus lucimarinus CCE9901
- Chlamydomonas reinhardtii
- Cyanidioschyzon merolae
- Encephalitozoon hellem ATCC 50504
- Encephalitozoon intestinalis ATCC 50506
- Encephalitozoon cuniculi GB M1
- Puccinia graminis
- Puccinia triticina
- Ustilago maydis
- Melassezia globosa CBS 7966
- Cryptococcus gattii WM276
- Cryptococcus neoformans var. neoformans JEC21
- Cryptococcus neoformans var. neoformans B 3501A
- Phanerochaete chrysosporium
- Schizophyllum commune H4 B
- Coprinopsis cinerea okayama7\_130
- Laccaria bicolor S238N H82
- Schizosaccharomyces japonicus yFS275
- Schizosaccharomyces pombe
- Clavospora lusitanae ATCC 42720
- Yarrowia lipolytica
- Candida tropicalis MYA 3404
- Candida dubliniensis CD36
- Lodderomyces elongisporus NRRL YB 4239
- Scheffersomyces stipitis CBS 6054
- Meyerozyma guilliermondii ATCC 6260
- Pichia guilliermondii
- Lachancea thermotolerans
- Kluyveromyces fragilis NRRL Y 1140
- Saccharomyces cerevisiae
- Zygosaccharomyces rouxii
- Komagataella pastoris GS115
- Vanderwaltozyma polyspora DSM 70294
- Torulopsis delbrueckii
- Candida glabrata CBS 138
- Tetrapispora phaffii CBS 4417
- Naumovozyma dairensis CBS 421
- Naumovozyma castellii CBS 4309
- Eremothecium cymbalariae DBVPG\_7215
- Eremothecium gossypii
- Tuber melanosporum
- Zymoseptoria tritici
- Phaeosphaeria nodorum
- Leptosphaeria maculans
- Pyrenophora tritici repens Pt 1C BFP
- Pyrenophora teres f. teres 0 1
- Botryotinia fuckeliana
- Sclerotinia sclerotiorum
- Verticillium albo atrum VaMs.102
- Fusarium oxysporum
- Hypocrea virens
- Hypocrea jecorina
- Nectria haematococca
- Gibberella moniliformis
- Gibberella zeae PH 1
- Gibberella zeae
- Gaeumannomyces graminis
- Magnaporthe grisea
- Magnaporthe poae
- Magnaporthe oryzae
- Podospira anserina S mat
- Neurospora crassa
- Sordaria macrospora k hell
- Myceliophthora thermophila ATCC 42464
- Chaetomium globosum CBS 148.51
- Thielavia terrestris NRRL 8126
- Uncinocarpus reesii 1704
- Ajellomyces capsulatus Nam1
- Ajellomyces dermatitidis SLH14081
- Paracoccidioides sp. lutzi Fb01
- Coccidioides posadasii C735 delta SOWgp
- Coccidioides immitis RS
- Trichophyton rubrum CBS 118892
- Trichophyton verrucosum HKI 0517
- Arthroderma benhamiae CBS 112371
- Arthroderma gypseum CBS 118893
- Arthroderma otae CBS 113480
- Talaromyces stipitatus ATCC 10500
- Neosartorya fischeri
- Emericella nidulans
- Penicillium chrysogenum Wisconsin 54 1255
- Penicillium marneffei ATCC 18224
- Aspergillus clavatus
- Aspergillus flavus
- Aspergillus oryzae
- Aspergillus niger
- Aspergillus fumigatus
- Aspergillus terreus
- Monosiga brevicollis MX1
- Amphimedon queenslandica
- Trichoplax adhaerens
- Nematostella vectensis
- Hydra magnipapillata
- Schistosoma mansoni
- Trichiella spiralis
- Pristionchus pacificus
- Caenorhabditis brenneri
- Caenorhabditis briggsae
- Caenorhabditis remanei
- Caenorhabditis japonica
- Caenorhabditis elegans
- Ixodes scapularis
- Daphnia pulex
- Pediculus humanus
- Acyrtosiphon pisum
- Tribolium castaneum
- Nasonia vitripennis
- Apis mellifera
- Atta cephalotes
- Bombyx mori
- Danaus plexippus
- Heliconius melpomene
- Culex quinquefasciatus
- Aedes aegypti
- Anopheles gambiae
- Anopheles darlingi
- Drosophila virilis
- Drosophila grimshawi
- Drosophila willistoni
- Drosophila pseudoobscura
- Drosophila ananassae
- Drosophila melanogaster
- Drosophila yakuba
- Strongylocentrotus purpuratus
- Branchiostoma floridae
- Ciona intestinalis
- Ciona savignyi
- Petromyzon marinus
- Danio rerio
- Gadus morhua
- Oreochromis niloticus
- Takifugu rubripes
- Tetraodon nigroviridis
- Gasterosteus aculeatus
- Xiphophorus maculatus
- Oryzias latipes
- Latimeria chalumnae
- Xenopus (Silurana) tropicalis
- Pelodiscus sinensis
- Anolis carolinensis
- Taeniopygia guttata
- Gallus gallus
- Meleagris gallopavo
- Ornithorhynchus anatinus
- Monodelphis domestica
- Sarcophilus harrisii
- Macropus eugenii
- Dasyurus novemcinctus
- Loxodonta africana
- Echinops telillari
- Procavia capensis
- Myotis lucifugus
- Pteropus vampyrus
- Sus scrofa
- Tursiops truncatus
- Bos taurus
- Equus caballus
- Felis catus
- Canis lupus familiaris
- Mustela putorius furo
- Alluropoda melanoleuca
- Cryptolestes cuniculus
- Cavia porcellus
- Ictidomys tridecemlineatus
- Dipodomys ordii
- Rattus norvegicus
- Mus musculus
- Tupaia belangeri
- Otolomus garrettii
- Microcebus murinus
- Tarsius syrichta
- Callithrix jacchus
- Macaca mulatta
- Nomascus leucogenys
- Pongo abelii
- Gorilla gorilla
- Pan troglodytes
- Homo sapiens
- Perkinsus marinus ATCC 50983
- Tetrahymena thermophila
- Paramecium tetraurelia strain d4 2
- Neospora caninum Liverpool
- Toxoplasma gondii
- Cryptosporidium muris RN66
- Cryptosporidium parvum Iowa II
- Cryptosporidium hominis TU502
- Theileria annulata strain Ankara
- Theileria parva strain Muguga
- Plasmodium falciparum
- Plasmodium knowlesi
- Plasmodium vivax
- Plasmodium chabaudi
- Plasmodium yoelii yoelii 17XNL
- Plasmodium berghei
- Phaeodactylum tricornutum
- Thalassiosira pseudonana
- Pythium ultimum
- Albugo laluchii
- Hyaloperonospora arabidopsidis
- Phytophthora ramorum
- Phytophthora infestans
- Phytophthora sojae
- Trypanosoma brucei
- Trypanosoma cruzi strain CL Brener
- Leishmania braziliensis MHOM BR 75 M2904
- Leishmania mexicana MHOM GT 2001 U1103
- Leishmania major
- Leishmania donovani
- Leishmania infantum JPCM5
- Entamoeba histolytica
- Entamoeba dispar SAW760
- Dicystostellum discoideum
- Dicystostellum purpureum
- Trichomonas vaginalis G3
- Trichomonas vaginalis
- Naegleria gruberi
- Giardia lamblia ATCC 50803

- OG presence
- OG absence
- Inferred root

Dscore = 1  
Pvalue = 3.76e-06  
AdjPvalue = 4.48e-04



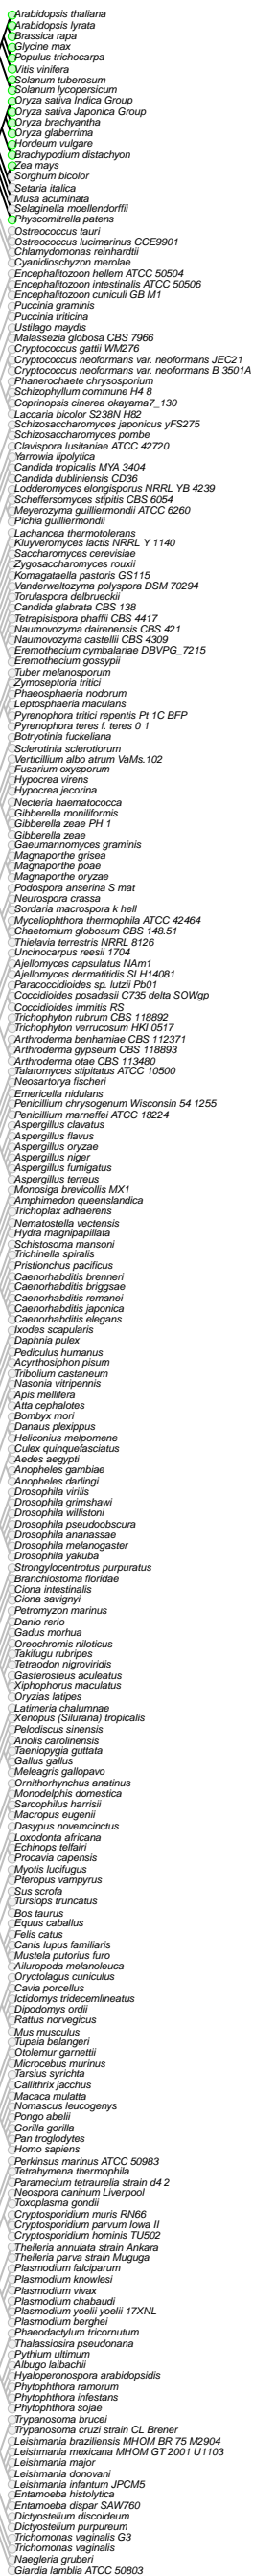

● OG presence  
 ○ OG absence  
 ◆ Inferred root

Dscore = 0.869  
 Pvalue = 9.18e-05  
 AdjPvalue = 1.09e-02

# NOG18420

- Arabidopsis thaliana
- Arabidopsis lyrata
- Brassica rapa
- Glycine max
- Populus trichocarpa
- Vitis vinifera
- Solanum tuberosum
- Solanum lycopersicum
- Oryza sativa Indica Group
- Oryza sativa Japonica Group
- Oryza brachyantha
- Oryza glaberrima
- Hordeum vulgare
- Brachypodium distachyon
- Zea mays
- Sorghum bicolor
- Setaria italica
- Musa acuminata
- Selaginella moellendorffii
- Physcomitrella patens
- Ostreococcus tauri
- Ostreococcus lucimarinus CCE9901
- Chlamydomonas reinhardtii
- Cyanidioschyzon merolae
- Encephalitozoon hellem ATCC 50504
- Encephalitozoon intestinalis ATCC 50506
- Encephalitozoon cuniculi GB M1
- Puccinia graminis
- Puccinia triticina
- Ustilago maydis
- Malassezia globosa CBS 7966
- Cryptococcus gattii WM276
- Cryptococcus neoformans var. neoformans JEC21
- Cryptococcus neoformans var. neoformans B 3501A
- Phanerochaete chrysosporium
- Schizophyllum commune H4 B
- Coprinopsis cinerea okayama7\_130
- Laccaria bicolor S238N H82
- Schizosaccharomyces japonicus yFS275
- Schizosaccharomyces pombe
- Clavospora lusitanae ATCC 42720
- Yarrowia lipolytica
- Candida tropicalis MYA 3404
- Candida dubliniensis CD36
- Lodderomyces elongisporus NRRL YB 4239
- Scheffersomyces stipitis CBS 6054
- Meyeromyza guilliermondii ATCC 6260
- Pichia guilliermondii
- Lachancea thermotolerans
- Kluyveromyces fragilis NRRL Y 1140
- Saccharomyces cerevisiae
- Zygosaccharomyces rouxii
- Komagataella pastoris GS115
- Vanderwaltozyma polyspora DSM 70294
- Torulopsis delbrueckii
- Candida glabrata CBS 138
- Tetrapispora phaffii CBS 4417
- Naumovozyma dairenensis CBS 421
- Naumovozyma castellii CBS 4309
- Eremothecium cymbalariae DBVPG\_7215
- Eremothecium gossypii
- Tuber melanosporum
- Zymoseptoria tritici
- Phaeosphaeria nodorum
- Leptosphaeria maculans
- Pyrenophora tritici repens Pt 1C BFP
- Pyrenophora teres f. teres 0 1
- Botryotinia fuckeliana
- Sclerotinia sclerotiorum
- Verticillium albo atrum VaMs.102
- Fusarium oxysporum
- Hypocrea virens
- Hypocrea jecorina
- Nectria haematococca
- Gibberella moniformis
- Gibberella zeae PH 1
- Gibberella zeae
- Gaeumannomyces graminis
- Magnaporthe grisea
- Magnaporthe poae
- Magnaporthe oryzae
- Podospora anserina S mat
- Neurospora crassa
- Sordaria macrospora k hell
- Mycelophthora thermophila ATCC 42464
- Chaetomium globosum CBS 148.51
- Thielavia terrestris NRRL 8126
- Uncinocarpus reesii 1704
- Ajellomyces capsulatus Nam1
- Ajellomyces dermatitidis SLH14081
- Paracoccidioides sp. lutzi Pb01
- Coccidioides posadasii C735 delta SOWgp
- Coccidioides immitis RS
- Trichophyton rubrum CBS 118892
- Trichophyton verrucosum HKI 0517
- Arthroderma benhamiae CBS 112371
- Arthroderma gypseum CBS 118893
- Arthroderma otae CBS 113480
- Talaromyces stipitatus ATCC 10500
- Neosartorya fischeri
- Emericella nidulans
- Penicillium chrysogenum Wisconsin 54 1255
- Penicillium marneffei ATCC 18224
- Aspergillus clavatus
- Aspergillus flavus
- Aspergillus oryzae
- Aspergillus niger
- Aspergillus fumigatus
- Aspergillus terreus
- Monosiga brevicollis MX1
- Amphimedon queenslandica
- Trichoplax adhaerens
- Nematostella vectensis
- Hydra magnipapillata
- Schistosoma mansoni
- Trichiella spiralis
- Pristionchus pacificus
- Caenorhabditis brenneri
- Caenorhabditis briggsae
- Caenorhabditis remanei
- Caenorhabditis japonica
- Caenorhabditis elegans
- Drosophila melanogaster
- Drosophila yakuba
- Drosophila obscura
- Drosophila ananassae
- Drosophila melanogaster
- Drosophila yakuba
- Strongylocentrotus purpuratus
- Branchiostoma floridae
- Ciona intestinalis
- Ciona savignyi
- Petromyzon marinus
- Danio rerio
- Gadus morhua
- Oreochromis niloticus
- Takifugu rubripes
- Tetraodon nigroviridis
- Gasterosteus aculeatus
- Xiphophorus maculatus
- Dryzius latipes
- Latimeria chalumnae
- Xenopus (Silurana) tropicalis
- Pelodiscus sinensis
- Anolis carolinensis
- Taeniopygia guttata
- Gallus gallus
- Meleagris gallopavo
- Ornithorhynchus anatinus
- Monodelphis domestica
- Sarcophilus harrisii
- Macropus eugenii
- Dasyurus novemcinctus
- Loxodonta africana
- Echinops telfairii
- Procavia capensis
- Myotis lucifugus
- Pteropus vampyrus
- Sus scrofa
- Turdus truncatus
- Bos taurus
- Equus caballus
- Felis catus
- Canis lupus familiaris
- Mustela putorius furo
- Alluopoda melanoleuca
- Cryptolegus cuniculatus
- Cavia porcellus
- Ictidomys tridecemlineatus
- Dipodomys ordii
- Rattus norvegicus
- Mus musculus
- Tupia belangerii
- Otolomus garrettii
- Microcebus murinus
- Tarsius syrichta
- Callithrix jacchus
- Macaca mulatta
- Nomascus leucogenys
- Pongo abelii
- Gorilla gorilla
- Pan troglodytes
- Homo sapiens
- Perkinsus marinus ATCC 50983
- Tetrahymena thermophila
- Paramecium tetraurelia strain d4 2
- Neospora caninum Liverpool
- Toxoplasma gondii
- Cryptosporidium muris RN66
- Cryptosporidium parvum Iowa II
- Cryptosporidium hominis TU502
- Theileria annulata strain Ankara
- Theileria parva strain Muguga
- Plasmodium falciparum
- Plasmodium knowlesi
- Plasmodium vivax
- Plasmodium chabaudi
- Plasmodium yoelii yoelii 17XNL
- Plasmodium berghei
- Phaeodactylum tricornutum
- Thalassiosira pseudonana
- Pythium ultimum
- Albugo falabachii
- Hyaloperonospora arabidopsidis
- Phytophthora ramorum
- Phytophthora infestans
- Phytophthora sojae
- Trypanosoma brucei
- Trypanosoma cruzi strain CL Brener
- Leishmania braziliensis MHOM BR 75 M2904
- Leishmania mexicana MHOM GT 2001 U1103
- Leishmania major
- Leishmania donovani
- Leishmania infantum JPCM5
- Entamoeba histolytica
- Entamoeba dispar SAW760
- Dictyostellium discoideum
- Dictyostellium purpureum
- Trichomonas vaginalis G3
- Trichomonas vaginalis
- Naegleria gruberi
- Giardia lamblia ATCC 50803

- OG presence
- OG absence
- ◇ Inferred root

Dscore = 0.794

Pvalue = 6.79e-04

AdjPvalue = 8.08e-02

- Arabidopsis thaliana
- Arabidopsis lyrata
- Brassica rapa
- Glycine max
- ◆ Populus trichocarpa
- Vitis vinifera
- Solanum tuberosum
- Solanum lycopersicum
- Oryza sativa Indica Group
- Oryza sativa Japonica Group
- Oryza brachyantha
- Oryza glaberrima
- Hordeum vulgare
- Brachypodium distachyon
- Zea mays
- Sorghum bicolor
- Setaria italica
- Musa acuminata
- Selaginella moellendorffii
- Physcomitrella patens
- Ostreococcus tauri
- Ostreococcus lucimarinus CCE9901
- Chlamydomonas reinhardtii
- Cyanidioschyzon merolae
- Encephalitozoon hellem ATCC 50504
- Encephalitozoon intestinalis ATCC 50506
- Encephalitozoon cuniculi GB M1
- Puccinia graminis
- Puccinia triticina
- Ustilago maydis
- Malassezia globosa CBS 7966
- Cryptococcus gattii WM276
- Cryptococcus neoformans var. neoformans JEC21
- Cryptococcus neoformans var. neoformans B 3501A
- Phanerochaete chrysosporium
- Schizophyllum commune H4 B
- Coprinopsis cinerea okayama7\_130
- Laccaria bicolor S238N H82
- Schizosaccharomyces japonicus yFS275
- Schizosaccharomyces pombe
- Clavospora lusitaniae ATCC 42720
- Yarrowia lipolytica
- Candida tropicalis MYA 3404
- Candida dubliniensis CD36
- Lodderomyces elongisporus NRRL YB 4239
- Scheffersomyces stipitis CBS 6054
- Meyeromyza guilliermondii ATCC 6260
- Pichia guilliermondii
- Lachancea thermotolerans
- Kluyveromyces fragilis NRRL Y 1140
- Saccharomyces cerevisiae
- Zygosaccharomyces rouxii
- Komagataella pastoris GS115
- Vanderwaltozyma polyspora DSM 70294
- Torulopsis delbrueckii
- Candida glabrata CBS 138
- Tetrapisispora phaffii CBS 4417
- Naumovozyma dairenensis CBS 421
- Naumovozyma castellii CBS 4309
- Eremothecium cymbalariae DBVPG\_7215
- Eremothecium gossypii
- Tuber melanosporum
- Zymoseptoria tritici
- Phaeosphaeria nodorum
- Leptosphaeria maculans
- Pyrenophora tritici repens Pt 1C BFP
- Pyrenophora teres f. teres 0 1
- Botryotinia fuckeliana
- Sclerotinia sclerotiorum
- Verticillium albo atrum VaMs.102
- Fusarium oxysporum
- Hypocrea virens
- Hypocrea jecorina
- Nectria haematococca
- Gibberella moniliformis
- Gibberella zeae PH 1
- Gibberella zeae
- Gaeumannomyces graminis
- Magnaporthe grisea
- Magnaporthe poae
- Magnaporthe oryzae
- Podospora anserina S mat
- Neurospora crassa
- Sordaria macrospora k hell
- Myceliophthora thermophila ATCC 42464
- Chaetomium globosum CBS 148.51
- Thielavia terrestris NRRL 8126
- Uncinocarpus reesii 1704
- Ajellomyces capsulatus Nam1
- Ajellomyces dermatitidis SLH14081
- Paracoccidioides sp. lutzi Fb01
- Coccidioides posadasii C735 delta SOWgp
- Coccidioides immitis RS
- Trichophyton rubrum CBS 118892
- Trichophyton verrucosum HKI 0517
- Arthroderma benhamiae CBS 112371
- Arthroderma gypseum CBS 118893
- Arthroderma otae CBS 113480
- Talaromyces stipitatus ATCC 10500
- Neosartorya fischeri
- Emericella nidulans
- Penicillium chrysogenum Wisconsin 54 1255
- Penicillium marneffei ATCC 18224
- Aspergillus clavatus
- Aspergillus flavus
- Aspergillus oryzae
- Aspergillus niger
- Aspergillus fumigatus
- Aspergillus terreus
- Monosiga brevicollis MX1
- Amphimedon queenslandica
- Trichoplax adhaerens
- Nematostella vectensis
- Hydra magnipapillata
- Schistosoma mansoni
- Trichiella spiralis
- Pristionchus pacificus
- Caenorhabditis brenneri
- Caenorhabditis briggsae
- Caenorhabditis remanei
- Caenorhabditis japonica
- Caenorhabditis elegans
- Ixodes scapularis
- Daphnia pulex
- Pediculus humanus
- Acyrthosiphon pisum
- Tribolium castaneum
- Nasonia vitripennis
- Apis mellifera
- Atta cephalotes
- Bombyx mori
- Danaus plexippus
- Heliconius melpomene
- Culex quinquefasciatus
- Aedes aegypti
- Anopheles gambiae
- Anopheles darlingi
- Drosophila virilis
- Drosophila grimshawi
- Drosophila willistoni
- Drosophila pseudoobscura
- Drosophila ananassae
- Drosophila melanogaster
- Drosophila yakuba
- Strongylocentrotus purpuratus
- Branchiostoma floridae
- Ciona intestinalis
- Ciona savignyi
- Petromyzon marinus
- Danio rerio
- Gadus morhua
- Oreochromis niloticus
- Takifugu rubripes
- Tetraodon nigroviridis
- Gasterosteus aculeatus
- Xiphophorus maculatus
- Oryzias latipes
- Latimeria chalumnae
- Xenopus (Silurana) tropicalis
- Pelodiscus sinensis
- Anolis carolinensis
- Taeniopygia guttata
- Gallus gallus
- Meleagris gallopavo
- Ornithorhynchus anatinus
- Monodelphis domestica
- Sarcophilus harrisii
- Macropus eugenii
- Dasyurus novemcinctus
- Loxodonta africana
- Echinops telillari
- Procavia capensis
- Myotis lucifugus
- Pteropus vampyrus
- Sus scrofa
- Tursiops truncatus
- Bos taurus
- Equus caballus
- Felis catus
- Canis lupus familiaris
- Mustela putorius furo
- Alluropoda melanoleuca
- Cryptolestes cucullatus
- Cavia porcellus
- Ictidomys tridecemlineatus
- Dipodomys ordii
- Rattus norvegicus
- Mus musculus
- Tupaia belangeri
- Otolomus garretti
- Microcebus murinus
- Tarsius syrichta
- Callithrix jacchus
- Macaca mulatta
- Nomascus leucogenys
- Pongo abelii
- Gorilla gorilla
- Pan troglodytes
- Homo sapiens
- Perkinus marinus ATCC 50983
- Tetrahymena thermophila
- Paramecium tetraurelia strain d4 2
- Neospora caninum Liverpool
- Toxoplasma gondii
- Cryptosporidium muris RN66
- Cryptosporidium parvum Iowa II
- Cryptosporidium hominis TU502
- Theileria annulata strain Ankara
- Theileria parva strain Muguga
- Plasmodium falciparum
- Plasmodium knowlesi
- Plasmodium vivax
- Plasmodium chabaudi
- Plasmodium yoelii yoelii 17XNL
- Plasmodium berghei
- Phaeodactylum tricornutum
- Thalassiosira pseudonana
- Pythium ultimum
- Albugo falabachii
- Hyaloperonospora arabidopsidis
- Phytophthora ramorum
- Phytophthora infestans
- Phytophthora sojae
- Trypanosoma brucei
- Trypanosoma cruzi strain CL Brener
- Leishmania braziliensis MHOM BR 75 M2904
- Leishmania mexicana MHOM GT 2001 U1103
- Leishmania major
- Leishmania donovani
- Leishmania infantum JPCM5
- Entamoeba histolytica
- Entamoeba dispar SAW760
- Dictyostellium discoideum
- Dictyostellium purpureum
- Trichomonas vaginalis G3
- Trichomonas vaginalis
- Naegleria gruberi
- Giardia lamblia ATCC 50803

- OG presence
- OG absence
- ◆ Inferred root

Dscore = 0.987  
Pvalue = 2.91e-06  
AdjPvalue = 3.46e-04

- Arabis thaliana
- Arabidopsis lyrata
- Brassica rapa
- Glycine max
- Populus trichocarpa
- Vitis vinifera
- Solanum tuberosum
- Solanum lycopersicum
- Oryza sativa Indica Group
- Oryza sativa Japonica Group
- Oryza brachyantha
- Oryza glaberrima
- Hordeum vulgare
- Brachypodium distachyon
- Zea mays
- Sorghum bicolor
- Setaria italica
- Musa acuminata
- Salvinella moellendorffii
- Physcomitrella patens
- Ostreococcus tauri
- Ostreococcus lucimarinus CCE9901
- Chlamydomonas reinhardtii
- Cyanidioschyzon merolae
- Encephalitozoon hellem ATCC 50504
- Encephalitozoon intestinalis ATCC 50506
- Encephalitozoon cuniculi GB M1
- Puccinia graminis
- Puccinia triticina
- Ustilago maydis
- Melassezia globosa CBS 7966
- Cryptococcus gattii WM276
- Cryptococcus neoformans var. neoformans JEC21
- Cryptococcus neoformans var. neoformans B 3501A
- Phanerochaete chrysosporium
- Schizophyllum commune H4 B
- Coprinopsis cinerea okayama7\_130
- Laccaria bicolor S238N H82
- Schizosaccharomyces japonicus yFS275
- Schizosaccharomyces pombe
- Clavospora lusitanae ATCC 42720
- Yarrowia lipolytica
- Candida tropicalis MYA 3404
- Candida dubliniensis CD36
- Lodderomyces elongisporus NRRL YB 4239
- Scheffersomyces stipitis CBS 6054
- Meyerozyma guilliermondii ATCC 6260
- Pichia guilliermondii
- Lachancea thermotolerans
- Kluyveromyces lactis NRRL Y 1140
- Saccharomyces cerevisiae
- Zygosaccharomyces rouxii
- Komagataella pastoris GS115
- Vanderwaltozyma polyspora DSM 70294
- Torulopsis delbrueckii
- Candida glabrata CBS 138
- Tetrapisispora phaffii CBS 4417
- Naumovozyma dairenensis CBS 421
- Naumovozyma castellii CBS 4309
- Eremothecium cymbalariae DBVPG\_7215
- Eremothecium gossypii
- Tuber melanosporum
- Zymoseptoria tritici
- Phaeosphaeria nodorum
- Leptosphaeria maculans
- Pyrenophora tritici repens Pt 1C BFP
- Pyrenophora teres f. teres 0 1
- Botryotinia fuckeliana
- Sclerotinia sclerotiorum
- Verticillium albo atrum VaMs.102
- Fusarium oxysporum
- Hypocrea virens
- Hypocrea jecorina
- Nectria haematococca
- Gibberella moniliformis
- Gibberella zeae PH 1
- Gibberella zeae
- Gaeumannomyces graminis
- Magnaporthe grisea
- Magnaporthe poae
- Magnaporthe oryzae
- Podospira anserina S mat
- Neurospora crassa
- Sordaria macrospora k hell
- Myceliophthora thermophila ATCC 42464
- Chaetomium globosum CBS 148.51
- Thielavia terrestris NRRL 8126
- Uncinocarpus reesii 1704
- Ajellomyces capsulatus Nam1
- Ajellomyces dermatitidis SLH14081
- Paracoccidioides sp. lutzi Fb01
- Coccidioides posadasii C735 delta SOWgp
- Coccidioides immitis RS
- Trichophyton rubrum CBS 118892
- Trichophyton verrucosum HKI 0517
- Arthroderma benhamiae CBS 112371
- Arthroderma gypseum CBS 118893
- Arthroderma otae CBS 113480
- Talaromyces stipitatus ATCC 10500
- Neosartorya fischeri
- Emericella nidulans
- Penicillium chrysogenum Wisconsin 54 1255
- Penicillium marneffei ATCC 18224
- Aspergillus clavatus
- Aspergillus flavus
- Aspergillus oryzae
- Aspergillus niger
- Aspergillus fumigatus
- Aspergillus terreus
- Monosiga brevicollis MX1
- Amphimedon queenslandica
- Trichoplax adhaerens
- Nematostella vectensis
- Hydra magnipapillata
- Schistosoma mansoni
- Trichiella spiralis
- Pristionchus pacificus
- Caenorhabditis brenneri
- Caenorhabditis briggsae
- Caenorhabditis remanei
- Caenorhabditis japonica
- Caenorhabditis elegans
- Ixodes scapularis
- Daphnia pulex
- Pediculus humanus
- Acyrtosiphon pisum
- Tribolium castaneum
- Nasonia vitripennis
- Apis mellifera
- Atta cephalotes
- Bombyx mori
- Danaus plexippus
- Heliconius melpomene
- Culex quinquefasciatus
- Aedes aegypti
- Anopheles gambiae
- Anopheles darlingi
- Drosophila virilis
- Drosophila grimshawi
- Drosophila willistoni
- Drosophila pseudoobscura
- Drosophila ananassae
- Drosophila melanogaster
- Drosophila yakuba
- Strongylocentrotus purpuratus
- Branchiostoma floridae
- Ciona intestinalis
- Ciona savignyi
- Petromyzon marinus
- Danio rerio
- Gadus morhua
- Oreochromis niloticus
- Takifugu rubripes
- Tetraodon nigroviridis
- Gasterosteus aculeatus
- Xiphophorus maculatus
- Oryzias latipes
- Latimeria chalumnae
- Xenopus (Silurana) tropicalis
- Pelodiscus sinensis
- Anolis carolinensis
- Taeniopygia guttata
- Gallus gallus
- Meleagris gallopavo
- Ornithorhynchus anatinus
- Monodelphis domestica
- Sarcophilus harrisii
- Macropus eugenii
- Dasyurus novemcinctus
- Loxodonta africana
- Echinops telfairii
- Procavia capensis
- Myotis lucifugus
- Pteropus vampyrus
- Sus scrofa
- Tursiops truncatus
- Bos taurus
- Equus caballus
- Felis catus
- Canis lupus familiaris
- Mustela putorius furo
- Alluropoda melanoleuca
- Cryptolestes cuniculus
- Cavia porcellus
- Ictidomys tridecemlineatus
- Dipodomys ordii
- Rattus norvegicus
- Mus musculus
- Tupaia belangeri
- Otolomus garrettii
- Microcebus murinus
- Tarsius syrichta
- Callithrix jacchus
- Macaca mulatta
- Nomascus leucogenys
- Pongo abelii
- Gorilla gorilla
- Pan troglodytes
- Homo sapiens
- Perkinsus marinus ATCC 50983
- Tetrahymena thermophila
- Paramecium tetraurelia strain d4 2
- Neospora caninum Liverpool
- Toxoplasma gondii
- Cryptosporidium muris RN66
- Cryptosporidium parvum Iowa II
- Cryptosporidium hominis TU502
- Theileria annulata strain Ankara
- Theileria parva strain Muguga
- Plasmodium falciparum
- Plasmodium knowlesi
- Plasmodium vivax
- Plasmodium chabaudi
- Plasmodium yoelii yoelii 17XNL
- Plasmodium berghei
- Phaeodactylum tricornutum
- Thalassiosira pseudonana
- Pythium ultimum
- Albugo liliaceae
- Hyaloperonospora arabidopsidis
- Phytophthora ramorum
- Phytophthora infestans
- Phytophthora sojae
- Trypanosoma brucei
- Trypanosoma cruzi strain CL Brener
- Leishmania braziliensis MHOM BR 75 M2904
- Leishmania mexicana MHOM GT 2001 U1103
- Leishmania major
- Leishmania donovani
- Leishmania infantum JPCM5
- Entamoeba histolytica
- Entamoeba dispar SAW760
- Dicystostellum discoideum
- Dicystostellum purpureum
- Trichomonas vaginalis G3
- Trichomonas vaginalis
- Naegleria gruberi
- Giardia lamblia ATCC 50803

- OG presence
- OG absence
- Inferred root

Dscore = 0.905  
Pvalue = 2.19e-05  
AdjPvalue = 2.61e-03

- Arabis thaliana
- Arabidopsis lyrata
- Brassica rapa
- Glycine max
- Populus trichocarpa
- Vitis vinifera
- Solanum tuberosum
- Solanum lycopersicum
- Oryza sativa Indica Group
- Oryza sativa Japonica Group
- Oryza brachyantha
- Oryza glaberrima
- Hordeum vulgare
- Brachypodium distachyon
- Zea mays
- Sorghum bicolor
- Setaria italica
- Musa acuminata
- Selaginella moellendorffii
- Physcomitrella patens
- Ostreococcus tauri
- Ostreococcus lucimarinus CCE9901
- Chlamydomonas reinhardtii
- Cyanidioschyzon merolae
- Encephalitozoon hellem ATCC 50504
- Encephalitozoon intestinalis ATCC 50506
- Encephalitozoon cuniculi GB M1
- Puccinia graminis
- Puccinia triticina
- Ustilago maydis
- Malassezia globosa CBS 7966
- Cryptococcus gattii WM276
- Cryptococcus neoformans var. neoformans JEC21
- Cryptococcus neoformans var. neoformans B 3501A
- Phanerochaete chrysosporium
- Schizophyllum commune H4 B
- Coprinopsis cinerea okayama7\_130
- Laccaria bicolor S238N H82
- Schizosaccharomyces japonicus yFS275
- Schizosaccharomyces pombe
- Clavospora lusitanae ATCC 42720
- Yarrowia lipolytica
- Candida tropicalis MYA 3404
- Candida dubliniensis CD36
- Lodderomyces elongisporus NRRL YB 4239
- Scheffersomyces stipitis CBS 6054
- Meyerozyma guilliermondii ATCC 6260
- Pichia guilliermondii
- Lachancea thermotolerans
- Kluyveromyces fragilis NRRL Y 1140
- Saccharomyces cerevisiae
- Zygosaccharomyces rouxii
- Komagataella pastoris GS115
- Vanderwaltozyma polyspora DSM 70294
- Torulopsis delbrueckii
- Candida glabrata CBS 138
- Tetrapispora phaffii CBS 4417
- Naumovozyma dairenensis CBS 421
- Naumovozyma castellii CBS 4309
- Eremothecium cymbalariae DBVPG\_7215
- Eremothecium gossypii
- Tuber melanosporum
- Zymoseptoria tritici
- Phaeosphaeria nodorum
- Leptosphaeria maculans
- Pyrenophora tritici repens Pt 1C BFP
- Pyrenophora teres f. teres 0 1
- Botryotinia fuckeliana
- Sclerotinia sclerotiorum
- Verticillium albo atrum VaMs.102
- Fusarium oxysporum
- Hypocrea virens
- Hypocrea jecorina
- Nectria haematococca
- Gibberella moniliformis
- Gibberella zeae PH 1
- Gibberella zeae
- Gaeumannomyces graminis
- Magnaporthe grisea
- Magnaporthe poae
- Magnaporthe oryzae
- Podospira anserina S mat
- Neurospora crassa
- Sordaria macrospora k hell
- Myceliophthora thermophila ATCC 42464
- Chaetomium globosum CBS 148.51
- Thielavia terrestris NRRL 8126
- Uncinocarpus reesii 1704
- Ajellomyces capsulatus Nam1
- Ajellomyces dermatitidis SLH14081
- Paracoccidioides sp. lutzi Fb01
- Coccidioides posadasii C735 delta SOWgp
- Coccidioides immitis RS
- Trichophyton rubrum CBS 118892
- Trichophyton verrucosum HKI 0517
- Arthroderma benhamiae CBS 112371
- Arthroderma gypseum CBS 118893
- Arthroderma otae CBS 113480
- Talaromyces stipitatus ATCC 10500
- Neosartorya fischeri
- Emericella nidulans
- Penicillium chrysogenum Wisconsin 54 1255
- Penicillium marneffei ATCC 18224
- Aspergillus clavatus
- Aspergillus flavus
- Aspergillus oryzae
- Aspergillus niger
- Aspergillus fumigatus
- Aspergillus terreus
- Monosiga brevicollis MX1
- Amphimedon queenslandica
- Trichoplax adhaerens
- Nematostella vectensis
- Hydra magnipapillata
- Schistosoma mansoni
- Trichiella spiralis
- Pristionchus pacificus
- Caenorhabditis brenneri
- Caenorhabditis briggsae
- Caenorhabditis remanei
- Caenorhabditis japonica
- Caenorhabditis elegans
- Ixodes scapularis
- Daphnia pulex
- Pediculus humanus
- Acyrtosiphon pisum
- Tribolium castaneum
- Nasonia vitripennis
- Apis mellifera
- Atta cephalotes
- Bombyx mori
- Danaus plexippus
- Heliconius melpomene
- Culex quinquefasciatus
- Aedes aegypti
- Anopheles gambiae
- Anopheles darlingi
- Drosophila virilis
- Drosophila grimshawi
- Drosophila willistoni
- Drosophila pseudoobscura
- Drosophila ananassae
- Drosophila melanogaster
- Drosophila yakuba
- Strongylocentrotus purpuratus
- Branchiostoma floridae
- Ciona intestinalis
- Ciona savignyi
- Petromyzon marinus
- Danio rerio
- Gadus morhua
- Oreochromis niloticus
- Takifugu rubripes
- Tetraodon nigroviridis
- Gasterosteus aculeatus
- Xiphophorus maculatus
- Oryzias latipes
- Latimeria chalumnae
- Xenopus (Silurana) tropicalis
- Pelodiscus sinensis
- Anolis carolinensis
- Taeniopygia guttata
- Gallus gallus
- Meleagris gallopavo
- Ornithorhynchus anatinus
- Monodelphis domestica
- Sarcophilus harrisii
- Macropus eugenii
- Dasyurus novemcinctus
- Loxodonta africana
- Echinops telillari
- Procavia capensis
- Myotis lucifugus
- Pteropus vampyrus
- Sus scrofa
- Tursiops truncatus
- Bos taurus
- Equus caballus
- Felis catus
- Canis lupus familiaris
- Mustela putorius furo
- Alluropoda melanoleuca
- Cryptolestes cuniculus
- Cavia porcellus
- Ictidomys tridecemlineatus
- Dipodomys ordii
- Rattus norvegicus
- Mus musculus
- Tupaia belangeri
- Otolemur garrettii
- Microcebus murinus
- Tarsius syrichta
- Callithrix jacchus
- Macaca mulatta
- Nomascus leucogenys
- Pongo abelii
- Gorilla gorilla
- Pan troglodytes
- Homo sapiens
- Perkinsus marinus ATCC 50983
- Tetrahymena thermophila
- Paramecium tetraurelia strain d4 2
- Neospora caninum Liverpool
- Toxoplasma gondii
- Cryptosporidium muris RN66
- Cryptosporidium parvum Iowa II
- Cryptosporidium hominis TU502
- Theileria annulata strain Ankara
- Theileria parva strain Muguga
- Plasmodium falciparum
- Plasmodium knowlesi
- Plasmodium vivax
- Plasmodium chabaudi
- Plasmodium yoelii yoelii 17XNL
- Plasmodium berghei
- Phaeodactylum tricornutum
- Thalassiosira pseudonana
- Pythium ultimum
- Albugo liliaceae
- Hyaloperonospora arabidopsidis
- Phytophthora ramorum
- Phytophthora infestans
- Phytophthora sojae
- Trypanosoma brucei
- Trypanosoma cruzi strain CL Brener
- Leishmania braziliensis MHOM BR 75 M2904
- Leishmania mexicana MHOM GT 2001 U1103
- Leishmania major
- Leishmania donovani
- Leishmania infantum JPCM5
- Entamoeba histolytica
- Entamoeba dispar SAW760
- Dicystostellum discoideum
- Dicystostellum purpureum
- Trichomonas vaginalis G3
- Trichomonas vaginalis
- Naegleria gruberi
- Giardia lamblia ATCC 50803

- OG presence
- OG absence
- Inferred root

Dscore = 1  
Pvalue = 8.84e-06  
AdjPvalue = 1.05e-03

# NOG19390

- Arabis thaliana
- Arabidopsis lyrata
- Brassica rapa
- Glycine max
- Populus trichocarpa
- Vitis vinifera
- Solanum tuberosum
- Solanum lycopersicum
- Oryza sativa Indica Group
- Oryza sativa Japonica Group
- Oryza brachyantha
- Oryza glaberrima
- Hordeum vulgare
- Brachypodium distachyon
- Zea mays
- Sorghum bicolor
- Setaria italica
- Musa acuminata
- Selaginella moellendorffii
- Physcomitrella patens
- Ostreococcus tauri
- Ostreococcus lucimarinus CCE9901
- Chlamydomonas reinhardtii
- Cyanidioschyzon merolae
- Encephalitozoon hellem ATCC 50504
- Encephalitozoon intestinalis ATCC 50506
- Encephalitozoon cuniculi GB M1
- Puccinia graminis
- Puccinia triticina
- Ustilago maydis
- Melassezia globosa CBS 7966
- Cryptococcus gattii WM276
- Cryptococcus neoformans var. neoformans JEC21
- Cryptococcus neoformans var. neoformans B 3501A
- Phanerochaete chrysosporium
- Schizophyllum commune H4 B
- Coprinopsis cinerea okayama7\_130
- Laccaria bicolor S238N H82
- Schizosaccharomyces japonicus yFS275
- Schizosaccharomyces pombe
- Clavospora lusitanae ATCC 42720
- Yarrowia lipolytica
- Candida tropicalis MYA 3404
- Candida dubliniensis CD36
- Lodderomyces elongisporus NRRL YB 4239
- Scheffersomyces stipitis CBS 6054
- Meyerozyma guilliermondii ATCC 6260
- Pichia guilliermondii
- Lachancea thermotolerans
- Kluyveromyces fragilis NRRL Y 1140
- Saccharomyces cerevisiae
- Zygosaccharomyces rouxii
- Komagataella pastoris GS115
- Vanderwaltozyma polyspora DSM 70294
- Torulopsis delbrueckii
- Candida glabrata CBS 138
- Tetrapispora phaffii CBS 4417
- Naumovozyma dairensis CBS 421
- Naumovozyma castellii CBS 4309
- Eremothecium cymbalariae DBVPG\_7215
- Eremothecium gossypii
- Tuber melanosporum
- Zymoseptoria tritici
- Phaeosphaeria nodorum
- Leptosphaeria maculans
- Pyrenophora tritici repens Pt 1C BFP
- Pyrenophora teres f. teres 0 1
- Botryotinia fuckeliana
- Sclerotinia sclerotiorum
- Verticillium albo atrum VaMs.102
- Fusarium oxysporum
- Hypocrea virens
- Hypocrea jecorina
- Nectria haematococca
- Gibberella moniliformis
- Gibberella zeae PH 1
- Gibberella zeae
- Gaeumannomyces graminis
- Magnaporthe grisea
- Magnaporthe poae
- Magnaporthe oryzae
- Podospira anserina S mat
- Neurospora crassa
- Sordaria macrospora k hell
- Myceliophthora thermophila ATCC 42464
- Chaetomium globosum CBS 148.51
- Thielavia terrestris NRRL 8126
- Uncinocarpus reesii 1704
- Ajellomyces capsulatus Nam1
- Ajellomyces dermatitidis SLH14081
- Paracoccidioides sp. lutzi Pb01
- Coccidioides posadasii C735 delta SOWgp
- Coccidioides immitis RS
- Trichophyton rubrum CBS 118892
- Trichophyton verrucosum HKI 0517
- Arthroderma benhamiae CBS 112371
- Arthroderma gypseum CBS 118893
- Arthroderma otae CBS 113480
- Talaromyces stipitatus ATCC 10500
- Neosartorya fischeri
- Emericella nidulans
- Penicillium chrysogenum Wisconsin 54 1255
- Penicillium marneffei ATCC 18224
- Aspergillus clavatus
- Aspergillus flavus
- Aspergillus oryzae
- Aspergillus niger
- Aspergillus fumigatus
- Aspergillus terreus
- Monosiga brevicollis MX1
- Amphimedon queenslandica
- Trichoplax adhaerens
- Nematostella vectensis
- Hydra magnipapillata
- Schistosoma mansoni
- Trichiella spiralis
- Pristionchus pacificus
- Caenorhabditis breneri
- Caenorhabditis briggsae
- Caenorhabditis remanei
- Caenorhabditis japonica
- Caenorhabditis elegans
- Ixodes scapularis
- Daphnia pulex
- Pediculus humanus
- Acyrtosiphon pisum
- Tribolium castaneum
- Nasonia vitripennis
- Apis mellifera
- Atta cephalotes
- Bombyx mori
- Danaus plexippus
- Heliconius melpomene
- Culex quinquefasciatus
- Aedes aegypti
- Anopheles gambiae
- Anopheles darlingi
- Drosophila virilis
- Drosophila grimshawi
- Drosophila willistoni
- Drosophila pseudoobscura
- Drosophila ananassae
- Drosophila melanogaster
- Drosophila yakuba
- Strongylocentrotus purpuratus
- Branchiostoma floridae
- Ciona intestinalis
- Ciona savignyi
- Petromyzon marinus
- Danio rerio
- Gadus morhua
- Oreochromis niloticus
- Takifugu rubripes
- Tetraodon nigroviridis
- Gasterosteus aculeatus
- Xiphophorus maculatus
- Oryzias latipes
- Latimeria chalumnae
- Xenopus (Silurana) tropicalis
- Pelodiscus sinensis
- Anolis carolinensis
- Taeniopygia guttata
- Gallus gallus
- Meleagris gallopavo
- Ornithorhynchus anatinus
- Monodelphis domestica
- Sarcophilus harrisii
- Macropus eugenii
- Dasyurus novemcinctus
- Loxodonta africana
- Echinops telfairii
- Procavia capensis
- Myotis lucifugus
- Pteropus vampyrus
- Sus scrofa
- Tursiops truncatus
- Bos taurus
- Equus caballus
- Felis catus
- Canis lupus familiaris
- Mustela putorius furo
- Alluropoda melanoleuca
- Cryptolestes cuniculus
- Cavia porcellus
- Ictidomys tridecemlineatus
- Dipodomys ordii
- Rattus norvegicus
- Mus musculus
- Tupaia belangeri
- Otolomus garretti
- Microcebus murinus
- Tarsius syrichta
- Callithrix jacchus
- Macaca mulatta
- Nomascus leucogenys
- Pongo abelii
- Gorilla gorilla
- Pan troglodytes
- Homo sapiens
- Perkinsus marinus ATCC 50983
- Tetrahymena thermophila
- Paramecium tetraurelia strain d4 2
- Neospora caninum Liverpool
- Toxoplasma gondii
- Cryptosporidium muris RN66
- Cryptosporidium parvum Iowa II
- Cryptosporidium hominis TU502
- Theileria annulata strain Ankara
- Theileria parva strain Muguga
- Plasmodium falciparum
- Plasmodium knowlesi
- Plasmodium vivax
- Plasmodium chabaudi
- Plasmodium yoelii yoelii 17XNL
- Plasmodium berghei
- Phaeodactylum tricornutum
- Thalassiosira pseudonana
- Pythium ultimum
- Albugo liliaceae
- Hyaloperonospora arabidopsidis
- Phytophthora ramorum
- Phytophthora infestans
- Phytophthora sojae
- Trypanosoma brucei
- Trypanosoma cruzi strain CL Brener
- Leishmania braziliensis MHOM BR 75 M2904
- Leishmania mexicana MHOM GT 2001 U1103
- Leishmania major
- Leishmania donovani
- Leishmania infantum JPCM5
- Entamoeba histolytica
- Entamoeba dispar SAW760
- Dicystostellum discoideum
- Dicystostellum purpureum
- Trichomonas vaginalis G3
- Trichomonas vaginalis
- Naegleria gruberi
- Giardia lamblia ATCC 50803

- OG presence
- OG absence
- Inferred root

Dscore = 0.877

Pvalue = 7.14e-05

AdjPvalue = 8.49e-03

- Arabidopsis thaliana
- Arabidopsis lyrata
- Brassica rapa
- Glycine max
- Populus trichocarpa
- Vitis vinifera
- Solanum tuberosum
- Solanum lycopersicum
- Oryza sativa Indica Group
- Oryza sativa Japonica Group
- Oryza brachyantha
- Oryza glaberrima
- Hordeum vulgare
- Brachypodium distachyon
- Zea mays
- Sorghum bicolor
- Setaria italica
- Musa acuminata
- Selaginella moellendorffii
- Physcomitrella patens
- Ostreococcus tauri
- Ostreococcus lucimarinus CCE9901
- Chlamydomonas reinhardtii
- Cyanidioschyzon merolae
- Encephalitozoon hellem ATCC 50504
- Encephalitozoon intestinalis ATCC 50506
- Encephalitozoon cuniculi GB M1
- Puccinia graminis
- Puccinia triticina
- Ustilago maydis
- Malassezia globosa CBS 7966
- Cryptococcus gattii WM276
- Cryptococcus neoformans var. neoformans JEC21
- Cryptococcus neoformans var. neoformans B 3501A
- Phanerochaete chrysosporium
- Schizophyllum commune H4 B
- Coprinopsis cinerea okayama7\_130
- Laccaria bicolor S238N H82
- Schizosaccharomyces japonicus yFS275
- Schizosaccharomyces pombe
- Clavospora lusitanae ATCC 42720
- Yarrowia lipolytica
- Candida tropicalis MYA 3404
- Candida dubliniensis CD36
- Lodderomyces elongisporus NRRL YB 4239
- Scheffersomyces stipitis CBS 6054
- Meyeromyces guilliermondii ATCC 6260
- Pichia guilliermondii
- Lachancea thermotolerans
- Kluyveromyces fragilis NRRL Y 1140
- Saccharomyces cerevisiae
- Zygosaccharomyces rouxii
- Komagataella pastoris GS115
- Vanderwaltozyma polyspora DSM 70294
- Torulopsis delbrueckii
- Candida glabrata CBS 138
- Tetrapispora phaffii CBS 4417
- Naumovozyma dairensis CBS 421
- Naumovozyma castellii CBS 4309
- Eremothecium cymbalariae DBVPG\_7215
- Eremothecium gossypii
- Tuber melanosporum
- Zymoseptoria tritici
- Phaeosphaeria nodorum
- Leptosphaeria maculans
- Pyrenophora tritici repens Pt 1C BFP
- Pyrenophora teres f. teres 0 1
- Botryotinia fuckeliana
- Sclerotinia sclerotiorum
- Verticillium albo atrum VaMs.102
- Fusarium oxysporum
- Hypocrea virens
- Hypocrea jecorina
- Nectria haematococca
- Gibberella moniliformis
- Gibberella zeae PH 1
- Gibberella zeae
- Gaeumannomyces graminis
- Magnaporthe grisea
- Magnaporthe poae
- Magnaporthe oryzae
- Podospora anserina S mat
- Neurospora crassa
- Sordaria macrospora k hell
- Myceliophthora thermophila ATCC 42464
- Chaetomium globosum CBS 148.51
- Thielavia terrestris NRRL 8126
- Uncinocarpus reesii 1704
- Ajellomyces capsulatus Nam1
- Ajellomyces dermatitidis SLH14081
- Paracoccidioides sp. lutzi Fb01
- Coccidioides posadasii C735 delta SOWgp
- Coccidioides immitis RS
- Trichophyton rubrum CBS 118892
- Trichophyton verrucosum HKI 0517
- Arthroderma benhamiae CBS 112371
- Arthroderma gypseum CBS 118893
- Arthroderma otae CBS 113480
- Talaromyces stipitatus ATCC 10500
- Neosartorya fischeri
- Emericella nidulans
- Penicillium chrysogenum Wisconsin 54 1255
- Penicillium marneffei ATCC 18224
- Aspergillus clavatus
- Aspergillus flavus
- Aspergillus oryzae
- Aspergillus niger
- Aspergillus fumigatus
- Aspergillus terreus
- Monosiga brevicollis MX1
- Amphimedon queenslandica
- Trichoplax adhaerens
- Nematostella vectensis
- Hydra magnipapillata
- Schistosoma mansoni
- Trichiella spiralis
- Pristionchus pacificus
- Caenorhabditis breneri
- Caenorhabditis briggsae
- Caenorhabditis remanei
- Caenorhabditis japonica
- Caenorhabditis elegans
- Drosophila melanogaster
- Drosophila yakuba
- Strongylocentrotus purpuratus
- Branchiostoma floridae
- Ciona intestinalis
- Ciona savignyi
- Petromyzon marinus
- Danio rerio
- Gadus morhua
- Dreochromis niloticus
- Takifugu rubripes
- Tetraodon nigroviridis
- Gasterosteus aculeatus
- Xiphophorus maculatus
- Dryzius latipes
- Latimeria chalumnae
- Xenopus (Silurana) tropicalis
- Pelodiscus sinensis
- Anolis carolinensis
- Taeniopygia guttata
- Gallus gallus
- Meleagris gallopavo
- Ornithorhynchus anatinus
- Monodelphis domestica
- Sarcophilus harrisii
- Macropus eugenii
- Dasyurus novemcinctus
- Loxodonta africana
- Echinops telfairii
- Procavia capensis
- Myotis lucifugus
- Pteropus vampyrus
- Sus scrofa
- Turdus truncatus
- Bos taurus
- Equus caballus
- Felis catus
- Canis lupus familiaris
- Mustela putorius furo
- Alluropoda melanoleuca
- Cryptolepis cuniculus
- Cavia porcellus
- Ictidomys tridecemlineatus
- Dipodomys ordii
- Rattus norvegicus
- Mus musculus
- Tupaia belangeri
- Otolomus garrettii
- Microcebus murinus
- Tarsius syrichta
- Callithrix jacchus
- Macaca mulatta
- Nomascus leucogenys
- Pongo abelii
- Gorilla gorilla
- Pan troglodytes
- Homo sapiens
- Perkinus marinus ATCC 50983
- Tetrahymena thermophila
- Paramecium tetraurelia strain d4 2
- Neospora caninum Liverpool
- Toxoplasma gondii
- Cryptosporidium muris RN66
- Cryptosporidium parvum Iowa II
- Cryptosporidium hominis TU502
- Theileria annulata strain Ankara
- Theileria parva strain Muguga
- Plasmodium falciparum
- Plasmodium knowlesi
- Plasmodium vivax
- Plasmodium chabaudi
- Plasmodium yoelii yoelii 17XNL
- Plasmodium berghei
- Phaeadactylum tricorutum
- Thalassiosira pseudonana
- Pythium ultimum
- Albugo laluchii
- Hyaloperonospora arabidopsidis
- Phytophthora ramorum
- Phytophthora infestans
- Phytophthora sojae
- Trypanosoma brucei
- Trypanosoma cruzi strain CL Brener
- Leishmania braziliensis MHOM BR 75 M2904
- Leishmania mexicana MHOM GT 2001 U1103
- Leishmania major
- Leishmania donovani
- Leishmania infantum JPCM5
- Entamoeba histolytica
- Entamoeba dispar SAW760
- Dictyostellium discoideum
- Dictyostellium purpureum
- Trichomonas vaginalis G3
- Trichomonas vaginalis
- Naegleria gruberi
- Giardia lamblia ATCC 50803

- OG presence
- OG absence
- ◆ Inferred root

Dscore = 0.884

Pvalue = 7.91e-05

AdjPvalue = 9.42e-03

- Arabis thaliana
- Arabis lyrata
- Brassica rapa
- Glycine max
- Populus trichocarpa
- Vitis vinifera
- Solanum tuberosum
- Solanum lycopersicum
- Oryza sativa Indica Group
- Oryza sativa Japonica Group
- Oryza brachyantha
- Oryza glaberrima
- Hordeum vulgare
- Brachypodium distachyon
- Zea mays
- Sorghum bicolor
- Setaria italica
- Musa acuminata
- Selaginella moellendorffii
- Physcomitrella patens
- Ostreococcus tauri
- Ostreococcus lucimarinus CCE9901
- Chlamydomonas reinhardtii
- Cyanidioschyzon merolae
- Encephalitozoon hellem ATCC 50504
- Encephalitozoon intestinalis ATCC 50506
- Encephalitozoon cuniculi GB M1
- Puccinia graminis
- Puccinia triticina
- Ustilago maydis
- Melassezia globosa CBS 7966
- Cryptococcus gattii WM276
- Cryptococcus neoformans var. neoformans JEC21
- Cryptococcus neoformans var. neoformans B 3501A
- Phanerochaete chrysosporium
- Schizophyllum commune H4 B
- Coprinopsis cinerea okayama7\_130
- Laccaria bicolor S238N H82
- Schizosaccharomyces japonicus yFS275
- Schizosaccharomyces pombe
- Clavospora lusitanae ATCC 42720
- Yarrowia lipolytica
- Candida tropicalis MYA 3404
- Candida dubliniensis CD36
- Lodderomyces elongisporus NRRL YB 4239
- Scheffersomyces stipitis CBS 6054
- Meyerozyma guilliermondii ATCC 6260
- Pichia guilliermondii
- Lachancea thermotolerans
- Kluyveromyces fragilis NRRL Y 1140
- Saccharomyces cerevisiae
- Zygosaccharomyces rouxii
- Komagataella pastoris GS115
- Vanderwaltozyma polyspora DSM 70294
- Torulopsis delbrueckii
- Candida glabrata CBS 138
- Tetrapispora phaffii CBS 4417
- Naumovozyma dairensis CBS 421
- Naumovozyma castellii CBS 4309
- Eremothecium cymbalariae DBVPG\_7215
- Eremothecium gossypii
- Tuber melanosporum
- Zymoseptoria tritici
- Phaeosphaeria nodorum
- Leptosphaeria maculans
- Pyrenophora tritici repens Pt 1C BFP
- Pyrenophora teres f. teres 0 1
- Botryotinia fuckeliana
- Sclerotinia sclerotiorum
- Verticillium albo atrum VaMs.102
- Fusarium oxysporum
- Hypocrea virens
- Hypocrea jecorina
- Nectria haematococca
- Gibberella moniliformis
- Gibberella zeae PH 1
- Gibberella zeae
- Gaeumannomyces graminis
- Magnaporthe grisea
- Magnaporthe poae
- Magnaporthe oryzae
- Podospira anserina S mat
- Neurospora crassa
- Sordaria macrospora k hell
- Myceliophthora thermophila ATCC 42464
- Chaetomium globosum CBS 148.51
- Thielavia terrestris NRRL 8126
- Uncinocarpus reesii 1704
- Ajellomyces capsulatus Nam1
- Ajellomyces dermatitidis SLH14081
- Paracoccidioides sp. lutzi Fb01
- Coccidioides posadasii C735 delta SOWgp
- Coccidioides immitis RS
- Trichophyton rubrum CBS 118892
- Trichophyton verrucosum HKI 0517
- Arthroderma benhamiae CBS 112371
- Arthroderma gypseum CBS 118893
- Arthroderma otae CBS 113480
- Talaromyces stipitatus ATCC 10500
- Neosartorya fischeri
- Emericella nidulans
- Penicillium chrysogenum Wisconsin 54 1255
- Penicillium marneffei ATCC 18224
- Aspergillus clavatus
- Aspergillus flavus
- Aspergillus oryzae
- Aspergillus niger
- Aspergillus fumigatus
- Aspergillus terreus
- Monosiga brevicollis MX1
- Amphimedon queenslandica
- Trichoplax adhaerens
- Nematostella vectensis
- Hydra magnipapillata
- Schistosoma mansoni
- Trichinella spiralis
- Pristionchus pacificus
- Caenorhabditis brenneri
- Caenorhabditis briggsae
- Caenorhabditis remanei
- Caenorhabditis japonica
- Caenorhabditis elegans
- Ixodes scapularis
- Daphnia pulex
- Pediculus humanus
- Acyrtosiphon pisum
- Tribolium castaneum
- Nasonia vitripennis
- Apis mellifera
- Atta cephalotes
- Bombyx mori
- Danaus plexippus
- Heliconius melpomene
- Culex quinquefasciatus
- Aedes aegypti
- Anopheles gambiae
- Anopheles darlingi
- Drosophila virilis
- Drosophila grimshawi
- Drosophila willistoni
- Drosophila pseudoobscura
- Drosophila ananassae
- Drosophila melanogaster
- Drosophila yakuba
- Strongylocentrotus purpuratus
- Branchiostoma floridae
- Ciona intestinalis
- Ciona savignyi
- Petromyzon marinus
- Danio rerio
- Gadus morhua
- Oreochromis niloticus
- Takifugu rubripes
- Tetraodon nigroviridis
- Gasterosteus aculeatus
- Xiphophorus maculatus
- Oryzias latipes
- Latimeria chalumnae
- Xenopus (Silurana) tropicalis
- Pelodiscus sinensis
- Anolis carolinensis
- Taeniopygia guttata
- Gallus gallus
- Meleagris gallopavo
- Ornithorhynchus anatinus
- Monodelphis domestica
- Sarcophilus harrisii
- Macropus eugenii
- Dasyurus novemcinctus
- Loxodonta africana
- Echinops telillari
- Procavia capensis
- Myotis lucifugus
- Pteropus vampyrus
- Sus scrofa
- Tursiops truncatus
- Bos taurus
- Equus caballus
- Felis catus
- Canis lupus familiaris
- Mustela putorius furo
- Alluropoda melanoleuca
- Cryptolestes cuniculus
- Cavia porcellus
- Ictidomys tridecemlineatus
- Dipodomys ordii
- Rattus norvegicus
- Mus musculus
- Tupaia belangeri
- Otolomus garretti
- Microcebus murinus
- Tarsius syrichta
- Callithrix jacchus
- Macaca mulatta
- Nomascus leucogenys
- Pongo abelii
- Gorilla gorilla
- Pan troglodytes
- Homo sapiens
- Perkinsus marinus ATCC 50983
- Tetrahymena thermophila
- Paramecium tetraurelia strain d4 2
- Neospora caninum Liverpool
- Toxoplasma gondii
- Cryptosporidium muris RN66
- Cryptosporidium parvum Iowa II
- Cryptosporidium hominis TU502
- Theileria annulata strain Ankara
- Theileria parva strain Muguga
- Plasmodium falciparum
- Plasmodium knowlesi
- Plasmodium vivax
- Plasmodium chabaudi
- Plasmodium yoelii yoelii 17XNL
- Plasmodium berghei
- Phaeodactylum tricornutum
- Thalassiosira pseudonana
- Pythium ultimum
- Albugo liliaceae
- Hyaloperonospora arabidopsidis
- Phytophthora ramorum
- Phytophthora infestans
- Phytophthora sojae
- Trypanosoma brucei
- Trypanosoma cruzi strain CL Brener
- Leishmania braziliensis MHOM BR 75 M2904
- Leishmania mexicana MHOM GT 2001 U1103
- Leishmania major
- Leishmania donovani
- Leishmania infantum JPCM5
- Entamoeba histolytica
- Entamoeba dispar SAW760
- Dicystostellium discoideum
- Dicystostellium purpureum
- Trichomonas vaginalis G3
- Trichomonas vaginalis
- Naegleria gruberi
- Giardia lamblia ATCC 50803

- OG presence
- OG absence
- Inferred root

Dscore = 1  
Pvalue = 5.23e-07  
AdjPvalue = 6.22e-05



- Arabis thaliana
- Arabis lyrata
- Brassica rapa
- Glycine max
- Populus trichocarpa
- Vitis vinifera
- Solanum tuberosum
- Solanum lycopersicum
- Oryza sativa Indica Group
- Oryza sativa Japonica Group
- Oryza brachyantha
- Oryza glaberrima
- Hordeum vulgare
- Brachypodium distachyon
- Zea mays
- Sorghum bicolor
- Setaria italica
- Musa acuminata
- Selaginella moellendorffii
- Physcomitrella patens
- Ostreococcus tauri
- Ostreococcus lucimarinus CCE9901
- Chlamydomonas reinhardtii
- Cyanidioschyzon merolae
- Encephalitozoon hellem ATCC 50504
- Encephalitozoon intestinalis ATCC 50506
- Encephalitozoon cuniculi GB M1
- Puccinia graminis
- Puccinia triticina
- Ustilago maydis
- Melassezia globosa CBS 7966
- Cryptococcus gattii WM276
- Cryptococcus neoformans var. neoformans JEC21
- Cryptococcus neoformans var. neoformans B 3501A
- Phanerochaete chrysosporium
- Schizophyllum commune H4 B
- Coprinopsis cinerea okayama7\_130
- Laccaria bicolor S238N H82
- Schizosaccharomyces japonicus yFS275
- Schizosaccharomyces pombe
- Clavospora lusitanae ATCC 42720
- Yarrowia lipolytica
- Candida tropicalis MYA 3404
- Candida dubliniensis CD36
- Lodderomyces elongisporus NRRL YB 4239
- Scheffersomyces stipitis CBS 6054
- Meyerozyma guilliermondii ATCC 6260
- Pichia guilliermondii
- Lachancea thermotolerans
- Kluyveromyces fragilis NRRL Y 1140
- Saccharomyces cerevisiae
- Zygosaccharomyces rouxii
- Komagataella pastoris GS115
- Vanderwaltozyma polyspora DSM 70294
- Torulopsis delbrueckii
- Candida glabrata CBS 138
- Tetrapispora phaffii CBS 4417
- Naumovozyma dairensis CBS 421
- Naumovozyma castellii CBS 4309
- Eremothecium cymbalariae DBVPG\_7215
- Eremothecium gossypii
- Tuber melanosporum
- Zymoseptoria tritici
- Phaeosphaeria nodorum
- Leptosphaeria maculans
- Pyrenophora tritici repens Pt 1C BFP
- Pyrenophora teres f. teres 0 1
- Botryotinia fuckeliana
- Sclerotinia sclerotiorum
- Verticillium albo atrum VaMs.102
- Fusarium oxysporum
- Hypocrea virens
- Hypocrea jecorina
- Nectria haematococca
- Gibberella moniliformis
- Gibberella zeae PH 1
- Gibberella zeae
- Gaeumannomyces graminis
- Magnaporthe grisea
- Magnaporthe poae
- Magnaporthe oryzae
- Podospira anserina S mat
- Neurospora crassa
- Sordaria macrospora k hell
- Myceliophthora thermophila ATCC 42464
- Chaetomium globosum CBS 148.51
- Thielavia terrestris NRRL 8126
- Uncinocarpus reesii 1704
- Ajellomyces capsulatus Nam1
- Ajellomyces dermatitidis SLH14081
- Paracoccidioides sp. lutzi Fb01
- Coccidioides posadasii C735 delta SOWgp
- Coccidioides immitis RS
- Trichophyton rubrum CBS 118892
- Trichophyton verrucosum HKI 0517
- Arthroderma benhamiae CBS 112371
- Arthroderma gypseum CBS 118893
- Arthroderma otae CBS 113480
- Talaromyces stipitatus ATCC 10500
- Neosartorya fischeri
- Emericella nidulans
- Penicillium chrysogenum Wisconsin 54 1255
- Penicillium marneffei ATCC 18224
- Aspergillus clavatus
- Aspergillus flavus
- Aspergillus oryzae
- Aspergillus niger
- Aspergillus fumigatus
- Aspergillus terreus
- Monosiga brevicollis MX1
- Amphimedon queenslandica
- Trichoplax adhaerens
- Nematostella vectensis
- Hydra magnipapillata
- Schistosoma mansoni
- Trichinella spiralis
- Pristionchus pacificus
- Caenorhabditis brenneri
- Caenorhabditis briggsae
- Caenorhabditis remanei
- Caenorhabditis japonica
- Caenorhabditis elegans
- Ixodes scapularis
- Daphnia pulex
- Pediculus humanus
- Acyrtosiphon pisum
- Tribolium castaneum
- Nasonia vitripennis
- Apis mellifera
- Atta cephalotes
- Bombyx mori
- Danaus plexippus
- Heliconius melpomene
- Culex quinquefasciatus
- Aedes aegypti
- Anopheles gambiae
- Anopheles darlingi
- Drosophila virilis
- Drosophila grimshawi
- Drosophila willistoni
- Drosophila pseudoobscura
- Drosophila ananassae
- Drosophila melanogaster
- Drosophila yakuba
- Strongylocentrotus purpuratus
- Branchiostoma floridae
- Ciona intestinalis
- Ciona savignyi
- Petromyzon marinus
- Danio rerio
- Gadus morhua
- Oreochromis niloticus
- Takifugu rubripes
- Tetraodon nigroviridis
- Gasterosteus aculeatus
- Xiphophorus maculatus
- Oryzias latipes
- Latimeria chalumnae
- Xenopus (Silurana) tropicalis
- Pelodiscus sinensis
- Anolis carolinensis
- Taeniopygia guttata
- Gallus gallus
- Meleagris gallopavo
- Ornithorhynchus anatinus
- Monodelphis domestica
- Sarcophilus harrisii
- Macropus eugenii
- Dasyurus novemcinctus
- Loxodonta africana
- Echinops telillari
- Procavia capensis
- Myotis lucifugus
- Pteropus vampyrus
- Sus scrofa
- Tursiops truncatus
- Bos taurus
- Equus caballus
- Felis catus
- Canis lupus familiaris
- Mustela putorius furo
- Alluropoda melanoleuca
- Cryptolestes cuniculus
- Cavia porcellus
- Ictidomys tridecemlineatus
- Dipodomys ordii
- Rattus norvegicus
- Mus musculus
- Tupaia belangeri
- Otolomus garrettii
- Microcebus murinus
- Tarsius syrichta
- Callithrix jacchus
- Macaca mulatta
- Nomascus leucogenys
- Pongo abelii
- Gorilla gorilla
- Pan troglodytes
- Homo sapiens
- Perkinsus marinus ATCC 50983
- Tetrahymena thermophila
- Paramecium tetraurelia strain d4 2
- Neospora caninum Liverpool
- Toxoplasma gondii
- Cryptosporidium muris RN66
- Cryptosporidium parvum Iowa II
- Cryptosporidium hominis TU502
- Theileria annulata strain Ankara
- Theileria parva strain Muguga
- Plasmodium falciparum
- Plasmodium knowlesi
- Plasmodium vivax
- Plasmodium chabaudi
- Plasmodium yoelii yoelii 17XNL
- Plasmodium berghei
- Phaeodactylum tricornutum
- Thalassiosira pseudonana
- Pythium ultimum
- Albugo liliaceae
- Hyaloperonospora arabidopsidis
- Phytophthora ramorum
- Phytophthora infestans
- Phytophthora sojae
- Trypanosoma brucei
- Trypanosoma cruzi strain CL Brener
- Leishmania braziliensis MHOM BR 75 M2904
- Leishmania mexicana MHOM GT 2001 U1103
- Leishmania major
- Leishmania donovani
- Leishmania infantum JPCM5
- Entamoeba histolytica
- Entamoeba dispar SAW760
- Dicystostellum discoideum
- Dicystostellum purpureum
- Trichomonas vaginalis G3
- Trichomonas vaginalis
- Naegleria gruberi
- Giardia lamblia ATCC 50803

- OG presence
- OG absence
- Inferred root

Dscore = 1  
Pvalue = 2.56e-07  
AdjPvalue = 3.05e-05

- Arabis thaliana
- Arabis lyrata
- Brassica rapa
- Glycine max
- Populus trichocarpa
- Vitis vinifera
- Solanum tuberosum
- Solanum lycopersicum
- Oryza sativa Indica Group
- Oryza sativa Japonica Group
- Oryza brachyantha
- Oryza glaberrima
- Hordeum vulgare
- Brachypodium distachyon
- Zea mays
- Sorghum bicolor
- Setaria italica
- Musa acuminata
- Selaginella moellendorffii
- Physcomitrella patens
- Ostreococcus tauri
- Ostreococcus lucimarinus CCE9901
- Chlamydomonas reinhardtii
- Cyanidioschyzon merolae
- Encephalitozoon hellem ATCC 50504
- Encephalitozoon intestinalis ATCC 50506
- Encephalitozoon cuniculi GB M1
- Puccinia graminis
- Puccinia triticina
- Ustilago maydis
- Melassezia globosa CBS 7966
- Cryptococcus gattii WM276
- Cryptococcus neoformans var. neoformans JEC21
- Cryptococcus neoformans var. neoformans B 3501A
- Phanerochaete chrysosporium
- Schizophyllum commune H4 B
- Coprinopsis cinerea okayama7\_130
- Laccaria bicolor S238N H82
- Schizosaccharomyces japonicus yFS275
- Schizosaccharomyces pombe
- Clavospora lusitanae ATCC 42720
- Yarrowia lipolytica
- Candida tropicalis MYA 3404
- Candida dubliniensis CD36
- Lodderomyces elongisporus NRRL YB 4239
- Scheffersomyces stipitis CBS 6054
- Meyerozyma guilliermondii ATCC 6260
- Pichia guilliermondii
- Lachancea thermotolerans
- Kluyveromyces fragilis NRRL Y 1140
- Saccharomyces cerevisiae
- Zygosaccharomyces rouxii
- Komagataella pastoris GS115
- Vanderwaltozyma polyspora DSM 70294
- Torulopsis delbrueckii
- Candida glabrata CBS 138
- Tetrapispora phaffii CBS 4417
- Naumovozyma dairensis CBS 421
- Naumovozyma castellii CBS 4309
- Eremothecium cymbalariae DBVPG\_7215
- Eremothecium gossypii
- Tuber melanosporum
- Zymoseptoria tritici
- Phaeosphaeria nodorum
- Leptosphaeria maculans
- Pyrenophora tritici repens Pt 1C BFP
- Pyrenophora teres f. teres 0 1
- Botryotinia fuckeliana
- Sclerotinia sclerotiorum
- Verticillium albo atrum VaMs.102
- Fusarium oxysporum
- Hypocrea virens
- Hypocrea jecorina
- Nectria haematococca
- Gibberella moniliformis
- Gibberella zeae PH 1
- Gibberella zeae
- Gaeumannomyces graminis
- Magnaporthe grisea
- Magnaporthe poae
- Magnaporthe oryzae
- Podospira anserina S mat
- Neurospora crassa
- Sordaria macrospora k hell
- Myceliophthora thermophila ATCC 42464
- Chaetomium globosum CBS 148.51
- Thielavia terrestris NRRL 8126
- Uncinocarpus reesii 1704
- Ajellomyces capsulatus Nam1
- Ajellomyces dermatitidis SLH14081
- Paracoccidioides sp. lutzi Fb01
- Coccidioides posadasii C735 delta SOWgp
- Coccidioides immitis RS
- Trichophyton rubrum CBS 118892
- Trichophyton verrucosum HKI 0517
- Arthroderma benhamiae CBS 112371
- Arthroderma gypseum CBS 118893
- Arthroderma otae CBS 113480
- Talaromyces stipitatus ATCC 10500
- Neosartorya fischeri
- Emericella nidulans
- Penicillium chrysogenum Wisconsin 54 1255
- Penicillium marneffei ATCC 18224
- Aspergillus clavatus
- Aspergillus flavus
- Aspergillus oryzae
- Aspergillus niger
- Aspergillus fumigatus
- Aspergillus terreus
- Monosiga brevicollis MX1
- Amphimedon queenslandica
- Trichoplax adhaerens
- Nematostella vectensis
- Hydra magnipapillata
- Schistosoma mansoni
- Trichinella spiralis
- Pristionchus pacificus
- Caenorhabditis brenneri
- Caenorhabditis briggsae
- Caenorhabditis remanei
- Caenorhabditis japonica
- Caenorhabditis elegans
- Ixodes scapularis
- Daphnia pulex
- Pediculus humanus
- Acyrtosiphon pisum
- Tribolium castaneum
- Nasonia vitripennis
- Apis mellifera
- Atta cephalotes
- Bombyx mori
- Danaus plexippus
- Heliconius melpomene
- Culex quinquefasciatus
- Aedes aegypti
- Anopheles gambiae
- Anopheles darlingi
- Drosophila virilis
- Drosophila grimshawi
- Drosophila willistoni
- Drosophila pseudoobscura
- Drosophila ananassae
- Drosophila melanogaster
- Drosophila yakuba
- Strongylocentrotus purpuratus
- Branchiostoma floridae
- Ciona intestinalis
- Ciona savignyi
- Petromyzon marinus
- Danio rerio
- Gadus morhua
- Oreochromis niloticus
- Takifugu rubripes
- Tetraodon nigroviridis
- Gasterosteus aculeatus
- Xiphophorus maculatus
- Oryzias latipes
- Latimeria chalumnae
- Xenopus (Silurana) tropicalis
- Pelodiscus sinensis
- Anolis carolinensis
- Taeniopygia guttata
- Gallus gallus
- Meleagris gallopavo
- Ornithorhynchus anatinus
- Monodelphis domestica
- Sarcophilus harrisii
- Macropus eugenii
- Dasyurus novemcinctus
- Loxodonta africana
- Echinops telillari
- Procavia capensis
- Myotis lucifugus
- Pteropus vampyrus
- Sus scrofa
- Tursiops truncatus
- Bos taurus
- Equus caballus
- Felis catus
- Canis lupus familiaris
- Mustela putorius furo
- Alluropoda melanoleuca
- Cryptolestes cuniculus
- Cavia porcellus
- Ictidomys tridecemlineatus
- Dipodomys ordii
- Rattus norvegicus
- Mus musculus
- Tupaia belangeri
- Urolemur garnettii
- Microcebus murinus
- Tarsius syrichta
- Callithrix jacchus
- Macaca mulatta
- Nomascus leucogenys
- Pongo abelii
- Gorilla gorilla
- Pan troglodytes
- Homo sapiens
- Perkinsus marinus ATCC 50983
- Tetrahymena thermophila
- Paramecium tetraurelia strain d4 2
- Neospora caninum Liverpool
- Toxoplasma gondii
- Cryptosporidium muris RN66
- Cryptosporidium parvum Iowa II
- Cryptosporidium hominis TU502
- Theileria annulata strain Ankara
- Theileria parva strain Muguga
- Plasmodium falciparum
- Plasmodium knowlesi
- Plasmodium vivax
- Plasmodium chabaudi
- Plasmodium yoelii yoelii 17XNL
- Plasmodium berghei
- Phaeodactylum tricornutum
- Thalassiosira pseudonana
- Pythium ultimum
- Albugo laibachii
- Hyaloperonospora arabidopsidis
- Phytophthora ramorum
- Phytophthora infestans
- Phytophthora sojae
- Trypanosoma brucei
- Trypanosoma cruzi strain CL Brener
- Leishmania braziliensis MHOM BR 75 M2904
- Leishmania mexicana MHOM GT 2001 U1103
- Leishmania major
- Leishmania donovani
- Leishmania infantum JPCM5
- Entamoeba histolytica
- Entamoeba dispar SAW760
- Dicystostellum discoideum
- Dicystostellum purpureum
- Trichomonas vaginalis G3
- Trichomonas vaginalis
- Naegleria gruberi
- Giardia lamblia ATCC 50803

- OG presence
- OG absence
- Inferred root

Dscore = 1  
Pvalue = 1.25e-06  
AdjPvalue = 1.48e-04

- Arabis thaliana
- Arabis lyrata
- Brassica rapa
- Glycine max
- Populus trichocarpa
- Vitis vinifera
- Solanum tuberosum
- Solanum lycopersicum
- Oryza sativa Indica Group
- Oryza sativa Japonica Group
- Oryza brachyantha
- Oryza glaberrima
- Hordeum vulgare
- Brachypodium distachyon
- Zea mays
- Sorghum bicolor
- Setaria italica
- Musa acuminata
- Selaginella moellendorffii
- Physcomitrella patens
- Ostreococcus tauri
- Ostreococcus lucimarinus CCE9901
- Chlamydomonas reinhardtii
- Cyanidioschyzon merolae
- Encephalitozoon hellem ATCC 50504
- Encephalitozoon intestinalis ATCC 50506
- Encephalitozoon cuniculi GB M1
- Puccinia graminis
- Puccinia triticina
- Ustilago maydis
- Malassezia globosa CBS 7966
- Cryptococcus gattii WM276
- Cryptococcus neoformans var. neoformans JEC21
- Cryptococcus neoformans var. neoformans B 3501A
- Phanerochaete chrysosporium
- Schizophyllum commune H4 B
- Coprinopsis cinerea okayama7\_130
- Laccaria bicolor S238N H82
- Schizosaccharomyces japonicus yFS275
- Schizosaccharomyces pombe
- Clavospora lusitanae ATCC 42720
- Yarrowia lipolytica
- Candida tropicalis MYA 3404
- Candida dubliniensis CD36
- Lodderomyces elongisporus NRRL YB 4239
- Scheffersomyces stipitis CBS 6054
- Meyerozyma guilliermondii ATCC 6260
- Pichia guilliermondii
- Lachancea thermotolerans
- Kluyveromyces fragilis NRRL Y 1140
- Saccharomyces cerevisiae
- Zygosaccharomyces rouxii
- Komagataella pastoris GS115
- Vanderwaltozyma polyspora DSM 70294
- Torulopsis delbrueckii
- Candida glabrata CBS 138
- Tetrapispora phaffii CBS 4417
- Naumovozyma dairensis CBS 421
- Naumovozyma castellii CBS 4309
- Eremothecium cymbalariae DBVPG\_7215
- Eremothecium gossypii
- Tuber melanosporum
- Zymoseptoria tritici
- Phaeosphaeria nodorum
- Leptosphaeria maculans
- Pyrenophora tritici repens Pt 1C BFP
- Pyrenophora teres f. teres 0 1
- Botryotinia fuckeliana
- Sclerotinia sclerotiorum
- Verticillium albo atrum VaMs.102
- Fusarium oxysporum
- Hypocrea virens
- Hypocrea jecorina
- Nectria haematococca
- Gibberella moniliformis
- Gibberella zeae PH 1
- Gibberella zeae
- Gaeumannomyces graminis
- Magnaporthe grisea
- Magnaporthe poae
- Magnaporthe oryzae
- Podospira anserina S mat
- Neurospora crassa
- Sordaria macrospora k hell
- Myceliophthora thermophila ATCC 42464
- Chaetomium globosum CBS 148.51
- Thielavia terrestris NRRL 8126
- Uncinocarpus reesii 1704
- Ajellomyces capsulatus Nam1
- Ajellomyces dermatitidis SLH14081
- Paracoccidioides sp. lutzi Fb01
- Coccidioides posadasii C735 delta SOWgp
- Coccidioides immitis RS
- Trichophyton rubrum CBS 118892
- Trichophyton verrucosum HKI 0517
- Arthroderma benhamiae CBS 112371
- Arthroderma gypseum CBS 118893
- Arthroderma otae CBS 113480
- Talaromyces stipitatus ATCC 10500
- Neosartorya fischeri
- Emericella nidulans
- Penicillium chrysogenum Wisconsin 54 1255
- Penicillium marneffei ATCC 18224
- Aspergillus clavatus
- Aspergillus flavus
- Aspergillus oryzae
- Aspergillus niger
- Aspergillus fumigatus
- Aspergillus terreus
- Monosiga brevicollis MX1
- Amphimedon queenslandica
- Trichoplax adhaerens
- Nematostella vectensis
- Hydra magnipapillata
- Schistosoma mansoni
- Trichiella spiralis
- Pristionchus pacificus
- Caenorhabditis brenneri
- Caenorhabditis briggsae
- Caenorhabditis remanei
- Caenorhabditis japonica
- Caenorhabditis elegans
- Ixodes scapularis
- Daphnia pulex
- Pediculus humanus
- Acyrtosiphon pisum
- Tribolium castaneum
- Nasonia vitripennis
- Apis mellifera
- Atta cephalotes
- Bombyx mori
- Danaus plexippus
- Heliconius melpomene
- Culex quinquefasciatus
- Aedes aegypti
- Anopheles gambiae
- Anopheles darlingi
- Drosophila virilis
- Drosophila grimshawi
- Drosophila willistoni
- Drosophila pseudoobscura
- Drosophila ananassae
- Drosophila melanogaster
- Drosophila yakuba
- Strongylocentrotus purpuratus
- Branchiostoma floridae
- Ciona intestinalis
- Ciona savignyi
- Petromyzon marinus
- Danio rerio
- Gadus morhua
- Oreochromis niloticus
- Takifugu rubripes
- Tetraodon nigroviridis
- Gasterosteus aculeatus
- Xiphophorus maculatus
- Oryzias latipes
- Latimeria chalumnae
- Xenopus (Silurana) tropicalis
- Pelodiscus sinensis
- Anolis carolinensis
- Taeniopygia guttata
- Gallus gallus
- Meleagris gallopavo
- Ornithorhynchus anatinus
- Monodelphis domestica
- Sarcophilus harrisii
- Macropus eugenii
- Dasyurus novemcinctus
- Loxodonta africana
- Echinops telillari
- Procavia capensis
- Myotis lucifugus
- Pteropus vampyrus
- Sus scrofa
- Tursiops truncatus
- Bos taurus
- Equus caballus
- Felis catus
- Canis lupus familiaris
- Mustela putorius furo
- Alluropoda melanoleuca
- Cryptolestes cuniculus
- Cavia porcellus
- Ictidomys tridecemlineatus
- Dipodomys ordii
- Rattus norvegicus
- Mus musculus
- Tupaia belangeri
- Otolemur garrettii
- Microcebus murinus
- Tarsius syrichta
- Callithrix jacchus
- Macaca mulatta
- Nomascus leucogenys
- Pongo abelii
- Gorilla gorilla
- Pan troglodytes
- Homo sapiens
- Perkinsus marinus ATCC 50983
- Tetrahymena thermophila
- Paramecium tetraurelia strain d4 2
- Neospora caninum Liverpool
- Toxoplasma gondii
- Cryptosporidium muris RN66
- Cryptosporidium parvum Iowa II
- Cryptosporidium hominis TU502
- Theileria annulata strain Ankara
- Theileria parva strain Muguga
- Plasmodium falciparum
- Plasmodium knowlesi
- Plasmodium vivax
- Plasmodium chabaudi
- Plasmodium yoelii yoelii 17XNL
- Plasmodium berghei
- Phaeodactylum tricornutum
- Thalassiosira pseudonana
- Pythium ultimum
- Albugo liliaceae
- Hyaloperonospora arabidopsidis
- Phytophthora ramorum
- Phytophthora infestans
- Phytophthora sojae
- Trypanosoma brucei
- Trypanosoma cruzi strain CL Brener
- Leishmania braziliensis MHOM BR 75 M2904
- Leishmania mexicana MHOM GT 2001 U1103
- Leishmania major
- Leishmania donovani
- Leishmania infantum JPCM5
- Entamoeba histolytica
- Entamoeba dispar SAW760
- Dicystostellum discoideum
- Dicystostellum purpureum
- Trichomonas vaginalis G3
- Trichomonas vaginalis
- Naegleria gruberi
- Giardia lamblia ATCC 50803

- OG presence
- OG absence
- Inferred root

Dscore = 0.667

Pvalue = 2.21e-06

AdjPvalue = 2.63e-04

- Arabis thaliana
- Arabis lyrata
- Brassica rapa
- Glycine max
- Populus trichocarpa
- Vitis vinifera
- Solanum tuberosum
- Solanum lycopersicum
- Oryza sativa Indica Group
- Oryza sativa Japonica Group
- Oryza brachyantha
- Oryza glaberrima
- Hordeum vulgare
- Brachypodium distachyon
- Zea mays
- Sorghum bicolor
- Setaria italica
- Musa acuminata
- Selaginella moellendorffii
- Physcomitrella patens
- Ostreococcus tauri
- Ostreococcus lucimarinus CCE9901
- Chlamydomonas reinhardtii
- Cyanidioschyzon merolae
- Encephalitozoon hellem ATCC 50504
- Encephalitozoon intestinalis ATCC 50506
- Encephalitozoon cuniculi GB M1
- Puccinia graminis
- Puccinia triticina
- Ustilago maydis
- Melassezia globosa CBS 7966
- Cryptococcus gattii WM276
- Cryptococcus neoformans var. neoformans JEC21
- Cryptococcus neoformans var. neoformans B 3501A
- Phanerochaete chrysosporium
- Schizophyllum commune H4 B
- Coprinopsis cinerea okayama7\_130
- Laccaria bicolor S238N H82
- Schizosaccharomyces japonicus yFS275
- Schizosaccharomyces pombe
- Clavospora lusitanae ATCC 42720
- Yarrowia lipolytica
- Candida tropicalis MYA 3404
- Candida dubliniensis CD36
- Lodderomyces elongisporus NRRL YB 4239
- Scheffersomyces stipitis CBS 6054
- Meyerozyma guilliermondii ATCC 6260
- Pichia guilliermondii
- Lachancea thermotolerans
- Kluyveromyces fragilis NRRL Y 1140
- Saccharomyces cerevisiae
- Zygosaccharomyces rouxii
- Komagataella pastoris GS115
- Vanderwaltozyma polyspora DSM 70294
- Torulopsis delbrueckii
- Candida glabrata CBS 138
- Tetrapispora phaffii CBS 4417
- Naumovozyma dairensis CBS 421
- Naumovozyma castellii CBS 4309
- Eremothecium cymbalariae DBVPG\_7215
- Eremothecium gossypii
- Tuber melanosporum
- Zymoseptoria tritici
- Phaeosphaeria nodorum
- Leptosphaeria maculans
- Pyrenophora tritici repens Pt 1C BFP
- Pyrenophora teres f. teres 0 1
- Botryotinia fuckeliana
- Sclerotinia sclerotiorum
- Verticillium albo atrum VaMs.102
- Fusarium oxysporum
- Hypocrea virens
- Hypocrea jecorina
- Nectria haematococca
- Gibberella moniliformis
- Gibberella zeae PH 1
- Gibberella zeae
- Gaeumannomyces graminis
- Magnaporthe grisea
- Magnaporthe poae
- Magnaporthe oryzae
- Podospira anserina S mat
- Neurospora crassa
- Sordaria macrospora k hell
- Myceliophthora thermophila ATCC 42464
- Chaetomium globosum CBS 148.51
- Thielavia terrestris NRRL 8126
- Uncinocarpus reesii 1704
- Ajellomyces capsulatus Nam1
- Ajellomyces dermatitidis SLH14081
- Paracoccidioides sp. lutzi Fb01
- Coccidioides posadasii C735 delta SOWgp
- Coccidioides immitis RS
- Trichophyton rubrum CBS 118892
- Trichophyton verrucosum HKI 0517
- Arthroderma benhamiae CBS 112371
- Arthroderma gypseum CBS 118893
- Arthroderma otae CBS 113480
- Talaromyces stipitatus ATCC 10500
- Neosartorya fischeri
- Emericella nidulans
- Penicillium chrysogenum Wisconsin 54 1255
- Penicillium marneffei ATCC 18224
- Aspergillus clavatus
- Aspergillus flavus
- Aspergillus oryzae
- Aspergillus niger
- Aspergillus fumigatus
- Aspergillus terreus
- Monosiga brevicollis MX1
- Amphimedon queenslandica
- Trichoplax adhaerens
- Nematostella vectensis
- Hydra magnipapillata
- Schistosoma mansoni
- Trichinella spiralis
- Pristionchus pacificus
- Caenorhabditis brenneri
- Caenorhabditis briggsae
- Caenorhabditis remanei
- Caenorhabditis japonica
- Caenorhabditis elegans
- Ixodes scapularis
- Daphnia pulex
- Pediculus humanus
- Acyrtosiphon pisum
- Tribolium castaneum
- Nasonia vitripennis
- Apis mellifera
- Atta cephalotes
- Bombyx mori
- Danaus plexippus
- Heliconius melpomene
- Culex quinquefasciatus
- Aedes aegypti
- Anopheles gambiae
- Anopheles darlingi
- Drosophila virilis
- Drosophila grimshawi
- Drosophila willistoni
- Drosophila pseudoobscura
- Drosophila ananassae
- Drosophila melanogaster
- Drosophila yakuba
- Strongylocentrotus purpuratus
- Branchiostoma floridae
- Ciona intestinalis
- Ciona savignyi
- Petromyzon marinus
- Danio rerio
- Gadus morhua
- Oreochromis niloticus
- Takifugu rubripes
- Tetraodon nigroviridis
- Gasterosteus aculeatus
- Xiphophorus maculatus
- Oryzias latipes
- Latimeria chalumnae
- Xenopus (Silurana) tropicalis
- Pelodiscus sinensis
- Anolis carolinensis
- Taeniopygia guttata
- Gallus gallus
- Meleagris gallopavo
- Ornithorhynchus anatinus
- Monodelphis domestica
- Sarcophilus harrisii
- Macropus eugenii
- Dasyurus novemcinctus
- Loxodonta africana
- Echinops telillari
- Procavia capensis
- Myotis lucifugus
- Pteropus vampyrus
- Sus scrofa
- Tursiops truncatus
- Bos taurus
- Equus caballus
- Felis catus
- Canis lupus familiaris
- Mustela putorius furo
- Alluropoda melanoleuca
- Cryptolestes cuniculus
- Cavia porcellus
- Ictidomys tridecemlineatus
- Dipodomys ordii
- Rattus norvegicus
- Mus musculus
- Tupaia belangeri
- Urolemur garnettii
- Microcebus murinus
- Tarsius syrichta
- Callithrix jacchus
- Macaca mulatta
- Nomascus leucogenys
- Pongo abelii
- Gorilla gorilla
- Pan troglodytes
- Homo sapiens
- Perkinsus marinus ATCC 50983
- Tetrahymena thermophila
- Paramecium tetraurelia strain d4 2
- Neospora caninum Liverpool
- Toxoplasma gondii
- Cryptosporidium muris RN66
- Cryptosporidium parvum Iowa II
- Cryptosporidium hominis TU502
- Theileria annulata strain Ankara
- Theileria parva strain Muguga
- Plasmodium falciparum
- Plasmodium knowlesi
- Plasmodium vivax
- Plasmodium chabaudi
- Plasmodium yoelii yoelii 17XNL
- Plasmodium berghei
- Phaeodactylum tricornutum
- Thalassiosira pseudonana
- Pythium ultimum
- Albugo liliaceae
- Hyaloperonospora arabidopsidis
- Phytophthora ramorum
- Phytophthora infestans
- Phytophthora sojae
- Trypanosoma brucei
- Trypanosoma cruzi strain CL Brener
- Leishmania braziliensis MHOM BR 75 M2904
- Leishmania mexicana MHOM GT 2001 U1103
- Leishmania major
- Leishmania donovani
- Leishmania infantum JPCM5
- Entamoeba histolytica
- Entamoeba dispar SAW760
- Dicystostellum discoideum
- Dicystostellum purpureum
- Trichomonas vaginalis G3
- Trichomonas vaginalis
- Naegleria gruberi
- Giardia lamblia ATCC 50803

- OG presence
- OG absence
- Inferred root

Dscore = 1  
Pvalue = 5.17e-07  
AdjPvalue = 6.15e-05

- Arabis thaliana
- Arabis lyrata
- Brassica rapa
- Glycine max
- Populus trichocarpa
- Vitis vinifera
- Solanum tuberosum
- Solanum lycopersicum
- Oryza sativa Indica Group
- Oryza sativa Japonica Group
- Oryza brachyantha
- Oryza glaberrima
- Hordeum vulgare
- Brachypodium distachyon
- Zea mays
- Sorghum bicolor
- Setaria italica
- Musa acuminata
- Selaginella moellendorffii
- Physcomitrella patens
- Ostreococcus tauri
- Ostreococcus lucimarinus CCE9901
- Chlamydomonas reinhardtii
- Cyanidioschyzon merolae
- Encephalitozoon hellem ATCC 50504
- Encephalitozoon intestinalis ATCC 50506
- Encephalitozoon cuniculi GB M1
- Puccinia graminis
- Puccinia triticina
- Ustilago maydis
- Melassezia globosa CBS 7966
- Cryptococcus gattii WM276
- Cryptococcus neoformans var. neoformans JEC21
- Cryptococcus neoformans var. neoformans B 3501A
- Phanerochaete chrysosporium
- Schizophyllum commune H4 B
- Coprinopsis cinerea okayama7\_130
- Laccaria bicolor S238N H82
- Schizosaccharomyces japonicus yFS275
- Schizosaccharomyces pombe
- Clavospora lusitanae ATCC 42720
- Yarrowia lipolytica
- Candida tropicalis MYA 3404
- Candida dubliniensis CD36
- Lodderomyces elongisporus NRRL YB 4239
- Scheffersomyces stipitis CBS 6054
- Meyerozyma guilliermondii ATCC 6260
- Pichia guilliermondii
- Lachancea thermotolerans
- Kluyveromyces fragilis NRRL Y 1140
- Saccharomyces cerevisiae
- Zygosaccharomyces rouxii
- Komagataella pastoris GS115
- Vanderwaltozyma polyspora DSM 70294
- Torulopsis delbrueckii
- Candida glabrata CBS 138
- Tetrapispora phaffii CBS 4417
- Naumovozyma dairensis CBS 421
- Naumovozyma castellii CBS 4309
- Eremothecium cymbalariae DBVPG\_7215
- Eremothecium gossypii
- Tuber melanosporum
- Zymoseptoria tritici
- Phaeosphaeria nodorum
- Leptosphaeria maculans
- Pyrenophora tritici repens Pt 1C BFP
- Pyrenophora teres f. teres 0 1
- Botryotinia fuckeliana
- Sclerotinia sclerotiorum
- Verticillium albo atrum VaMs.102
- Fusarium oxysporum
- Hypocrea virens
- Hypocrea jecorina
- Nectria haematococca
- Gibberella moniliformis
- Gibberella zeae PH 1
- Gibberella zeae
- Gaeumannomyces graminis
- Magnaporthe grisea
- Magnaporthe poae
- Magnaporthe oryzae
- Podospira anserina S mat
- Neurospora crassa
- Sordaria macrospora k hell
- Myceliophthora thermophila ATCC 42464
- Chaetomium globosum CBS 148.51
- Thielavia terrestris NRRL 8126
- Uncinocarpus reesii 1704
- Ajellomyces capsulatus Nam1
- Ajellomyces dermatitidis SLH14081
- Paracoccidioides sp. lutzi Fb01
- Coccidioides posadasii C735 delta SOWgp
- Coccidioides immitis RS
- Trichophyton rubrum CBS 118892
- Trichophyton verrucosum HKI 0517
- Arthroderma benhamiae CBS 112371
- Arthroderma gypseum CBS 118893
- Arthroderma otae CBS 113480
- Talaromyces stipitatus ATCC 10500
- Neosartorya fischeri
- Emericella nidulans
- Penicillium chrysogenum Wisconsin 54 1255
- Penicillium marneffei ATCC 18224
- Aspergillus clavatus
- Aspergillus flavus
- Aspergillus oryzae
- Aspergillus niger
- Aspergillus fumigatus
- Aspergillus terreus
- Monosiga brevicollis MX1
- Amphimedon queenslandica
- Trichoplax adhaerens
- Nematostella vectensis
- Hydra magnipapillata
- Schistosoma mansoni
- Trichiella spiralis
- Pristionchus pacificus
- Caenorhabditis brenneri
- Caenorhabditis briggsae
- Caenorhabditis remanei
- Caenorhabditis japonica
- Caenorhabditis elegans
- Ixodes scapularis
- Daphnia pulex
- Pediculus humanus
- Acyrtosiphon pisum
- Tribolium castaneum
- Nasonia vitripennis
- Apis mellifera
- Atta cephalotes
- Bombyx mori
- Danaus plexippus
- Heliconius melpomene
- Culex quinquefasciatus
- Aedes aegypti
- Anopheles gambiae
- Anopheles darlingi
- Drosophila virilis
- Drosophila grimshawi
- Drosophila willistoni
- Drosophila pseudoobscura
- Drosophila ananassae
- Drosophila melanogaster
- Drosophila yakuba
- Strongylocentrotus purpuratus
- Branchiostoma floridae
- Ciona intestinalis
- Ciona savignyi
- Petromyzon marinus
- Danio rerio
- Gadus morhua
- Oreochromis niloticus
- Takifugu rubripes
- Tetraodon nigroviridis
- Gasterosteus aculeatus
- Xiphophorus maculatus
- Oryzias latipes
- Latimeria chalumnae
- Xenopus (Silurana) tropicalis
- Pelodiscus sinensis
- Anolis carolinensis
- Taeniopygia guttata
- Gallus gallus
- Meleagris gallopavo
- Ornithorhynchus anatinus
- Monodelphis domestica
- Sarcophilus harrisii
- Macropus eugenii
- Dasyurus novemcinctus
- Loxodonta africana
- Echinops telillari
- Procavia capensis
- Myotis lucifugus
- Pteropus vampyrus
- Sus scrofa
- Tursiops truncatus
- Bos taurus
- Equus caballus
- Felis catus
- Canis lupus familiaris
- Mustela putorius furo
- Ailuropoda melanoleuca
- Cryctolopus canaliculatus
- Cavia porcellus
- Ictidomys tridecemlineatus
- Dipodomys ordii
- Rattus norvegicus
- Mus musculus
- Tupaia belangeri
- Otolomus garretti
- Microcebus murinus
- Tarsius syrichta
- Callithrix jacchus
- Macaca mulatta
- Nomascus leucogenys
- Pongo abelii
- Gorilla gorilla
- Pan troglodytes
- Homo sapiens
- Perkinsus marinus ATCC 50983
- Tetrahymena thermophila
- Paramecium tetraurelia strain d4 2
- Neospora caninum Liverpool
- Toxoplasma gondii
- Cryptosporidium muris RN66
- Cryptosporidium parvum Iowa II
- Cryptosporidium hominis TU502
- Theileria annulata strain Ankara
- Theileria parva strain Muguga
- Plasmodium falciparum
- Plasmodium knowlesi
- Plasmodium vivax
- Plasmodium chabaudi
- Plasmodium yoelii yoelii 17XNL
- Plasmodium berghei
- Phaeodactylum tricornutum
- Thalassiosira pseudonana
- Pythium ultimum
- Albugo liliaceae
- Hyaloperonospora arabidopsidis
- Phytophthora ramorum
- Phytophthora infestans
- Phytophthora sojae
- Trypanosoma brucei
- Trypanosoma cruzi strain CL Brener
- Leishmania braziliensis MHOM BR 75 M2904
- Leishmania mexicana MHOM GT 2001 U1103
- Leishmania major
- Leishmania donovani
- Leishmania infantum JPCM5
- Entamoeba histolytica
- Entamoeba dispar SAW760
- Dicystostellum discoideum
- Dicystostellum purpureum
- Trichomonas vaginalis G3
- Trichomonas vaginalis
- Naegleria gruberi
- Giardia lamblia ATCC 50803

- OG presence
- OG absence
- Inferred root

Dscore = 1  
Pvalue = 2.67e-07  
AdjPvalue = 3.18e-05

- Arabis thaliana
- Arabis lyrata
- Brassica rapa
- Glycine max
- Populus trichocarpa
- Vitis vinifera
- Solanum tuberosum
- Solanum lycopersicum
- Oryza sativa Indica Group
- Oryza sativa Japonica Group
- Oryza brachyantha
- Oryza glaberrima
- Hordeum vulgare
- Brachypodium distachyon
- Zea mays
- Sorghum bicolor
- Setaria italica
- Musa acuminata
- Selaginella moellendorffii
- Physcomitrella patens
- Ostreococcus tauri
- Ostreococcus lucimarinus CCE9901
- Chlamydomonas reinhardtii
- Cyanidioschyzon merolae
- Encephalitozoon hellem ATCC 50504
- Encephalitozoon intestinalis ATCC 50506
- Encephalitozoon cuniculi GB M1
- Puccinia graminis
- Puccinia triticina
- Ustilago maydis
- Melassezia globosa CBS 7966
- Cryptococcus gattii WM276
- Cryptococcus neoformans var. neoformans JEC21
- Cryptococcus neoformans var. neoformans B 3501A
- Phanerochaete chrysosporium
- Schizophyllum commune H4 B
- Coprinopsis cinerea okayama7\_130
- Laccaria bicolor S238N H82
- Schizosaccharomyces japonicus yFS275
- Schizosaccharomyces pombe
- Clavospora lusitanae ATCC 42720
- Yarrowia lipolytica
- Candida tropicalis MYA 3404
- Candida dubliniensis CD36
- Lodderomyces elongisporus NRRL YB 4239
- Scheffersomyces stipitis CBS 6054
- Meyerozyma guilliermondii ATCC 6260
- Pichia guilliermondii
- Lachancea thermotolerans
- Kluyveromyces fragilis NRRL Y 1140
- Saccharomyces cerevisiae
- Zygosaccharomyces rouxii
- Komagataella pastoris GS115
- Vanderwaltozyma polyspora DSM 70294
- Torulopsis delbrueckii
- Candida glabrata CBS 138
- Tetrapispora phaffii CBS 4417
- Naumovozyma dairensis CBS 421
- Naumovozyma castellii CBS 4309
- Eremothecium cymbalariae DBVPG\_7215
- Eremothecium gossypii
- Tuber melanosporum
- Zymoseptoria tritici
- Phaeosphaeria nodorum
- Leptosphaeria maculans
- Pyrenophora tritici repens Pt 1C BFP
- Pyrenophora teres f. teres 0 1
- Botryotinia fuckeliana
- Sclerotinia sclerotiorum
- Verticillium albo atrum VaMs.102
- Fusarium oxysporum
- Hypocrea virens
- Hypocrea jecorina
- Nectria haematococca
- Gibberella moniliformis
- Gibberella zeae PH 1
- Gibberella zeae
- Gaeumannomyces graminis
- Magnaporthe grisea
- Magnaporthe poae
- Magnaporthe oryzae
- Podospira anserina S mat
- Neurospora crassa
- Sordaria macrospora k hell
- Myceliophthora thermophila ATCC 42464
- Chaetomium globosum CBS 148.51
- Thielavia terrestris NRRL 8126
- Uncinocarpus reesii 1704
- Ajellomyces capsulatus Nam1
- Ajellomyces dermatitidis SLH14081
- Paracoccidioides sp. lutzi Fb01
- Coccidioides posadasii C735 delta SOWgp
- Coccidioides immitis RS
- Trichophyton rubrum CBS 118892
- Trichophyton verrucosum HKI 0517
- Arthroderma benhamiae CBS 112371
- Arthroderma gypseum CBS 118893
- Arthroderma otae CBS 113480
- Talaromyces stipitatus ATCC 10500
- Neosartorya fischeri
- Emericella nidulans
- Penicillium chrysogenum Wisconsin 54 1255
- Penicillium marneffei ATCC 18224
- Aspergillus clavatus
- Aspergillus flavus
- Aspergillus oryzae
- Aspergillus niger
- Aspergillus fumigatus
- Aspergillus terreus
- Monosiga brevicollis MX1
- Amphimedon queenslandica
- Trichoplax adhaerens
- Nematostella vectensis
- Hydra magnipapillata
- Schistosoma mansoni
- Trichinella spiralis
- Pristionchus pacificus
- Caenorhabditis brenneri
- Caenorhabditis briggsae
- Caenorhabditis remanei
- Caenorhabditis japonica
- Caenorhabditis elegans
- Ixodes scapularis
- Daphnia pulex
- Pediculus humanus
- Acyrtosiphon pisum
- Tribolium castaneum
- Nasonia vitripennis
- Apis mellifera
- Atta cephalotes
- Bombyx mori
- Danaus plexippus
- Heliconius melpomene
- Culex quinquefasciatus
- Aedes aegypti
- Anopheles gambiae
- Anopheles darlingi
- Drosophila virilis
- Drosophila grimshawi
- Drosophila willistoni
- Drosophila pseudoobscura
- Drosophila ananassae
- Drosophila melanogaster
- Drosophila yakuba
- Strongylocentrotus purpuratus
- Branchiostoma floridae
- Ciona intestinalis
- Ciona savignyi
- Petromyzon marinus
- Danio rerio
- Gadus morhua
- Oreochromis niloticus
- Takifugu rubripes
- Tetraodon nigroviridis
- Gasterosteus aculeatus
- Xiphophorus maculatus
- Oryzias latipes
- Latimeria chalumnae
- Xenopus (Silurana) tropicalis
- Pelodiscus sinensis
- Anolis carolinensis
- Taeniopygia guttata
- Gallus gallus
- Meleagris gallopavo
- Ornithorhynchus anatinus
- Monodelphis domestica
- Sarcophilus harrisii
- Macropus eugenii
- Dasyurus novemcinctus
- Loxodonta africana
- Echinops telfairii
- Procavia capensis
- Myotis lucifugus
- Pteropus vampyrus
- Sus scrofa
- Tursiops truncatus
- Bos taurus
- Equus caballus
- Felis catus
- Canis lupus familiaris
- Mustela putorius furo
- Alluropoda melanoleuca
- Cryptolestes cuniculus
- Cavia porcellus
- Ictidomys tridecemlineatus
- Dipodomys ordii
- Rattus norvegicus
- Mus musculus
- Tupaia belangeri
- Otolomus garretti
- Microcebus murinus
- Tarsius syrichta
- Callithrix jacchus
- Macaca mulatta
- Nomascus leucogenys
- Pongo abelii
- Gorilla gorilla
- Pan troglodytes
- Homo sapiens
- Perkinsus marinus ATCC 50983
- Tetrahymena thermophila
- Paramecium tetraurelia strain d4 2
- Neospora caninum Liverpool
- Toxoplasma gondii
- Cryptosporidium muris RN66
- Cryptosporidium parvum Iowa II
- Cryptosporidium hominis TU502
- Theileria annulata strain Ankara
- Theileria parva strain Muguga
- Plasmodium falciparum
- Plasmodium knowlesi
- Plasmodium vivax
- Plasmodium chabaudi
- Plasmodium yoelii yoelii 17XNL
- Plasmodium berghei
- Phaeodactylum tricornutum
- Thalassiosira pseudonana
- Pythium ultimum
- Albugo liliaceae
- Hyaloperonospora arabidopsidis
- Phytophthora ramorum
- Phytophthora infestans
- Phytophthora sojae
- Trypanosoma brucei
- Trypanosoma cruzi strain CL Brener
- Leishmania braziliensis MHOM BR 75 M2904
- Leishmania mexicana MHOM GT 2001 U1103
- Leishmania major
- Leishmania donovani
- Leishmania infantum JPCM5
- Entamoeba histolytica
- Entamoeba dispar SAW760
- Dicystostellum discoideum
- Dicystostellum purpureum
- Trichomonas vaginalis G3
- Trichomonas vaginalis
- Naegleria gruberi
- Giardia lamblia ATCC 50803

- OG presence
- OG absence
- Inferred root

Dscore = 1  
Pvalue = 9.40e-07  
AdjPvalue = 1.12e-04

- Arabis thaliana
- Arabis lyrata
- Brassica rapa
- Glycine max
- Populus trichocarpa
- Vitis vinifera
- Solanum tuberosum
- Solanum lycopersicum
- Oryza sativa Indica Group
- Oryza sativa Japonica Group
- Oryza brachyantha
- Oryza glaberrima
- Hordeum vulgare
- Brachypodium distachyon
- Zea mays
- Sorghum bicolor
- Setaria italica
- Musa acuminata
- Selaginella moellendorffii
- Physcomitrella patens
- Ostreococcus tauri
- Ostreococcus lucimarinus CCE9901
- Chlamydomonas reinhardtii
- Cyanidioschyzon merolae
- Encephalitozoon hellem ATCC 50504
- Encephalitozoon intestinalis ATCC 50506
- Encephalitozoon cuniculi GB M1
- Puccinia graminis
- Puccinia triticina
- Ustilago maydis
- Malassezia globosa CBS 7966
- Cryptococcus gattii WM276
- Cryptococcus neoformans var. neoformans JEC21
- Cryptococcus neoformans var. neoformans B 3501A
- Phanerochaete chrysosporium
- Schizophyllum commune H4 B
- Coprinopsis cinerea okayama7\_130
- Laccaria bicolor S238N H82
- Schizosaccharomyces japonicus yFS275
- Schizosaccharomyces pombe
- Clavospora lusitanae ATCC 42720
- Yarrowia lipolytica
- Candida tropicalis MYA 3404
- Candida dubliniensis CD36
- Lodderomyces elongisporus NRRL YB 4239
- Scheffersomyces stipitis CBS 6054
- Meyerozyma guilliermondii ATCC 6260
- Pichia guilliermondii
- Lachancea thermotolerans
- Kluyveromyces fragilis NRRL Y 1140
- Saccharomyces cerevisiae
- Zygosaccharomyces rouxii
- Komagataella pastoris GS115
- Vanderwaltozyma polyspora DSM 70294
- Torulopsis delbrueckii
- Candida glabrata CBS 138
- Tetrapispora phaffii CBS 4417
- Naumovozyma dairensis CBS 421
- Naumovozyma castellii CBS 4309
- Eremothecium cymbalariae DBVPG\_7215
- Eremothecium gossypii
- Tuber melanosporum
- Zymoseptoria tritici
- Phaeosphaeria nodorum
- Leptosphaeria maculans
- Pyrenophora tritici repens Pt 1C BFP
- Pyrenophora teres f. teres 0 1
- Botryotinia fuckeliana
- Sclerotinia sclerotiorum
- Verticillium albo atrum VaMs.102
- Fusarium oxysporum
- Hypocrea virens
- Hypocrea jecorina
- Nectria haematococca
- Gibberella moniliformis
- Gibberella zeae PH 1
- Gibberella zeae
- Gaeumannomyces graminis
- Magnaporthe grisea
- Magnaporthe poae
- Magnaporthe oryzae
- Podospira anserina S mat
- Neurospora crassa
- Sordaria macrospora k hell
- Myceliophthora thermophila ATCC 42464
- Chaetomium globosum CBS 148.51
- Thielavia terrestris NRRL 8126
- Uncinocarpus reesii 1704
- Ajellomyces capsulatus Nam1
- Ajellomyces dermatitidis SLH14081
- Paracoccidioides sp. lutzi Fb01
- Coccidioides posadasii C735 delta SOWgp
- Coccidioides immitis RS
- Trichophyton rubrum CBS 118892
- Trichophyton verrucosum HKI 0517
- Arthroderma benhamiae CBS 112371
- Arthroderma gypseum CBS 118893
- Arthroderma otae CBS 113480
- Talaromyces stipitatus ATCC 10500
- Neosartorya fischeri
- Emericella nidulans
- Penicillium chrysogenum Wisconsin 54 1255
- Penicillium marneffei ATCC 18224
- Aspergillus clavatus
- Aspergillus flavus
- Aspergillus oryzae
- Aspergillus niger
- Aspergillus fumigatus
- Aspergillus terreus
- Monosiga brevicollis MX1
- Amphimedon queenslandica
- Trichoplax adhaerens
- Nematostella vectensis
- Hydra magnipapillata
- Schistosoma mansoni
- Trichiella spiralis
- Pristionchus pacificus
- Caenorhabditis brenneri
- Caenorhabditis briggsae
- Caenorhabditis remanei
- Caenorhabditis japonica
- Caenorhabditis elegans
- Ixodes scapularis
- Daphnia pulex
- Pediculus humanus
- Acyrtosiphon pisum
- Tribolium castaneum
- Nasonia vitripennis
- Apis mellifera
- Atta cephalotes
- Bombyx mori
- Danaus plexippus
- Heliconius melpomene
- Culex quinquefasciatus
- Aedes aegypti
- Anopheles gambiae
- Anopheles darlingi
- Drosophila virilis
- Drosophila grimshawi
- Drosophila willistoni
- Drosophila pseudoobscura
- Drosophila ananassae
- Drosophila melanogaster
- Drosophila yakuba
- Strongylocentrotus purpuratus
- Branchiostoma floridae
- Ciona intestinalis
- Ciona savignyi
- Petromyzon marinus
- Danio rerio
- Gadus morhua
- Oreochromis niloticus
- Takifugu rubripes
- Tetraodon nigroviridis
- Gasterosteus aculeatus
- Xiphophorus maculatus
- Oryzias latipes
- Latimeria chalumnae
- Xenopus (Silurana) tropicalis
- Pelodiscus sinensis
- Anolis carolinensis
- Taeniopygia guttata
- Gallus gallus
- Meleagris gallopavo
- Ornithorhynchus anatinus
- Monodelphis domestica
- Sarcophilus harrisii
- Macropus eugenii
- Dasyurus novemcinctus
- Loxodonta africana
- Echinops telillari
- Procavia capensis
- Myotis lucifugus
- Pteropus vampyrus
- Sus scrofa
- Tursiops truncatus
- Bos taurus
- Equus caballus
- Felis catus
- Canis lupus familiaris
- Mustela putorius furo
- Alluropoda melanoleuca
- Cryptolestes cuniculus
- Cavia porcellus
- Ictidomys tridecemlineatus
- Dipodomys ordii
- Rattus norvegicus
- Mus musculus
- Tupaia belangeri
- Otolemur garnettii
- Microcebus murinus
- Tarsius syrichta
- Callithrix jacchus
- Macaca mulatta
- Nomascus leucogenys
- Pongo abelii
- Gorilla gorilla
- Pan troglodytes
- Homo sapiens
- Perkinsus marinus ATCC 50983
- Tetrahymena thermophila
- Paramecium tetraurelia strain d4 2
- Neospora caninum Liverpool
- Toxoplasma gondii
- Cryptosporidium muris RN66
- Cryptosporidium parvum Iowa II
- Cryptosporidium hominis TU502
- Theileria annulata strain Ankara
- Theileria parva strain Muguga
- Plasmodium falciparum
- Plasmodium knowlesi
- Plasmodium vivax
- Plasmodium chabaudi
- Plasmodium yoelii yoelii 17XNL
- Plasmodium berghei
- Phaeodactylum tricornutum
- Thalassiosira pseudonana
- Pythium ultimum
- Albugo liliaceae
- Hyaloperonospora arabidopsidis
- Phytophthora ramorum
- Phytophthora infestans
- Phytophthora sojae
- Trypanosoma brucei
- Trypanosoma cruzi strain CL Brener
- Leishmania braziliensis MHOM BR 75 M2904
- Leishmania mexicana MHOM GT 2001 U1103
- Leishmania major
- Leishmania donovani
- Leishmania infantum JPCM5
- Entamoeba histolytica
- Entamoeba dispar SAW760
- Dicystostellum discoideum
- Dicystostellum purpureum
- Trichomonas vaginalis G3
- Trichomonas vaginalis
- Naegleria gruberi
- Giardia lamblia ATCC 50803

- OG presence
- OG absence
- Inferred root

Dscore = 1  
Pvalue = 3.53e-07  
AdjPvalue = 4.21e-05

- Arabis thaliana
- Arabis lyrata
- Brassica rapa
- Glycine max
- Populus trichocarpa
- Vitis vinifera
- Solanum tuberosum
- Solanum lycopersicum
- Oryza sativa Indica Group
- Oryza sativa Japonica Group
- Oryza brachyantha
- Oryza glaberrima
- Hordeum vulgare
- Brachypodium distachyon
- Zea mays
- Sorghum bicolor
- Setaria italica
- Musa acuminata
- Selaginella moellendorffii
- Physcomitrella patens
- Ostreococcus tauri
- Ostreococcus lucimarinus CCE9901
- Chlamydomonas reinhardtii
- Cyanidioschyzon merolae
- Encephalitozoon hellem ATCC 50504
- Encephalitozoon intestinalis ATCC 50506
- Encephalitozoon cuniculi GB M1
- Puccinia graminis
- Puccinia triticina
- Ustilago maydis
- Melassezia globosa CBS 7966
- Cryptococcus gattii WM276
- Cryptococcus neoformans var. neoformans JEC21
- Cryptococcus neoformans var. neoformans B 3501A
- Phanerochaete chrysosporium
- Schizophyllum commune H4 B
- Coprinopsis cinerea okayama7\_130
- Laccaria bicolor S238N H82
- Schizosaccharomyces japonicus yFS275
- Schizosaccharomyces pombe
- Clavospora lusitanae ATCC 42720
- Yarrowia lipolytica
- Candida tropicalis MYA 3404
- Candida dubliniensis CD36
- Lodderomyces elongisporus NRRL YB 4239
- Scheffersomyces stipitis CBS 6054
- Meyerozyma guilliermondii ATCC 6260
- Pichia guilliermondii
- Lachancea thermotolerans
- Kluyveromyces fragilis NRRL Y 1140
- Saccharomyces cerevisiae
- Zygosaccharomyces rouxii
- Komagataella pastoris GS115
- Vanderwaltozyma polyspora DSM 70294
- Torulopsis delbrueckii
- Candida glabrata CBS 138
- Tetrapispora phaffii CBS 4417
- Naumovozyma dairensis CBS 421
- Naumovozyma castellii CBS 4309
- Eremothecium cymbalariae DBVPG\_7215
- Eremothecium gossypii
- Tuber melanosporum
- Zymoseptoria tritici
- Phaeosphaeria nodorum
- Leptosphaeria maculans
- Pyrenophora tritici repens Pt 1C BFP
- Pyrenophora teres f. teres 0 1
- Botryotinia fuckeliana
- Sclerotinia sclerotiorum
- Verticillium albo atrum VaMs.102
- Fusarium oxysporum
- Hypocrea virens
- Hypocrea jecorina
- Nectria haematococca
- Gibberella moniliformis
- Gibberella zeae PH 1
- Gibberella zeae
- Gaeumannomyces graminis
- Magnaporthe grisea
- Magnaporthe poae
- Magnaporthe oryzae
- Podospira anserina S mat
- Neurospora crassa
- Sordaria macrospora k hell
- Myceliophthora thermophila ATCC 42464
- Chaetomium globosum CBS 148.51
- Thielavia terrestris NRRL 8126
- Uncinocarpus reesii 1704
- Ajellomyces capsulatus Nam1
- Ajellomyces dermatitidis SLH14081
- Paracoccidioides sp. lutzi Fb01
- Coccidioides posadasii C735 delta SOWgp
- Coccidioides immitis RS
- Trichophyton rubrum CBS 118892
- Trichophyton verrucosum HKI 0517
- Arthroderma benhamiae CBS 112371
- Arthroderma gypseum CBS 118893
- Arthroderma otae CBS 113480
- Talaromyces stipitatus ATCC 10500
- Neosartorya fischeri
- Emericella nidulans
- Penicillium chrysogenum Wisconsin 54 1255
- Penicillium marneffei ATCC 18224
- Aspergillus clavatus
- Aspergillus flavus
- Aspergillus oryzae
- Aspergillus niger
- Aspergillus fumigatus
- Aspergillus terreus
- Monosiga brevicollis MX1
- Amphimedon queenslandica
- Trichoplax adhaerens
- Nematostella vectensis
- Hydra magnipapillata
- Schistosoma mansoni
- Trichinella spiralis
- Pristionchus pacificus
- Caenorhabditis brenneri
- Caenorhabditis briggsae
- Caenorhabditis remanei
- Caenorhabditis japonica
- Caenorhabditis elegans
- Ixodes scapularis
- Daphnia pulex
- Pediculus humanus
- Acyrtosiphon pisum
- Tribolium castaneum
- Nasonia vitripennis
- Apis mellifera
- Atta cephalotes
- Bombyx mori
- Danaus plexippus
- Heliconius melpomene
- Culex quinquefasciatus
- Aedes aegypti
- Anopheles gambiae
- Anopheles darlingi
- Drosophila virilis
- Drosophila grimshawi
- Drosophila willistoni
- Drosophila pseudoobscura
- Drosophila ananassae
- Drosophila melanogaster
- Drosophila yakuba
- Strongylocentrotus purpuratus
- Branchiostoma floridae
- Ciona intestinalis
- Ciona savignyi
- Petromyzon marinus
- Danio rerio
- Gadus morhua
- Oreochromis niloticus
- Takifugu rubripes
- Tetraodon nigroviridis
- Gasterosteus aculeatus
- Xiphophorus maculatus
- Oryzias latipes
- Latimeria chalumnae
- Xenopus (Silurana) tropicalis
- Pelodiscus sinensis
- Anolis carolinensis
- Taeniopygia guttata
- Gallus gallus
- Meleagris gallopavo
- Ornithorhynchus anatinus
- Monodelphis domestica
- Sarcophilus harrisii
- Macropus eugenii
- Dasyurus novemcinctus
- Loxodonta africana
- Echinops telillari
- Procavia capensis
- Myotis lucifugus
- Pteropus vampyrus
- Sus scrofa
- Tursiops truncatus
- Bos taurus
- Equus caballus
- Felis catus
- Canis lupus familiaris
- Mustela putorius furo
- Alluropoda melanoleuca
- Cryptolestes cuniculus
- Cavia porcellus
- Ictidomys tridecemlineatus
- Dipodomys ordii
- Rattus norvegicus
- Mus musculus
- Tupaia belangeri
- Otolemur garnettii
- Microcebus murinus
- Tarsius syrichta
- Callithrix jacchus
- Macaca mulatta
- Nomascus leucogenys
- Pongo abelii
- Gorilla gorilla
- Pan troglodytes
- Homo sapiens
- Perkinsus marinus ATCC 50983
- Tetrahymena thermophila
- Paramecium tetraurelia strain d4 2
- Neospora caninum Liverpool
- Toxoplasma gondii
- Cryptosporidium muris RN66
- Cryptosporidium parvum Iowa II
- Cryptosporidium hominis TU502
- Theileria annulata strain Ankara
- Theileria parva strain Muguga
- Plasmodium falciparum
- Plasmodium knowlesi
- Plasmodium vivax
- Plasmodium chabaudi
- Plasmodium yoelii yoelii 17XNL
- Plasmodium berghei
- Phaeodactylum tricornutum
- Thalassiosira pseudonana
- Pythium ultimum
- Albugo liliaceae
- Hyaloperonospora arabidopsidis
- Phytophthora ramorum
- Phytophthora infestans
- Phytophthora sojae
- Trypanosoma brucei
- Trypanosoma cruzi strain CL Brener
- Leishmania braziliensis MHOM BR 75 M2904
- Leishmania mexicana MHOM GT 2001 U1103
- Leishmania major
- Leishmania donovani
- Leishmania infantum JPCM5
- Entamoeba histolytica
- Entamoeba dispar SAW760
- Dicystostellum discoideum
- Dicystostellum purpureum
- Trichomonas vaginalis G3
- Trichomonas vaginalis
- Naegleria gruberi
- Giardia lamblia ATCC 50803

- OG presence
- OG absence
- Inferred root

Dscore = 0.667  
Pvalue = 3.50e-06  
AdjPvalue = 4.16e-04



- Arabis thaliana
- Arabis lyrata
- Brassica rapa
- Glycine max
- Populus trichocarpa
- Vitis vinifera
- Solanum tuberosum
- Solanum lycopersicum
- Oryza sativa Indica Group
- Oryza sativa Japonica Group
- Oryza brachyantha
- Oryza glaberrima
- Hordeum vulgare
- Brachypodium distachyon
- Zea mays
- Sorghum bicolor
- Setaria italica
- Musa acuminata
- Selaginella moellendorffii
- Physcomitrella patens
- Ostreococcus tauri
- Ostreococcus lucimarinus CCE9901
- Chlamydomonas reinhardtii
- Cyanidioschyzon merolae
- Encephalitozoon hellem ATCC 50504
- Encephalitozoon intestinalis ATCC 50506
- Encephalitozoon cuniculi GB M1
- Puccinia graminis
- Puccinia triticina
- Ustilago maydis
- Melassezia globosa CBS 7966
- Cryptococcus gattii WM276
- Cryptococcus neoformans var. neoformans JEC21
- Cryptococcus neoformans var. neoformans B 3501A
- Phanerochaete chrysosporium
- Schizophyllum commune H4 B
- Coprinopsis cinerea okayama7\_130
- Laccaria bicolor S238N H82
- Schizosaccharomyces japonicus yFS275
- Schizosaccharomyces pombe
- Clavospora lusitaniae ATCC 42720
- Yarrowia lipolytica
- Candida tropicalis MYA 3404
- Candida dubliniensis CD36
- Lodderomyces elongisporus NRRL YB 4239
- Scheffersomyces stipitis CBS 6054
- Meyerozyma guilliermondii ATCC 6260
- Pichia guilliermondii
- Lachancea thermotolerans
- Kluyveromyces fragilis NRRL Y 1140
- Saccharomyces cerevisiae
- Zygosaccharomyces rouxii
- Komagataella pastoris GS115
- Vanderwaltozyma polyspora DSM 70294
- Torulopsis delbrueckii
- Candida glabrata CBS 138
- Tetrapispora phaffii CBS 4417
- Naumovozyma dairensis CBS 421
- Naumovozyma castellii CBS 4309
- Eremothecium cymbalariae DBVPG\_7215
- Eremothecium gossypii
- Tuber melanosporum
- Zymoseptoria tritici
- Phaeosphaeria nodorum
- Leptosphaeria maculans
- Pyrenophora tritici repens Pt 1C BFP
- Pyrenophora teres f. teres 0 1
- Botryotinia fuckeliana
- Sclerotinia sclerotiorum
- Verticillium albo atrum VaMs.102
- Fusarium oxysporum
- Hypocrea virens
- Hypocrea jecorina
- Nectria haematococca
- Gibberella moniliformis
- Gibberella zeae PH 1
- Gibberella zeae
- Gaeumannomyces graminis
- Magnaporthe grisea
- Magnaporthe poae
- Magnaporthe oryzae
- Podospira anserina S mat
- Neurospora crassa
- Sordaria macrospora k hell
- Myceliophthora thermophila ATCC 42464
- Chaetomium globosum CBS 148.51
- Thielavia terrestris NRRL 8126
- Uncinocarpus reesii 1704
- Ajellomyces capsulatus Nam1
- Ajellomyces dermatitidis SLH14081
- Paracoccidioides sp. lutzi Fb01
- Coccidioides posadasii C735 delta SOWgp
- Coccidioides immitis RS
- Trichophyton rubrum CBS 118892
- Trichophyton verrucosum HKI 0517
- Arthroderma benhamiae CBS 112371
- Arthroderma gypseum CBS 118893
- Arthroderma otae CBS 113480
- Talaromyces stipitatus ATCC 10500
- Neosartorya fischeri
- Emericella nidulans
- Penicillium chrysogenum Wisconsin 54 1255
- Penicillium marneffei ATCC 18224
- Aspergillus clavatus
- Aspergillus flavus
- Aspergillus oryzae
- Aspergillus niger
- Aspergillus fumigatus
- Aspergillus terreus
- Monosiga brevicollis MX1
- Amphimedon queenslandica
- Trichoplax adhaerens
- Nematostella vectensis
- Hydra magnipapillata
- Schistosoma mansoni
- Trichinella spiralis
- Pristionchus pacificus
- Caenorhabditis brenneri
- Caenorhabditis briggsae
- Caenorhabditis remanei
- Caenorhabditis japonica
- Caenorhabditis elegans
- Ixodes scapularis
- Daphnia pulex
- Pediculus humanus
- Acyrtosiphon pisum
- Tribolium castaneum
- Nasonia vitripennis
- Apis mellifera
- Atta cephalotes
- Bombyx mori
- Danaus plexippus
- Heliconius melpomene
- Culex quinquefasciatus
- Aedes aegypti
- Anopheles gambiae
- Anopheles darlingi
- Drosophila virilis
- Drosophila grimshawi
- Drosophila willistoni
- Drosophila pseudoobscura
- Drosophila ananassae
- Drosophila melanogaster
- Drosophila yakuba
- Strongylocentrotus purpuratus
- Branchiostoma floridae
- Ciona intestinalis
- Ciona savignyi
- Petromyzon marinus
- Danio rerio
- Gadus morhua
- Oreochromis niloticus
- Takifugu rubripes
- Tetraodon nigroviridis
- Gasterosteus aculeatus
- Xiphophorus maculatus
- Oryzias latipes
- Latimeria chalumnae
- Xenopus (Silurana) tropicalis
- Pelodiscus sinensis
- Anolis carolinensis
- Taeniopygia guttata
- Gallus gallus
- Meleagris gallopavo
- Ornithorhynchus anatinus
- Monodelphis domestica
- Sarcophilus harrisii
- Macropus eugenii
- Dasyurus novemcinctus
- Loxodonta africana
- Echinops telillari
- Procavia capensis
- Myotis lucifugus
- Pteropus vampyrus
- Sus scrofa
- Tursiops truncatus
- Bos taurus
- Equus caballus
- Felis catus
- Canis lupus familiaris
- Mustela putorius furo
- Alluropoda melanoleuca
- Cryptolestes cuniculus
- Cavia porcellus
- Ictidomys tridecemlineatus
- Dipodomys ordii
- Rattus norvegicus
- Mus musculus
- Tupaia belangeri
- Otolemur garnettii
- Microcebus murinus
- Tarsius syrichta
- Callithrix jacchus
- Macaca mulatta
- Nomascus leucogenys
- Pongo abelii
- Gorilla gorilla
- Pan troglodytes
- Homo sapiens
- Perkinsus marinus ATCC 50983
- Tetrahymena thermophila
- Paramecium tetraurelia strain d4 2
- Neospora caninum Liverpool
- Toxoplasma gondii
- Cryptosporidium muris RN66
- Cryptosporidium parvum Iowa II
- Cryptosporidium hominis TU502
- Theileria annulata strain Ankara
- Theileria parva strain Muguga
- Plasmodium falciparum
- Plasmodium knowlesi
- Plasmodium vivax
- Plasmodium chabaudi
- Plasmodium yoelii yoelii 17XNL
- Plasmodium berghei
- Phaeodactylum tricornutum
- Thalassiosira pseudonana
- Pythium ultimum
- Albugo liliaceae
- Hyaloperonospora arabidopsidis
- Phytophthora ramorum
- Phytophthora infestans
- Phytophthora sojae
- Trypanosoma brucei
- Trypanosoma cruzi strain CL Brener
- Leishmania braziliensis MHOM BR 75 M2904
- Leishmania mexicana MHOM GT 2001 U1103
- Leishmania major
- Leishmania donovani
- Leishmania infantum JPCM5
- Entamoeba histolytica
- Entamoeba dispar SAW760
- Dicystostellum discoideum
- Dicystostellum purpureum
- Trichomonas vaginalis G3
- Trichomonas vaginalis
- Naegleria gruberi
- Giardia lamblia ATCC 50803

- OG presence
- OG absence
- Inferred root

Dscore = 1  
 Pvalue = 4.32e-07  
 AdjPvalue = 5.14e-05

- Arabis thaliana
- Arabis lyrata
- Brassica rapa
- Glycine max
- Populus trichocarpa
- Vitis vinifera
- Solanum tuberosum
- Solanum lycopersicum
- Oryza sativa Indica Group
- Oryza sativa Japonica Group
- Oryza brachyantha
- Oryza glaberrima
- Hordeum vulgare
- Brachypodium distachyon
- Zea mays
- Sorghum bicolor
- Setaria italica
- Musa acuminata
- Selaginella moellendorffii
- Physcomitrella patens
- Ostreococcus tauri
- Ostreococcus lucimarinus CCE9901
- Chlamydomonas reinhardtii
- Cyanidioschyzon merolae
- Encephalitozoon hellem ATCC 50504
- Encephalitozoon intestinalis ATCC 50506
- Encephalitozoon cuniculi GB M1
- Puccinia graminis
- Puccinia triticina
- Ustilago maydis
- Melassezia globosa CBS 7966
- Cryptococcus gattii WM276
- Cryptococcus neoformans var. neoformans JEC21
- Cryptococcus neoformans var. neoformans B 3501A
- Phanerochaete chrysosporium
- Schizophyllum commune H4 B
- Coprinopsis cinerea okayama7\_130
- Laccaria bicolor S238N H82
- Schizosaccharomyces japonicus yFS275
- Schizosaccharomyces pombe
- Clavospora lusitanae ATCC 42720
- Yarrowia lipolytica
- Candida tropicalis MYA 3404
- Candida dubliniensis CD36
- Lodderomyces elongisporus NRRL YB 4239
- Scheffersomyces stipitis CBS 6054
- Meyerozyma guilliermondii ATCC 6260
- Pichia guilliermondii
- Lachancea thermotolerans
- Kluyveromyces fragilis NRRL Y 1140
- Saccharomyces cerevisiae
- Zygosaccharomyces rouxii
- Komagataella pastoris GS115
- Vanderwaltozyma polyspora DSM 70294
- Torulopsis delbrueckii
- Candida glabrata CBS 138
- Tetrapispora phaffii CBS 4417
- Naumovozyma dairensis CBS 421
- Naumovozyma castellii CBS 4309
- Eremothecium cymbalariae DBVPG\_7215
- Eremothecium gossypii
- Tuber melanosporum
- Zymoseptoria tritici
- Phaeosphaeria nodorum
- Leptosphaeria maculans
- Pyrenophora tritici repens Pt 1C BFP
- Pyrenophora teres f. teres 0 1
- Botryotinia fuckeliana
- Sclerotinia sclerotiorum
- Verticillium albo atrum VaMs.102
- Fusarium oxysporum
- Hypocrea virens
- Hypocrea jecorina
- Nectria haematococca
- Gibberella moniliformis
- Gibberella zeae PH 1
- Gibberella zeae
- Gaeumannomyces graminis
- Magnaporthe grisea
- Magnaporthe poae
- Magnaporthe oryzae
- Podospira anserina S mat
- Neurospora crassa
- Sordaria macrospora k hell
- Myceliophthora thermophila ATCC 42464
- Chaetomium globosum CBS 148.51
- Thielavia terrestris NRRL 8126
- Uncinocarpus reesii 1704
- Ajellomyces capsulatus Nam1
- Ajellomyces dermatitidis SLH14081
- Paracoccidioides sp. lutzi Fb01
- Coccidioides posadasii C735 delta SOWgp
- Coccidioides immitis RS
- Trichophyton rubrum CBS 118892
- Trichophyton verrucosum HKI 0517
- Arthroderma benhamiae CBS 112371
- Arthroderma gypseum CBS 118893
- Arthroderma otae CBS 113480
- Talaromyces stipitatus ATCC 10500
- Neosartorya fischeri
- Emericella nidulans
- Penicillium chrysogenum Wisconsin 54 1255
- Penicillium marneffei ATCC 18224
- Aspergillus clavatus
- Aspergillus flavus
- Aspergillus oryzae
- Aspergillus niger
- Aspergillus fumigatus
- Aspergillus terreus
- Monosiga brevicollis MX1
- Amphimedon queenslandica
- Trichoplax adhaerens
- Nematostella vectensis
- Hydra magnipapillata
- Schistosoma mansoni
- Trichinella spiralis
- Pristionchus pacificus
- Caenorhabditis brenneri
- Caenorhabditis briggsae
- Caenorhabditis remanei
- Caenorhabditis japonica
- Caenorhabditis elegans
- Ixodes scapularis
- Daphnia pulex
- Pediculus humanus
- Acyrtosiphon pisum
- Tribolium castaneum
- Nasonia vitripennis
- Apis mellifera
- Atta cephalotes
- Bombyx mori
- Danaus plexippus
- Heliconius melpomene
- Culex quinquefasciatus
- Aedes aegypti
- Anopheles gambiae
- Anopheles darlingi
- Drosophila virilis
- Drosophila grimshawi
- Drosophila willistoni
- Drosophila pseudoobscura
- Drosophila ananassae
- Drosophila melanogaster
- Drosophila yakuba
- Strongylocentrotus purpuratus
- Branchiostoma floridae
- Ciona intestinalis
- Ciona savignyi
- Petromyzon marinus
- Danio rerio
- Gadus morhua
- Oreochromis niloticus
- Takifugu rubripes
- Tetraodon nigroviridis
- Gasterosteus aculeatus
- Xiphophorus maculatus
- Oryzias latipes
- Latimeria chalumnae
- Xenopus (Silurana) tropicalis
- Pelodiscus sinensis
- Anolis carolinensis
- Taeniopygia guttata
- Gallus gallus
- Meleagris gallopavo
- Ornithorhynchus anatinus
- Monodelphis domestica
- Sarcophilus harrisii
- Macropus eugenii
- Dasyurus novemcinctus
- Loxodonta africana
- Echinops telillari
- Procavia capensis
- Myotis lucifugus
- Pteropus vampyrus
- Sus scrofa
- Tursiops truncatus
- Bos taurus
- Equus caballus
- Felis catus
- Canis lupus familiaris
- Mustela putorius furo
- Alluropoda melanoleuca
- Cryptolestes cuniculus
- Cavia porcellus
- Ictidomys tridecemlineatus
- Dipodomys ordii
- Rattus norvegicus
- Mus musculus
- Tupaia belangeri
- Otolomus garretti
- Microcebus murinus
- Tarsius syrichta
- Callithrix jacchus
- Macaca mulatta
- Nomascus leucogenys
- Pongo abelii
- Gorilla gorilla
- Pan troglodytes
- Homo sapiens
- Perkinsus marinus ATCC 50983
- Tetrahymena thermophila
- Paramecium tetraurelia strain d4 2
- Neospora caninum Liverpool
- Toxoplasma gondii
- Cryptosporidium muris RN66
- Cryptosporidium parvum Iowa II
- Cryptosporidium hominis TU502
- Theileria annulata strain Ankara
- Theileria parva strain Muguga
- Plasmodium falciparum
- Plasmodium knowlesi
- Plasmodium vivax
- Plasmodium chabaudi
- Plasmodium yoelii yoelii 17XNL
- Plasmodium berghei
- Phaeodactylum tricornutum
- Thalassiosira pseudonana
- Pythium ultimum
- Albugo liliaceae
- Hyaloperonospora arabidopsidis
- Phytophthora ramorum
- Phytophthora infestans
- Phytophthora sojae
- Trypanosoma brucei
- Trypanosoma cruzi strain CL Brener
- Leishmania braziliensis MHOM BR 75 M2904
- Leishmania mexicana MHOM GT 2001 U1103
- Leishmania major
- Leishmania donovani
- Leishmania infantum JPCM5
- Entamoeba histolytica
- Entamoeba dispar SAW760
- Dicystostellum discoideum
- Dicystostellum purpureum
- Trichomonas vaginalis G3
- Trichomonas vaginalis
- Naegleria gruberi
- Giardia lamblia ATCC 50803

- OG presence
- OG absence
- Inferred root

Dscore = 0.917  
Pvalue = 1.52e-06  
AdjPvalue = 1.80e-04

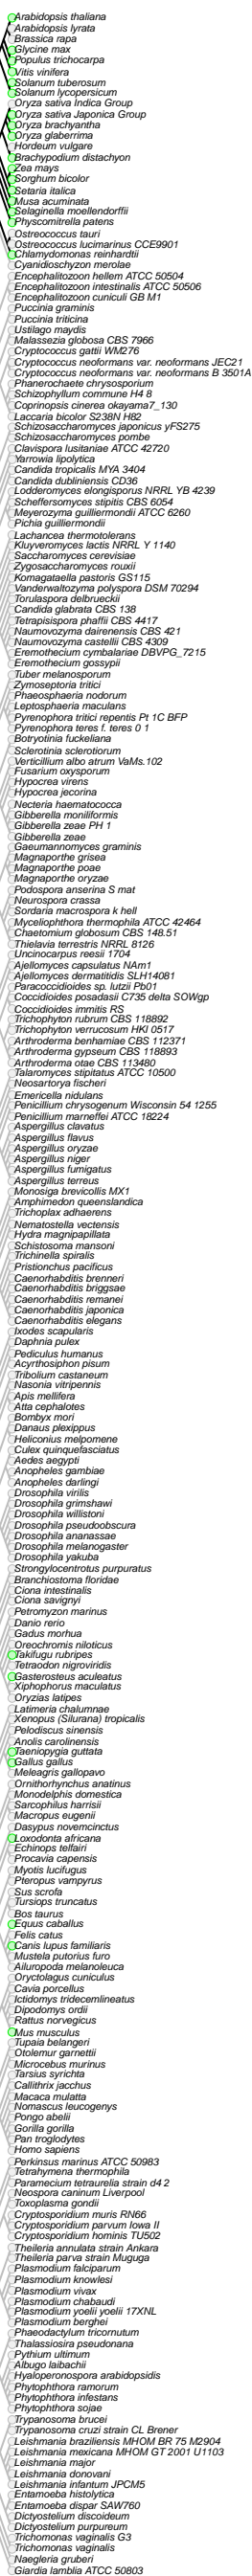

- OG presence
- OG absence
- ◆ Inferred root

Dscore = 0.73

Pvalue = 1.55e-03

AdjPvalue = 1.85e-01

Giardia lamblia ATCC 50803

- Arabis thaliana
- Arabidopsis lyrata
- Brassica rapa
- Glycine max
- Populus trichocarpa
- Vitis vinifera
- Solanum tuberosum
- Solanum lycopersicum
- Oryza sativa Indica Group
- Oryza sativa Japonica Group
- Oryza brachyantha
- Oryza glaberrima
- Hordeum vulgare
- Brachypodium distachyon
- Zea mays
- Sorghum bicolor
- Setaria italica
- Musa acuminata
- Salvinella moellendorffii
- Physcomitrella patens
- Ostreococcus tauri
- Ostreococcus lucimarinus CCE9901
- Chlamydomonas reinhardtii
- Cyanidioschyzon merolae
- Encephalitozoon hellem ATCC 50504
- Encephalitozoon intestinalis ATCC 50506
- Encephalitozoon cuniculi GB M1
- Puccinia graminis
- Puccinia triticina
- Ustilago maydis
- Melassezia globosa CBS 7966
- Cryptococcus gattii WM276
- Cryptococcus neoformans var. neoformans JEC21
- Cryptococcus neoformans var. neoformans B 3501A
- Phanerochaete chrysosporium
- Schizophyllum commune H4 B
- Coprinopsis cinerea okayama7\_130
- Laccaria bicolor S238N H82
- Schizosaccharomyces japonicus yFS275
- Schizosaccharomyces pombe
- Clavospora lusitanae ATCC 42720
- Yarrowia lipolytica
- Candida tropicalis MYA 3404
- Candida dubliniensis CD36
- Lodderomyces elongisporus NRRL YB 4239
- Scheffersomyces stipitis CBS 6054
- Meyerozyma guilliermondii ATCC 6260
- Pichia guilliermondii
- Lachancea thermotolerans
- Kluyveromyces fragilis NRRL Y 1140
- Saccharomyces cerevisiae
- Zygosaccharomyces rouxii
- Komagataella pastoris GS115
- Vanderwaltozyma polyspora DSM 70294
- Torulopsis delbrueckii
- Candida glabrata CBS 138
- Tetrapispora phaffii CBS 4417
- Naumovozyma dairenensis CBS 421
- Naumovozyma castellii CBS 4309
- Eremothecium cymbalariae DBVPG\_7215
- Eremothecium gossypii
- Tuber melanosporum
- Zymoseptoria tritici
- Phaeosphaeria nodorum
- Leptosphaeria maculans
- Pyrenophora tritici repens Pt 1C BFP
- Pyrenophora teres f. teres 0 1
- Botryotinia fuckeliana
- Sclerotinia sclerotiorum
- Verticillium albo atrum VaMs.102
- Fusarium oxysporum
- Hypocrea virens
- Hypocrea jecorina
- Nectria haematococca
- Gibberella moniliformis
- Gibberella zeae PH 1
- Gibberella zeae
- Gaeumannomyces graminis
- Magnaporthe grisea
- Magnaporthe poae
- Magnaporthe oryzae
- Podospira anserina S mat
- Neurospora crassa
- Sordaria macrospora k hell
- Myceliophthora thermophila ATCC 42464
- Chaetomium globosum CBS 148.51
- Thielavia terrestris NRRL 8126
- Uncinocarpus reesii 1704
- Ajellomyces capsulatus Nam1
- Ajellomyces dermatitidis SLH14081
- Paracoccidioides sp. lutzi Fb01
- Coccidioides posadasii C735 delta SOWgp
- Coccidioides immitis RS
- Trichophyton rubrum CBS 118892
- Trichophyton verrucosum HKI 0517
- Arthroderma benhamiae CBS 112371
- Arthroderma gypseum CBS 118893
- Arthroderma otae CBS 113480
- Talaromyces stipitatus ATCC 10500
- Neosartorya fischeri
- Emericella nidulans
- Penicillium chrysogenum Wisconsin 54 1255
- Penicillium marneffei ATCC 18224
- Aspergillus clavatus
- Aspergillus flavus
- Aspergillus oryzae
- Aspergillus niger
- Aspergillus fumigatus
- Aspergillus terreus
- Monosiga brevicollis MX1
- Amphimedon queenslandica
- Trichoplax adhaerens
- Nematostella vectensis
- Hydra magnipapillata
- Schistosoma mansoni
- Trichinella spiralis
- Pristionchus pacificus
- Caenorhabditis breneri
- Caenorhabditis briggsae
- Caenorhabditis remanei
- Caenorhabditis japonica
- Caenorhabditis elegans
- Ixodes scapularis
- Daphnia pulex
- Pediculus humanus
- Acyrtosiphon pisum
- Tribolium castaneum
- Nasonia vitripennis
- Apis mellifera
- Atta cephalotes
- Bombyx mori
- Danaus plexippus
- Heliconia melpomene
- Culex quinquefasciatus
- Aedes aegypti
- Anopheles gambiae
- Anopheles darlingi
- Drosophila virilis
- Drosophila grimshawi
- Drosophila willistoni
- Drosophila pseudoobscura
- Drosophila ananassae
- Drosophila melanogaster
- Drosophila yakuba
- Strongylocentrotus purpuratus
- Branchiostoma floridae
- Ciona intestinalis
- Ciona savignyi
- Petromyzon marinus
- Danio rerio
- Gadus morhua
- Oreochromis niloticus
- Takifugu rubripes
- Tetraodon nigroviridis
- Gasterosteus aculeatus
- Xiphophorus maculatus
- Oryzias latipes
- Latimeria chalumnae
- Xenopus (Silurana) tropicalis
- Pelodiscus sinensis
- Anolis carolinensis
- Taeniopygia guttata
- Gallus gallus
- Meleagris gallopavo
- Ornithorhynchus anatinus
- Monodelphis domestica
- Sarcophilus harrisii
- Macropus eugenii
- Dasyurus novemcinctus
- Loxodonta africana
- Echinops telillari
- Procavia capensis
- Myotis lucifugus
- Pteropus vampyrus
- Sus scrofa
- Tursiops truncatus
- Bos taurus
- Equus caballus
- Felis catus
- Canis lupus familiaris
- Mustela putorius furo
- Alluropoda melanoleuca
- Cryptolestes cuniculus
- Cavia porcellus
- Ictidomys tridecemlineatus
- Dipodomys ordii
- Rattus norvegicus
- Mus musculus
- Tupaia belangeri
- Otolomus garretti
- Microcebus murinus
- Tarsius syrichta
- Callithrix jacchus
- Macaca mulatta
- Nomascus leucogenys
- Pongo abelii
- Gorilla gorilla
- Pan troglodytes
- Homo sapiens
- Perkinsus marinus ATCC 50983
- Tetrahymena thermophila
- Paramecium tetraurelia strain d4 2
- Neospora caninum Liverpool
- Toxoplasma gondii
- Cryptosporidium muris RN66
- Cryptosporidium parvum Iowa II
- Cryptosporidium hominis TU502
- Theileria annulata strain Ankara
- Theileria parva strain Muguga
- Plasmodium falciparum
- Plasmodium knowlesi
- Plasmodium vivax
- Plasmodium chabaudi
- Plasmodium yoelii yoelii 17XNL
- Plasmodium berghei
- Phaeodactylum tricornutum
- Thalassiosira pseudonana
- Pythium ultimum
- Albugo liliaceae
- Hyaloperonospora arabidopsidis
- Phytophthora ramorum
- Phytophthora infestans
- Phytophthora sojae
- Trypanosoma brucei
- Trypanosoma cruzi strain CL Brener
- Leishmania braziliensis MHOM BR 75 M2904
- Leishmania mexicana MHOM GT 2001 U1103
- Leishmania major
- Leishmania donovani
- Leishmania infantum JPCM5
- Entamoeba histolytica
- Entamoeba dispar SAW760
- Dicystostellum discoideum
- Dicystostellum purpureum
- Trichomonas vaginalis G3
- Trichomonas vaginalis
- Naegleria gruberi
- Giardia lamblia ATCC 50803

- OG presence
- OG absence
- Inferred root

Dscore = 0.915  
Pvalue = 5.81e-05  
AdjPvalue = 6.91e-03

- Arabis thaliana
- Arabidopsis lyrata
- Brassica rapa
- Glycine max
- Populus trichocarpa
- Vitis vinifera
- Solanum tuberosum
- Solanum lycopersicum
- Oryza sativa Indica Group
- Oryza sativa Japonica Group
- Oryza brachyantha
- Oryza glaberrima
- Hordeum vulgare
- Brachypodium distachyon
- Zea mays
- Sorghum bicolor
- Setaria italica
- Musa acuminata
- Selaginella moellendorffii
- Physcomitrella patens
- Ostreococcus tauri
- Ostreococcus lucimarinus CCE9901
- Chlamydomonas reinhardtii
- Cyanidioschyzon merolae
- Encephalitozoon hellem ATCC 50504
- Encephalitozoon intestinalis ATCC 50506
- Encephalitozoon cuniculi GB M1
- Puccinia graminis
- Puccinia triticina
- Ustilago maydis
- Melassezia globosa CBS 7966
- Cryptococcus gattii WM276
- Cryptococcus neoformans var. neoformans JEC21
- Cryptococcus neoformans var. neoformans B 3501A
- Phanerochaete chrysosporium
- Schizophyllum commune H4 B
- Coprinopsis cinerea okayama7\_130
- Laccaria bicolor S238N H82
- Schizosaccharomyces japonicus yFS275
- Schizosaccharomyces pombe
- Clavospora lusitanae ATCC 42720
- Yarrowia lipolytica
- Candida tropicalis MYA 3404
- Candida dubliniensis CD36
- Lodderomyces elongisporus NRRL YB 4239
- Scheffersomyces stipitis CBS 6054
- Meyerozyma guilliermondii ATCC 6260
- Pichia guilliermondii
- Lachancea thermotolerans
- Kluyveromyces fragilis NRRL Y 1140
- Saccharomyces cerevisiae
- Zygosaccharomyces rouxii
- Komagataella pastoris GS115
- Vanderwaltozyma polyspora DSM 70294
- Torulopsis delbrueckii
- Candida glabrata CBS 138
- Tetrapispora phaffii CBS 4417
- Naumovozyma dairensis CBS 421
- Naumovozyma castellii CBS 4309
- Eremothecium cymbalariae DBVPG\_7215
- Eremothecium gossypii
- Tuber melanosporum
- Zymoseptoria tritici
- Phaeosphaeria nodorum
- Leptosphaeria maculans
- Pyrenophora tritici repens Pt 1C BFP
- Pyrenophora teres f. teres 0 1
- Botryotinia fuckeliana
- Sclerotinia sclerotiorum
- Verticillium albo atrum VaMs.102
- Fusarium oxysporum
- Hypocrea virens
- Hypocrea jecorina
- Nectria haematococca
- Gibberella moniliformis
- Gibberella zeae PH 1
- Gibberella zeae
- Gaeumannomyces graminis
- Magnaporthe grisea
- Magnaporthe poae
- Magnaporthe oryzae
- Podospira anserina S mat
- Neurospora crassa
- Sordaria macrospora k hell
- Myceliophthora thermophila ATCC 42464
- Chaetomium globosum CBS 148.51
- Thielavia terrestris NRRL 8126
- Uncinocarpus reesii 1704
- Ajellomyces capsulatus Nam1
- Ajellomyces dermatitidis SLH14081
- Paracoccidioides sp. lutzi Fb01
- Coccidioides posadasii C735 delta SOWgp
- Coccidioides immitis RS
- Trichophyton rubrum CBS 118892
- Trichophyton verrucosum HKI 0517
- Arthroderma benhamiae CBS 112371
- Arthroderma gypseum CBS 118893
- Arthroderma otae CBS 113480
- Talaromyces stipitatus ATCC 10500
- Neosartorya fischeri
- Emericella nidulans
- Penicillium chrysogenum Wisconsin 54 1255
- Penicillium marneffei ATCC 18224
- Aspergillus clavatus
- Aspergillus flavus
- Aspergillus oryzae
- Aspergillus niger
- Aspergillus fumigatus
- Aspergillus terreus
- Monosiga brevicollis MX1
- Amphimedon queenslandica
- Trichoplax adhaerens
- Nematostella vectensis
- Hydra magnipapillata
- Schistosoma mansoni
- Trichinella spiralis
- Pristionchus pacificus
- Caenorhabditis breneri
- Caenorhabditis briggsae
- Caenorhabditis remanei
- Caenorhabditis japonica
- Caenorhabditis elegans
- Ixodes scapularis
- Daphnia pulex
- Pediculus humanus
- Acyrtosiphon pisum
- Tribolium castaneum
- Nasonia vitripennis
- Apis mellifera
- Atta cephalotes
- Bombyx mori
- Danaus plexippus
- Heliconia melpomene
- Culex quinquefasciatus
- Aedes aegypti
- Anopheles gambiae
- Anopheles darlingi
- Drosophila virilis
- Drosophila grimshawi
- Drosophila willistoni
- Drosophila pseudoobscura
- Drosophila ananassae
- Drosophila melanogaster
- Drosophila yakuba
- Strongylocentrotus purpuratus
- Branchiostoma floridae
- Ciona intestinalis
- Ciona savignyi
- Petromyzon marinus
- Danio rerio
- Gadus morhua
- Oreochromis niloticus
- Takifugu rubripes
- Tetraodon nigroviridis
- Gasterosteus aculeatus
- Xiphophorus maculatus
- Oryzias latipes
- Latimeria chalumnae
- Xenopus (Silurana) tropicalis
- Pelodiscus sinensis
- Anolis carolinensis
- Taeniopygia guttata
- Gallus gallus
- Meleagris gallopavo
- Ornithorhynchus anatinus
- Monodelphis domestica
- Sarcophilus harrisii
- Macropus eugenii
- Dasyurus novemcinctus
- Loxodonta africana
- Echinops telfairii
- Procavia capensis
- Myotis lucifugus
- Pteropus vampyrus
- Sus scrofa
- Tursiops truncatus
- Bos taurus
- Equus caballus
- Felis catus
- Canis lupus familiaris
- Mustela putorius furo
- Alluropoda melanoleuca
- Cryptolestes cuniculus
- Cavia porcellus
- Ictidomys tridecemlineatus
- Dipodomys ordii
- Rattus norvegicus
- Mus musculus
- Tupaia belangeri
- Otolomus garrettii
- Microcebus murinus
- Tarsius syrichta
- Callithrix jacchus
- Macaca mulatta
- Nomascus leucogenys
- Pongo abelii
- Gorilla gorilla
- Pan troglodytes
- Homo sapiens
- Perkinsus marinus ATCC 50983
- Tetrahymena thermophila
- Paramecium tetraurelia strain d4 2
- Neospora caninum Liverpool
- Toxoplasma gondii
- Cryptosporidium muris RN66
- Cryptosporidium parvum Iowa II
- Cryptosporidium hominis TU502
- Theileria annulata strain Ankara
- Theileria parva strain Muguga
- Plasmodium falciparum
- Plasmodium knowlesi
- Plasmodium vivax
- Plasmodium chabaudi
- Plasmodium yoelii yoelii 17XNL
- Plasmodium berghei
- Phaeodactylum tricornutum
- Thalassiosira pseudonana
- Pythium ultimum
- Albugo liliaceae
- Hyaloperonospora arabidopsidis
- Phytophthora ramorum
- Phytophthora infestans
- Phytophthora sojae
- Trypanosoma brucei
- Trypanosoma cruzi strain CL Brener
- Leishmania braziliensis MHOM BR 75 M2904
- Leishmania mexicana MHOM GT 2001 U1103
- Leishmania major
- Leishmania donovani
- Leishmania infantum JPCM5
- Entamoeba histolytica
- Entamoeba dispar SAW760
- Dicystostellum discoideum
- Dicystostellum purpureum
- Trichomonas vaginalis G3
- Trichomonas vaginalis
- Naegleria gruberi
- Giardia lamblia ATCC 50803

- OG presence
- OG absence
- Inferred root

Dscore = 1  
Pvalue = 9.15e-06  
AdjPvalue = 1.09e-03

- Arabis thaliana
- Arabis lyrata
- Brassica rapa
- Glycine max
- Populus trichocarpa
- Vitis vinifera
- Solanum tuberosum
- Solanum lycopersicum
- Oryza sativa Indica Group
- Oryza sativa Japonica Group
- Oryza brachyantha
- Oryza glaberrima
- Hordeum vulgare
- Brachypodium distachyon
- Zea mays
- Sorghum bicolor
- Setaria italica
- Musa acuminata
- Selaginella moellendorffii
- Physcomitrella patens
- Ostreococcus tauri
- Ostreococcus lucimarinus CCE9901
- Chlamydomonas reinhardtii
- Cyanidioschyzon merolae
- Encephalitozoon hellem ATCC 50504
- Encephalitozoon intestinalis ATCC 50506
- Encephalitozoon cuniculi GB M1
- Puccinia graminis
- Puccinia triticina
- Ustilago maydis
- Malassezia globosa CBS 7966
- Cryptococcus gattii WM276
- Cryptococcus neoformans var. neoformans JEC21
- Cryptococcus neoformans var. neoformans B 3501A
- Phanerochaete chrysosporium
- Schizophyllum commune H4 B
- Coprinopsis cinerea okayama7\_130
- Laccaria bicolor S238N H82
- Schizosaccharomyces japonicus yFS275
- Schizosaccharomyces pombe
- Clavospora lusitanae ATCC 42720
- Yarrowia lipolytica
- Candida tropicalis MYA 3404
- Candida dubliniensis CD36
- Lodderomyces elongisporus NRRL YB 4239
- Scheffersomyces stipitis CBS 6054
- Meyerozyma guilliermondii ATCC 6260
- Pichia guilliermondii
- Lachancea thermotolerans
- Kluyveromyces fragilis NRRL Y 1140
- Saccharomyces cerevisiae
- Zygosaccharomyces rouxii
- Komagataella pastoris GS115
- Vanderwaltozyma polyspora DSM 70294
- Torulopsis delbrueckii
- Candida glabrata CBS 138
- Tetrapispora phaffii CBS 4417
- Naumovozyma dairensis CBS 421
- Naumovozyma castellii CBS 4309
- Eremothecium cymbalariae DBVPG\_7215
- Eremothecium gossypii
- Tuber melanosporum
- Zymoseptoria tritici
- Phaeosphaeria nodorum
- Leptosphaeria maculans
- Pyrenophora tritici repens Pt 1C BFP
- Pyrenophora teres f. teres 0 1
- Botryotinia fuckeliana
- Sclerotinia sclerotiorum
- Verticillium albo atrum VaMs.102
- Fusarium oxysporum
- Hypocrea virens
- Hypocrea jecorina
- Nectria haematococca
- Gibberella moniliformis
- Gibberella zeae PH 1
- Gibberella zeae
- Gaeumannomyces graminis
- Magnaporthe grisea
- Magnaporthe poae
- Magnaporthe oryzae
- Podospira anserina S mat
- Neurospora crassa
- Sordaria macrospora k hell
- Myceliophthora thermophila ATCC 42464
- Chaetomium globosum CBS 148.51
- Thielavia terrestris NRRL 8126
- Uncinocarpus reesii 1704
- Ajellomyces capsulatus Nam1
- Ajellomyces dermatitidis SLH14081
- Paracoccidioides sp. lutzi Fb01
- Coccidioides posadasii C735 delta SOWgp
- Coccidioides immitis RS
- Trichophyton rubrum CBS 118892
- Trichophyton verrucosum HKI 0517
- Arthroderma benhamiae CBS 112371
- Arthroderma gypseum CBS 118893
- Arthroderma otae CBS 113480
- Talaromyces stipitatus ATCC 10500
- Neosartorya fischeri
- Emericella nidulans
- Penicillium chrysogenum Wisconsin 54 1255
- Penicillium marneffei ATCC 18224
- Aspergillus clavatus
- Aspergillus flavus
- Aspergillus oryzae
- Aspergillus niger
- Aspergillus fumigatus
- Aspergillus terreus
- Monosiga brevicollis MX1
- Amphimedon queenslandica
- Trichoplax adhaerens
- Nematostella vectensis
- Hydra magnipapillata
- Schistosoma mansoni
- Trichiella spiralis
- Pristionchus pacificus
- Caenorhabditis brenneri
- Caenorhabditis briggsae
- Caenorhabditis remanei
- Caenorhabditis japonica
- Caenorhabditis elegans
- Ixodes scapularis
- Daphnia pulex
- Pediculus humanus
- Acyrtosiphon pisum
- Tribolium castaneum
- Nasonia vitripennis
- Apis mellifera
- Atta cephalotes
- Bombyx mori
- Danaus plexippus
- Heliconia melpomene
- Culex quinquefasciatus
- Aedes aegypti
- Anopheles gambiae
- Anopheles darlingi
- Drosophila virilis
- Drosophila grimshawi
- Drosophila willistoni
- Drosophila pseudoobscura
- Drosophila ananassae
- Drosophila melanogaster
- Drosophila yakuba
- Strongylocentrotus purpuratus
- Branchiostoma floridae
- Ciona intestinalis
- Ciona savignyi
- Petromyzon marinus
- Danio rerio
- Gadus morhua
- Oreochromis niloticus
- Takifugu rubripes
- Tetraodon nigroviridis
- Gasterosteus aculeatus
- Xiphophorus maculatus
- Oryzias latipes
- Latimeria chalumnae
- Xenopus (Silurana) tropicalis
- Pelodiscus sinensis
- Anolis carolinensis
- Taeniopygia guttata
- Gallus gallus
- Meleagris gallopavo
- Ornithorhynchus anatinus
- Monodelphis domestica
- Sarcophilus harrisii
- Macropus eugenii
- Dasyurus novemcinctus
- Loxodonta africana
- Echinosorex tillarii
- Procavia capensis
- Myotis lucifugus
- Pteropus vampyrus
- Sus scrofa
- Tursiops truncatus
- Bos taurus
- Equus caballus
- Felis catus
- Canis lupus familiaris
- Mustela putorius furo
- Alluropoda melanoleuca
- Cryptolestes cuniculus
- Cavia porcellus
- Ictidomys tridecemlineatus
- Dipodomys ordii
- Rattus norvegicus
- Mus musculus
- Tupaia belangeri
- Otolomus garretti
- Microcebus murinus
- Tarsius syrichta
- Callithrix jacchus
- Macaca mulatta
- Nomascus leucogenys
- Pongo abelii
- Gorilla gorilla
- Pan troglodytes
- Homo sapiens
- Perkinsus marinus ATCC 50983
- Tetrahymena thermophila
- Paramecium tetraurelia strain d4 2
- Neospora caninum Liverpool
- Toxoplasma gondii
- Cryptosporidium muris RN66
- Cryptosporidium parvum Iowa II
- Cryptosporidium hominis TU502
- Theileria annulata strain Ankara
- Theileria parva strain Muguga
- Plasmodium falciparum
- Plasmodium knowlesi
- Plasmodium vivax
- Plasmodium chabaudi
- Plasmodium yoelii yoelii 17XNL
- Plasmodium berghei
- Phaeodactylum tricornutum
- Thalassiosira pseudonana
- Pythium ultimum
- Albugo liliaceae
- Hyaloperonospora arabidopsidis
- Phytophthora ramorum
- Phytophthora infestans
- Phytophthora sojae
- Trypanosoma brucei
- Trypanosoma cruzi strain CL Brener
- Leishmania braziliensis MHOM BR 75 M2904
- Leishmania mexicana MHOM GT 2001 U1103
- Leishmania major
- Leishmania donovani
- Leishmania infantum JPCM5
- Entamoeba histolytica
- Entamoeba dispar SAW760
- Dicystostellum discoideum
- Dicystostellum purpureum
- Trichomonas vaginalis G3
- Trichomonas vaginalis
- Naegleria gruberi
- Giardia lamblia ATCC 50803

- OG presence
- OG absence
- Inferred root

Dscore = 0.667  
Pvalue = 4.24e-04  
AdjPvalue = 5.04e-02

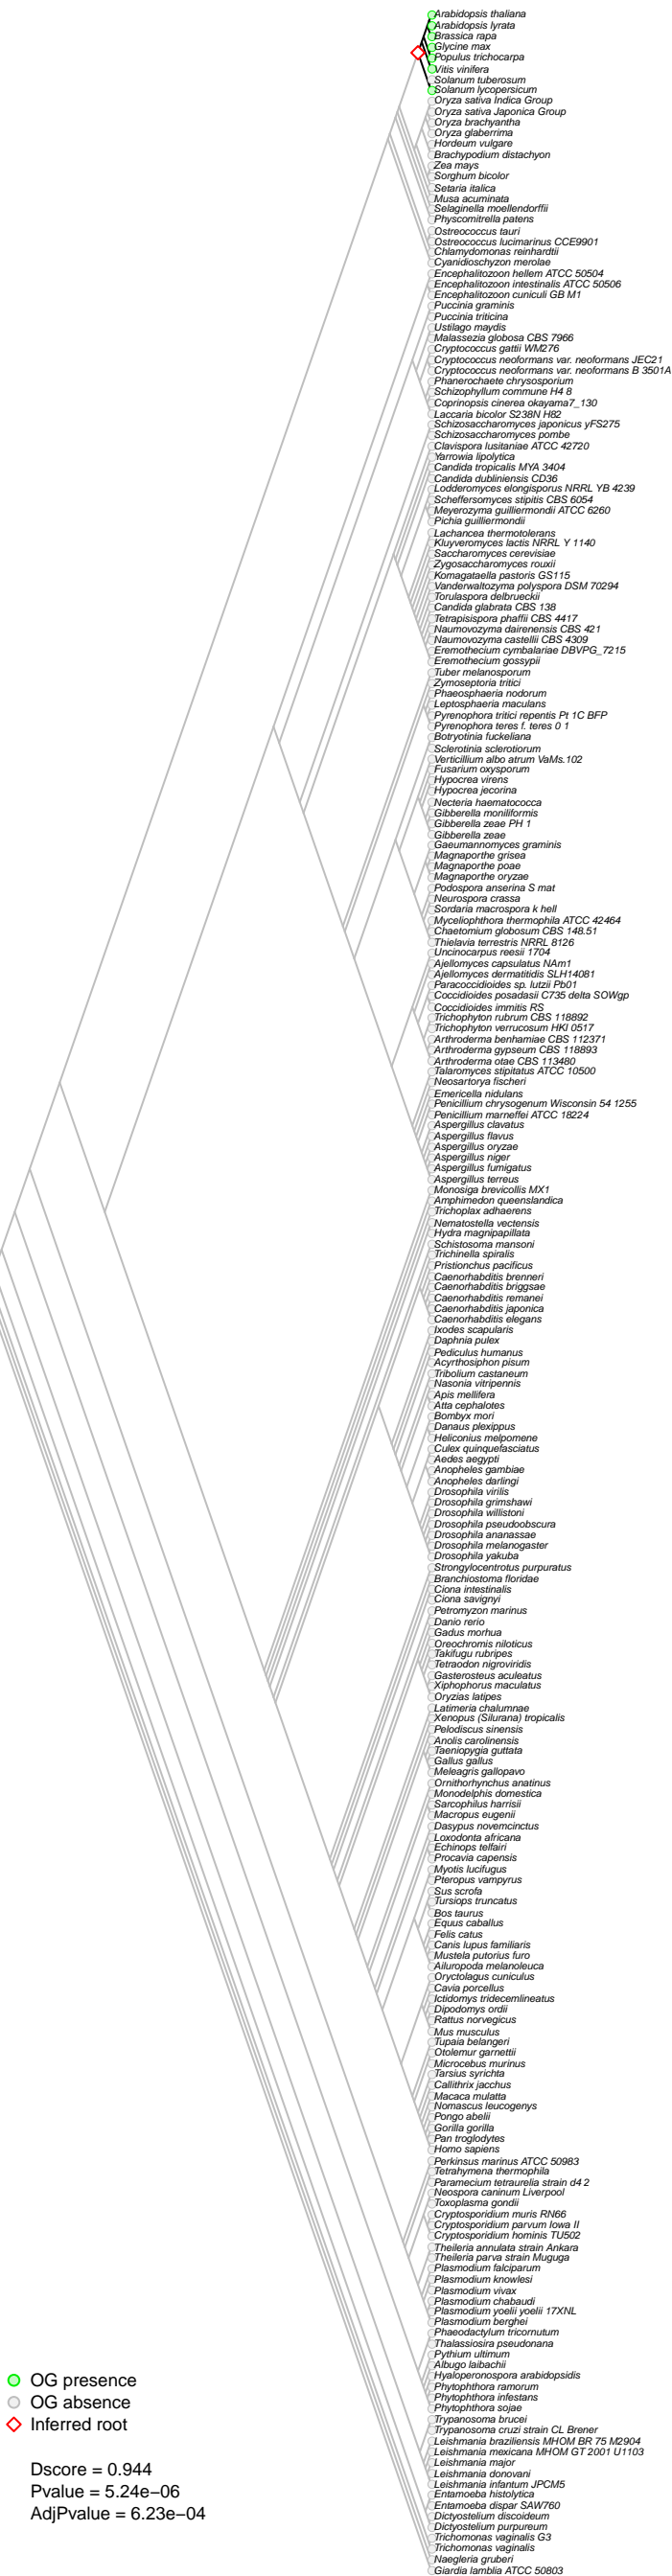

Dscore = 0.944  
 Pvalue = 5.24e-06  
 AdjPvalue = 6.23e-04

- Arabis thaliana
- Arabis lyrata
- Brassica rapa
- Glycine max
- Populus trichocarpa
- Vitis vinifera
- Solanum tuberosum
- Solanum lycopersicum
- Oryza sativa Indica Group
- Oryza sativa Japonica Group
- Oryza brachyantha
- Oryza glaberrima
- Hordeum vulgare
- Brachypodium distachyon
- Zea mays
- Sorghum bicolor
- Setaria italica
- Musa acuminata
- Selaginella moellendorffii
- Physcomitrella patens
- Ostreococcus tauri
- Ostreococcus lucimarinus CCE9901
- Chlamydomonas reinhardtii
- Cyanidioschyzon merolae
- Encephalitozoon hellem ATCC 50504
- Encephalitozoon intestinalis ATCC 50506
- Encephalitozoon cuniculi GB M1
- Puccinia graminis
- Puccinia triticina
- Ustilago maydis
- Melassezia globosa CBS 7966
- Cryptococcus gattii WM276
- Cryptococcus neoformans var. neoformans JEC21
- Cryptococcus neoformans var. neoformans B 3501A
- Phanerochaete chrysosporium
- Schizophyllum commune H4 B
- Coprinopsis cinerea okayama7\_130
- Laccaria bicolor S238N H82
- Schizosaccharomyces japonicus yFS275
- Schizosaccharomyces pombe
- Clavospora lusitaniae ATCC 42720
- Yarrowia lipolytica
- Candida tropicalis MYA 3404
- Candida dubliniensis CD36
- Lodderomyces elongisporus NRRL YB 4239
- Scheffersomyces stipitis CBS 6054
- Meyerozyma guilliermondii ATCC 6260
- Pichia guilliermondii
- Lachancea thermotolerans
- Kluyveromyces fragilis NRRL Y 1140
- Saccharomyces cerevisiae
- Zygosaccharomyces rouxii
- Komagataella pastoris GS115
- Vanderwaltozyma polyspora DSM 70294
- Torulopsis delbrueckii
- Candida glabrata CBS 138
- Tetrapispora phaffii CBS 4417
- Naumovozyma dairenensis CBS 421
- Naumovozyma castellii CBS 4309
- Eremothecium cymbalariae DBVPG\_7215
- Eremothecium gossypii
- Tuber melanosporum
- Zymoseptoria tritici
- Phaeosphaeria nodorum
- Leptosphaeria maculans
- Pyrenophora tritici repens Pt 1C BFP
- Pyrenophora teres f. teres 0 1
- Botryotinia fuckeliana
- Sclerotinia sclerotiorum
- Verticillium albo atrum VaMs.102
- Fusarium oxysporum
- Hypocrea virens
- Hypocrea jecorina
- Nectria haematococca
- Gibberella moniliformis
- Gibberella zeae PH 1
- Gibberella zeae
- Gaeumannomyces graminis
- Magnaporthe grisea
- Magnaporthe poae
- Magnaporthe oryzae
- Podospira anserina S mat
- Neurospora crassa
- Sordaria macrospora k hell
- Myceliophthora thermophila ATCC 42464
- Chaetomium globosum CBS 148.51
- Thielavia terrestris NRRL 8126
- Uncinocarpus reesii 1704
- Ajellomyces capsulatus Nam1
- Ajellomyces dermatitidis SLH14081
- Paracoccidioides sp. lutzi Fb01
- Coccidioides posadasii C735 delta SOWgp
- Coccidioides immitis RS
- Trichophyton rubrum CBS 118892
- Trichophyton verrucosum HKI 0517
- Arthroderma benhamiae CBS 112371
- Arthroderma gypseum CBS 118893
- Arthroderma otae CBS 113480
- Talaromyces stipitatus ATCC 10500
- Neosartorya fischeri
- Emericella nidulans
- Penicillium chrysogenum Wisconsin 54 1255
- Penicillium marneffei ATCC 18224
- Aspergillus clavatus
- Aspergillus flavus
- Aspergillus oryzae
- Aspergillus niger
- Aspergillus fumigatus
- Aspergillus terreus
- Monosiga brevicollis MX1
- Amphimedon queenslandica
- Trichoplax adhaerens
- Nematostella vectensis
- Hydra magnipapillata
- Schistosoma mansoni
- Trichinella spiralis
- Pristionchus pacificus
- Caenorhabditis brenneri
- Caenorhabditis briggsae
- Caenorhabditis remanei
- Caenorhabditis japonica
- Caenorhabditis elegans
- Ixodes scapularis
- Daphnia pulex
- Pediculus humanus
- Acyrtosiphon pisum
- Tribolium castaneum
- Nasonia vitripennis
- Apis mellifera
- Atta cephalotes
- Bombyx mori
- Danaus plexippus
- Heliconius melpomene
- Culex quinquefasciatus
- Aedes aegypti
- Anopheles gambiae
- Anopheles darlingi
- Drosophila virilis
- Drosophila grimshawi
- Drosophila willistoni
- Drosophila pseudoobscura
- Drosophila ananassae
- Drosophila melanogaster
- Drosophila yakuba
- Strongylocentrotus purpuratus
- Branchiostoma floridae
- Ciona intestinalis
- Ciona savignyi
- Petromyzon marinus
- Danio rerio
- Gadus morhua
- Oreochromis niloticus
- Takifugu rubripes
- Tetraodon nigroviridis
- Gasterosteus aculeatus
- Xiphophorus maculatus
- Oryzias latipes
- Latimeria chalumnae
- Xenopus (Silurana) tropicalis
- Pelodiscus sinensis
- Anolis carolinensis
- Taeniopygia guttata
- Gallus gallus
- Meleagris gallopavo
- Ornithorhynchus anatinus
- Monodelphis domestica
- Sarcophilus harrisii
- Macropus eugenii
- Dasyurus novemcinctus
- Loxodonta africana
- Echinops telitarii
- Procavia capensis
- Myotis lucifugus
- Pteropus vampyrus
- Sus scrofa
- Tursiops truncatus
- Bos taurus
- Equus caballus
- Felis catus
- Canis lupus familiaris
- Mustela putorius furo
- Alluropoda melanoleuca
- Cryptolestes cuniculus
- Cavia porcellus
- Ictidomys tridecemlineatus
- Dipodomys ordii
- Rattus norvegicus
- Mus musculus
- Tupaia belangeri
- Otolomus garretti
- Microcebus murinus
- Tarsius syrichta
- Callithrix jacchus
- Macaca mulatta
- Nomascus leucogenys
- Pongo abelii
- Gorilla gorilla
- Pan troglodytes
- Homo sapiens
- Perkinsus marinus ATCC 50983
- Tetrahymena thermophila
- Paramecium tetraurelia strain d4 2
- Neospora caninum Liverpool
- Toxoplasma gondii
- Cryptosporidium muris RN66
- Cryptosporidium parvum Iowa II
- Cryptosporidium hominis TU502
- Theileria annulata strain Ankara
- Theileria parva strain Muguga
- Plasmodium falciparum
- Plasmodium knowlesi
- Plasmodium vivax
- Plasmodium chabaudi
- Plasmodium yoelii yoelii 17XNL
- Plasmodium berghei
- Phaeodactylum tricornutum
- Thalassiosira pseudonana
- Pythium ultimum
- Albugo laibachii
- Hyaloperonospora arabidopsidis
- Phytophthora ramorum
- Phytophthora infestans
- Phytophthora sojae
- Trypanosoma brucei
- Trypanosoma cruzi strain CL Brener
- Leishmania braziliensis MHOM BR 75 M2904
- Leishmania mexicana MHOM GT 2001 U1103
- Leishmania major
- Leishmania donovani
- Leishmania infantum JPCM5
- Entamoeba histolytica
- Entamoeba dispar SAW760
- Dicystostellum discoideum
- Dicystostellum purpureum
- Trichomonas vaginalis G3
- Trichomonas vaginalis
- Naegleria gruberi
- Giardia lamblia ATCC 50803

- OG presence
- OG absence
- Inferred root

Dscore = 0.917

Pvalue = 3.18e-06

AdjPvalue = 3.78e-04



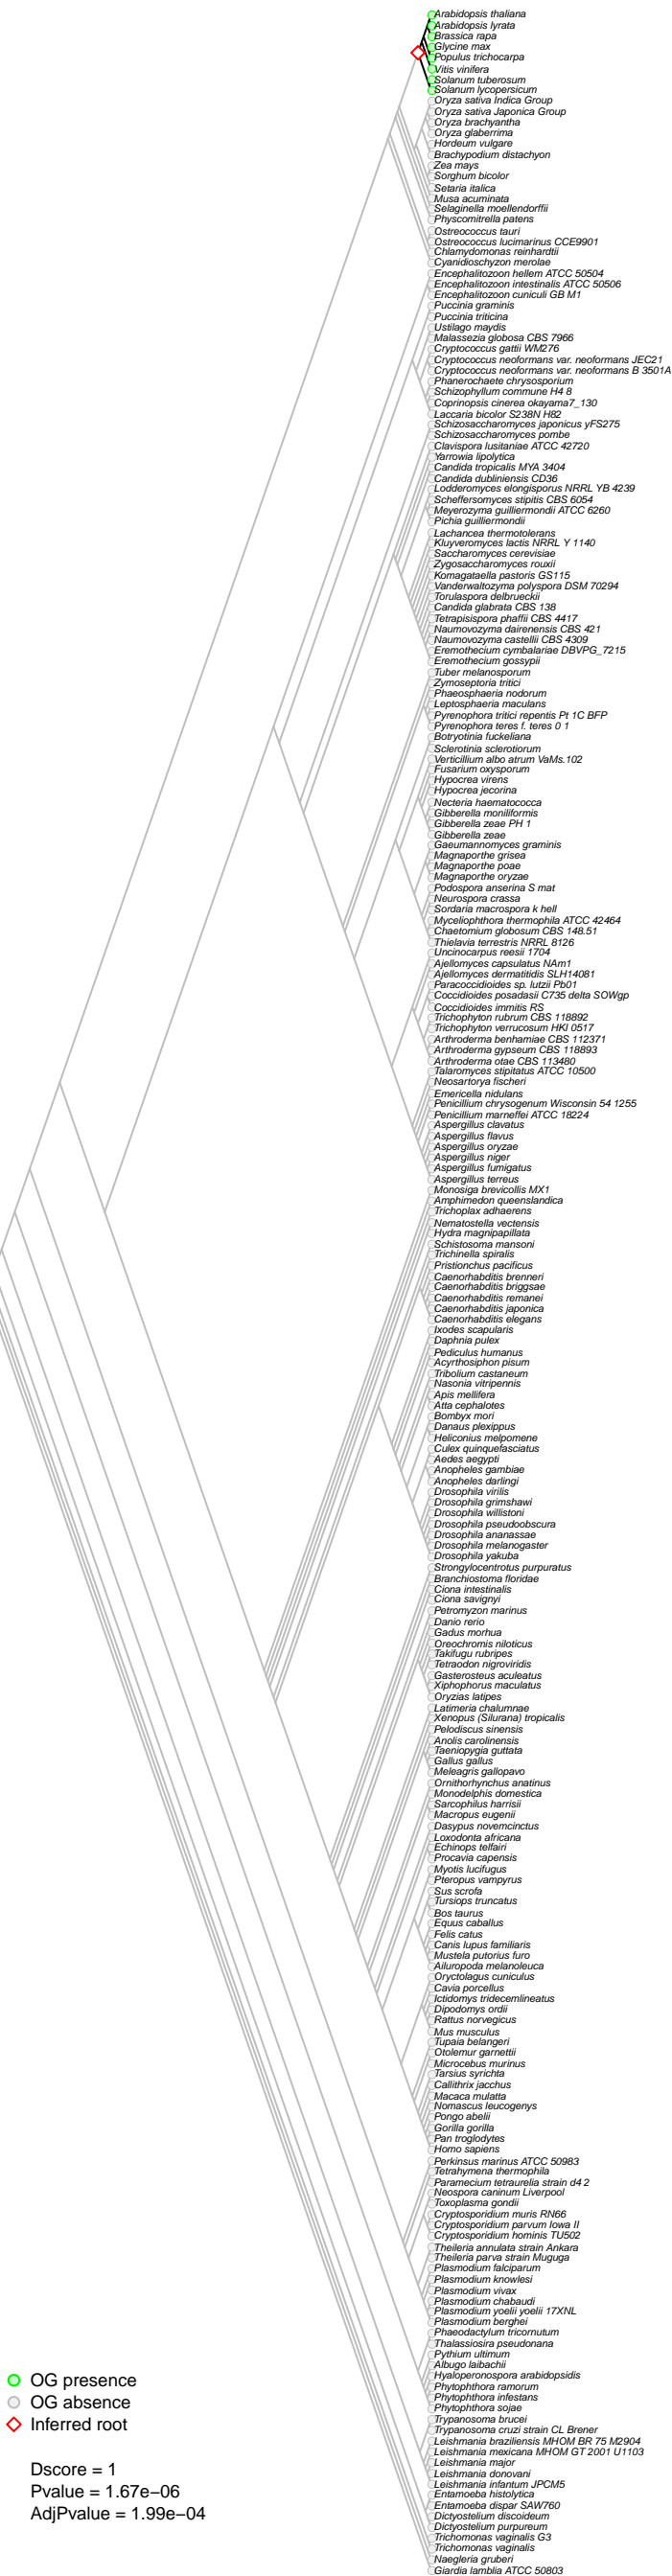

Dscore = 1  
 Pvalue = 1.67e-06  
 AdjPvalue = 1.99e-04

- Arabis thaliana
- Arabis lyrata
- Brassica rapa
- Glycine max
- Populus trichocarpa
- Vitis vinifera
- Solanum tuberosum
- Solanum lycopersicum
- Oryza sativa Indica Group
- Oryza sativa Japonica Group
- Oryza brachyantha
- Oryza glaberrima
- Hordeum vulgare
- Brachypodium distachyon
- Zea mays
- Sorghum bicolor
- Setaria italica
- Musa acuminata
- Selaginella moellendorffii
- Physcomitrella patens
- Ostreococcus tauri
- Ostreococcus lucimarinus CCE9901
- Chlamydomonas reinhardtii
- Cyanidioschyzon merolae
- Encephalitozoon hellem ATCC 50504
- Encephalitozoon intestinalis ATCC 50506
- Encephalitozoon cuniculi GB M1
- Puccinia graminis
- Puccinia triticina
- Ustilago maydis
- Malassezia globosa CBS 7966
- Cryptococcus gattii WM276
- Cryptococcus neoformans var. neoformans JEC21
- Cryptococcus neoformans var. neoformans B 3501A
- Phanerochaete chrysosporium
- Schizophyllum commune H4 B
- Coprinopsis cinerea okayama7\_130
- Laccaria bicolor S238N H82
- Schizosaccharomyces japonicus yFS275
- Schizosaccharomyces pombe
- Clavospora lusitanae ATCC 42720
- Yarrowia lipolytica
- Candida tropicalis MYA 3404
- Candida dubliniensis CD36
- Lodderomyces elongisporus NRRL YB 4239
- Scheffersomyces stipitis CBS 6054
- Meyerozyma guilliermondii ATCC 6260
- Pichia guilliermondii
- Lachancea thermotolerans
- Kluyveromyces fragilis NRRL Y 1140
- Saccharomyces cerevisiae
- Zygosaccharomyces rouxii
- Komagataella pastoris GS115
- Vanderwaltozyma polyspora DSM 70294
- Torulopsis delbrueckii
- Candida glabrata CBS 138
- Tetrapispora phaffii CBS 4417
- Naumovozyma dairensis CBS 421
- Naumovozyma castellii CBS 4309
- Eremothecium cymbalariae DBVPG\_7215
- Eremothecium gossypii
- Tuber melanosporum
- Zyoseptoria tritici
- Phaeosphaeria nodorum
- Leptosphaeria maculans
- Pyrenophora tritici repens Pt 1C BFP
- Pyrenophora teres f. teres 0 1
- Botryotinia fuckeliana
- Sclerotinia sclerotiorum
- Verticillium albo atrum VaMs.102
- Fusarium oxysporum
- Hypocrea virens
- Hypocrea jecorina
- Nectria haematococca
- Gibberella moniliformis
- Gibberella zeae PH 1
- Gibberella zeae
- Gaeumannomyces graminis
- Magnaporthe grisea
- Magnaporthe poae
- Magnaporthe oryzae
- Podospira anserina S mat
- Neurospora crassa
- Sordaria macrospora k hell
- Myceliophthora thermophila ATCC 42464
- Chaetomium globosum CBS 148.51
- Thielavia terrestris NRRL 8126
- Uncinocarpus reesii 1704
- Ajellomyces capsulatus Nam1
- Ajellomyces dermatitidis SLH14081
- Paracoccidioides sp. lutzi Fb01
- Coccidioides posadasii C735 delta SOWgp
- Coccidioides immitis RS
- Trichophyton rubrum CBS 118892
- Trichophyton verrucosum HKI 0517
- Arthroderma benhamiae CBS 112371
- Arthroderma gypseum CBS 118893
- Arthroderma otae CBS 113480
- Talaromyces stipitatus ATCC 10500
- Neosartorya fischeri
- Emericella nidulans
- Penicillium chrysogenum Wisconsin 54 1255
- Penicillium marneffei ATCC 18224
- Aspergillus clavatus
- Aspergillus flavus
- Aspergillus oryzae
- Aspergillus niger
- Aspergillus fumigatus
- Aspergillus terreus
- Monosiga brevicollis MX1
- Amphimedon queenslandica
- Trichoplax adhaerens
- Nematostella vectensis
- Hydra magnipapillata
- Schistosoma mansoni
- Trichinella spiralis
- Pristionchus pacificus
- Caenorhabditis brenneri
- Caenorhabditis briggsae
- Caenorhabditis remanei
- Caenorhabditis japonica
- Caenorhabditis elegans
- Ixodes scapularis
- Daphnia pulex
- Pediculus humanus
- Acyrtosiphon pisum
- Tribolium castaneum
- Nasonia vitripennis
- Apis mellifera
- Atta cephalotes
- Bombyx mori
- Danaus plexippus
- Heliconius melpomene
- Culex quinquefasciatus
- Aedes aegypti
- Anopheles gambiae
- Anopheles darlingi
- Drosophila virilis
- Drosophila grimshawi
- Drosophila willistoni
- Drosophila pseudoobscura
- Drosophila ananassae
- Drosophila melanogaster
- Drosophila yakuba
- Strongylocentrotus purpuratus
- Branchiostoma floridae
- Ciona intestinalis
- Ciona savignyi
- Petromyzon marinus
- Danio rerio
- Gadus morhua
- Oreochromis niloticus
- Takifugu rubripes
- Tetraodon nigroviridis
- Gasterosteus aculeatus
- Xiphophorus maculatus
- Oryzias latipes
- Latimeria chalumnae
- Xenopus (Silurana) tropicalis
- Pelodiscus sinensis
- Anolis carolinensis
- Taeniopygia guttata
- Gallus gallus
- Meleagris gallopavo
- Ornithorhynchus anatinus
- Monodelphis domestica
- Sarcophilus harrisii
- Macropus eugenii
- Dasyurus novemcinctus
- Loxodonta africana
- Echinops telillari
- Procavia capensis
- Myotis lucifugus
- Pteropus vampyrus
- Sus scrofa
- Tursiops truncatus
- Bos taurus
- Equus caballus
- Felis catus
- Canis lupus familiaris
- Mustela putorius furo
- Alluropoda melanoleuca
- Cryptolestes cuniculus
- Cavia porcellus
- Ictidomys tridecemlineatus
- Dipodomys ordii
- Rattus norvegicus
- Mus musculus
- Tupaia belangeri
- Otolomus garrettii
- Microcebus murinus
- Tarsius syrichta
- Callithrix jacchus
- Macaca mulatta
- Nomascus leucogenys
- Pongo abelii
- Gorilla gorilla
- Pan troglodytes
- Homo sapiens
- Perkinsus marinus ATCC 50983
- Tetrahymena thermophila
- Paramecium tetraurelia strain d4 2
- Neospora caninum Liverpool
- Toxoplasma gondii
- Cryptosporidium muris RN66
- Cryptosporidium parvum Iowa II
- Cryptosporidium hominis TU502
- Theileria annulata strain Ankara
- Theileria parva strain Muguga
- Plasmodium falciparum
- Plasmodium knowlesi
- Plasmodium vivax
- Plasmodium chabaudi
- Plasmodium yoelii yoelii 17XNL
- Plasmodium berghei
- Phaeodactylum tricornutum
- Thalassiosira pseudonana
- Pythium ultimum
- Albugo laibachii
- Hyaloperonospora arabidopsidis
- Phytophthora ramorum
- Phytophthora infestans
- Phytophthora sojae
- Trypanosoma brucei
- Trypanosoma cruzi strain CL Brener
- Leishmania braziliensis MHOM BR 75 M2904
- Leishmania mexicana MHOM GT 2001 U1103
- Leishmania major
- Leishmania donovani
- Leishmania infantum JPCM5
- Entamoeba histolytica
- Entamoeba dispar SAW760
- Dicystostellum discoideum
- Dicystostellum purpureum
- Trichomonas vaginalis G3
- Trichomonas vaginalis
- Naegleria gruberi
- Giardia lamblia ATCC 50803

- OG presence
- OG absence
- Inferred root

Dscore = 0.917  
Pvalue = 1.73e-06  
AdjPvalue = 2.06e-04

- Arabis thaliana
- Arabis lyrata
- Brassica rapa
- Glycine max
- Populus trichocarpa
- Vitis vinifera
- Solanum tuberosum
- Solanum lycopersicum
- Oryza sativa Indica Group
- Oryza sativa Japonica Group
- Oryza brachyantha
- Oryza glaberrima
- Hordeum vulgare
- Brachypodium distachyon
- Zea mays
- Sorghum bicolor
- Setaria italica
- Musa acuminata
- Selaginella moellendorffii
- Physcomitrella patens
- Ostreococcus tauri
- Ostreococcus lucimarinus CCE9901
- Chlamydomonas reinhardtii
- Cyanidioschyzon merolae
- Encephalitozoon hellem ATCC 50504
- Encephalitozoon intestinalis ATCC 50506
- Encephalitozoon cuniculi GB M1
- Puccinia graminis
- Puccinia triticina
- Ustilago maydis
- Melassezia globosa CBS 7966
- Cryptococcus gattii WM276
- Cryptococcus neoformans var. neoformans JEC21
- Cryptococcus neoformans var. neoformans B 3501A
- Phanerochaete chrysosporium
- Schizophyllum commune H4 B
- Coprinopsis cinerea okayama7\_130
- Laccaria bicolor S238N H82
- Schizosaccharomyces japonicus yFS275
- Schizosaccharomyces pombe
- Clavospora lusitanae ATCC 42720
- Yarrowia lipolytica
- Candida tropicalis MYA 3404
- Candida dubliniensis CD36
- Lodderomyces elongisporus NRRL YB 4239
- Scheffersomyces stipitis CBS 6054
- Meyerozyma guilliermondii ATCC 6260
- Pichia guilliermondii
- Lachancea thermotolerans
- Kluyveromyces fragilis NRRL Y 1140
- Saccharomyces cerevisiae
- Zygosaccharomyces rouxii
- Komagataella pastoris GS115
- Vanderwaltozyma polyspora DSM 70294
- Torulopsis delbrueckii
- Candida glabrata CBS 138
- Tetrapispora phaffii CBS 4417
- Naumovozyma dairensis CBS 421
- Naumovozyma castellii CBS 4309
- Eremothecium cymbalariae DBVPG\_7215
- Eremothecium gossypii
- Tuber melanosporum
- Zymoseptoria tritici
- Phaeosphaeria nodorum
- Leptosphaeria maculans
- Pyrenophora tritici repens Pt 1C BFP
- Pyrenophora teres f. teres 0 1
- Botryotinia fuckeliana
- Sclerotinia sclerotiorum
- Verticillium albo atrum VaMs.102
- Fusarium oxysporum
- Hypocrea virens
- Hypocrea jecorina
- Nectria haematococca
- Gibberella moniliformis
- Gibberella zeae PH 1
- Gibberella zeae
- Gaeumannomyces graminis
- Magnaporthe grisea
- Magnaporthe poae
- Magnaporthe oryzae
- Podospira anserina S mat
- Neurospora crassa
- Sordaria macrospora k hell
- Myceliophthora thermophila ATCC 42464
- Chaetomium globosum CBS 148.51
- Thielavia terrestris NRRL 8126
- Uncinocarpus reesii 1704
- Ajellomyces capsulatus Nam1
- Ajellomyces dermatitidis SLH14081
- Paracoccidioides sp. lutzi Fb01
- Coccidioides posadasii C735 delta SOWgp
- Coccidioides immitis RS
- Trichophyton rubrum CBS 118892
- Trichophyton verrucosum HKI 0517
- Arthroderma benhamiae CBS 112371
- Arthroderma gypseum CBS 118893
- Arthroderma otae CBS 113480
- Talaromyces stipitatus ATCC 10500
- Neosartorya fischeri
- Emericella nidulans
- Penicillium chrysogenum Wisconsin 54 1255
- Penicillium marneffei ATCC 18224
- Aspergillus clavatus
- Aspergillus flavus
- Aspergillus oryzae
- Aspergillus niger
- Aspergillus fumigatus
- Aspergillus terreus
- Monosiga brevicollis MX1
- Amphimedon queenslandica
- Trichoplax adhaerens
- Nematostella vectensis
- Hydra magnipapillata
- Schistosoma mansoni
- Trichinella spiralis
- Pristionchus pacificus
- Caenorhabditis brenneri
- Caenorhabditis briggsae
- Caenorhabditis remanei
- Caenorhabditis japonica
- Caenorhabditis elegans
- Ixodes scapularis
- Daphnia pulex
- Pediculus humanus
- Acyrtosiphon pisum
- Tribolium castaneum
- Nasonia vitripennis
- Apis mellifera
- Atta cephalotes
- Bombyx mori
- Danaus plexippus
- Heliconius melpomene
- Culex quinquefasciatus
- Aedes aegypti
- Anopheles gambiae
- Anopheles darlingi
- Drosophila virilis
- Drosophila grimshawi
- Drosophila willistoni
- Drosophila pseudoobscura
- Drosophila ananassae
- Drosophila melanogaster
- Drosophila yakuba
- Strongylocentrotus purpuratus
- Branchiostoma floridae
- Ciona intestinalis
- Ciona savignyi
- Petromyzon marinus
- Danio rerio
- Gadus morhua
- Oreochromis niloticus
- Takifugu rubripes
- Tetraodon nigroviridis
- Gasterosteus aculeatus
- Xiphophorus maculatus
- Oryzias latipes
- Latimeria chalumnae
- Xenopus (Silurana) tropicalis
- Pelodiscus sinensis
- Anolis carolinensis
- Taeniopygia guttata
- Gallus gallus
- Meleagris gallopavo
- Ornithorhynchus anatinus
- Monodelphis domestica
- Sarcophilus harrisii
- Macropus eugenii
- Dasyurus novemcinctus
- Loxodonta africana
- Echinops telillari
- Procavia capensis
- Myotis lucifugus
- Pteropus vampyrus
- Sus scrofa
- Tursiops truncatus
- Bos taurus
- Equus caballus
- Felis catus
- Canis lupus familiaris
- Mustela putorius furo
- Alluropoda melanoleuca
- Cryptolestes cuniculus
- Cavia porcellus
- Ictidomys tridecemlineatus
- Dipodomys ordii
- Rattus norvegicus
- Mus musculus
- Tupaia belangeri
- Otolomus garretti
- Microcebus murinus
- Tarsius syrichta
- Callithrix jacchus
- Macaca mulatta
- Nomascus leucogenys
- Pongo abelii
- Gorilla gorilla
- Pan troglodytes
- Homo sapiens
- Perkinsus marinus ATCC 50983
- Tetrahymena thermophila
- Paramecium tetraurelia strain d4 2
- Neospora caninum Liverpool
- Toxoplasma gondii
- Cryptosporidium muris RN66
- Cryptosporidium parvum Iowa II
- Cryptosporidium hominis TU502
- Theileria annulata strain Ankara
- Theileria parva strain Muguga
- Plasmodium falciparum
- Plasmodium knowlesi
- Plasmodium vivax
- Plasmodium chabaudi
- Plasmodium yoelii yoelii 17XNL
- Plasmodium berghei
- Phaeodactylum tricornutum
- Thalassiosira pseudonana
- Pythium ultimum
- Albugo liliaceae
- Hyaloperonospora arabidopsidis
- Phytophthora ramorum
- Phytophthora infestans
- Phytophthora sojae
- Trypanosoma brucei
- Trypanosoma cruzi strain CL Brener
- Leishmania braziliensis MHOM BR 75 M2904
- Leishmania mexicana MHOM GT 2001 U1103
- Leishmania major
- Leishmania donovani
- Leishmania infantum JPCM5
- Entamoeba histolytica
- Entamoeba dispar SAW760
- Dicystostellum discoideum
- Dicystostellum purpureum
- Trichomonas vaginalis G3
- Trichomonas vaginalis
- Naegleria gruberi
- Giardia lamblia ATCC 50803

- OG presence
- OG absence
- Inferred root

Dscore = 1  
Pvalue = 4.05e-07  
AdjPvalue = 4.82e-05

- Arabis thaliana
- Arabidopsis lyrata
- Brassica rapa
- Glycine max
- Populus trichocarpa
- Vitis vinifera
- Solanum tuberosum
- Solanum lycopersicum
- Oryza sativa Indica Group
- Oryza sativa Japonica Group
- Oryza brachyantha
- Oryza glaberrima
- Hordeum vulgare
- Brachypodium distachyon
- Zea mays
- Sorghum bicolor
- Setaria italica
- Musa acuminata
- Salvinella moellendorffii
- Physcomitrella patens
- Ostreococcus tauri
- Ostreococcus lucimarinus CCE9901
- Chlamydomonas reinhardtii
- Cyanidioschyzon merolae
- Encephalitozoon hellem ATCC 50504
- Encephalitozoon intestinalis ATCC 50506
- Encephalitozoon cuniculi GB M1
- Puccinia graminis
- Puccinia triticina
- Ustilago maydis
- Melassezia globosa CBS 7966
- Cryptococcus gattii WM276
- Cryptococcus neoformans var. neoformans JEC21
- Cryptococcus neoformans var. neoformans B 3501A
- Phanerochaete chrysosporium
- Schizophyllum commune H4 B
- Coprinopsis cinerea okayama7\_130
- Laccaria bicolor S238N H82
- Schizosaccharomyces japonicus yFS275
- Schizosaccharomyces pombe
- Clavospora lusitanae ATCC 42720
- Yarrowia lipolytica
- Candida tropicalis MYA 3404
- Candida dubliniensis CD36
- Lodderomyces elongisporus NRRL YB 4239
- Scheffersomyces stipitis CBS 6054
- Meyerozyma guilliermondii ATCC 6260
- Pichia guilliermondii
- Lachancea thermotolerans
- Kluyveromyces fragilis NRRL Y 1140
- Saccharomyces cerevisiae
- Zygosaccharomyces rouxii
- Komagataella pastoris GS115
- Vanderwaltozyma polyspora DSM 70294
- Torulopsis delbrueckii
- Candida glabrata CBS 138
- Tetrapispora phaffii CBS 4417
- Naumovozyma dairensis CBS 421
- Naumovozyma castellii CBS 4309
- Eremothecium cymbalariae DBVPG\_7215
- Eremothecium gossypii
- Tuber melanosporum
- Zymoseptoria tritici
- Phaeosphaeria nodorum
- Leptosphaeria maculans
- Pyrenophora tritici repens Pt 1C BFP
- Pyrenophora teres f. teres 0 1
- Botryotinia fuckeliana
- Sclerotinia sclerotiorum
- Verticillium albo atrum VaMs.102
- Fusarium oxysporum
- Hypocrea virens
- Hypocrea jecorina
- Nectria haematococca
- Gibberella moniliformis
- Gibberella zeae PH 1
- Gibberella zeae
- Gaeumannomyces graminis
- Magnaporthe grisea
- Magnaporthe poae
- Magnaporthe oryzae
- Podospira anserina S mat
- Neurospora crassa
- Sordaria macrospora k hell
- Myceliophthora thermophila ATCC 42464
- Chaetomium globosum CBS 148.51
- Thielavia terrestris NRRL 8126
- Uncinocarpus reesii 1704
- Ajellomyces capsulatus Nam1
- Ajellomyces dermatitidis SLH14081
- Paracoccidioides sp. lutzi Fb01
- Coccidioides posadasii C735 delta SOWgp
- Coccidioides immitis RS
- Trichophyton rubrum CBS 118892
- Trichophyton verrucosum HKI 0517
- Arthroderma benhamiae CBS 112371
- Arthroderma gypseum CBS 118893
- Arthroderma otae CBS 113480
- Talaromyces stipitatus ATCC 10500
- Neosartorya fischeri
- Emericella nidulans
- Penicillium chrysogenum Wisconsin 54 1255
- Penicillium marneffei ATCC 18224
- Aspergillus clavatus
- Aspergillus flavus
- Aspergillus oryzae
- Aspergillus niger
- Aspergillus fumigatus
- Aspergillus terreus
- Monosiga brevicollis MX1
- Amphimedon queenslandica
- Trichoplax adhaerens
- Nematostella vectensis
- Hydra magnipapillata
- Schistosoma mansoni
- Trichinella spiralis
- Pristionchus pacificus
- Caenorhabditis brenneri
- Caenorhabditis briggsae
- Caenorhabditis remanei
- Caenorhabditis japonica
- Caenorhabditis elegans
- Ixodes scapularis
- Daphnia pulex
- Pediculus humanus
- Acyrtosiphon pisum
- Tribolium castaneum
- Nasonia vitripennis
- Apis mellifera
- Atta cephalotes
- Bombyx mori
- Danaus plexippus
- Heliconia melpomene
- Culex quinquefasciatus
- Aedes aegypti
- Anopheles gambiae
- Anopheles darlingi
- Drosophila virilis
- Drosophila grimshawi
- Drosophila willistoni
- Drosophila pseudoobscura
- Drosophila ananassae
- Drosophila melanogaster
- Drosophila yakuba
- Strongylocentrotus purpuratus
- Branchiostoma floridae
- Ciona intestinalis
- Ciona savignyi
- Petromyzon marinus
- Danio rerio
- Gadus morhua
- Oreochromis niloticus
- Takifugu rubripes
- Tetraodon nigroviridis
- Gasterosteus aculeatus
- Xiphophorus maculatus
- Oryzias latipes
- Latimeria chalumnae
- Xenopus (Silurana) tropicalis
- Pelodiscus sinensis
- Anolis carolinensis
- Taeniopygia guttata
- Gallus gallus
- Meleagris gallopavo
- Ornithorhynchus anatinus
- Monodelphis domestica
- Sarcophilus harrisii
- Macropus eugenii
- Dasyurus novemcinctus
- Loxodonta africana
- Echinops telillari
- Procavia capensis
- Myotis lucifugus
- Pteropus vampyrus
- Sus scrofa
- Tursiops truncatus
- Bos taurus
- Equus caballus
- Felis catus
- Canis lupus familiaris
- Mustela putorius furo
- Alluropoda melanoleuca
- Cryptolestes cuniculus
- Cavia porcellus
- Ictidomys tridecemlineatus
- Dipodomys ordii
- Rattus norvegicus
- Mus musculus
- Tupaia belangeri
- Otolomus garretti
- Microcebus murinus
- Tarsius syrichta
- Callithrix jacchus
- Macaca mulatta
- Nomascus leucogenys
- Pongo abelii
- Gorilla gorilla
- Pan troglodytes
- Homo sapiens
- Perkinsus marinus ATCC 50983
- Tetrahymena thermophila
- Paramecium tetraurelia strain d4 2
- Neospora caninum Liverpool
- Toxoplasma gondii
- Cryptosporidium muris RN66
- Cryptosporidium parvum Iowa II
- Cryptosporidium hominis TU502
- Theileria annulata strain Ankara
- Theileria parva strain Muguga
- Plasmodium falciparum
- Plasmodium knowlesi
- Plasmodium vivax
- Plasmodium chabaudi
- Plasmodium yoelii yoelii 17XNL
- Plasmodium berghei
- Phaeodactylum tricornutum
- Thalassiosira pseudonana
- Pythium ultimum
- Albugo liliaceae
- Hyaloperonospora arabidopsidis
- Phytophthora ramorum
- Phytophthora infestans
- Phytophthora sojae
- Trypanosoma brucei
- Trypanosoma cruzi strain CL Brener
- Leishmania braziliensis MHOM BR 75 M2904
- Leishmania mexicana MHOM GT 2001 U1103
- Leishmania major
- Leishmania donovani
- Leishmania infantum JPCM5
- Entamoeba histolytica
- Entamoeba dispar SAW760
- Dicystostellum discoideum
- Dicystostellum purpureum
- Trichomonas vaginalis G3
- Trichomonas vaginalis
- Naegleria gruberi
- Giardia lamblia ATCC 50803

- OG presence
- OG absence
- Inferred root

Dscore = 0.647  
Pvalue = 2.34e-03  
AdjPvalue = 2.78e-01

- Arabis thaliana
- Arabidopsis lyrata
- Brassica rapa
- Glycine max
- Populus trichocarpa
- Vitis vinifera
- Solanum tuberosum
- Solanum lycopersicum
- Oryza sativa Indica Group
- Oryza sativa Japonica Group
- Oryza brachyantha
- Oryza glaberrima
- Hordeum vulgare
- Brachypodium distachyon
- Zea mays
- Sorghum bicolor
- Setaria italica
- Musa acuminata
- Selaginella moellendorffii
- Physcomitrella patens
- Ostreococcus tauri
- Ostreococcus lucimarinus CCE9901
- Chlamydomonas reinhardtii
- Cyanidioschyzon merolae
- Encephalitozoon hellem ATCC 50504
- Encephalitozoon intestinalis ATCC 50506
- Encephalitozoon cuniculi GB M1
- Puccinia graminis
- Puccinia triticina
- Ustilago maydis
- Malassezia globosa CBS 7966
- Cryptococcus gattii WM276
- Cryptococcus neoformans var. neoformans JEC21
- Cryptococcus neoformans var. neoformans B 3501A
- Phanerochaete chrysosporium
- Schizophyllum commune H4 B
- Coprinopsis cinerea okayama7\_130
- Laccaria bicolor S238N H82
- Schizosaccharomyces japonicus yFS275
- Schizosaccharomyces pombe
- Clavospora lusitanae ATCC 42720
- Yarrowia lipolytica
- Candida tropicalis MYA 3404
- Candida dubliniensis CD36
- Lodderomyces elongisporus NRRL YB 4239
- Scheffersomyces stipitis CBS 6054
- Meyerozyma guilliermondii ATCC 6260
- Pichia guilliermondii
- Lachancea thermotolerans
- Kluyveromyces fragilis NRRL Y 1140
- Saccharomyces cerevisiae
- Zygosaccharomyces rouxii
- Komagataella pastoris GS115
- Vanderwaltozyma polyspora DSM 70294
- Torulopsis delbrueckii
- Candida glabrata CBS 138
- Tetrapispora phaffii CBS 4417
- Naumovozyma dairensis CBS 421
- Naumovozyma castellii CBS 4309
- Eremothecium cymbalariae DBVPG\_7215
- Eremothecium gossypii
- Tuber melanosporum
- Zymoseptoria tritici
- Phaeosphaeria nodorum
- Leptosphaeria maculans
- Pyrenophora tritici repens Pt 1C BFP
- Pyrenophora teres f. teres 0 1
- Botryotinia fuckeliana
- Sclerotinia sclerotiorum
- Verticillium albo atrum VaMs.102
- Fusarium oxysporum
- Hypocrea virens
- Hypocrea jecorina
- Nectria haematococca
- Gibberella moniliformis
- Gibberella zeae PH 1
- Gibberella zeae
- Gaeumannomyces graminis
- Magnaporthe grisea
- Magnaporthe poae
- Magnaporthe oryzae
- Podospira anserina S mat
- Neurospora crassa
- Sordaria macrospora k hell
- Myceliophthora thermophila ATCC 42464
- Chaetomium globosum CBS 148.51
- Thielavia terrestris NRRL 8126
- Uncinocarpus reesii 1704
- Ajellomyces capsulatus Nam1
- Ajellomyces dermatitidis SLH14081
- Paracoccidioides sp. lutzi Fb01
- Coccidioides posadasii C735 delta SOWgp
- Coccidioides immitis RS
- Trichophyton rubrum CBS 118892
- Trichophyton verrucosum HKI 0517
- Arthroderma benhamiae CBS 112371
- Arthroderma gypseum CBS 118893
- Arthroderma otae CBS 113480
- Talaromyces stipitatus ATCC 10500
- Neosartorya fischeri
- Emericella nidulans
- Penicillium chrysogenum Wisconsin 54 1255
- Penicillium marneffei ATCC 18224
- Aspergillus clavatus
- Aspergillus flavus
- Aspergillus oryzae
- Aspergillus niger
- Aspergillus fumigatus
- Aspergillus terreus
- Monosiga brevicollis MX1
- Amphimedon queenslandica
- Trichoplax adhaerens
- Nematostella vectensis
- Hydra magnipapillata
- Schistosoma mansoni
- Trichinella spiralis
- Pristionchus pacificus
- Caenorhabditis breneri
- Caenorhabditis briggsae
- Caenorhabditis remanei
- Caenorhabditis japonica
- Caenorhabditis elegans
- Ixodes scapularis
- Daphnia pulex
- Pediculus humanus
- Acyrtosiphon pisum
- Tribolium castaneum
- Nasonia vitripennis
- Apis mellifera
- Atta cephalotes
- Bombyx mori
- Danaus plexippus
- Heliconia melpomene
- Culex quinquefasciatus
- Aedes aegypti
- Anopheles gambiae
- Anopheles darlingi
- Drosophila virilis
- Drosophila grimshawi
- Drosophila willistoni
- Drosophila pseudoobscura
- Drosophila ananassae
- Drosophila melanogaster
- Drosophila yakuba
- Strongylocentrotus purpuratus
- Branchiostoma floridae
- Ciona intestinalis
- Ciona savignyi
- Petromyzon marinus
- Danio rerio
- Gadus morhua
- Oreochromis niloticus
- Takifugu rubripes
- Tetraodon nigroviridis
- Gasterosteus aculeatus
- Xiphophorus maculatus
- Oryzias latipes
- Latimeria chalumnae
- Xenopus (Silurana) tropicalis
- Pelodiscus sinensis
- Anolis carolinensis
- Taeniopygia guttata
- Gallus gallus
- Meleagris gallopavo
- Ornithorhynchus anatinus
- Monodelphis domestica
- Sarcophilus harrisii
- Macropus eugenii
- Dasyurus novemcinctus
- Loxodonta africana
- Echinops telillari
- Procavia capensis
- Myotis lucifugus
- Pteropus vampyrus
- Sus scrofa
- Tursiops truncatus
- Bos taurus
- Equus caballus
- Felis catus
- Canis lupus familiaris
- Mustela putorius furo
- Alluropoda melanoleuca
- Cryptolestes cuniculus
- Cavia porcellus
- Ictidomys tridecemlineatus
- Dipodomys ordii
- Rattus norvegicus
- Mus musculus
- Tupaia belangeri
- Otolemur garrettii
- Microcebus murinus
- Tarsius syrichta
- Callithrix jacchus
- Macaca mulatta
- Nomascus leucogenys
- Pongo abelii
- Gorilla gorilla
- Pan troglodytes
- Homo sapiens
- Perkinsus marinus ATCC 50983
- Tetrahymena thermophila
- Paramecium tetraurelia strain d4 2
- Neospora caninum Liverpool
- Toxoplasma gondii
- Cryptosporidium muris RN66
- Cryptosporidium parvum Iowa II
- Cryptosporidium hominis TU502
- Theileria annulata strain Ankara
- Theileria parva strain Muguga
- Plasmodium falciparum
- Plasmodium knowlesi
- Plasmodium vivax
- Plasmodium chabaudi
- Plasmodium yoelii yoelii 17XNL
- Plasmodium berghei
- Phaeodactylum tricornutum
- Thalassiosira pseudonana
- Pythium ultimum
- Albugo liliaceae
- Hyaloperonospora arabidopsidis
- Phytophthora ramorum
- Phytophthora infestans
- Phytophthora sojae
- Trypanosoma brucei
- Trypanosoma cruzi strain CL Brener
- Leishmania braziliensis MHOM BR 75 M2904
- Leishmania mexicana MHOM GT 2001 U1103
- Leishmania major
- Leishmania donovani
- Leishmania infantum JPCM5
- Entamoeba histolytica
- Entamoeba dispar SAW760
- Dicystostellum discoideum
- Dicystostellum purpureum
- Trichomonas vaginalis G3
- Trichomonas vaginalis
- Naegleria gruberi
- Giardia lamblia ATCC 50803

- OG presence
- OG absence
- Inferred root

Dscore = 1  
Pvalue = 1.54e-05  
AdjPvalue = 1.84e-03

- Arabis thaliana
- Arabidopsis lyrata
- Brassica rapa
- Glycine max
- Populus trichocarpa
- Vitis vinifera
- Solanum tuberosum
- Solanum lycopersicum
- Oryza sativa Indica Group
- Oryza sativa Japonica Group
- Oryza brachyantha
- Oryza glaberrima
- Hordeum vulgare
- Brachypodium distachyon
- Zea mays
- Sorghum bicolor
- Setaria italica
- Musa acuminata
- Salvinella moellendorffii
- Physcomitrella patens
- Ostreococcus tauri
- Ostreococcus lucimarinus CCE9901
- Chlamydomonas reinhardtii
- Cyanidioschyzon merolae
- Encephalitozoon hellem ATCC 50504
- Encephalitozoon intestinalis ATCC 50506
- Encephalitozoon cuniculi GB M1
- Puccinia graminis
- Puccinia triticina
- Ustilago maydis
- Melassezia globosa CBS 7966
- Cryptococcus gattii WM276
- Cryptococcus neoformans var. neoformans JEC21
- Cryptococcus neoformans var. neoformans B 3501A
- Phanerochaete chrysosporium
- Schizophyllum commune H4 B
- Coprinopsis cinerea okayama7\_130
- Laccaria bicolor S238N H82
- Schizosaccharomyces japonicus yFS275
- Schizosaccharomyces pombe
- Clavospora lusitanae ATCC 42720
- Yarrowia lipolytica
- Candida tropicalis MYA 3404
- Candida dubliniensis CD36
- Lodderomyces elongisporus NRRL YB 4239
- Scheffersomyces stipitis CBS 6054
- Meyerozyma guilliermondii ATCC 6260
- Pichia guilliermondii
- Lachancea thermotolerans
- Kluyveromyces fragilis NRRL Y 1140
- Saccharomyces cerevisiae
- Zygosaccharomyces rouxii
- Komagataella pastoris GS115
- Vanderwaltozyma polyspora DSM 70294
- Torulopsis delbrueckii
- Candida glabrata CBS 138
- Tetrapispora phaffii CBS 4417
- Naumovozyma dairenensis CBS 421
- Naumovozyma castellii CBS 4309
- Eremothecium cymbalariae DBVPG\_7215
- Eremothecium gossypii
- Tuber melanosporum
- Zymoseptoria tritici
- Phaeosphaeria nodorum
- Leptosphaeria maculans
- Pyrenophora tritici repens Pt 1C BFP
- Pyrenophora teres f. teres 0 1
- Botryotinia fuckeliana
- Sclerotinia sclerotiorum
- Verticillium albo atrum VaMs.102
- Fusarium oxysporum
- Hypocrea virens
- Hypocrea jecorina
- Nectria haematococca
- Gibberella moniliformis
- Gibberella zeae PH 1
- Gibberella zeae
- Gaeumannomyces graminis
- Magnaporthe grisea
- Magnaporthe poae
- Magnaporthe oryzae
- Podospira anserina S mat
- Neurospora crassa
- Sordaria macrospora k hell
- Myceliophthora thermophila ATCC 42464
- Chaetomium globosum CBS 148.51
- Thielavia terrestris NRRL 8126
- Uncinocarpus reesii 1704
- Ajellomyces capsulatus Nam1
- Ajellomyces dermatitidis SLH14081
- Paracoccidioides sp. lutzi Fb01
- Coccidioides posadasii C735 delta SOWgp
- Coccidioides immitis RS
- Trichophyton rubrum CBS 118892
- Trichophyton verrucosum HKI 0517
- Arthroderma benhamiae CBS 112371
- Arthroderma gypseum CBS 118893
- Arthroderma otae CBS 113480
- Talaromyces stipitatus ATCC 10500
- Neosartorya fischeri
- Emericella nidulans
- Penicillium chrysogenum Wisconsin 54 1255
- Penicillium marneffei ATCC 18224
- Aspergillus clavatus
- Aspergillus flavus
- Aspergillus oryzae
- Aspergillus niger
- Aspergillus fumigatus
- Aspergillus terreus
- Monosiga brevicollis MX1
- Amphimedon queenslandica
- Trichoplax adhaerens
- Nematostella vectensis
- Hydra magnipapillata
- Schistosoma mansoni
- Trichinella spiralis
- Pristionchus pacificus
- Caenorhabditis brenneri
- Caenorhabditis briggsae
- Caenorhabditis remanei
- Caenorhabditis japonica
- Caenorhabditis elegans
- Ixodes scapularis
- Daphnia pulex
- Pediculus humanus
- Acyrtosiphon pisum
- Tribolium castaneum
- Nasonia vitripennis
- Apis mellifera
- Atta cephalotes
- Bombyx mori
- Danaus plexippus
- Heliconius melpomene
- Culex quinquefasciatus
- Aedes aegypti
- Anopheles gambiae
- Anopheles darlingi
- Drosophila virilis
- Drosophila grimshawi
- Drosophila willistoni
- Drosophila pseudoobscura
- Drosophila ananassae
- Drosophila melanogaster
- Drosophila yakuba
- Strongylocentrotus purpuratus
- Branchiostoma floridae
- Ciona intestinalis
- Ciona savignyi
- Petromyzon marinus
- Danio rerio
- Gadus morhua
- Oreochromis niloticus
- Takifugu rubripes
- Tetraodon nigroviridis
- Gasterosteus aculeatus
- Xiphophorus maculatus
- Oryzias latipes
- Latimeria chalumnae
- Xenopus (Silurana) tropicalis
- Pelodiscus sinensis
- Anolis carolinensis
- Taeniopygia guttata
- Gallus gallus
- Meleagris gallopavo
- Ornithorhynchus anatinus
- Monodelphis domestica
- Sarcophilus harrisii
- Macropus eugenii
- Dasyurus novemcinctus
- Loxodonta africana
- Echinops telillari
- Procavia capensis
- Myotis lucifugus
- Pteropus vampyrus
- Sus scrofa
- Tursiops truncatus
- Bos taurus
- Equus caballus
- Felis catus
- Canis lupus familiaris
- Mustela putorius furo
- Alluropoda melanoleuca
- Cryptolestes cuniculus
- Cavia porcellus
- Ictidomys tridecemlineatus
- Dipodomys ordii
- Rattus norvegicus
- Mus musculus
- Tupaia belangeri
- Otolomus garretti
- Microcebus murinus
- Tarsius syrichta
- Callithrix jacchus
- Macaca mulatta
- Nomascus leucogenys
- Pongo abelii
- Gorilla gorilla
- Pan troglodytes
- Homo sapiens
- Perkinsus marinus ATCC 50983
- Tetrahymena thermophila
- Paramecium tetraurelia strain d4 2
- Neospora caninum Liverpool
- Toxoplasma gondii
- Cryptosporidium muris RN66
- Cryptosporidium parvum Iowa II
- Cryptosporidium hominis TU502
- Theileria annulata strain Ankara
- Theileria parva strain Muguga
- Plasmodium falciparum
- Plasmodium knowlesi
- Plasmodium vivax
- Plasmodium chabaudi
- Plasmodium yoelii yoelii 17XNL
- Plasmodium berghei
- Phaeodactylum tricornutum
- Thalassiosira pseudonana
- Pythium ultimum
- Albugo liliaceae
- Hyaloperonospora arabidopsidis
- Phytophthora ramorum
- Phytophthora infestans
- Phytophthora sojae
- Trypanosoma brucei
- Trypanosoma cruzi strain CL Brener
- Leishmania braziliensis MHOM BR 75 M2904
- Leishmania mexicana MHOM GT 2001 U1103
- Leishmania major
- Leishmania donovani
- Leishmania infantum JPCM5
- Entamoeba histolytica
- Entamoeba dispar SAW760
- Dicystostellum discoideum
- Dicystostellum purpureum
- Trichomonas vaginalis G3
- Trichomonas vaginalis
- Naegleria gruberi
- Giardia lamblia ATCC 50803

- OG presence
- OG absence
- Inferred root

Dscore = 0.875  
Pvalue = 3.65e-05  
AdjPvalue = 4.35e-03

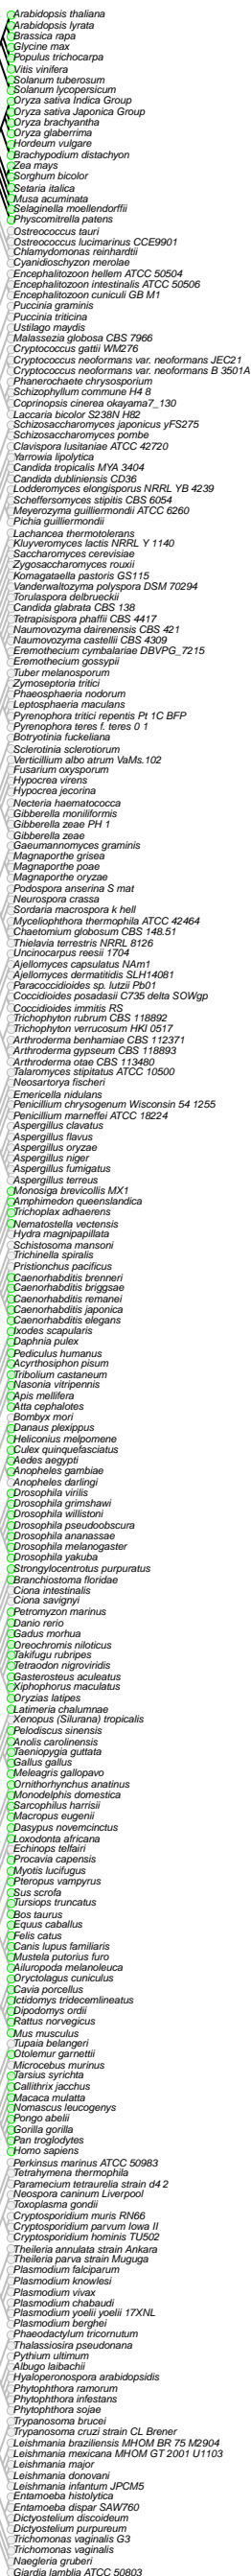

● OG presence  
 ○ OG absence  
 ◆ Inferred root

Dscore = 0.944  
 Pvalue = 1.91e-05  
 AdjPvalue = 2.27e-03

- Arabis thaliana
- Arabidopsis lyrata
- Brassica rapa
- Glycine max
- Populus trichocarpa
- Vitis vinifera
- Solanum tuberosum
- Solanum lycopersicum
- Oryza sativa Indica Group
- Oryza sativa Japonica Group
- Oryza brachyantha
- Oryza glaberrima
- Hordeum vulgare
- Brachypodium distachyon
- Zea mays
- Sorghum bicolor
- Setaria italica
- Musa acuminata
- Selaginella moellendorffii
- Physcomitrella patens
- Ostreococcus tauri
- Ostreococcus lucimarinus CCE9901
- Chlamydomonas reinhardtii
- Cyanidioschyzon merolae
- Encephalitozoon hellem ATCC 50504
- Encephalitozoon intestinalis ATCC 50506
- Encephalitozoon cuniculi GB M1
- Puccinia graminis
- Puccinia triticina
- Ustilago maydis
- Malassezia globosa CBS 7966
- Cryptococcus gattii WM276
- Cryptococcus neoformans var. neoformans JEC21
- Cryptococcus neoformans var. neoformans B 3501A
- Phanerochaete chrysosporium
- Schizophyllum commune H4 B
- Coprinopsis cinerea okayama7\_130
- Laccaria bicolor S238N H82
- Schizosaccharomyces japonicus yFS275
- Schizosaccharomyces pombe
- Clavospora lusitanae ATCC 42720
- Yarrowia lipolytica
- Candida tropicalis MYA 3404
- Candida dubliniensis CD36
- Lodderomyces elongisporus NRRL YB 4239
- Scheffersomyces stipitis CBS 6054
- Meyerozyma guilliermondii ATCC 6260
- Pichia guilliermondii
- Lachancea thermotolerans
- Kluyveromyces fragilis NRRL Y 1140
- Saccharomyces cerevisiae
- Zygosaccharomyces rouxii
- Komagataella pastoris GS115
- Vanderwaltozyma polyspora DSM 70294
- Torulopsis delbrueckii
- Candida glabrata CBS 138
- Tetrapisispora phaffii CBS 4417
- Naumovozyma dairensis CBS 421
- Naumovozyma castellii CBS 4309
- Eremothecium cymbalariae DBVPG\_7215
- Eremothecium gossypii
- Tuber melanosporum
- Zymoseptoria tritici
- Phaeosphaeria nodorum
- Leptosphaeria maculans
- Pyrenophora tritici repens Pt 1C BFP
- Pyrenophora teres f. teres 0 1
- Botryotinia fuckeliana
- Sclerotinia sclerotiorum
- Verticillium albo atrum VaMs.102
- Fusarium oxysporum
- Hypocrea virens
- Hypocrea jecorina
- Nectria haematococca
- Gibberella moniliformis
- Gibberella zeae PH 1
- Gibberella zeae
- Gaeumannomyces graminis
- Magnaporthe grisea
- Magnaporthe poae
- Magnaporthe oryzae
- Podospira anserina S mat
- Neurospora crassa
- Sordaria macrospora k hell
- Myceliophthora thermophila ATCC 42464
- Chaetomium globosum CBS 148.51
- Thielavia terrestris NRRL 8126
- Uncinocarpus reesii 1704
- Ajellomyces capsulatus Nam1
- Ajellomyces dermatitidis SLH14081
- Paracoccidioides sp. lutzi Fb01
- Coccidioides posadasii C735 delta SOWgp
- Coccidioides immitis RS
- Trichophyton rubrum CBS 118892
- Trichophyton verrucosum HKI 0517
- Arthroderma benhamiae CBS 112371
- Arthroderma gypseum CBS 118893
- Arthroderma otae CBS 113480
- Talaromyces stipitatus ATCC 10500
- Neosartorya fischeri
- Emmericella nidulans
- Penicillium chrysogenum Wisconsin 54 1255
- Penicillium marneffei ATCC 18224
- Aspergillus clavatus
- Aspergillus flavus
- Aspergillus oryzae
- Aspergillus niger
- Aspergillus fumigatus
- Aspergillus terreus
- Monosiga brevicollis MX1
- Amphimedon queenslandica
- Trichoplax adhaerens
- Nematostella vectensis
- Hydra magnipapillata
- Schistosoma mansoni
- Trichinella spiralis
- Pristionchus pacificus
- Caenorhabditis breneri
- Caenorhabditis briggsae
- Caenorhabditis remanei
- Caenorhabditis japonica
- Caenorhabditis elegans
- Oxodes scapularis
- Daphnia pulex
- Pediculus humanus
- Acyrtosiphon pisum
- Tribolium castaneum
- Nasonia vitripennis
- Apis mellifera
- Atta cephalotes
- Bombyx mori
- Danaus plexippus
- Heliconius melpomene
- Culex quinquefasciatus
- Aedes aegypti
- Anopheles gambiae
- Anopheles darlingi
- Drosophila virilis
- Drosophila grimshawi
- Drosophila willistoni
- Drosophila pseudoobscura
- Drosophila ananassae
- Drosophila melanogaster
- Drosophila yakuba
- Strongylocentrotus purpuratus
- Branchiostoma floridae
- Ciona intestinalis
- Ciona savignyi
- Petromyzon marinus
- Danio rerio
- Gadus morhua
- Oreochromis niloticus
- Takifugu rubripes
- Tetraodon nigroviridis
- Gasterosteus aculeatus
- Xiphophorus maculatus
- Dryas latipes
- Latimeria chalumnae
- Xenopus (Silurana) tropicalis
- Pelodiscus sinensis
- Anolis carolinensis
- Taeniopygia guttata
- Gallus gallus
- Meleagris gallopavo
- Ornithorhynchus anatinus
- Monodelphis domestica
- Sarcophilus harrisii
- Macropus eugenii
- Dasyurus novemcinctus
- Loxodonta africana
- Echinosorex tillarii
- Procavia capensis
- Myotis lucifugus
- Pteropus vampyrus
- Sus scrofa
- Tursiops truncatus
- Bos taurus
- Equus caballus
- Felis catus
- Canis lupus familiaris
- Mustela putorius furo
- Alluropoda melanoleuca
- Cryptosporidium parvum I
- Cavia porcellus
- Otidomys tridecemlineatus
- Dipodomys ordii
- Rattus norvegicus
- Mus musculus
- Tupaia belangeri
- Otolomus garretti
- Microcebus murinus
- Tarsius syrichta
- Callithrix jacchus
- Macaca mulatta
- Nomascus leucogenys
- Pongo abelii
- Gorilla gorilla
- Pan troglodytes
- Homo sapiens
- Perkinsus marinus ATCC 50983
- Tetrahymena thermophila
- Paramecium tetraurelia strain d4 2
- Neospora caninum Liverpool
- Toxoplasma gondii
- Cryptosporidium muris RN66
- Cryptosporidium parvum Iowa II
- Cryptosporidium hominis TU502
- Theileria annulata strain Ankara
- Theileria parva strain Muguga
- Plasmodium falciparum
- Plasmodium knowlesi
- Plasmodium vivax
- Plasmodium chabaudi
- Plasmodium yoelii yoelii 17XNL
- Plasmodium berghei
- Phaeodactylum tricornutum
- Thalassiosira pseudonana
- Pythium ultimum
- Albugo liliaceae
- Hyaloperonospora arabidopsidis
- Phytophthora ramorum
- Phytophthora infestans
- Phytophthora sojae
- Trypanosoma brucei
- Trypanosoma cruzi strain CL Brener
- Leishmania braziliensis MHOM BR 75 M2904
- Leishmania mexicana MHOM GT 2001 U1103
- Leishmania major
- Leishmania donovani
- Leishmania infantum JPCM5
- Entamoeba histolytica
- Entamoeba dispar SAW760
- Dicystostellum discoideum
- Dicystostellum purpureum
- Trichomonas vaginalis G3
- Trichomonas vaginalis
- Naegleria gruberi
- Giardia lamblia ATCC 50803

- OG presence
- OG absence
- Inferred root

Dscore = 0.795  
Pvalue = 3.68e-04  
AdjPvalue = 4.39e-02



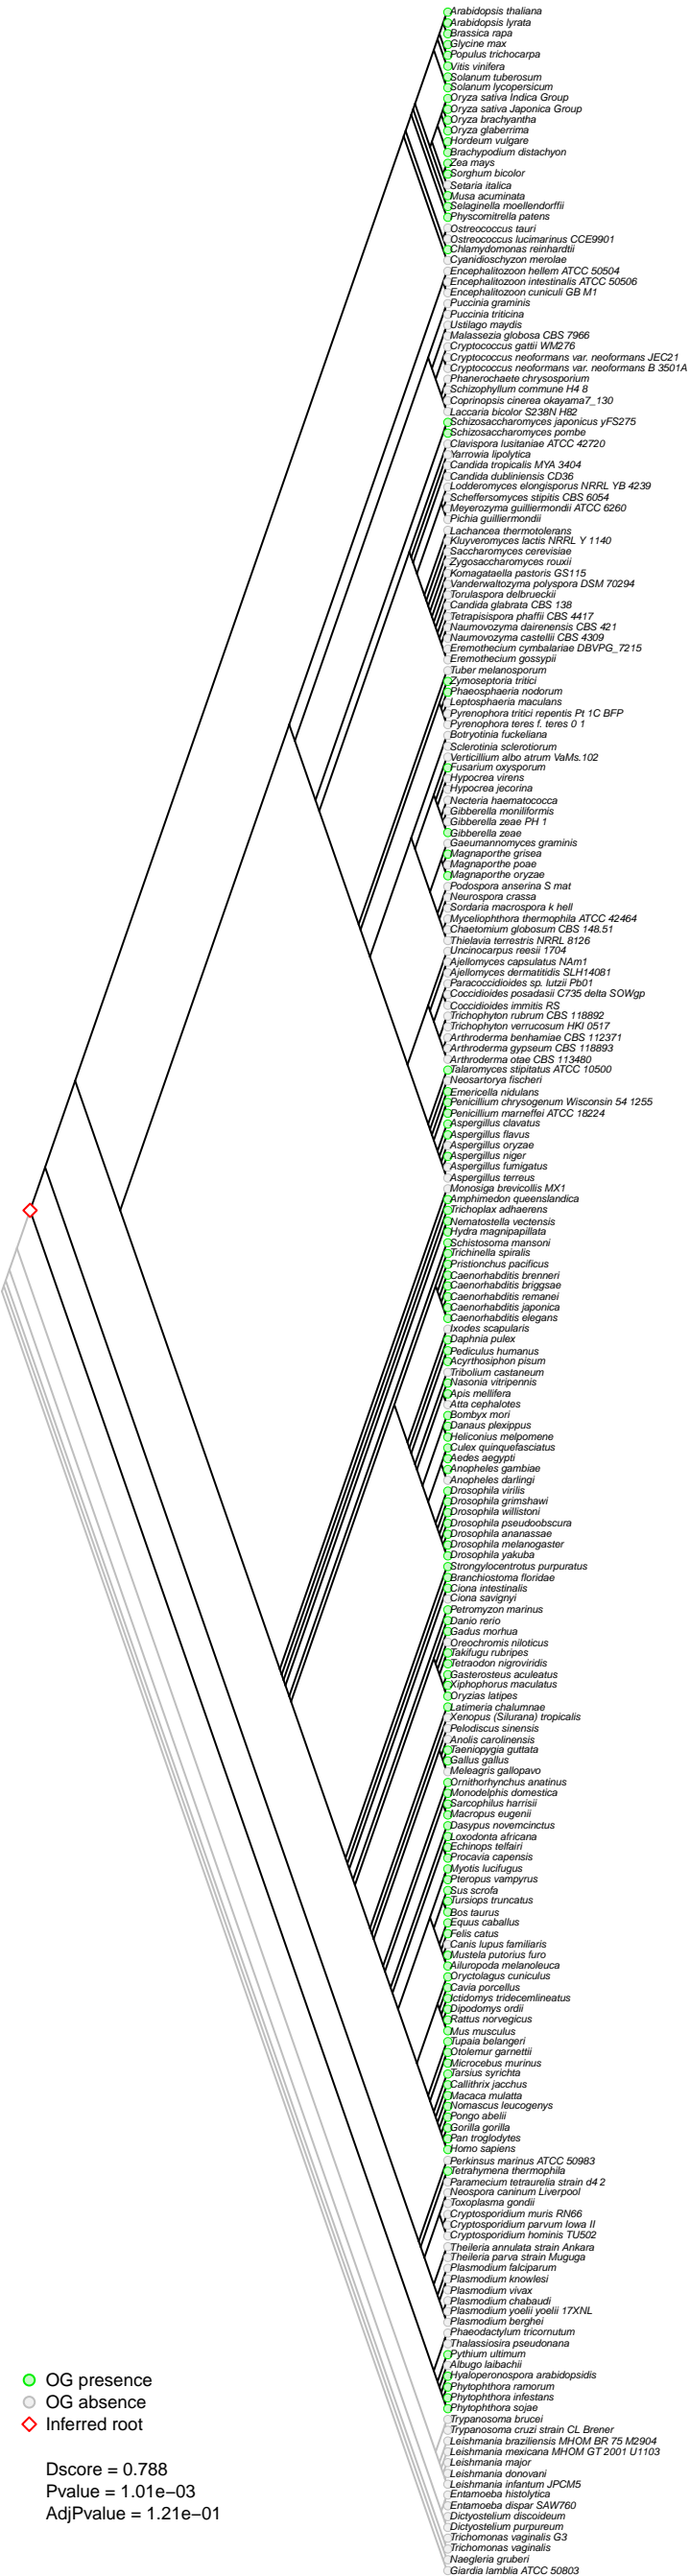

Dscore = 0.788  
 Pvalue = 1.01e-03  
 AdjPvalue = 1.21e-01

- Arabis thaliana
- Arabidopsis lyrata
- Brassica rapa
- Glycine max
- Populus trichocarpa
- Vitis vinifera
- Solanum tuberosum
- Solanum lycopersicum
- Oryza sativa Indica Group
- Oryza sativa Japonica Group
- Oryza brachyantha
- Oryza glaberrima
- Hordeum vulgare
- Brachypodium distachyon
- Zea mays
- Sorghum bicolor
- Setaria italica
- Musa acuminata
- Selaginella moellendorffii
- Physcomitrella patens
- Ostreococcus tauri
- Ostreococcus lucimarinus CCE9901
- Chlamydomonas reinhardtii
- Cyanidioschyzon merolae
- Encephalitozoon hellem ATCC 50504
- Encephalitozoon intestinalis ATCC 50506
- Encephalitozoon cuniculi GB M1
- Puccinia graminis
- Puccinia triticina
- Ustilago maydis
- Malassezia globosa CBS 7966
- Cryptococcus gattii WM276
- Cryptococcus neoformans var. neoformans JEC21
- Cryptococcus neoformans var. neoformans B 3501A
- Phanerochaete chrysosporium
- Schizophyllum commune H4 B
- Coprinopsis cinerea okayama7\_130
- Laccaria bicolor S238N H82
- Schizosaccharomyces japonicus yFS275
- Schizosaccharomyces pombe
- Clavospora lusitanae ATCC 42720
- Yarrowia lipolytica
- Candida tropicalis MYA 3404
- Candida dubliniensis CD36
- Lodderomyces elongisporus NRRL YB 4239
- Scheffersomyces stipitis CBS 6054
- Meyerozyma guilliermondii ATCC 6260
- Pichia guilliermondii
- Lachancea thermotolerans
- Kluyveromyces fragilis NRRL Y 1140
- Saccharomyces cerevisiae
- Zygosaccharomyces rouxii
- Komagataella pastoris GS115
- Vanderwaltozyma polyspora DSM 70294
- Torulopsis delbrueckii
- Candida glabrata CBS 138
- Tetrapispora phaffii CBS 4417
- Naumovozyma dairensis CBS 421
- Naumovozyma castellii CBS 4309
- Eremothecium cymbalariae DBVPG\_7215
- Eremothecium gossypii
- Tuber melanosporum
- Zymoseptoria tritici
- Phaeosphaeria nodorum
- Leptosphaeria maculans
- Pyrenophora tritici repens Pt 1C BFP
- Pyrenophora teres f. teres 0 1
- Botryotinia fuckeliana
- Sclerotinia sclerotiorum
- Verticillium albo atrum VaMs.102
- Fusarium oxysporum
- Hypocrea virens
- Hypocrea jecorina
- Nectria haematococca
- Gibberella moniliformis
- Gibberella zeae PH 1
- Gibberella zeae
- Gaeumannomyces graminis
- Magnaporthe grisea
- Magnaporthe poae
- Magnaporthe oryzae
- Podospira anserina S mat
- Neurospora crassa
- Sordaria macrospora k hell
- Myceliophthora thermophila ATCC 42464
- Chaetomium globosum CBS 148.51
- Thielavia terrestris NRRL 8126
- Uncinocarpus reesii 1704
- Ajellomyces capsulatus Nam1
- Ajellomyces dermatitidis SLH14081
- Paracoccidioides sp. lutzi Fb01
- Coccidioides posadasii C735 delta SOWgp
- Coccidioides immitis RS
- Trichophyton rubrum CBS 118892
- Trichophyton verrucosum HKI 0517
- Arthroderma benhamiae CBS 112371
- Arthroderma gypseum CBS 118893
- Arthroderma otae CBS 113480
- Talaromyces stipitatus ATCC 10500
- Neosartorya fischeri
- Emericella nidulans
- Penicillium chrysogenum Wisconsin 54 1255
- Penicillium marneffei ATCC 18224
- Aspergillus clavatus
- Aspergillus flavus
- Aspergillus oryzae
- Aspergillus niger
- Aspergillus fumigatus
- Aspergillus terreus
- Monosiga brevicollis MX1
- Amphimedon queenslandica
- Trichoplax adhaerens
- Nematostella vectensis
- Hydra magnipapillata
- Schistosoma mansoni
- Trichinella spiralis
- Pristionchus pacificus
- Caenorhabditis brenneri
- Caenorhabditis briggsae
- Caenorhabditis remanei
- Caenorhabditis japonica
- Caenorhabditis elegans
- Ixodes scapularis
- Daphnia pulex
- Pediculus humanus
- Acyrtosiphon pisum
- Tribolium castaneum
- Nasonia vitripennis
- Apis mellifera
- Atta cephalotes
- Bombyx mori
- Danaus plexippus
- Heliconius melpomene
- Culex quinquefasciatus
- Aedes aegypti
- Anopheles gambiae
- Anopheles darlingi
- Drosophila virilis
- Drosophila grimshawi
- Drosophila willistoni
- Drosophila pseudoobscura
- Drosophila ananassae
- Drosophila melanogaster
- Drosophila yakuba
- Strongylocentrotus purpuratus
- Branchiostoma floridae
- Ciona intestinalis
- Ciona savignyi
- Petromyzon marinus
- Danio rerio
- Gadus morhua
- Oreochromis niloticus
- Takifugu rubripes
- Tetraodon nigroviridis
- Gasterosteus aculeatus
- Xiphophorus maculatus
- Oryzias latipes
- Latimeria chalumnae
- Xenopus (Silurana) tropicalis
- Pelodiscus sinensis
- Anolis carolinensis
- Taeniopygia guttata
- Gallus gallus
- Meleagris gallopavo
- Ornithorhynchus anatinus
- Monodelphis domestica
- Sarcophilus harrisii
- Macropus eugenii
- Dasyurus novemcinctus
- Loxodonta africana
- Echinosorex tillamii
- Procavia capensis
- Myotis lucifugus
- Pteropus vampyrus
- Sus scrofa
- Tursiops truncatus
- Bos taurus
- Equus caballus
- Felis catus
- Canis lupus familiaris
- Mustela putorius furo
- Alluropoda melanoleuca
- Cryptolestes cuniculus
- Cavia porcellus
- Ictidomys tridecemlineatus
- Dipodomys ordii
- Rattus norvegicus
- Mus musculus
- Tupaia belangeri
- Otolomus garretti
- Microcebus murinus
- Tarsius syrichta
- Callithrix jacchus
- Macaca mulatta
- Nomascus leucogenys
- Pongo abelii
- Gorilla gorilla
- Pan troglodytes
- Homo sapiens
- Perkinsus marinus ATCC 50983
- Tetrahymena thermophila
- Paramecium tetraurelia strain d4 2
- Neospora caninum Liverpool
- Toxoplasma gondii
- Cryptosporidium muris RN66
- Cryptosporidium parvum Iowa II
- Cryptosporidium hominis TU502
- Theileria annulata strain Ankara
- Theileria parva strain Muguga
- Plasmodium falciparum
- Plasmodium knowlesi
- Plasmodium vivax
- Plasmodium chabaudi
- Plasmodium yoelii yoelii 17XNL
- Plasmodium berghei
- Phaeodactylum tricornutum
- Thalassiosira pseudonana
- Pythium ultimum
- Albugo liliaceae
- Hyaloperonospora arabidopsidis
- Phytophthora ramorum
- Phytophthora infestans
- Phytophthora sojae
- Trypanosoma brucei
- Trypanosoma cruzi strain CL Brener
- Leishmania braziliensis MHOM BR 75 M2904
- Leishmania mexicana MHOM GT 2001 U1103
- Leishmania major
- Leishmania donovani
- Leishmania infantum JPCM5
- Entamoeba histolytica
- Entamoeba dispar SAW760
- Dicystostellum discoideum
- Dicystostellum purpureum
- Trichomonas vaginalis G3
- Trichomonas vaginalis
- Naegleria gruberi
- Giardia lamblia ATCC 50803

- OG presence
- OG absence
- Inferred root

Dscore = 0.993  
Pvalue = 7.44e-06  
AdjPvalue = 8.85e-04

- Arabis thaliana
- Arabidopsis lyrata
- Brassica rapa
- Glycine max
- Populus trichocarpa
- Vitis vinifera
- Solanum tuberosum
- Solanum lycopersicum
- Oryza sativa Indica Group
- Oryza sativa Japonica Group
- Oryza brachyantha
- Oryza glaberrima
- Hordeum vulgare
- Brachypodium distachyon
- Zea mays
- Sorghum bicolor
- Setaria italica
- Musa acuminata
- Selaginella moellendorffii
- Physcomitrella patens
- Ostreococcus tauri
- Ostreococcus lucimarinus CCE9901
- Chlamydomonas reinhardtii
- Cyanidioschyzon merolae
- Encephalitozoon hellem ATCC 50504
- Encephalitozoon intestinalis ATCC 50506
- Encephalitozoon cuniculi GB M1
- Puccinia graminis
- Puccinia triticina
- Ustilago maydis
- Melassezia globosa CBS 7966
- Cryptococcus gattii WM276
- Cryptococcus neoformans var. neoformans JEC21
- Cryptococcus neoformans var. neoformans B 3501A
- Phanerochaete chrysosporium
- Schizophyllum commune H4 B
- Coprinopsis cinerea okayama7\_130
- Laccaria bicolor S238N H82
- Schizosaccharomyces japonicus yFS275
- Schizosaccharomyces pombe
- Clavospora lusitanae ATCC 42720
- Yarrowia lipolytica
- Candida tropicalis MYA 3404
- Candida dubliniensis CD36
- Lodderomyces elongisporus NRRL YB 4239
- Scheffersomyces stipitis CBS 6054
- Meyerozyma guilliermondii ATCC 6260
- Pichia guilliermondii
- Lachancea thermotolerans
- Kluyveromyces fragilis NRRL Y 1140
- Saccharomyces cerevisiae
- Zygosaccharomyces rouxii
- Komagataella pastoris GS115
- Vanderwaltozyma polyspora DSM 70294
- Torulopsis delbrueckii
- Candida glabrata CBS 138
- Tetrapispora phaffii CBS 4417
- Naumovozyma dairensis CBS 421
- Naumovozyma castellii CBS 4309
- Eremothecium cymbalariae DBVPG\_7215
- Eremothecium gossypii
- Tuber melanosporum
- Zymoseptoria tritici
- Phaeosphaeria nodorum
- Leptosphaeria maculans
- Pyrenophora tritici repens Pt 1C BFP
- Pyrenophora teres f. teres 0 1
- Botryotinia fuckeliana
- Sclerotinia sclerotiorum
- Verticillium albo atrum VaMs.102
- Fusarium oxysporum
- Hypocrea virens
- Hypocrea jecorina
- Nectria haematococca
- Gibberella moniliformis
- Gibberella zeae PH 1
- Gibberella zeae
- Gaeumannomyces graminis
- Magnaporthe grisea
- Magnaporthe poae
- Magnaporthe oryzae
- Podospira anserina S mat
- Neurospora crassa
- Sordaria macrospora k hell
- Myceliophthora thermophila ATCC 42464
- Chaetomium globosum CBS 148.51
- Thielavia terrestris NRRL 8126
- Uncinocarpus reesii 1704
- Ajellomyces capsulatus Nam1
- Ajellomyces dermatitidis SLH14081
- Paracoccidioides sp. lutzi Fb01
- Coccidioides posadasii C735 delta SOWgp
- Coccidioides immitis RS
- Trichophyton rubrum CBS 118892
- Trichophyton verrucosum HKI 0517
- Arthroderma benhamiae CBS 112371
- Arthroderma gypseum CBS 118893
- Arthroderma otae CBS 113480
- Talaromyces stipitatus ATCC 10500
- Neosartorya fischeri
- Emericella nidulans
- Penicillium chrysogenum Wisconsin 54 1255
- Penicillium marneffei ATCC 18224
- Aspergillus clavatus
- Aspergillus flavus
- Aspergillus oryzae
- Aspergillus niger
- Aspergillus fumigatus
- Aspergillus terreus
- Monosiga brevicollis MX1
- Amphimedon queenslandica
- Trichoplax adhaerens
- Nematostella vectensis
- Hydra magnipapillata
- Schistosoma mansoni
- Trichinella spiralis
- Pristionchus pacificus
- Caenorhabditis breneri
- Caenorhabditis briggsae
- Caenorhabditis remanei
- Caenorhabditis japonica
- Caenorhabditis elegans
- Ixodes scapularis
- Daphnia pulex
- Pediculus humanus
- Acyrtosiphon pisum
- Tribolium castaneum
- Nasonia vitripennis
- Apis mellifera
- Atta cephalotes
- Bombyx mori
- Danaus plexippus
- Heliconius melpomene
- Culex quinquefasciatus
- Aedes aegypti
- Anopheles gambiae
- Anopheles darlingi
- Drosophila virilis
- Drosophila grimshawi
- Drosophila willistoni
- Drosophila pseudoobscura
- Drosophila ananassae
- Drosophila melanogaster
- Drosophila yakuba
- Strongylocentrotus purpuratus
- Branchiostoma floridae
- Ciona intestinalis
- Ciona savignyi
- Petromyzon marinus
- Danio rerio
- Gadus morhua
- Oreochromis niloticus
- Takifugu rubripes
- Tetraodon nigroviridis
- Gasterosteus aculeatus
- Xiphophorus maculatus
- Oryzias latipes
- Latimeria chalumnae
- Xenopus (Silurana) tropicalis
- Pelodiscus sinensis
- Anolis carolinensis
- Taeniopygia guttata
- Gallus gallus
- Meleagris gallopavo
- Ornithorhynchus anatinus
- Monodelphis domestica
- Sarcophilus harrisii
- Macropus eugenii
- Dasyurus novemcinctus
- Loxodonta africana
- Echinops telfairii
- Procavia capensis
- Myotis lucifugus
- Pteropus vampyrus
- Sus scrofa
- Tursiops truncatus
- Bos taurus
- Equus caballus
- Felis catus
- Canis lupus familiaris
- Mustela putorius furo
- Alluropoda melanoleuca
- Cryptolestes cuniculus
- Cavia porcellus
- Ictidomys tridecemlineatus
- Dipodomys ordii
- Rattus norvegicus
- Mus musculus
- Tupaia belangeri
- Otolomus garretti
- Microcebus murinus
- Tarsius syrichta
- Callithrix jacchus
- Macaca mulatta
- Nomascus leucogenys
- Pongo abelii
- Gorilla gorilla
- Pan troglodytes
- Homo sapiens
- Perkinsus marinus ATCC 50983
- Tetrahymena thermophila
- Paramecium tetraurelia strain d4 2
- Neospora caninum Liverpool
- Toxoplasma gondii
- Cryptosporidium muris RN66
- Cryptosporidium parvum Iowa II
- Cryptosporidium hominis TU502
- Theileria annulata strain Ankara
- Theileria parva strain Muguga
- Plasmodium falciparum
- Plasmodium knowlesi
- Plasmodium vivax
- Plasmodium chabaudi
- Plasmodium yoelii yoelii 17XNL
- Plasmodium berghei
- Phaeodactylum tricornutum
- Thalassiosira pseudonana
- Pythium ultimum
- Albugo liliaceae
- Hyaloperonospora arabidopsidis
- Phytophthora ramorum
- Phytophthora infestans
- Phytophthora sojae
- Trypanosoma brucei
- Trypanosoma cruzi strain CL Brener
- Leishmania braziliensis MHOM BR 75 M2904
- Leishmania mexicana MHOM GT 2001 U1103
- Leishmania major
- Leishmania donovani
- Leishmania infantum JPCM5
- Entamoeba histolytica
- Entamoeba dispar SAW760
- Dicystostellum discoideum
- Dicystostellum purpureum
- Trichomonas vaginalis G3
- Trichomonas vaginalis
- Naegleria gruberi
- Giardia lamblia ATCC 50803

- OG presence
- OG absence
- Inferred root

Dscore = 0.995  
Pvalue = 2.16e-05  
AdjPvalue = 2.57e-03

- Arabis thaliana
- Arabis lyrata
- Brassica rapa
- Glycine max
- Populus trichocarpa
- Vitis vinifera
- Solanum tuberosum
- Solanum lycopersicum
- Oryza sativa Indica Group
- Oryza sativa Japonica Group
- Oryza brachyantha
- Oryza glaberrima
- Hordeum vulgare
- Brachypodium distachyon
- Zea mays
- Sorghum bicolor
- Setaria italica
- Musa acuminata
- Selaginella moellendorffii
- Physcomitrella patens
- Ostreococcus tauri
- Ostreococcus lucimarinus CCE9901
- Chlamydomonas reinhardtii
- Cyanidioschyzon merolae
- Encephalitozoon hellem ATCC 50504
- Encephalitozoon intestinalis ATCC 50506
- Encephalitozoon cuniculi GB M1
- Puccinia graminis
- Puccinia triticina
- Ustilago maydis
- Melassezia globosa CBS 7966
- Cryptococcus gattii WM276
- Cryptococcus neoformans var. neoformans JEC21
- Cryptococcus neoformans var. neoformans B 3501A
- Phanerochaete chrysosporium
- Schizophyllum commune H4 B
- Coprinopsis cinerea okayama7\_130
- Laccaria bicolor S238N H82
- Schizosaccharomyces japonicus yFS275
- Schizosaccharomyces pombe
- Clavospora lusitanae ATCC 42720
- Yarrowia lipolytica
- Candida tropicalis MYA 3404
- Candida dubliniensis CD36
- Lodderomyces elongisporus NRRL YB 4239
- Scheffersomyces stipitis CBS 6054
- Meyerozyma guilliermondii ATCC 6260
- Pichia guilliermondii
- Lachancea thermotolerans
- Kluyveromyces lactis NRRL Y 1140
- Saccharomyces cerevisiae
- Zygosaccharomyces rouxii
- Komagataella pastoris GS115
- Vanderwaltozyma polyspora DSM 70294
- Torulopsis delbrueckii
- Candida glabrata CBS 138
- Tetrapispora phaffii CBS 4417
- Naumovozyma dairenensis CBS 421
- Naumovozyma castellii CBS 4309
- Eremothecium cymbalariae DBVPG\_7215
- Eremothecium gossypii
- Tuber melanosporum
- Zymoseptoria tritici
- Phaeosphaeria nodorum
- Leptosphaeria maculans
- Pyrenophora tritici repens Pt 1C BFP
- Pyrenophora teres f. teres 0 1
- Botryotinia fuckeliana
- Sclerotinia sclerotiorum
- Verticillium albo atrum VaMs.102
- Fusarium oxysporum
- Hypocrea virens
- Hypocrea jecorina
- Nectria haematococca
- Gibberella moniliformis
- Gibberella zeae PH 1
- Gibberella zeae
- Gaeumannomyces graminis
- Magnaporthe grisea
- Magnaporthe poae
- Magnaporthe oryzae
- Podospira anserina S mat
- Neurospora crassa
- Sordaria macrospora k hell
- Myceliophthora thermophila ATCC 42464
- Chaetomium globosum CBS 148.51
- Thielavia terrestris NRRL 8126
- Uncinocarpus reesii 1704
- Ajellomyces capsulatus Nam1
- Ajellomyces dermatitidis SLH14081
- Paracoccidioides sp. lutzi Pb01
- Coccidioides posadasii C735 delta SOWgp
- Coccidioides immitis RS
- Trichophyton rubrum CBS 118892
- Trichophyton verrucosum HKI 0517
- Arthroderma benhamiae CBS 112371
- Arthroderma gypseum CBS 118893
- Arthroderma otae CBS 113480
- Talaromyces stipitatus ATCC 10500
- Neosartorya fischeri
- Emericella nidulans
- Penicillium chrysogenum Wisconsin 54 1255
- Penicillium marneffei ATCC 18224
- Aspergillus clavatus
- Aspergillus flavus
- Aspergillus oryzae
- Aspergillus niger
- Aspergillus fumigatus
- Aspergillus terreus
- Monosiga brevicollis MX1
- Amphimedon queenslandica
- Trichoplax adhaerens
- Nematostella vectensis
- Hydra magnipapillata
- Schistosoma mansoni
- Trichinella spiralis
- Pristionchus pacificus
- Caenorhabditis brenneri
- Caenorhabditis briggsae
- Caenorhabditis remanei
- Caenorhabditis japonica
- Caenorhabditis elegans
- Ixodes scapularis
- Daphnia pulex
- Pediculus humanus
- Acyrtosiphon pisum
- Tribolium castaneum
- Nasonia vitripennis
- Apis mellifera
- Atta cephalotes
- Bombyx mori
- Danaus plexippus
- Heliconius melpomene
- Culex quinquefasciatus
- Aedes aegypti
- Anopheles gambiae
- Anopheles darlingi
- Drosophila virilis
- Drosophila grimshawi
- Drosophila willistoni
- Drosophila pseudoobscura
- Drosophila ananassae
- Drosophila melanogaster
- Drosophila yakuba
- Strongylocentrotus purpuratus
- Branchiostoma floridae
- Ciona intestinalis
- Ciona savignyi
- Petromyzon marinus
- Danio rerio
- Gadus morhua
- Oreochromis niloticus
- Takifugu rubripes
- Tetraodon nigroviridis
- Gasterosteus aculeatus
- Xiphophorus maculatus
- Oryzias latipes
- Latimeria chalumnae
- Xenopus (Silurana) tropicalis
- Pelodiscus sinensis
- Anolis carolinensis
- Taeniopygia guttata
- Gallus gallus
- Meleagris gallopavo
- Ornithorhynchus anatinus
- Monodelphis domestica
- Sarcophilus harrisii
- Macropus eugenii
- Dasyurus novemcinctus
- Loxodonta africana
- Echinops telfairii
- Procavia capensis
- Myotis lucifugus
- Pteropus vampyrus
- Sus scrofa
- Tursiops truncatus
- Bos taurus
- Equus caballus
- Felis catus
- Canis lupus familiaris
- Mustela putorius furo
- Alluropoda melanoleuca
- Cryptolestes cuniculus
- Cavia porcellus
- Ictidomys tridecemlineatus
- Dipodomys ordii
- Rattus norvegicus
- Mus musculus
- Tupaia belangeri
- Urolemur garnettii
- Microcebus murinus
- Tarsius syrichta
- Callithrix jacchus
- Macaca mulatta
- Nomascus leucogenys
- Pongo abelii
- Gorilla gorilla
- Pan troglodytes
- Homo sapiens
- Perkinsus marinus ATCC 50983
- Tetrahymena thermophila
- Paramecium tetraurelia strain d4 2
- Neospora caninum Liverpool
- Toxoplasma gondii
- Cryptosporidium muris RN66
- Cryptosporidium parvum Iowa II
- Cryptosporidium hominis TU502
- Theileria annulata strain Ankara
- Theileria parva strain Muguga
- Plasmodium falciparum
- Plasmodium knowlesi
- Plasmodium vivax
- Plasmodium chabaudi
- Plasmodium yoelii yoelii 17XNL
- Plasmodium berghei
- Phaeodactylum tricorutum
- Thalassiosira pseudonana
- Pythium ultimum
- Albugo liliaceae
- Hyaloperonospora arabidopsidis
- Phytophthora ramorum
- Phytophthora infestans
- Phytophthora sojae
- Trypanosoma brucei
- Trypanosoma cruzi strain CL Brener
- Leishmania braziliensis MHOM BR 75 M2904
- Leishmania mexicana MHOM GT 2001 U1103
- Leishmania major
- Leishmania donovani
- Leishmania infantum JPCM5
- Entamoeba histolytica
- Entamoeba dispar SAW760
- Dicystostellum discoideum
- Dicystostellum purpureum
- Trichomonas vaginalis G3
- Trichomonas vaginalis
- Naegleria gruberi
- Giardia lamblia ATCC 50803

- OG presence
- OG absence
- Inferred root

Dscore = 0.947  
Pvalue = 9.57e-06  
AdjPvalue = 1.14e-03
